# Supplementary material for: Functional and conformational impact of cancer-associated SF3B1 mutations depends on the position and the charge of amino acid substitution
Source: PubMed Central journal article supplement — Comput Struct Biotechnol J. 2021 Feb 27;19:1361–70. doi: 10.1016/j.csbj.2021.02.012 (PMC7960499; doi:10.1016/j.csbj.2021.02.012), 2021-02-27
Supplement: mmc2.pdf [file mmc2.pdf]

Supplementary Table 1. Primer sequences used to generate mutated SF3B1 constructs

| Mutated SF3B1 constructs                           | Primer sense | Sequence 5' 3'                                |
|----------------------------------------------------|--------------|-----------------------------------------------|
| pCMV-3tag-1A <i>SF3B1</i> <sup>R625H</sup>         | Forward      | gacaacatggacgagtacgtgcataataccactgctagagcattc |
|                                                    | Reverse      | gaatgctctagcagtggtattatgcacgtactcgtccatgttgc  |
| pCMV-3tag-1A <i>SF3B1</i> <sup>H662R</sup>         | Forward      | gcaggcccgccgcaccggcatca                       |
|                                                    | Reverse      | tgatgccggtgcggcgggctgc                        |
| pCMV-3tag-1A <i>SF3B1</i> <sup>I665F</sup>         | Forward      | ccgccacaccggctcaagattgtgcag                   |
|                                                    | Reverse      | ctgcacaatcttgaagccggtgtggcggg                 |
| pCMV-3tag-1A <i>SF3B1</i> <sup>K666T</sup>         | Forward      | gccacaccggcatcacgattgtgcagcagat               |
|                                                    | Reverse      | atctgctgcacaatcgtgatgccggtgtggc               |
| pCMV-3tag-1A <i>SF3B1</i> <sup>K700E</sup>         | Forward      | ctggtggatgagcagcaggaggtcagaacctctctgc         |
|                                                    | Reverse      | gcagagatggttctgacctctgctgctcatccaccag         |
| pCMV-3tag-1A <i>SF3B1</i> <sup>G740E</sup>         | Forward      | cgccagcacaggggagaaaggactggccg                 |
|                                                    | Reverse      | cggccagtcctttctccctgtgctggcg                  |
| pCMV-3tag-1A <i>SF3B1</i> <sup>K741E</sup>         | Forward      | cagcacagggcggaaggactggccg                     |
|                                                    | Reverse      | cggccagtccttcgccctgtgctg                      |
| pCMV-3tag-1A <i>SF3B1</i> <sup>K741N</sup>         | Forward      | agcacaggggcaatggactggccgc                     |
|                                                    | Reverse      | gcgccagtccttcgccctgtgctg                      |
| pCMV-3tag-1A <i>SF3B1</i> <sup>K741Q</sup>         | Forward      | cagcacaggggccaaggactggccg                     |
|                                                    | Reverse      | cggccagtccttcgccctgtgctg                      |
| pCMV-3tag-1A <i>SF3B1</i> <sup>G742D</sup>         | Forward      | cagcacaggggcaaagatctggccgcttttctca            |
|                                                    | Reverse      | tgagaaaagcggccagatctttgccctgtgctg             |
| pCMV-3tag-1A <i>SF3B1</i> <sup>D781E</sup>         | Forward      | ggagttccagtcacctgaggaggaaatgaagaaaatc         |
|                                                    | Reverse      | gattttctcatttctcctcaggggactggaactcc           |
| pCMV-3tag-1A <i>SF3B1</i> <sup>Del (622-781)</sup> | Forward      | ccagatattgacaacatggacgaggaaatgaagaaaatcgtc    |
|                                                    | Reverse      | gacgattttctcatttctcctcgtccatgttgcataatctgg    |

Supplementary Table 2. Primer sequences used for RT-qPCR amplification

| Target                           | Primer sense | Sequence 5' 3'           |
|----------------------------------|--------------|--------------------------|
| <i>DPH5</i> canonical junction   | Forward      | gagaccagaaagcttcttgaca   |
|                                  | Reverse      | tcttcttccttgattagatttt   |
| <i>DPH5</i> aberrant junction    | Forward      | gagaccagaaagcttcttgaca   |
|                                  | Reverse      | ggcagaaaattgattagattttcc |
| <i>DLST</i> canonical junction   | Forward      | cagtgtcttcagtgttcgcttt   |
|                                  | Reverse      | gtctccaacagctttctccc     |
| <i>DLST</i> aberrant junction    | Forward      | cagtgtcttcagtgttcgcttt   |
|                                  | Reverse      | gactcaaaggctttctcccac    |
| <i>ENOSF1</i> canonical junction | Forward      | gtttaaagtaaaggtgggtgctg  |
|                                  | Reverse      | gcaaaaagagaccaaagtctttcc |
| <i>ENOSF1</i> aberrant junction  | Forward      | gtttaaagtaaaggtgggtgctg  |
|                                  | Reverse      | tggcatccatcatcaaagtc     |
| <i>ARMC9</i> canonical junction  | Forward      | gaagccgatctggacaaaga     |
|                                  | Reverse      | tggtggaaggaaagagaaaaa    |
| <i>ARMC9</i> aberrant junction   | Forward      | gaagccgatctggacaaaga     |
|                                  | Reverse      | tggtcatgatccccaggtac     |
| <i>GUSB</i>                      | Forward      | ggaatthtccgatttcatga     |
|                                  | Reverse      | gccgagtgaagatccccttt     |

Supplementary Table 3. List of SBT scores in tumor samples

| Sample ID        | Cohort | SBT seq found | Corrected SBT Score | SBT size corrected Score | RNAseq size_Gb | SF3B1 mutation | Tumor content | SF3B1 <sup>Mut</sup> VAF_WXS |
|------------------|--------|---------------|---------------------|--------------------------|----------------|----------------|---------------|------------------------------|
| TCGA-WC-AA9E-01A | UVM    | 889           | 801                 | 800,07                   | 7,3            | p.R625H        | 1             | 0,46                         |
| TCGA-VD-A8KH-01A | UVM    | 933           | 795                 | 810,04                   | 9,2            | p.R625H        | 1             | 0,42                         |
| TCGA-VD-A8K9-01A | UVM    | 906           | 789                 | 797,82                   | 8,4            | p.R625C        | 1             | 0,53                         |
| TCGA-V4-A9EW-01A | UVM    | 864           | 760                 | 764,39                   | 7,9            | p.R625C        | 0,7           | 0,43                         |
| TCGA-VD-A8KA-01B | UVM    | 821           | 725                 | 726,24                   | 7,6            | p.R625C        | 1             | 0,55                         |
| TCGA-DK-A1AE-01A | BLCA   | 908           | 717                 | 751,26                   | 11,2           | p.R625C        | 0,83          | 0,39                         |
| TCGA-FR-A7U8-06A | SKCM   | 774           | 715                 | 703,03                   | 6,2            | p.R625H        | 0,95          | 0,43                         |
| TCGA-V4-A9F4-01A | UVM    | 758           | 704                 | 691,55                   | 6              | p.R625H        | 0,7           | 0,42                         |
| TCGA-RP-A690-06A | SKCM   | 806           | 702                 | 705,88                   | 7,9            | p.R625H        | 0,95          | 0,46                         |
| TCGA-V4-A9ES-01A | UVM    | 817           | 676                 | 693,08                   | 9,3            | p.R625H        | 1             | 0,35                         |
| TCGA-25-1631-01A | OV     | 935           | 646                 | 713,23                   | 14,9           | p.K700E        | 1             | NA                           |
| TCGA-V4-A9EJ-01A | UVM    | 757           | 640                 | 647,77                   | 8,4            | p.R625H        | 1             | 0,41                         |
| TCGA-EW-A1P5-01A | BRCA   | 698           | 623                 | 616,59                   | 6,8            | p.K700E        | 0,64          | 0,65                         |
| TCGA-ER-A3ES-06A | SKCM   | 597           | 622                 | 582,08                   | 3              | p.R625H        | 0,95          | 0,7                          |
| TCGA-VD-A8KB-01A | UVM    | 700           | 617                 | 614,32                   | 7,1            | p.R625C        | 1             | 0,4                          |
| TCGA-GN-A4U4-06A | SKCM   | 728           | 611                 | 619,85                   | 8,4            | p.N626Y        | 0,83          | 0,28                         |
| TCGA-A2-A0EV-01A | BRCA   | 677           | 610                 | 602,39                   | 6,5            | p.K700E        | 0,6           | 0,44                         |
| TCGA-ER-A2NF-01A | SKCM   | 809           | 605                 | 657,36                   | 11,7           | p.R625H        | 0,95          | 0,31                         |
| TCGA-C8-A26V-01A | BRCA   | 840           | 596                 | 648,49                   | 13,2           | p.K700E        | 0,93          | 0,29                         |
| TCGA-BH-A18M-01A | BRCA   | 659           | 568                 | 576,77                   | 7,4            | p.K700E        | 0,45          | 0,27                         |
| TCGA-AC-A2B8-01A | BRCA   | 732           | 562                 | 588,33                   | 10,4           | p.E622Q        | 0,59          | 0,36                         |
| TCGA-AN-A0XO-01A | BRCA   | 697           | 543                 | 565,17                   | 9,8            | p.K700E        | 0,76          | 0,39                         |
| TCGA-DX-AB2J-01A | SARC   | 686           | 540                 | 558,92                   | 9,5            | p.K700E        | 0,96          | 0,42                         |
| TCGA-AR-A1AM-01A | BRCA   | 653           | 538                 | 547,05                   | 8,3            | p.K700E        | 0,46          | 0,21                         |
| TCGA-VS-A9UQ-01A | CESC   | 565           | 517                 | 501,55                   | 5,8            | p.K666E        | 0,78          | 0,26                         |
| TCGA-WC-A881-01A | UVM    | 556           | 510                 | 494,20                   | 5,7            | p.H662R        | 1             | 0,51                         |
| TCGA-AB-2929-03A | LAML   | 609           | 500                 | 506,33                   | 8,1            | p.K700E        | 1             | 0,51                         |

|                  |      |     |     |        |      |         |      |      |
|------------------|------|-----|-----|--------|------|---------|------|------|
| TCGA-AB-2944-03A | LAML | 575 | 487 | 485,85 | 7,3  | p.K700E | 1    | NA   |
| TCGA-BH-A201-01A | BRCA | 626 | 485 | 501,29 | 9,3  | p.K700E | 0,68 | 0,23 |
| TCGA-E2-A10F-01A | BRCA | 564 | 481 | 477,34 | 7,1  | p.D781E | 0,8  | NA   |
| TCGA-V4-A9E9-01A | UVM  | 535 | 479 | 466,68 | 6,1  | p.R625H | 1    | 0,38 |
| TCGA-ZF-A9R4-01A | BLCA | 520 | 469 | 455,77 | 5,9  | p.G740E | 0,92 | 0,36 |
| TCGA-W5-AA2U-01A | CHOL | 535 | 465 | 465,68 | 6,6  | p.G740E | 1    | 0,31 |
| TCGA-E9-A1R3-01A | BRCA | 673 | 455 | 499,42 | 12,2 | p.N626D | 0,82 | 0,26 |
| TCGA-WC-A885-01A | UVM  | 449 | 453 | 420,25 | 3,8  | p.R625H | 1    | 0,42 |
| TCGA-AB-2882-03A | LAML | 560 | 443 | 452,31 | 8,4  |         | 1    |      |
| TCGA-BH-A0DQ-01A | BRCA | 491 | 437 | 431,37 | 6    | p.K700E | 0,73 | 0,4  |
| TCGA-13-1408-01A | OV   | 844 | 436 | 544,98 | 19,4 | p.K700E | 0,7  | NA   |
| TCGA-86-8281-01A | LUAD | 591 | 432 | 455,14 | 10   | p.N626Y | 0,62 | 0,29 |
| TCGA-BH-A0HP-01A | BRCA | 546 | 426 | 435,58 | 8,5  | p.K666E | 0,59 | 0,29 |
| TCGA-2A-A8VX-01A | PRAD | 474 | 410 | 400,43 | 6,4  | p.K700E | 0,93 | 0,48 |
| TCGA-FR-A8YD-06A | SKCM | 471 | 404 | 394,93 | 6,5  | p.K700E | 0,86 | 0,3  |
| TCGA-WC-AA9A-01A | UVM  | 550 | 404 | 422,28 | 9,5  | p.K666T | 1    | 0,43 |
| TCGA-B6-A0WT-01A | BRCA | 443 | 402 | 384,21 | 5,5  | p.K700E | 0,87 | 0,36 |
| TCGA-YZ-A985-01A | UVM  | 407 | 398 | 370,48 | 4,3  | p.R625C | 1    | 0,49 |
| TCGA-IB-A7LX-01A | PAAD | 486 | 390 | 391,54 | 7,6  | p.G740E | 0,72 | 0,24 |
| TCGA-DA-A3F8-06A | SKCM | 539 | 388 | 408,16 | 9,7  | p.R625C | 0,24 | 0,18 |
| TCGA-V4-A9EZ-01A | UVM  | 413 | 380 | 360,50 | 5,2  | p.R625H | 1    | 0,41 |
| TCGA-J4-A83L-01A | PRAD | 497 | 372 | 382,90 | 8,7  | p.E622D | 0,5  | 0,13 |
| TCGA-86-8669-01A | LUAD | 379 | 370 | 341,65 | 4,3  | p.G740E | 0,82 | 0,19 |
| TCGA-V4-A9EA-01A | UVM  | 359 | 353 | 323,51 | 4,2  | p.R625C | 1    | 0,41 |
| TCGA-ER-A19S-06A | SKCM | 477 | 352 | 362,58 | 8,7  | p.R625C | 0,24 | 0,1  |
| TCGA-E2-A56Z-01A | BRCA | 438 | 334 | 338,44 | 7,9  | p.K700E | 0,9  | 0,14 |
| TCGA-ZB-A96F-01A | THYM | 400 | 333 | 325,38 | 6,5  | p.K700E | 0,3  | 0,24 |
| TCGA-V4-A9E5-01A | UVM  | 347 | 322 | 299,61 | 4,9  | p.K666T | 1    | 0,47 |
| TCGA-EP-A26S-01A | LIHC | 414 | 321 | 330,15 | 7,5  | p.K666T | 0,96 | 0,47 |
| TCGA-DV-A4W0-01A | KIRC | 413 | 314 | 325,93 | 7,7  | p.K741E | 0,73 | 0,37 |

|                  |      |     |     |        |      |         |                   |      |
|------------------|------|-----|-----|--------|------|---------|-------------------|------|
| TCGA-XM-A8RI-01A | THYM | 384 | 291 | 290,80 | 7,5  | p.K700E | 0,3               | 0,08 |
| TCGA-VP-A87C-01A | PRAD | 374 | 286 | 283,86 | 7,3  | p.K741E | 0,4               | 0,3  |
| TCGA-V4-A9EC-01A | UVM  | 308 | 270 | 251,12 | 5,4  | p.T663P | 0,8               | 0,43 |
| TCGA-BH-A5J0-01A | BRCA | 363 | 264 | 267,56 | 7,7  | p.K700E | 0,76              | 0,15 |
| TCGA-44-2659-01A | LUAD | 419 | 254 | 279,06 | 10,2 | p.K741N | 0,8               | 0,38 |
| TCGA-99-8025-01A | LUAD | 384 | 238 | 256,08 | 9,5  | p.G740V | 0,8               | 0,26 |
| TCGA-WC-A87W-01A | UVM  | 321 | 233 | 231,29 | 7,3  |         | 1                 |      |
| TCGA-75-5125-01A | LUAD | 257 | 224 | 203,67 | 5,2  | p.K700E | 0,6               | 0,11 |
| TCGA-G8-6324-01A | DLBC | 283 | 198 | 194,85 | 7,2  | p.K700E | 0,6               | 0,32 |
| TCGA-LD-A74U-01A | BRCA | 311 | 194 | 202,15 | 8,4  | p.K666E | 0,3               | 0,15 |
| TCGA-B5-A3FA-01A | UCEC | 228 | 193 | 172,74 | 5,3  | p.R549C | 0,93              | 0,23 |
| TCGA-UY-A78N-01A | BLCA | 301 | 186 | 194,13 | 8,3  | p.Q699E | 0,93              | 0,76 |
| TCGA-3K-AAZ8-01A | LIHC | 227 | 168 | 157,44 | 6,2  | p.N626H | 0,53              | 0,11 |
| TCGA-NJ-A550-01A | LUAD | 217 | 166 | 151,94 | 5,9  | p.R775L | 0,1               | 0,1  |
| TCGA-EE-A2A1-06A | SKCM | 400 | 151 | 204,98 | 13,4 |         | 0,41              |      |
| TCGA-D8-A1JH-01A | BRCA | 344 | 148 | 183,83 | 11,4 | p.K700E | 0,1               | 0,05 |
| TCGA-DD-AAD2-01A | LIHC | 167 | 145 | 120,74 | 4,8  | p.K741N | 0,54              | 0,19 |
| TCGA-AB-2973-03A | LAML | 224 | 125 | 128,61 | 7,7  | p.K666N | NA                | 0,4  |
| TCGA-B0-5698-01A | KIRC | 296 | 118 | 148,56 | 10,7 | p.G742D | 0,9               | 0,2  |
| TCGA-CZ-4864-01A | KIRC | 262 | 111 | 142,64 | 9,7  | p.G742D | 0,7               | 0,04 |
| TCGA-TS-A7P8-01A | MESO | 177 | 107 | 99,44  | 6,6  | p.G742D | Low Tumor Content | 0,27 |
| TCGA-B6-A0I2-01A | BRCA | 171 | 107 | 97,00  | 6,4  | p.A633V | 0,62              | 0,55 |
| TCGA-MI-A75I-01A | LIHC | 184 | 106 | 100,99 | 6,9  | p.K741Q | 0,88              | 0,36 |
| TCGA-20-1683-01A | OV   | 677 | 327 | 416,90 | 17,2 |         | 0,85              |      |
| TCGA-B7-A5TJ-01A | STAD | 509 | 223 | 290,52 | 14,8 |         | 0,74              |      |
| TCGA-AK-3454-01A | KIRC | 164 | 163 | 132,26 | 4    |         | 1                 |      |
| TCGA-A2-A0T3-01A | BRCA | 236 | 148 | 147,09 | 7,3  |         | 0,76              |      |
| TCGA-25-1312-01A | OV   | 314 | 126 | 158,63 | 11,1 |         | 1                 |      |
| TCGA-GI-A2C9-01A | BRCA | 183 | 119 | 116,91 | 6,4  |         | 0,92              |      |

|                  |      |     |     |        |      |          |      |      |
|------------------|------|-----|-----|--------|------|----------|------|------|
| TCGA-GM-A5PV-01A | BRCA | 172 | 113 | 101,04 | 6,2  |          | 0,73 |      |
| TCGA-C5-A2M2-01A | CESC | 172 | 110 | 100,36 | 6,3  |          | 0,96 |      |
| TCGA-XF-A8HB-01A | BLCA | 203 | 107 | 108,45 | 7,6  |          | 0,89 |      |
| TCGA-57-1993-01A | OV   | 266 | 101 | 127,11 | 10,2 |          | 1    |      |
| TCGA-E2-A15F-01A | BRCA | 162 | 100 | 90,01  | 6,3  |          | 0,8  |      |
| TCGA-EY-A2OM-01A | UCEC | 159 | 156 | 156,15 | 2,3  |          | 0,81 |      |
| TCGA-CK-4951-01A | COAD | 169 | 155 | 155,31 | 2,9  | p.N1026S | 0,64 | 0,27 |
| TCGA-AP-A051-01A | UCEC | 141 | 136 | 136,50 | 2,4  | p.R549C  | 0,76 | 0,26 |
| TCGA-AA-3506-01A | COAD | 91  | 113 | 113,25 | 1    |          | NA   |      |
| TCGA-AZ-4614-01A | COAD | 106 | 103 | 102,64 | 2,3  |          | NA   |      |
| TCGA-FW-A3R5-06A | SKCM | 182 | 99  | 96,17  | 7,1  |          | 0,64 |      |
| TCGA-BS-A0UV-01A | UCEC | 91  | 98  | 98,44  | 1,7  | p.R957Q  | 0,84 | 0,29 |
| TCGA-AZ-4684-01A | COAD | 103 | 97  | 97,47  | 2,5  |          | NA   |      |
| TCGA-AA-A01Z-01A | COAD | 85  | 96  | 95,89  | 1,5  |          | NA   |      |
| TCGA-61-1918-01A | OV   | 239 | 95  | 113,71 | 9,4  |          | 0,9  |      |
| TCGA-CD-A4MJ-01A | STAD | 465 | 94  | 211,67 | 18   |          | 0,8  |      |
| TCGA-JY-A6F8-01A | ESCA | 412 | 94  | 190,95 | 16   |          | 1    |      |
| TCGA-AZ-4313-01A | COAD | 82  | 92  | 92,22  | 1,6  |          | NA   |      |
| TCGA-49-AARN-01A | LUAD | 109 | 91  | 90,77  | 3,2  |          | NA   |      |
| TCGA-DI-A1BU-01A | UCEC | 78  | 88  | 53,02  | 3,6  | p.V155A  | 0,79 | 0,24 |
| TCGA-N5-A4RT-01A | UCS  | 173 | 85  | 84,43  | 7,3  | p.D102A  | 1    | 0,7  |
| TCGA-F1-6875-01A | STAD | 281 | 85  | 120,85 | 11,4 |          | 0,92 |      |
| TCGA-CC-A7IG-01A | LIHC | 183 | 84  | 85,92  | 7,7  |          | 1    |      |
| TCGA-BR-7707-01A | STAD | 196 | 84  | 90,85  | 8,2  |          | 0,6  |      |
| TCGA-SY-A9G5-01A | BLCA | 90  | 81  | 52,18  | 4,3  | p.E902K  | 0,9  | 0,34 |
| TCGA-ZF-AA4R-01A | BLCA | 78  | 80  | 47,09  | 3,9  | p.E902G  | 0,74 | 0,53 |
| TCGA-25-2398-01A | OV   | 210 | 80  | 92,65  | 8,9  |          | 0,7  |      |
| TCGA-MX-A5UJ-01A | STAD | 347 | 77  | 138,73 | 14,2 |          | 0,45 |      |
| TCGA-W3-AA1V-06B | SKCM | 164 | 76  | 74,48  | 7,3  |          | 0,88 |      |
| TCGA-G2-AA3F-01A | BLCA | 134 | 75  | 63,21  | 6,2  | p.Q903P  | 0,9  | 0,11 |

|                  |      |     |    |        |      |          |      |      |
|------------------|------|-----|----|--------|------|----------|------|------|
| TCGA-GV-A3QI-01A | BLCA | 191 | 74 | 82,11  | 8,4  |          | 1    |      |
| TCGA-RU-A8FL-01A | CRC  | 156 | 73 | 70,82  | 7,1  |          | 0,87 |      |
| TCGA-61-1907-01A | OV   | 238 | 71 | 96,85  | 10,3 |          | 0,9  |      |
| TCGA-ZF-A9RN-01A | BLCA | 98  | 71 | 49,32  | 5    |          | 0,9  |      |
| TCGA-W3-AA10-06A | SKCM | 147 | 69 | 65,01  | 6,9  |          | 0,87 |      |
| TCGA-06-2569-01A | GBM  | 212 | 68 | 86,32  | 9,4  |          | 1    |      |
| TCGA-FD-A62P-01A | BLCA | 84  | 67 | 42,10  | 4,6  | p.E902K  | 0,5  | 0,25 |
| TCGA-86-A456-01A | LUAD | 85  | 66 | 41,23  | 4,7  |          | 0,38 |      |
| TCGA-GL-A59R-01A | KIRP | 60  | 64 | 35,88  | 3,8  | p.T916A  | 0,8  | 0,46 |
| TCGA-D9-A1X3-06A | SKCM | 194 | 64 | 77,45  | 8,9  |          | 1    |      |
| TCGA-4Z-AA7Q-01A | BLCA | 76  | 62 | 35,15  | 4,5  | p.E902K  | 0,5  | 0,45 |
| TCGA-WC-A882-01A | UVM  | 64  | 60 | 29,63  | 4,1  |          | NA   |      |
| TCGA-49-4488-01A | LUAD | 56  | 60 | 26,58  | 3,8  |          | 1    |      |
| TCGA-WR-A838-01A | OV   | 330 | 60 | 121,65 | 14,2 | p.R318L  | NA   | NA   |
| TCGA-86-8585-01A | LUAD | 73  | 59 | 31,93  | 4,5  |          | 0,6  |      |
| TCGA-AB-2932-03A | LAML | 131 | 59 | 52,35  | 6,7  |          | NA   |      |
| TCGA-LN-A49V-01A | ESCA | 403 | 59 | 165,81 | 17   |          | 1    |      |
| TCGA-AN-A0FY-01A | BRCA | 216 | 57 | 80,48  | 10   |          | 0,9  |      |
| TCGA-EE-A3AG-06A | SKCM | 173 | 56 | 64,54  | 8,4  |          | 0,95 |      |
| TCGA-61-2109-01A | OV   | 260 | 56 | 93,62  | 11,7 |          | 0,9  |      |
| TCGA-EK-A3GK-01A | CESC | 193 | 55 | 70,47  | 9,2  |          | 0,86 |      |
| TCGA-V4-A9EM-01A | UVM  | 132 | 54 | 50,37  | 6,9  |          | NA   |      |
| TCGA-GV-A3QF-01A | BLCA | 121 | 54 | 45,85  | 6,5  | p.E902K  | 0,8  | 0,34 |
| TCGA-BR-8678-01A | STAD | 348 | 54 | 123,99 | 15,1 | p.I1241M | 0,91 | NA   |
| TCGA-MA-AA41-01A | CESC | 90  | 52 | 33,68  | 5,4  | p.D470N  | 0,74 | 0,24 |
| TCGA-66-2773-01A | LUSC | 113 | 51 | 41,65  | 6,3  |          | 0,51 |      |
| TCGA-EW-A1PC-01B | BRCA | 218 | 51 | 76,78  | 10,3 |          | 0,96 |      |
| TCGA-ZH-A8Y8-01A | CHOL | 125 | 50 | 44,44  | 6,8  |          | 0,5  |      |
| TCGA-BR-8289-01A | STAD | 460 | 50 | 158,64 | 19,5 |          | 0,9  |      |
| TCGA-55-6981-01A | LUAD | 32  | 50 | 15,95  | 3,3  |          | 0,5  |      |

|                  |       |     |    |        |      |         |      |      |
|------------------|-------|-----|----|--------|------|---------|------|------|
| TCGA-G2-A2EF-01A | BLCA  | 193 | 49 | 66,91  | 9,4  |         | 0,8  |      |
| TCGA-W5-AA2Q-01A | CHOL  | 126 | 48 | 51,84  | 6,9  |         | 1    |      |
| TCGA-64-1680-01A | LUAD  | 59  | 47 | 20,36  | 4,4  |         | 0,92 |      |
| TCGA-ZF-A9RF-01A | BLCA  | 109 | 47 | 37,68  | 6,3  |         | 0,7  |      |
| TCGA-4Z-AA83-01A | BLCA  | 64  | 47 | 21,99  | 4,6  |         | 0,9  |      |
| TCGA-ZF-AA51-01A | BLCA  | 61  | 47 | 19,52  | 4,5  |         | 0,74 |      |
| TCGA-20-1684-01A | OV    | 391 | 47 | 137,67 | 17   |         | 0,83 |      |
| TCGA-AA-3660-01A | CRC   | 84  | 46 | 34,05  | 5,4  | p.R16G  | 0,67 | 0,66 |
| TCGA-ER-A19F-06A | SKCM  | 115 | 45 | 37,38  | 6,6  | p.Y898H | 0,95 | 0,23 |
| TCGA-55-1592-01A | LUAD  | 227 | 44 | 75,58  | 10,9 |         | 0,56 |      |
| TCGA-FA-A86F-01A | DLBC  | 158 | 43 | 51,12  | 8,3  |         | 0,3  |      |
| TCGA-18-3421-01A | LUSC  | 110 | 43 | 35,32  | 6,5  | p.K790N | 0,58 | 0,16 |
| TCGA-CL-4957-01A | READ  | 139 | 43 | 43,77  | 7,6  |         | 0,72 |      |
| TCGA-34-8455-01A | LUSC  | 94  | 43 | 28,92  | 5,9  | p.K111N | 0,76 | 0,28 |
| TCGA-AN-A04D-01A | BRCA  | 197 | 43 | 64,80  | 9,8  |         | 0,9  |      |
| TCGA-N5-A4R8-01A | UCS   | 146 | 42 | 46,97  | 7,9  |         | NA   |      |
| TCGA-A6-5665-01A | CRC   | 109 | 42 | 41,30  | 6,5  |         | 0,85 |      |
| TCGA-BF-A1PZ-01A | SKCM  | 175 | 42 | 55,66  | 9    | p.R614I | 0,95 | 0,1  |
| TCGA-BH-A0HY-01A | BRCA  | 114 | 42 | 35,39  | 6,7  | p.Y765C | 0,92 | 0,24 |
| TCGA-22-4605-01A | LUSC  | 148 | 41 | 46,54  | 8    | p.K700E | 0,5  | 0,16 |
| TCGA-WC-A888-01A | UVM   | 74  | 41 | 21,43  | 5,2  |         | NA   |      |
| TCGA-AB-2868-03A | LAML  | 95  | 41 | 51,51  | 6    | p.L833F | NA   | NA   |
| TCGA-EJ-5525-01A | PRAD  | 55  | 41 | 14,78  | 4,5  |         | 0,86 |      |
| TCGA-68-7756-01A | LUSC  | 226 | 40 | 73,39  | 11   |         | 0,6  |      |
| TCGA-56-A5DR-01A | LUSC  | 128 | 40 | 38,12  | 7,3  | p.Y765C | 0,8  | 0,21 |
| TCGA-G3-A7M9-01A | LIHC  | 133 | 40 | 40,10  | 7,5  |         | 0,9  |      |
| TCGA-EE-A29V-06A | SKCM  | 191 | 40 | 60,53  | 9,7  |         | 0,87 |      |
| TCGA-VQ-A924-01A | STAD  | 183 | 39 | 57,38  | 9,4  |         | 0,76 |      |
| TCGA-ZB-A96P-01A | THY M | 175 | 39 | 55,09  | 9,1  |         | NA   |      |
| TCGA-78-8655-01A | LUAD  | 67  | 37 | 15,75  | 5,1  |         | 0,8  |      |



|                  |          |     |    |        |      |         |      |      |
|------------------|----------|-----|----|--------|------|---------|------|------|
| TCGA-A2-A0EN-01A | BRCA     | 136 | 37 | 36,77  | 8,4  |         |      |      |
| TCGA-EE-A3AD-06A | SKCM     | 133 | 37 | 38,79  | 7,6  | p.P510Q | 0,87 | 0,12 |
| TCGA-GR-A4D4-01A | DLBC     | 138 | 37 | 39,27  | 7,8  |         | 0,7  |      |
| TCGA-AB-2866-03A | LAML     | 93  | 37 | 24,63  | 6,1  |         | NA   |      |
| TCGA-ZH-A8Y5-01A | CHOL     | 135 | 36 | 38,96  | 7,7  |         | 1    |      |
| TCGA-AJ-A3EK-01A | UCEC     | 103 | 36 | 28,28  | 6,5  | p.A368T | 0,93 | 0,28 |
| TCGA-EI-6508-01A | READ     | 132 | 36 | 37,57  | 7,6  |         | 0,95 |      |
| TCGA-ZF-AA5P-01A | BLCA     | 84  | 36 | 20,77  | 5,8  | p.L897R | 0,2  | NA   |
| TCGA-2G-AAL5-01A | TGCT     | 150 | 35 | 42,76  | 8,3  |         | 1    |      |
| TCGA-3H-AB3U-01A | MESO     | 131 | 35 | 36,08  | 7,6  |         | 1    |      |
| TCGA-ZB-A96L-01A | THY<br>M | 165 | 35 | 47,43  | 8,9  |         | 1    |      |
| TCGA-AJ-A3BD-01A | UCEC     | 91  | 35 | 22,10  | 6,1  |         | 0,9  |      |
| TCGA-5P-A9K2-01A | KIRP     | 42  | 33 | 4,66   | 4,3  | p.S461Y | 0,78 | 0,44 |
| TCGA-JY-A6FA-01A | ESCA     | 335 | 33 | 104,84 | 15,4 |         | 0,96 |      |
| TCGA-CM-5861-01A | CRC      | 47  | 33 | 5,74   | 4,5  |         | 0,95 |      |
| TCGA-NA-A4QX-01A | UCS      | 150 | 33 | 42,44  | 8,4  |         | 1    |      |
| TCGA-55-A4DF-01A | LUAD     | 110 | 32 | 27,24  | 6,9  |         | 0,66 |      |
| TCGA-4R-AA8I-01A | LIHC     | 54  | 32 | 7,67   | 4,8  | p.A433G | 0,88 | 0,43 |
| TCGA-60-2719-01A | LUSC     | 141 | 32 | 37,83  | 8,1  | p.N185S | 0,89 | 0,41 |
| TCGA-2G-AAGY-01A | TGCT     | 183 | 32 | 63,64  | 9,7  |         | 1    |      |
| TCGA-DX-A7EN-01A | SARC     | 138 | 31 | 37,00  | 8    | p.A710T | 0,82 | 0,06 |
| TCGA-CA-6717-01A | CRC      | 90  | 31 | 19,49  | 6,2  | p.E722K | 0,47 | 0,09 |
| TCGA-AB-2936-03A | LAML     | 119 | 31 | 28,98  | 7,3  |         | NA   |      |
| TCGA-VD-A8KJ-01A | UVM      | 140 | 31 | 37,11  | 8,1  |         | 1    |      |
| TCGA-GS-A9TQ-01A | DLBC     | 132 | 31 | 33,94  | 7,8  |         | 1    |      |
| TCGA-X7-A8D7-01A | THY<br>M | 118 | 30 | 37,38  | 7,3  |         | NA   |      |
| TCGA-G9-A9S7-01A | PRAD     | 110 | 30 | 25,82  | 7    |         | 0,74 |      |
| TCGA-L5-A8NN-01A | ESCA     | 300 | 30 | 90,53  | 14,2 |         | 0,7  |      |
| TCGA-DM-A0XF-01A | CRC      | 141 | 29 | 35,75  | 8,2  |         | 0,68 |      |
| TCGA-EX-A69L-01A | CESC     | 98  | 28 | 21,56  | 6,6  |         | 0,67 |      |

|                  |      |     |    |        |      |         |      |      |
|------------------|------|-----|----|--------|------|---------|------|------|
| TCGA-AB-2825-03B | LAML | 84  | 28 | 22,75  | 6,1  | p.T369N | NA   | 0,23 |
| TCGA-AB-2811-03B | LAML | 150 | 28 | 37,42  | 8,6  |         | NA   |      |
| TCGA-AB-2891-03A | LAML | 81  | 27 | 14,32  | 6    | p.L833F | NA   | 0    |
| TCGA-AB-2861-03B | LAML | 86  | 27 | 23,14  | 6,2  |         | NA   |      |
| TCGA-64-1676-01A | LUAD | 78  | 27 | 12,84  | 5,9  | p.A959V | 0,5  | 0,29 |
| TCGA-N8-A56S-01A | UCS  | 125 | 26 | 29,06  | 7,7  |         | NA   |      |
| TCGA-GC-A3BM-01A | BLCA | 111 | 26 | 32,00  | 7,2  | p.A176T | 0,92 | 0,3  |
| TCGA-BH-A1EV-01A | BRCA | 124 | 25 | 36,93  | 7,7  |         | 0,9  |      |
| TCGA-30-1718-01A | OV   | 306 | 25 | 90,52  | 14,6 |         | 0,7  |      |
| TCGA-36-1575-01A | OV   | 422 | 25 | 136,38 | 19   |         | 0,9  |      |
| TCGA-EA-A3HS-01A | CESC | 192 | 25 | 50,11  | 10,3 |         | 0,69 |      |
| TCGA-KQ-A41N-01A | BLCA | 99  | 24 | 19,09  | 6,8  | p.R736S | 1    | NA   |
| TCGA-D9-A1JW-06A | SKCM | 112 | 24 | 23,21  | 7,3  | p.M620I | 0,57 | 0,08 |
| TCGA-GM-A5PX-01A | BRCA | 75  | 24 | 10,52  | 5,9  |         | 0,67 |      |
| TCGA-P6-A5OG-01A | ACC  | 101 | 23 | 19,21  | 6,9  |         | 1    |      |
| TCGA-24-1463-01A | OV   | 394 | 23 | 140,67 | 18   |         | 0,83 |      |
| TCGA-55-A493-01A | LUAD | 77  | 23 | 10,01  | 6    |         | 0,2  |      |
| TCGA-WE-A8K5-06A | SKCM | 118 | 22 | 23,35  | 7,6  | p.P351S | 0,95 | 0,28 |
| TCGA-V4-A9EI-01A | UVM  | 139 | 22 | 30,73  | 8,4  |         | 1    |      |
| TCGA-06-0129-01A | GBM  | 202 | 21 | 51,60  | 10,8 |         | 1    |      |
| TCGA-95-7039-01A | LUAD | 46  | 21 | -1,23  | 4,9  |         | 0,9  |      |
| TCGA-24-1603-01A | OV   | 373 | 21 | 110,42 | 17,3 |         | 1    |      |
| TCGA-G3-AAV1-01A | LIHC | 69  | 21 | 4,94   | 5,8  | p.A277S | 1    | 0,39 |
| TCGA-G4-6586-01A | CRC  | 95  | 20 | 15,05  | 6,8  | p.R397C | 0,83 | 0,31 |
| TCGA-EP-A3JL-01A | LIHC | 87  | 20 | 12,28  | 6,5  | p.V576A | 0,8  | 0,26 |
| TCGA-UF-A7JS-01A | HNSC | 31  | 19 | -8,50  | 4,4  |         | 0,8  |      |
| TCGA-XM-A8RE-01A | THYM | 163 | 19 | 37,76  | 9,4  |         | NA   |      |
| TCGA-EO-A3AV-01A | UCEC | 72  | 18 | 5,93   | 6    | p.L502F | 0,2  | 0,26 |
| TCGA-69-7979-01A | LUAD | 138 | 18 | 27,89  | 8,5  | p.Q206R | 1    | 0,39 |
| TCGA-W5-AA31-01A | CHOL | 130 | 18 | 34,86  | 8,2  |         | 0,8  |      |

|                  |      |     |    |       |      |          |      |      |
|------------------|------|-----|----|-------|------|----------|------|------|
| TCGA-GS-A9TT-01A | DLBC | 159 | 18 | 34,94 | 9,3  |          | 1    |      |
| TCGA-ER-A19P-06A | SKCM | 129 | 17 | 24,69 | 8,2  | p.M620I  | 0,19 | 0,14 |
| TCGA-DD-AADC-01A | LIHC | 45  | 17 | 17,49 | 4    |          |      |      |
| TCGA-59-A5PD-01A | OV   | 348 | 17 | 98,72 | 16,5 |          | NA   |      |
| TCGA-50-5941-01A | LUAD | 52  | 17 | -1,92 | 5,3  |          | 0,3  |      |
| TCGA-OR-A5LG-01A | ACC  | 102 | 17 | 14,92 | 7,2  |          | 1    |      |
| TCGA-AJ-A3EL-01A | UCEC | 94  | 16 | 12,45 | 6,9  | p.R1297C | 0,91 | 0,49 |
| TCGA-E2-A1IO-01A | BRCA | 115 | 16 | 17,91 | 7,7  |          | 0,58 |      |
| TCGA-L6-A4EP-01A | THCA | 78  | 16 | 6,84  | 6,3  | p.M876L  | NA   | 0,35 |
| TCGA-C5-A8YR-01A | CESC | 70  | 16 | 3,81  | 6    |          | 0,92 |      |
| TCGA-DF-A2KU-01A | UCEC | 82  | 16 | 16,24 | 6,4  |          |      |      |
| TCGA-DQ-5631-01A | HNSC | 193 | 15 | 45,02 | 10,7 |          | 0,63 |      |
| TCGA-AB-2943-03A | LAML | 132 | 15 | 23,52 | 8,4  |          | 0,9  |      |
| TCGA-85-6560-01A | LUSC | 235 | 15 | 58,98 | 12,3 |          | 0,62 |      |
| TCGA-DD-AAEH-01A | LIHC | 50  | 15 | -4,43 | 5,3  | p.V1138L | 0,9  | 0,37 |
| TCGA-OR-A5J8-01A | ACC  | 97  | 14 | 10,58 | 7,1  | p.V184F  | NA   | 0,58 |
| TCGA-OR-A5LC-01A | ACC  | 44  | 14 | -7,94 | 5,1  |          | NA   |      |
| TCGA-L6-A4EQ-01A | THCA | 86  | 14 | 6,55  | 6,7  |          | NA   |      |
| TCGA-EO-A22U-01A | UCEC | 91  | 13 | 7,88  | 6,9  | p.F1220V | 0,84 | 0,23 |
| TCGA-B5-A5OE-01A | UCEC | 149 | 13 | 29,28 | 9,1  |          | 0,88 |      |
| TCGA-EE-A2MR-06A | SKCM | 149 | 13 | 29,36 | 9,1  |          | 0,3  |      |
| TCGA-50-8460-01A | LUAD | 77  | 13 | 4,03  | 6,4  |          | 0,49 |      |
| TCGA-E7-A85H-01A | BLCA | 111 | 12 | 14,07 | 7,7  |          | 0,91 |      |
| TCGA-DK-A1A3-01A | BLCA | 68  | 12 | 12,50 |      |          |      |      |
| TCGA-CU-A5W6-01A | BLCA | 97  | 12 | 9,53  | 7,2  | p.E902K  | 0,8  | 0,33 |
| TCGA-LK-A4O5-01A | MESO | 144 | 11 | 24,98 | 9    |          | 1    |      |
| TCGA-A4-A6HP-01A | KIRP | 83  | 11 | 3,93  | 6,7  | p.K121M  | 0,77 | 0,35 |
| TCGA-DA-A1HV-06A | SKCM | 88  | 10 | 5,17  | 6,9  | p.H1256Y | 0,83 | 0,5  |
| TCGA-D3-A8GM-06A | SKCM | 117 | 10 | 14,80 | 8    | p.D564E  | 0,73 | 0,61 |
| TCGA-FD-A3B5-01A | BLCA | 109 | 10 | 12,03 | 7,7  |          | 1    |      |

|                  |      |     |    |        |      |          |      |      |
|------------------|------|-----|----|--------|------|----------|------|------|
| TCGA-VD-AA8T-01A | UVM  | 135 | 10 | 20,67  | 8,7  |          | 1    |      |
| TCGA-IR-A3LA-01A | CESC | 124 | 9  | 17,61  | 8,3  |          | 0,9  |      |
| TCGA-AB-2899-03A | LAML | 63  | 9  | -3,13  | 6    |          | NA   |      |
| TCGA-DD-AAE3-01A | LIHC | 39  | 9  | -11,99 | 5,1  | p.D321V  | 1    | 0,45 |
| TCGA-OR-A5JB-01A | ACC  | 102 | 9  | 9,55   | 7,5  | p.M1231T | 1    | 0,35 |
| TCGA-WK-A8XX-01A | SARC | 146 | 8  | 23,06  | 9,2  |          | 0,93 |      |
| TCGA-52-7812-01A | LUSC | 85  | 7  | 2,83   | 6,9  | p.C965S  | 0,68 | 0,28 |
| TCGA-D3-A2JL-06A | SKCM | 98  | 7  | 7,29   | 7,4  | p.D894G  | 0,54 | 0,32 |
| TCGA-VQ-A8P2-01A | STAD | 280 | 7  | 69,56  | 14,3 | p.V917M  | 0,88 | 0,39 |
| TCGA-V1-A9O5-01A | PRAD | 103 | 7  | 17,54  | 7,6  |          | 0,82 |      |
| TCGA-FD-A6TC-01A | BLCA | 116 | 7  | 12,38  | 8,1  |          | 0,74 |      |
| TCGA-55-7283-01A | LUAD | 79  | 7  | 0,68   | 6,7  |          | 0,35 |      |
| TCGA-MP-A4T4-01A | LUAD | 84  | 6  | 1,94   | 6,9  |          | 0,2  |      |
| TCGA-BL-A5ZZ-01A | BLCA | 76  | 6  | -0,43  | 6,6  | p.G693D  | 0,4  | 0,34 |
| TCGA-3N-A9WC-06A | SKCM | 76  | 6  | -1,73  | 6,6  |          | 0,57 |      |
| TCGA-V4-A9F1-01A | UVM  | 134 | 6  | 18,85  | 8,8  |          | 1    |      |
| TCGA-FX-A8OO-01A | SARC | 139 | 6  | 19,79  | 9    |          | 0,83 |      |
| TCGA-Q1-A73R-01A | CESC | 191 | 5  | 37,48  | 11   |          | 0,35 |      |
| TCGA-AB-2843-03A | LAML | 51  | 5  | -11,12 | 5,7  |          | NA   |      |
| TCGA-06-5416-01A | GBM  | 146 | 5  | 21,42  | 9,3  | p.E862K  | 1    | 0,23 |
| TCGA-55-7907-01A | LUAD | 35  | 5  | -16,23 | 5,1  |          | 0,66 |      |
| TCGA-AJ-A3NE-01A | UCEC | 95  | 5  | 4,70   | 7,9  |          |      |      |
| TCGA-BK-A6W3-01A | UCEC | 130 | 5  | 16,89  | 8,7  | p.C1035G | 0,78 | 0,36 |
| TCGA-DM-A1HB-01A | CRC  | 106 | 5  | 7,20   | 7,8  | p.P258L  | 0,86 | 0,39 |
| TCGA-E7-A6ME-01A | BLCA | 92  | 4  | 3,18   | 7,3  |          | 0,92 |      |
| TCGA-BT-A3PJ-01A | BLCA | 113 | 4  | 9,22   | 8,1  |          | 0,74 |      |
| TCGA-GR-A4D5-01A | DLBC | 142 | 4  | 19,60  | 9,2  |          | 0,3  |      |
| TCGA-30-1855-01A | OV   | 348 | 4  | 204,43 | 17   |          | 0,7  |      |
| TCGA-EE-A183-06A | SKCM | 155 | 4  | 24,16  | 9,7  | p.R736S  | 0,35 | 0,11 |
| TCGA-51-4081-01A | LUSC | 81  | 3  | 6,84   | 6,9  |          | 1    |      |

|                  |      |     |    |        |      |         |      |      |
|------------------|------|-----|----|--------|------|---------|------|------|
| TCGA-QS-A5YQ-01A | UCEC | 57  | 3  | -9,67  | 6    | p.R957Q | 0,93 | 0,42 |
| TCGA-05-4422-01A | LUAD | 210 | 3  | 42,60  | 11,8 |         | 0,71 |      |
| TCGA-EO-A3AY-01A | UCEC | 67  | 3  | -6,45  | 6,4  | p.R315Q | 0,77 | 0,36 |
| TCGA-AB-2810-03A | LAML | 56  | 2  | -10,76 | 6    |         | NA   |      |
| TCGA-A5-A2K5-01A | UCEC | 82  | 2  | -2,41  | 7    | p.K573T | NA   | 0,53 |
| TCGA-66-2777-01A | LUSC | 82  | 2  | -1,67  | 7    |         | 0,48 |      |
| TCGA-AB-2948-03A | LAML | 124 | 2  | 11,67  | 8,6  |         | NA   |      |
| TCGA-38-4630-01A | LUAD | 219 | 1  | 44,98  | 12,2 |         | 0,92 |      |
| TCGA-DB-A75M-01A | LGG  | 84  | 1  | -1,09  | 7,1  | p.D835V | NA   | 0,38 |
| TCGA-49-6744-01A | LUAD | 68  | 1  | 0,30   | 6,5  |         | 0,37 |      |
| TCGA-SQ-A6I4-01A | PCPG | 65  | 1  | -1,09  | 6,4  |         | 0,7  |      |
| TCGA-AC-A5XS-01A | BRCA | 80  | 0  | -4,13  | 7    |         | NA   |      |
| TCGA-C8-A134-01A | BRCA | 209 | -1 | 39,83  | 11,9 |         | 0,7  |      |
| TCGA-JW-A5VL-01A | CESC | 100 | -1 | 1,67   | 7,8  |         | 0,8  |      |
| TCGA-PE-A5DE-01A | BRCA | 81  | -2 | -5,29  | 7,1  |         | 0,56 |      |
| TCGA-KN-8427-01A | KICH | 117 | -3 | 17,01  | 8,5  |         | 1    |      |
| TCGA-CM-5863-01A | CRC  | 72  | -3 | -9,26  | 6,8  | p.V727L | 0,24 | 0,39 |
| TCGA-AB-2996-03A | LAML | 72  | -3 | -8,43  | 6,8  |         | NA   |      |
| TCGA-23-1123-01A | OV   | 370 | -3 | 93,15  | 18,1 |         | 1    |      |
| TCGA-NH-A5IV-01A | CRC  | 108 | -4 | 3,63   | 8,2  | p.G922D | 0,69 | 0,35 |
| TCGA-HU-A4H0-01A | STAD | 398 | -4 | 102,13 | 19,2 |         | 0,46 |      |
| TCGA-68-7757-01B | LUSC | 81  | -4 | -7,27  | 7,2  |         | 0,38 |      |
| TCGA-G4-6307-01A | CRC  | 144 | -5 | 14,31  | 9,6  |         | 0,88 |      |
| TCGA-S6-A8JY-01A | TGCT | 159 | -6 | 18,64  | 10,2 |         | 1    |      |
| TCGA-E6-A8L9-01A | UCEC | 90  | -6 | -3,79  | 7,6  |         | 0,8  |      |
| TCGA-AB-2865-03A | LAML | 58  | -6 | -15,35 | 6,4  |         | NA   |      |
| TCGA-43-6143-01A | LUSC | 240 | -7 | 62,53  | 13,3 |         | 0,89 |      |
| TCGA-D3-A1Q3-06A | SKCM | 179 | -7 | 25,36  | 11   | p.R736S | 0,61 | 0,08 |
| TCGA-D7-6525-01A | STAD | 369 | -7 | 91,57  | 18,2 |         | 0,76 |      |
| TCGA-D3-A3CE-06A | SKCM | 123 | -7 | 5,46   | 8,9  |         | 0,8  |      |

|                  |      |     |     |        |      |          |      |      |
|------------------|------|-----|-----|--------|------|----------|------|------|
| TCGA-HM-A4S6-01A | CESC | 91  | -8  | -5,14  | 7,7  | p.D138N  | 0,5  | 0,3  |
| TCGA-E1-A7YU-01A | LGG  | 67  | -8  | -13,23 | 6,8  | p.V591E  | NA   | 0,27 |
| TCGA-FR-A726-01A | SKCM | 159 | -8  | 17,13  | 10,3 | p.S229F  | 0,7  | 0,27 |
| TCGA-B5-A3FC-01A | UCEC | 61  | -9  | -16,89 | 6,6  | p.V977A  | 0,93 | 0,43 |
| TCGA-BR-8372-01A | STAD | 359 | -9  | 85,25  | 17,9 |          | 0,69 |      |
| TCGA-D6-A74Q-01A | HNSC | 108 | -9  | -0,88  | 8,4  |          | 0,67 |      |
| TCGA-AB-2941-03A | LAML | 129 | -9  | 7,18   | 9,2  |          | 0,5  |      |
| TCGA-AB-3002-03A | LAML | 68  | -10 | -13,98 | 6,9  |          | NA   |      |
| TCGA-US-A776-01A | PAAD | 89  | -10 | -7,32  | 7,7  | p.N763S  | 0,8  | 0,34 |
| TCGA-EE-A2GB-06A | SKCM | 175 | -11 | 20,76  | 11   |          | 0,92 |      |
| TCGA-EB-A3Y6-01A | SKCM | 103 | -12 | -3,83  | 8,3  | p.P274L  | 0,8  | 0,3  |
| TCGA-85-A4CL-01A | LUSC | 103 | -12 | -3,98  | 8,3  |          | 0,9  |      |
| TCGA-DU-7008-01A | LGG  | 153 | -12 | 13,42  | 10,2 | p.S541P  | 1    | 0,53 |
| TCGA-XE-A8H5-01A | TGCT | 153 | -12 | 12,89  | 10,2 |          | 1    |      |
| TCGA-KN-8424-01A | KICH | 116 | -12 | 11,17  | 8,8  |          | NA   |      |
| TCGA-EB-A4IS-01A | SKCM | 108 | -12 | -2,10  | 8,5  |          | 0,51 |      |
| TCGA-AB-2847-03A | LAML | 81  | -12 | -11,63 | 7,5  |          | NA   |      |
| TCGA-46-6025-01A | LUSC | 213 | -12 | 34,19  | 12,5 |          | 0,7  |      |
| TCGA-SG-A6Z4-01A | SARC | 157 | -13 | 14,43  | 10,4 |          | 0,92 |      |
| TCGA-DU-7302-01A | LGG  | 67  | -13 | -16,61 | 7    |          | NA   |      |
| TCGA-ZJ-AAXU-01A | CESC | 148 | -14 | 9,30   | 10,1 |          | 0,62 |      |
| TCGA-Q9-A6FU-01A | ESCA | 383 | -14 | 113,52 | 19   |          | 0,8  |      |
| TCGA-78-7145-01A | LUAD | 49  | -15 | -24,06 | 6,4  |          | 0,9  |      |
| TCGA-AB-2990-03B | LAML | 107 | -15 | -4,16  | 8,6  |          | NA   |      |
| TCGA-24-1424-01A | OV   | 379 | -15 | 89,46  | 18,9 |          | 0,9  |      |
| TCGA-DM-A1DA-01A | CRC  | 146 | -16 | 8,43   | 10,1 |          | 0,65 |      |
| TCGA-EE-A181-06A | SKCM | 109 | -16 | -4,45  | 8,7  | p.P812S  | 0,6  | 0,29 |
| TCGA-22-5480-01A | LUSC | 172 | -16 | 16,01  | 11,1 | p.A1047S | 0,76 | 0,28 |
| TCGA-P6-A5OF-01A | ACC  | 111 | -17 | -4,30  | 8,8  |          | NA   |      |
| TCGA-CX-7219-01A | HNSC | 113 | -17 | -3,89  | 8,9  |          | 0,49 |      |

|                  |      |     |     |        |      |          |      |      |
|------------------|------|-----|-----|--------|------|----------|------|------|
| TCGA-AX-A2HH-01A | UCEC | 102 | -18 | -8,56  | 8,5  |          | 0,84 |      |
| TCGA-CV-6948-01A | HNSC | 189 | -18 | 22,32  | 11,8 |          | 0,85 |      |
| TCGA-D9-A4Z2-01A | SKCM | 120 | -18 | -1,53  | 9,2  |          | 0,89 |      |
| TCGA-AC-A23H-01A | BRCA | 141 | -18 | 16,80  | 10   | p.L464F  | 0,74 | 0,33 |
| TCGA-CZ-5465-01A | KIRC | 201 | -19 | 39,67  | 12,3 |          | 0,58 |      |
| TCGA-L5-A40F-01A | ESCA | 404 | -20 | 102,24 | 20   |          | 0,9  |      |
| TCGA-SL-A6JA-01A | UCEC | 87  | -20 | -14,13 | 8    |          | 0,93 |      |
| TCGA-EJ-5511-01A | PRAD | 167 | -21 | 11,92  | 11,1 |          | 0,8  |      |
| TCGA-FS-A4F5-06A | SKCM | 122 | -22 | -4,32  | 9,4  | p.R1297C | 0,95 | 0,41 |
| TCGA-G2-A2EO-01A | BLCA | 76  | -23 | -19,81 | 7,7  |          | 0,6  |      |
| TCGA-KN-8430-01A | KICH | 89  | -23 | -6,14  | 8,2  |          | 1    |      |
| TCGA-UZ-A9PS-01A | KIRP | 81  | -23 | -9,30  | 7,9  | p.T935K  | 0,85 | 0,21 |
| TCGA-HU-8608-01A | STAD | 260 | -24 | 41,66  | 14,7 |          | 0,46 |      |
| TCGA-AG-3902-01A | READ | 149 | -24 | 4,32   | 10,5 |          | 1    |      |
| TCGA-GR-7351-01A | DLBC | 59  | -24 | -26,53 | 7,1  | p.T434A  | NA   | 0,28 |
| TCGA-IB-7651-01A | PAAD | 129 | -24 | -24,36 | 11,8 |          |      |      |
| TCGA-DX-A6YV-01A | SARC | 56  | -24 | -28,09 | 7    | p.Q1248K | 0,92 | 0,2  |
| TCGA-55-7903-01A | LUAD | 92  | -25 | -16,83 | 8,4  |          | 0,72 |      |
| TCGA-DA-A1I1-06A | SKCM | 95  | -27 | -16,98 | 8,6  |          | 0,67 |      |
| TCGA-BH-A1F0-01A | BRCA | 216 | -28 | 40,15  | 13,2 |          | 0,92 |      |
| TCGA-E8-A433-01A | THCA | 76  | -28 | -23,99 | 7,9  | p.T7I    | NA   | 0,31 |
| TCGA-DX-A3LU-01A | SARC | 60  | -28 | -30,00 | 7,3  | p.F746V  | 0,73 | 0,09 |
| TCGA-D8-A1JA-01A | BRCA | 122 | -29 | -29,01 | 11,7 |          |      |      |
| TCGA-KN-8423-01A | KICH | 125 | -29 | 4,03   | 9,8  |          | 1    |      |
| TCGA-DU-6407-01A | LGG  | 74  | -30 | -16,30 | 7,9  | p.L464F  | 1    | 0,16 |
| TCGA-GN-A26C-01A | SKCM | 105 | -31 | -14,82 | 9,1  | p.M620I  | 0,5  | 0,1  |
| TCGA-DM-A1DB-01A | CRC  | 144 | -31 | -2,19  | 10,6 |          | 0,95 |      |
| TCGA-AL-3472-01A | KIRP | 99  | -31 | -18,22 | 8,9  | p.V1169I | 0,88 | 0,4  |
| TCGA-D6-6516-01A | HNSC | 88  | -32 | -21,26 | 8,5  |          | 0,69 |      |
| TCGA-DW-7834-01A | KIRP | 77  | -32 | -25,32 | 8,1  | p.T267N  | 0,92 | 0,35 |

|                  |      |     |     |        |      |             |      |      |
|------------------|------|-----|-----|--------|------|-------------|------|------|
| TCGA-KN-8426-01A | KICH | 132 | -33 | 4,57   | 10,2 |             | NA   |      |
| TCGA-33-4532-01A | LUSC | 145 | -33 | -3,28  | 10,7 | p.A86T      | 1    | 0,34 |
| TCGA-HZ-7924-01A | PAAD | 155 | -36 | -1,67  | 11,2 |             | 0,93 |      |
| TCGA-B0-4816-01A | KIRC | 139 | -36 | -8,13  | 10,6 | p.D1175Y    | 0,5  | NA   |
| TCGA-99-7458-01A | LUAD | 99  | -37 | -21,22 | 9,1  |             | 0,4  |      |
| TCGA-V5-A7RB-01A | ESCA | 281 | -37 | 40,24  | 16   | p.T1113A    | 0,77 | 0,34 |
| TCGA-IB-8127-01A | PAAD | 170 | -37 | 3,51   | 11,8 |             | 0,9  |      |
| TCGA-CC-A1HT-01A | LIHC | 154 | -37 | -2,35  | 11,2 |             | 0,5  |      |
| TCGA-FJ-A871-01A | BLCA | 100 | -38 | -22,77 | 9,2  | p.N185S     | 0,78 | 0,38 |
| TCGA-CV-6962-01A | HNSC | 81  | -39 | -18,99 | 8,5  |             | 0,85 |      |
| TCGA-AB-2959-03A | LAML | 73  | -42 | -33,75 | 8,3  |             | NA   |      |
| TCGA-46-6026-01A | LUSC | 205 | -42 | 12,09  | 13,3 |             | 0,9  |      |
| TCGA-AH-6549-01A | READ | 131 | -44 | -15,23 | 10,6 |             | NA   |      |
| TCGA-AT-A5NU-01A | KIRP | 181 | -44 | 1,63   | 12,5 |             | 0,76 |      |
| TCGA-34-5239-01A | LUSC | 210 | -45 | 11,35  | 13,6 |             | 0,8  |      |
| TCGA-HT-8104-01A | LGG  | 96  | -45 | -27,52 | 9,3  | p.I665F     | 1    | 0,16 |
| TCGA-CN-6023-01A | HNSC | 198 | -46 | 6,78   | 13,2 |             | 0,41 |      |
| TCGA-D7-5578-01A | STAD | 185 | -48 | 0,47   | 12,8 |             | 0,7  |      |
| TCGA-AB-2933-03A | LAML | 58  | -49 | -43,10 | 8    |             | NA   |      |
| TCGA-44-7671-01A | LUAD | 113 | -49 | -24,70 | 10,1 |             | 0,74 |      |
| TCGA-AR-A251-01A | BRCA | 216 | -49 | 10,75  | 14   |             | 0,9  |      |
| TCGA-32-2634-01A | GBM  | 214 | -51 | 9,21   | 14   |             | 1    |      |
| TCGA-SW-A7EA-01A | STAD | 174 | -51 | -5,40  | 12,5 |             | 0,64 |      |
| TCGA-E2-A1B0-01A | BRCA | 213 | -52 | 8,33   | 14   |             | 0,66 |      |
| TCGA-AB-2912-03A | LAML | 67  | -53 | -43,63 | 8,5  | Splice_Site | 1    | 0,12 |
| TCGA-CV-6950-01A | HNSC | 132 | -54 | -22,30 | 11   | p.Y101C     | 0,62 | 0,62 |
| TCGA-E9-A1R5-01A | BRCA | 100 | -54 | -32,19 | 9,8  | p.T1096K    | 0,79 | 0,31 |
| TCGA-A8-A09I-01A | BRCA | 210 | -55 | 4,45   | 14   |             | 0,86 |      |
| TCGA-AB-2826-03A | LAML | 48  | -56 | -51,36 | 7,9  |             | NA   |      |
| TCGA-BQ-7061-01A | KIRP | 127 | -56 | -11,73 | 10,9 |             | 0,75 |      |



|                  |      |     |     |        |      |          |      |      |
|------------------|------|-----|-----|--------|------|----------|------|------|
| TCGA-A6-6648-01A | CRC  | 145 | -57 | -18,63 | 11,6 |          |      | 0,51 |
| TCGA-A4-A5Y1-01A | KIRP | 174 | -59 | -11,11 | 12,8 |          |      | 0,89 |
| TCGA-BR-A4PE-01A | STAD | 337 | -60 | 217,64 | 19   |          |      | 0,9  |
| TCGA-69-8255-01A | LUAD | 207 | -61 | 0,03   | 14,1 |          |      | 0,58 |
| TCGA-EE-A2GE-06A | SKCM | 93  | -61 | -39,69 | 9,8  |          |      | 0,3  |
| TCGA-US-A77E-01A | PAAD | 78  | -63 | -45,71 | 9,3  |          |      | 0,42 |
| TCGA-23-1032-01A | OV   | 387 | -63 | 85,24  | 21   |          |      | 0,86 |
| TCGA-DD-AADV-01A | LIHC | 87  | -64 | -43,61 | 9,7  | p.A711V  | 1    | 0,45 |
| TCGA-12-3653-01A | GBM  | 92  | -65 | -42,65 | 9,9  | p.W388G  | NA   | 0,22 |
| TCGA-AB-2917-03A | LAML | 68  | -65 | -49,92 | 9    |          | NA   |      |
| TCGA-DU-8168-01A | LGG  | 146 | -66 | -24,98 | 12   |          | 1    |      |
| TCGA-06-0745-01A | GBM  | 230 | -67 | 3,90   | 15,2 |          | 1    |      |
| TCGA-AB-2975-03A | LAML | 54  | -68 | -57,93 | 8,6  |          | NA   |      |
| TCGA-DU-6392-01A | LGG  | 120 | -68 | -35,72 | 11,1 | p.F814L  | 0,7  | 0,11 |
| TCGA-H2-A2K9-01A | THCA | 201 | -69 | 9,00   | 14,2 |          | 0,3  |      |
| TCGA-EJ-7791-01A | PRAD | 161 | -70 | -21,13 | 12,7 |          | 0,94 |      |
| TCGA-HZ-8519-01A | PAAD | 152 | -73 | -28,15 | 12,5 |          | 0,76 |      |
| TCGA-CG-4460-01A | STAD | 99  | -74 | -45,87 | 10,5 | p.V1169I | 0,79 | 0,3  |
| TCGA-49-4505-01A | LUAD | 128 | -74 | -35,08 | 11,6 |          | 0,54 |      |
| TCGA-EL-A3ZQ-01A | THCA | 46  | -76 | -55,60 | 8,6  |          | NA   |      |
| TCGA-E2-A1B1-01A | BRCA | 212 | -77 | -8,92  | 14,9 |          | 0,35 |      |
| TCGA-09-2044-01B | OV   | 248 | -78 | 3,34   | 16,3 | p.Q737K  | 0,89 | 0,11 |
| TCGA-34-5929-01A | LUSC | 215 | -79 | -10,26 | 15,1 |          | 0,92 |      |
| TCGA-KP-A3W1-01A | UCEC | 66  | -80 | -62,16 | 9,5  |          | 0,9  |      |
| TCGA-A6-6780-01A | CRC  | 91  | -82 | -41,27 | 10,5 | p.L575P  | 0,68 | 0,05 |
| TCGA-HZ-8637-01A | PAAD | 122 | -85 | -45,00 | 11,8 |          | 0,1  |      |
| TCGA-BR-7851-01A | STAD | 247 | -87 | 16,26  | 16,6 | p.Q518R  | 0,72 | 0,22 |
| TCGA-XF-AAN3-01A | BLCA | 186 | -87 | -24,63 | 14,3 | p.E860K  | 0,37 | 0,35 |
| TCGA-C5-A1BJ-01A | CESC | 198 | -88 | -21,69 | 14,8 |          | 0,41 |      |
| TCGA-CG-5721-01A | STAD | 206 | -91 | -2,14  | 15,2 | p.L544P  | 0,93 | 0,24 |

|                  |      |     |      |         |      |         |      |      |
|------------------|------|-----|------|---------|------|---------|------|------|
| TCGA-L5-A43C-01A | ESCA | 210 | -103 | -7,82   | 15,8 | p.Q669K | 0,4  | 0,06 |
| TCGA-IB-7654-01A | PAAD | 99  | -103 | -64,58  | 11,6 |         | 0,52 |      |
| TCGA-CH-5767-01A | PRAD | 101 | -114 | -57,10  | 12,1 |         | 0,92 |      |
| TCGA-BA-4078-01A | HNSC | 182 | -117 | -45,43  | 15,3 |         | 0,88 |      |
| TCGA-VQ-A91S-01A | STAD | 276 | -121 | -16,40  | 19   | p.P327R | NA   | 0,37 |
| TCGA-QR-A71P-01A | PCPG | 117 | -122 | -70,49  | 13   |         | 1    |      |
| TCGA-A6-3809-01A | CRC  | 51  | -132 | -87,73  | 10,9 | p.S49I  | 0,87 | 0,27 |
| TCGA-QT-A5XO-01A | PCPG | 122 | -143 | -82,95  | 14   |         | 1    |      |
| TCGA-D8-A27V-01A | BRCA | 140 | -146 | -80,10  | 14,8 | p.S455X | 0,8  | NA   |
| TCGA-DD-AACK-01A | LIHC | 131 | -158 | -90,63  | 14,9 |         | 0,92 |      |
| TCGA-FE-A233-01A | THCA | 196 | -169 | -75,12  | 17,8 |         | NA   |      |
| TCGA-BL-A0C8-01A | BLCA | 101 | -233 | -129,74 | 16,6 | p.E902K | 0,9  | 0,71 |
| TCGA-24-1428-01A | OV   | 386 | -389 | -154,19 | 33,3 |         | 0,73 |      |

Supplementary Table 4. I-TASSER C-scores of the predicted structures of wild-type and mutant SF3B1. C-score is a confidence score for estimating the quality of predicted models by I-TASSER. C-score is typically in the range of [-5,2], where a C-score of higher value signifies a model with a high confidence. The cluster density is defined as the number of structure decoys at a unit of space in the SPICKER cluster. A higher cluster density means the structure occurs more often in the simulation trajectory and therefore signifies a better-quality model.

|             | C-score | No.of decoys | Cluster density |
|-------------|---------|--------------|-----------------|
| SF3B1_WT    | -1.81   | 252          | 0.0266          |
| SF3B1_R625H | -2.12   | 396          | 0.0256          |
| SF3B1_I665F | -1.83   | 248          | 0.0252          |
| SF3B1_K666T | -2.15   | 364          | 0.0246          |
| SF3B1_K700E | -1.41   | 308          | 0.0430          |
| SF3B1_K741N | -1.33   | 347          | 0.0448          |
| SF3B1_K741E | -1.42   | 332          | 0.0380          |
| SF3B1_K741Q | -1.49   | 298          | 0.0352          |

Supplementary Table 5. The estimated local accuracy and the B-factor of I-TASSER predictions of wild-type and mutant SF3B1 structures.

| #RES | SF3B1_WT |    |      |       |       | SF3B1_R625H |    |      |       |       | SF3B1_I665F |    |      |       |       | SF3B1_K666T |    |      |       |       | SF3B1_K700E |    |      |       |       | SF3B1_K741E |    |      |       |       | SF3B1_K741N |    |      |       |       | SF3B1_K741Q |    |      |       |       |
|------|----------|----|------|-------|-------|-------------|----|------|-------|-------|-------------|----|------|-------|-------|-------------|----|------|-------|-------|-------------|----|------|-------|-------|-------------|----|------|-------|-------|-------------|----|------|-------|-------|-------------|----|------|-------|-------|
|      | SS       | SA | COV  | BFP   | RSQ   | SS          | SA | COV  | BFP   | RSQ   | SS          | SA | COV  | BFP   | RSQ   | SS          | SA | COV  | BFP   | RSQ   | SS          | SA | COV  | BFP   | RSQ   | SS          | SA | COV  | BFP   | RSQ   | SS          | SA | COV  | BFP   | RSQ   | SS          | SA | COV  | BFP   | RSQ   |
| 1    | C        | E  | 0.08 | 2.40  | 21.12 | C           | E  | 0.07 | 2.45  | 27.59 | C           | E  | 0.08 | 2.44  | 23.44 | C           | E  | 0.07 | 2.47  | 17.08 | C           | E  | 0.08 | 2.41  | 24.40 | C           | E  | 0.08 | 2.43  | 37.88 | C           | E  | 0.07 | 2.39  | 19.01 | C           | E  | 0.08 | 2.42  | 27.45 |
| 2    | C        | E  | 0.08 | 2.05  | 20.47 | C           | E  | 0.09 | 2.01  | 26.19 | C           | E  | 0.08 | 2.04  | 22.76 | C           | E  | 0.09 | 2.02  | 16.53 | C           | E  | 0.08 | 2.05  | 23.00 | C           | E  | 0.08 | 2.06  | 36.39 | C           | E  | 0.08 | 2.02  | 17.40 | C           | E  | 0.08 | 2.02  | 25.81 |
| 3    | C        | E  | 0.07 | 1.27  | 19.59 | C           | E  | 0.07 | 0.85  | 24.92 | C           | E  | 0.06 | 1.10  | 21.85 | C           | E  | 0.07 | 0.86  | 16.55 | C           | E  | 0.06 | 1.29  | 21.32 | C           | E  | 0.07 | 1.29  | 34.47 | C           | E  | 0.05 | 1.10  | 17.33 | C           | E  | 0.06 | 1.03  | 24.70 |
| 4    | C        | E  | 0.06 | 0.43  | 18.67 | C           | E  | 0.08 | 0.38  | 23.95 | C           | E  | 0.06 | 0.47  | 22.58 | C           | E  | 0.07 | 0.45  | 17.06 | C           | E  | 0.05 | 0.41  | 20.44 | C           | E  | 0.06 | 0.47  | 33.17 | C           | E  | 0.06 | 0.49  | 16.13 | C           | E  | 0.05 | 0.38  | 24.08 |
| 5    | C        | E  | 0.05 | 0.37  | 18.09 | C           | E  | 0.07 | 0.25  | 23.59 | C           | E  | 0.06 | 0.38  | 22.89 | C           | E  | 0.06 | 0.32  | 16.94 | C           | E  | 0.05 | 0.37  | 19.91 | C           | E  | 0.05 | 0.38  | 32.40 | C           | E  | 0.06 | 0.39  | 15.44 | C           | E  | 0.05 | 0.31  | 22.75 |
| 6    | C        | E  | 0.08 | 0.80  | 17.44 | C           | E  | 0.07 | 0.22  | 22.30 | C           | E  | 0.07 | 0.70  | 21.76 | C           | E  | 0.06 | 0.25  | 16.85 | C           | E  | 0.07 | 0.80  | 18.69 | C           | E  | 0.08 | 0.81  | 31.18 | C           | E  | 0.06 | 0.47  | 15.03 | C           | E  | 0.08 | 0.66  | 20.66 |
| 7    | C        | E  | 0.08 | 0.81  | 16.30 | C           | E  | 0.07 | 0.17  | 21.06 | C           | E  | 0.08 | 0.81  | 21.50 | C           | E  | 0.07 | 0.25  | 17.45 | C           | E  | 0.08 | 0.79  | 17.51 | C           | E  | 0.08 | 0.84  | 29.14 | C           | E  | 0.07 | 0.60  | 14.13 | C           | E  | 0.08 | 0.72  | 19.88 |
| 8    | H        | E  | 0.08 | 0.69  | 15.25 | H           | E  | 0.08 | 0.18  | 20.57 | H           | E  | 0.08 | 0.74  | 22.58 | H           | E  | 0.08 | 0.24  | 17.84 | H           | E  | 0.08 | 0.67  | 16.97 | H           | E  | 0.08 | 0.76  | 27.88 | H           | E  | 0.07 | 0.68  | 13.97 | H           | E  | 0.08 | 0.65  | 19.13 |
| 9    | H        | E  | 0.09 | 0.71  | 14.77 | H           | E  | 0.11 | 0.51  | 19.87 | H           | E  | 0.10 | 0.72  | 22.43 | H           | E  | 0.10 | 0.47  | 17.62 | H           | E  | 0.09 | 0.75  | 16.09 | H           | E  | 0.09 | 0.76  | 27.52 | H           | E  | 0.09 | 0.91  | 15.46 | H           | E  | 0.08 | 0.68  | 17.91 |
| 10   | H        | E  | 0.09 | 0.53  | 14.31 | H           | E  | 0.11 | 0.48  | 19.04 | H           | E  | 0.10 | 0.69  | 21.04 | H           | E  | 0.10 | 0.55  | 17.94 | H           | E  | 0.09 | 0.54  | 14.88 | H           | E  | 0.09 | 0.56  | 25.79 | H           | E  | 0.09 | 0.88  | 15.12 | H           | E  | 0.08 | 0.69  | 16.47 |
| 11   | H        | B  | 0.09 | 0.23  | 13.79 | H           | B  | 0.11 | -0.13 | 18.25 | H           | B  | 0.10 | 0.42  | 21.38 | H           | B  | 0.10 | 0.31  | 18.51 | H           | B  | 0.09 | 0.23  | 14.50 | H           | B  | 0.09 | 0.25  | 23.82 | H           | B  | 0.09 | 0.50  | 13.93 | H           | B  | 0.08 | 0.40  | 15.88 |
| 12   | H        | E  | 0.09 | 0.41  | 13.13 | H           | E  | 0.11 | 0.52  | 17.83 | H           | E  | 0.10 | 0.63  | 22.37 | H           | E  | 0.10 | 0.76  | 18.61 | H           | E  | 0.09 | 0.40  | 13.93 | H           | E  | 0.09 | 0.44  | 23.32 | H           | E  | 0.09 | 0.68  | 14.63 | H           | E  | 0.08 | 0.62  | 15.28 |
| 13   | H        | E  | 0.10 | 0.56  | 12.86 | H           | E  | 0.11 | 0.62  | 17.44 | H           | E  | 0.11 | 0.63  | 21.66 | H           | E  | 0.11 | 0.64  | 18.54 | H           | E  | 0.10 | 0.56  | 12.83 | H           | E  | 0.10 | 0.59  | 22.65 | H           | E  | 0.10 | 0.67  | 15.21 | H           | E  | 0.09 | 0.64  | 14.20 |
| 14   | H        | E  | 0.10 | 0.35  | 12.41 | H           | E  | 0.11 | 0.16  | 16.59 | H           | E  | 0.11 | 0.34  | 20.71 | H           | E  | 0.11 | 0.29  | 19.23 | H           | E  | 0.10 | 0.35  | 12.52 | H           | E  | 0.10 | 0.36  | 20.58 | H           | E  | 0.10 | 0.37  | 13.81 | H           | E  | 0.09 | 0.34  | 13.19 |
| 15   | H        | B  | 0.10 | 0.02  | 12.31 | H           | B  | 0.11 | -0.10 | 15.79 | H           | B  | 0.11 | -0.06 | 21.35 | H           | B  | 0.11 | -0.17 | 19.75 | H           | B  | 0.10 | 0.01  | 13.29 | H           | B  | 0.10 | 0.02  | 19.29 | H           | B  | 0.10 | -0.07 | 12.58 | H           | B  | 0.09 | -0.03 | 12.96 |
| 16   | H        | E  | 0.10 | 0.16  | 11.95 | H           | E  | 0.11 | -0.01 | 15.78 | H           | E  | 0.11 | 0.10  | 21.97 | H           | E  | 0.11 | 0.02  | 19.56 | H           | E  | 0.10 | 0.15  | 12.86 | H           | E  | 0.10 | 0.16  | 19.13 | H           | E  | 0.10 | 0.13  | 13.74 | H           | E  | 0.09 | 0.14  | 12.87 |
| 17   | H        | E  | 0.09 | 0.22  | 11.53 | H           | E  | 0.11 | 0.05  | 15.67 | H           | E  | 0.10 | 0.23  | 21.14 | H           | E  | 0.11 | 0.27  | 19.88 | H           | E  | 0.09 | 0.21  | 12.16 | H           | E  | 0.09 | 0.21  | 18.41 | H           | E  | 0.10 | 0.33  | 13.67 | H           | E  | 0.08 | 0.24  | 12.19 |
| 18   | H        | B  | 0.09 | -0.12 | 11.26 | H           | B  | 0.11 | -0.03 | 14.54 | H           | B  | 0.10 | -0.13 | 20.61 | H           | B  | 0.11 | -0.05 | 20.74 | H           | B  | 0.09 | -0.13 | 14.03 | H           | B  | 0.09 | -0.14 | 17.16 | H           | B  | 0.10 | 0.01  | 12.64 | H           | B  | 0.08 | -0.12 | 12.27 |
| 19   | H        | E  | 0.09 | 0.08  | 11.60 | H           | E  | 0.10 | -0.00 | 14.44 | H           | E  | 0.09 | -0.13 | 21.77 | H           | E  | 0.10 | -0.02 | 20.94 | H           | E  | 0.09 | 0.07  | 14.99 | H           | E  | 0.09 | 0.06  | 16.42 | H           | E  | 0.09 | 0.15  | 13.07 | H           | E  | 0.07 | -0.13 | 13.20 |
| 20   | H        | E  | 0.08 | 0.22  | 11.51 | H           | E  | 0.09 | 0.08  | 15.02 | H           | E  | 0.08 | -0.00 | 21.49 | H           | E  | 0.10 | 0.10  | 20.88 | H           | E  | 0.08 | 0.21  | 13.32 | H           | E  | 0.08 | 0.23  | 16.66 | H           | E  | 0.08 | 0.37  | 14.14 | H           | E  | 0.06 | 0.00  | 13.29 |
| 21   | H        | E  | 0.08 | 0.31  | 10.75 | H           | E  | 0.08 | 0.47  | 14.60 | H           | E  | 0.08 | -0.07 | 20.14 | H           | E  | 0.09 | 0.19  | 21.71 | H           | E  | 0.08 | 0.30  | 14.03 | H           | E  | 0.08 | 0.34  | 16.21 | H           | E  | 0.08 | 0.37  | 13.16 | H           | E  | 0.06 | -0.08 | 12.97 |
| 22   | H        | B  | 0.08 | 0.34  | 10.98 | H           | B  | 0.08 | 0.27  | 14.00 | H           | B  | 0.08 | -0.04 | 20.17 | H           | B  | 0.08 | 0.48  | 22.39 | H           | B  | 0.08 | 0.33  | 16.68 | H           | B  | 0.08 | 0.37  | 15.42 | H           | B  | 0.08 | 0.58  | 12.89 | H           | B  | 0.06 | -0.04 | 14.30 |
| 23   | H        | E  | 0.08 | 0.59  | 11.62 | H           | E  | 0.08 | 0.47  | 14.30 | H           | E  | 0.08 | 0.23  | 21.00 | H           | E  | 0.07 | 0.23  | 22.82 | H           | E  | 0.08 | 0.61  | 17.52 | H           | E  | 0.08 | 0.61  | 15.84 | H           | E  | 0.08 | 0.88  | 14.34 | H           | E  | 0.06 | 0.24  | 15.68 |
| 24   | H        | E  | 0.08 | 0.56  | 11.40 | H           | E  | 0.08 | 0.38  | 14.95 | H           | E  | 0.08 | 0.24  | 19.85 | H           | E  | 0.07 | 0.23  | 22.97 | H           | E  | 0.08 | 0.57  | 16.53 | H           | E  | 0.08 | 0.58  | 16.39 | H           | E  | 0.08 | 0.91  | 14.65 | H           | E  | 0.07 | 0.28  | 15.41 |
| 25   | H        | E  | 0.07 | 0.41  | 11.12 | H           | E  | 0.07 | 0.25  | 14.76 | H           | E  | 0.07 | 0.02  | 18.87 | H           | E  | 0.07 | 0.19  | 23.40 | H           | E  | 0.07 | 0.40  | 18.62 | H           | E  | 0.07 | 0.42  | 16.30 | H           | E  | 0.07 | 0.69  | 13.69 | H           | E  | 0.07 | 0.07  | 16.03 |
| 26   | H        | E  | 0.07 | 0.60  | 12.12 | H           | E  | 0.07 | 0.53  | 14.64 | H           | E  | 0.07 | 0.28  | 19.80 | H           | E  | 0.07 | 0.42  | 23.84 | H           | E  | 0.07 | 0.59  | 21.00 | H           | E  | 0.07 | 0.60  | 16.41 | H           | E  | 0.07 | 0.89  | 14.60 | H           | E  | 0.07 | 0.28  | 17.81 |
| 27   | H        | E  | 0.07 | 0.85  | 12.70 | H           | E  | 0.07 | 1.49  | 15.50 | H           | E  | 0.07 | 0.35  | 19.85 | H           | E  | 0.07 | 0.47  | 24.25 | H           | E  | 0.07 | 0.86  | 20.69 | H           | E  | 0.07 | 0.87  | 18.46 | H           | E  | 0.07 | 0.86  | 15.59 | H           | E  | 0.06 | 0.33  | 18.50 |
| 28   | C        | E  | 0.06 | 0.92  | 12.41 | C           | E  | 0.06 | 1.31  | 16.08 | C           | E  | 0.06 | 0.32  | 18.66 | C           | E  | 0.06 | 0.51  | 24.36 | H           | E  | 0.06 | 0.89  | 21.16 | C           | E  | 0.06 | 0.94  | 19.34 | C           | E  | 0.06 | 1.00  | 15.22 | C           | E  | 0.05 | 0.30  | 19.85 |
| 29   | C        | E  | 0.05 | 1.02  | 12.88 | C           | E  | 0.05 | 0.46  | 15.81 | C           | E  | 0.05 | 0.42  | 18.48 | C           | E  | 0.05 | 0.36  | 24.69 | C           | E  | 0.05 | 1.02  | 23.71 | C           | E  | 0.05 | 1.05  | 19.49 | C           | E  | 0.05 | 1.22  | 15.56 | C           | E  | 0.04 | 0.42  | 20.51 |
| 30   | C        | E  | 0.04 | 0.43  | 14.09 | C           | E  | 0.05 | 0.37  | 15.67 | C           | E  | 0.05 | 0.45  | 18.75 | C           | E  | 0.05 | 0.42  | 24.84 | C           | E  | 0.04 | 0.44  | 24.97 | C           | E  | 0.04 | 0.46  | 20.50 | C           | E  | 0.04 | 0.48  | 17.48 | C           | E  | 0.04 | 0.45  | 21.36 |
| 31   | C        | E  | 0.04 | 0.29  | 14.14 | C           | E  | 0.04 | 0.30  | 14.93 | C           | E  | 0.05 | 0.33  | 18.50 | C           | E  | 0.04 | 0.30  | 24.99 | C           | E  | 0.04 | 0.28  | 25.41 | C           | E  | 0.04 | 0.30  | 20.96 | C           | E  | 0.04 | 0.28  | 17.55 | C           | E  | 0.04 | 0.31  | 21.51 |
| 32   | C        | E  | 0.05 | 0.26  | 14.26 | C           | E  | 0.04 | 0.25  | 14.35 | C           | E  | 0.05 | 0.33  | 17.95 | C           | E  | 0.04 | 0.27  | 25.26 | C           | E  | 0.05 | 0.32  | 26.34 | C           | E  | 0.05 | 0.26  | 20.60 | C           | E  | 0.05 | 0.26  | 18.76 | C           | E  | 0.05 | 0.33  | 21.68 |
| 33   | C        | E  | 0.05 | 0.28  | 15.04 | C           | E  | 0.04 | 0.29  | 14.26 | C           | E  | 0.05 | 0.21  | 17.49 | C           | E  | 0.04 | 0.25  | 25.44 | C           | E  | 0.05 | 0.23  | 26.95 | C           | E  | 0.05 | 0.28  | 19.76 | C           | E  | 0.05 | 0.22  | 19.99 | C           | E  | 0.05 | 0.21  | 21.74 |
| 34   | C        | E  | 0.04 | 0.30  | 15.55 | C           | E  | 0.04 | 0.26  | 14.42 | C           | E  | 0.05 | 0.33  | 16.75 | C           | E  | 0.04 | 0.28  | 25.43 | C           | E  | 0.04 | 0.29  | 28.00 | C           | E  | 0.05 | 0.29  | 20.23 | C           | E  | 0.04 | 0.27  | 21.59 | C           | E  | 0.05 | 0.34  | 22.31 |
| 35   | C        | E  | 0.03 | 0.22  | 15.76 | C           | E  | 0.05 | 0.11  | 14.88 | C           | E  | 0.05 | 0.93  | 17.20 | C           | E  | 0.04 | 0.21  | 25.01 | C           | E  | 0.04 | 0.89  | 28.85 | C           | E  | 0.03 | 0.25  | 20.70 | C           | E  | 0.03 | 0.29  | 21.83 | C           | E  | 0.05 | 0.94  | 22.75 |
| 36   | C        | E  | 0.03 | 0.16  | 16.19 | C           | E  | 0.05 | 0.20  | 15.42 | C           | E  | 0.05 | 0.99  | 16.42 | C           | E  | 0.04 | 0.20  | 24.66 | C           | E  | 0.04 | 0.87  | 29.71 | C           | E  | 0.03 | 0.19  | 21.17 | C           | E  | 0.03 | 0.16  | 22.83 | C           | E  | 0.05 | 1.01  | 22.78 |
| 37   | C        | E  | 0.03 | 0.12  | 16.39 | C           | E  | 0.05 | 0.12  | 15.15 | C           | E  | 0.05 | 0.95  | 15.89 | C           | E  | 0.04 | 0.13  | 23.17 | C           | E  | 0.04 | 0.90  | 30.48 | C           | E  | 0.03 | 0.14  | 21.54 | C           | E  | 0.03 | 0.20  | 22.97 | C           | E  | 0.05 | 0.96  | 22.20 |
| 38   | C        | E  | 0.03 | -0.03 | 16.28 | C           | E  | 0.05 | -0.04 | 14.94 | C           | E  | 0.05 | 0.74  | 14.94 | C           | E  | 0.04 | -0.07 | 22.43 |             |    |      |       |       |             |    |      |       |       |             |    |      |       |       |             |    |      |       |       |

|    |   |   |      |       |       |   |   |      |       |       |   |   |      |       |       |   |   |      |       |       |   |   |      |       |       |   |   |      |       |       |   |   |      |       |       |   |   |      |       |       |
|----|---|---|------|-------|-------|---|---|------|-------|-------|---|---|------|-------|-------|---|---|------|-------|-------|---|---|------|-------|-------|---|---|------|-------|-------|---|---|------|-------|-------|---|---|------|-------|-------|
| 52 | C | E | 0.08 | 0.54  | 18.96 | C | E | 0.03 | 0.10  | 14.98 | C | E | 0.06 | 0.19  | 15.27 | C | E | 0.04 | 0.09  | 13.55 | C | E | 0.06 | 0.01  | 25.06 | C | E | 0.07 | 0.49  | 30.53 | C | E | 0.06 | 0.39  | 28.32 | C | E | 0.06 | 0.20  | 24.48 |
| 53 | C | E | 0.08 | 0.50  | 18.80 | C | E | 0.03 | 0.05  | 16.01 | C | E | 0.05 | 0.02  | 15.86 | C | E | 0.04 | 0.04  | 13.70 | C | E | 0.06 | 0.18  | 26.70 | C | E | 0.07 | 0.45  | 30.86 | C | E | 0.06 | 0.43  | 29.33 | C | E | 0.06 | 0.03  | 25.18 |
| 54 | C | E | 0.07 | -0.20 | 18.66 | C | E | 0.03 | -0.14 | 15.98 | C | E | 0.05 | -0.04 | 16.21 | C | E | 0.04 | -0.15 | 13.10 | C | E | 0.07 | -0.26 | 25.87 | C | E | 0.06 | -0.25 | 29.62 | C | E | 0.06 | 0.08  | 28.24 | C | E | 0.06 | -0.03 | 25.98 |
| 55 | C | E | 0.07 | -0.25 | 18.92 | C | E | 0.03 | -0.07 | 15.73 | C | E | 0.06 | 1.06  | 16.94 | C | E | 0.04 | -0.05 | 12.04 | C | E | 0.07 | -0.27 | 26.33 | C | E | 0.06 | -0.28 | 28.79 | C | E | 0.07 | 0.60  | 28.01 | C | E | 0.07 | 1.07  | 27.81 |
| 56 | C | E | 0.08 | -0.25 | 19.16 | C | E | 0.03 | -0.07 | 16.19 | C | E | 0.07 | 0.74  | 17.55 | C | E | 0.05 | -0.05 | 12.07 | C | E | 0.07 | -0.26 | 25.39 | C | E | 0.07 | -0.29 | 28.08 | C | E | 0.08 | 0.40  | 27.60 | C | E | 0.08 | 0.77  | 29.16 |
| 57 | C | E | 0.08 | -0.10 | 19.02 | C | E | 0.03 | -0.06 | 16.26 | C | E | 0.07 | 0.77  | 18.21 | C | E | 0.05 | -0.05 | 12.65 | C | E | 0.07 | -0.12 | 25.59 | C | E | 0.07 | -0.13 | 26.73 | C | E | 0.08 | 0.41  | 26.74 | C | E | 0.08 | 0.79  | 29.84 |
| 58 | C | B | 0.08 | -0.27 | 18.93 | C | B | 0.03 | -0.06 | 16.58 | C | B | 0.07 | 0.63  | 18.56 | C | B | 0.05 | -0.06 | 12.17 | C | B | 0.07 | -0.30 | 24.98 | C | B | 0.07 | -0.27 | 25.88 | C | B | 0.08 | 0.22  | 26.33 | C | B | 0.08 | 0.60  | 29.27 |
| 59 | C | E | 0.08 | -0.12 | 19.04 | C | E | 0.04 | 0.08  | 16.30 | C | E | 0.07 | 0.74  | 18.74 | C | E | 0.06 | 0.02  | 11.62 | C | E | 0.07 | -0.12 | 25.87 | C | E | 0.07 | -0.13 | 25.99 | C | E | 0.08 | 0.34  | 26.49 | C | E | 0.08 | 0.72  | 30.17 |
| 60 | C | E | 0.08 | 0.10  | 19.55 | C | E | 0.04 | 0.20  | 15.84 | C | E | 0.07 | 0.65  | 18.09 | C | E | 0.06 | 0.17  | 11.34 | C | E | 0.07 | 0.09  | 25.12 | C | E | 0.07 | 0.07  | 25.60 | C | E | 0.08 | 0.38  | 25.36 | C | E | 0.08 | 0.66  | 31.11 |
| 61 | C | E | 0.08 | 0.25  | 19.74 | C | E | 0.04 | 0.31  | 16.06 | C | E | 0.08 | 0.89  | 18.50 | C | E | 0.06 | 0.27  | 11.40 | C | E | 0.07 | 0.19  | 24.14 | C | E | 0.07 | 0.23  | 24.57 | C | E | 0.08 | 0.64  | 24.22 | C | E | 0.08 | 0.88  | 31.01 |
| 62 | C | E | 0.07 | 0.20  | 19.17 | C | E | 0.04 | 0.26  | 15.86 | C | E | 0.08 | 0.67  | 19.03 | C | E | 0.06 | 0.27  | 11.29 | C | E | 0.06 | 0.14  | 23.58 | C | E | 0.06 | 0.18  | 23.77 | C | E | 0.08 | 0.46  | 23.99 | C | E | 0.08 | 0.64  | 30.19 |
| 63 | C | E | 0.08 | 0.07  | 19.16 | C | E | 0.04 | 0.23  | 15.51 | C | E | 0.08 | 0.35  | 18.91 | C | E | 0.06 | 0.31  | 11.27 | C | E | 0.07 | 0.04  | 24.27 | C | E | 0.07 | 0.06  | 22.88 | C | E | 0.09 | 0.25  | 23.48 | C | E | 0.09 | 0.32  | 28.47 |
| 64 | C | E | 0.08 | 0.13  | 19.31 | C | E | 0.04 | 0.19  | 15.91 | C | E | 0.08 | 0.13  | 18.13 | C | E | 0.06 | 0.22  | 12.18 | C | E | 0.07 | 0.10  | 22.38 | C | E | 0.07 | 0.12  | 21.91 | C | E | 0.08 | 0.06  | 22.05 | C | E | 0.08 | 0.11  | 27.74 |
| 65 | C | E | 0.08 | 0.05  | 18.70 | C | E | 0.04 | 0.15  | 16.28 | C | E | 0.08 | 0.03  | 17.84 | C | E | 0.06 | 0.22  | 12.31 | C | E | 0.07 | 0.02  | 21.55 | C | E | 0.08 | 0.03  | 21.58 | C | E | 0.08 | 0.01  | 21.52 | C | E | 0.09 | 0.02  | 28.13 |
| 66 | C | E | 0.07 | 0.15  | 18.16 | C | E | 0.03 | 0.17  | 15.73 | C | E | 0.06 | 0.06  | 18.04 | C | E | 0.06 | 0.72  | 11.48 | C | E | 0.06 | 0.09  | 21.76 | C | E | 0.06 | 0.09  | 21.51 | C | E | 0.08 | 0.15  | 21.41 | C | E | 0.08 | 0.06  | 27.79 |
| 67 | C | E | 0.07 | -0.00 | 18.43 | C | E | 0.03 | 0.15  | 15.58 | C | E | 0.07 | 0.12  | 18.07 | C | E | 0.06 | 0.84  | 11.84 | C | E | 0.06 | -0.01 | 21.55 | C | E | 0.06 | 0.04  | 20.39 | C | E | 0.08 | 0.13  | 21.77 | C | E | 0.09 | 0.10  | 26.87 |
| 68 | C | E | 0.05 | 0.20  | 17.98 | C | E | 0.03 | 0.22  | 14.83 | C | E | 0.06 | 0.36  | 17.66 | C | E | 0.05 | 1.28  | 12.52 | C | E | 0.06 | 0.18  | 22.08 | C | E | 0.05 | 0.17  | 19.33 | C | E | 0.08 | 0.32  | 22.17 | C | E | 0.08 | 0.36  | 26.87 |
| 69 | C | E | 0.07 | 0.06  | 17.52 | C | E | 0.03 | 0.25  | 14.06 | C | E | 0.07 | 0.35  | 17.18 | C | E | 0.06 | 1.46  | 12.08 | C | E | 0.06 | 0.05  | 21.58 | C | E | 0.06 | 0.07  | 19.34 | C | E | 0.08 | 0.30  | 21.30 | C | E | 0.09 | 0.33  | 26.01 |
| 70 | C | E | 0.08 | 0.12  | 16.32 | C | E | 0.03 | 0.26  | 13.21 | C | E | 0.07 | 0.26  | 16.14 | C | E | 0.05 | 1.51  | 12.18 | C | E | 0.07 | 0.13  | 20.44 | C | E | 0.07 | 0.09  | 18.14 | C | E | 0.08 | 0.29  | 19.89 | C | E | 0.09 | 0.25  | 24.31 |
| 71 | C | E | 0.08 | 0.23  | 15.59 | C | E | 0.03 | 0.28  | 12.78 | C | E | 0.07 | 0.33  | 15.54 | C | E | 0.05 | 1.44  | 11.40 | C | E | 0.06 | 0.21  | 20.26 | C | E | 0.07 | 0.21  | 16.96 | C | E | 0.08 | 0.36  | 20.51 | C | E | 0.09 | 0.32  | 23.60 |
| 72 | C | E | 0.08 | 0.44  | 14.65 | C | E | 0.03 | 0.35  | 12.26 | C | E | 0.07 | 0.64  | 14.71 | C | E | 0.06 | 1.32  | 10.96 | C | E | 0.06 | 0.45  | 19.18 | C | E | 0.07 | 0.37  | 16.47 | C | E | 0.08 | 0.55  | 20.31 | C | E | 0.08 | 0.63  | 22.41 |
| 73 | C | E | 0.06 | 0.48  | 13.98 | C | E | 0.02 | 0.42  | 11.41 | C | E | 0.05 | 0.78  | 14.07 | C | E | 0.04 | 1.22  | 10.19 | C | E | 0.05 | 0.50  | 18.38 | C | E | 0.05 | 0.42  | 15.55 | C | E | 0.07 | 0.60  | 18.83 | C | E | 0.07 | 0.75  | 21.25 |
| 74 | C | E | 0.06 | 0.49  | 12.80 | C | E | 0.02 | 0.34  | 10.78 | C | E | 0.05 | 0.54  | 12.87 | C | E | 0.04 | 1.07  | 9.58  | C | E | 0.05 | 0.51  | 17.22 | C | E | 0.05 | 0.45  | 14.37 | C | E | 0.07 | 0.48  | 17.08 | C | E | 0.07 | 0.50  | 19.37 |
| 75 | C | E | 0.07 | 0.39  | 11.92 | C | E | 0.03 | 0.31  | 10.06 | C | E | 0.06 | 0.42  | 11.90 | C | E | 0.05 | 0.93  | 8.70  | C | E | 0.05 | 0.46  | 16.30 | C | E | 0.06 | 0.36  | 13.43 | C | E | 0.07 | 0.41  | 15.93 | C | E | 0.08 | 0.41  | 17.56 |
| 76 | C | E | 0.06 | 0.16  | 11.38 | C | E | 0.03 | 0.29  | 9.42  | C | E | 0.06 | 0.27  | 10.96 | C | E | 0.05 | 0.76  | 8.36  | C | E | 0.05 | 0.23  | 15.86 | C | E | 0.06 | 0.11  | 13.41 | C | E | 0.06 | 0.26  | 14.67 | C | E | 0.07 | 0.25  | 16.01 |
| 77 | C | E | 0.05 | 0.06  | 10.52 | C | E | 0.02 | 0.19  | 8.96  | C | E | 0.05 | 0.18  | 10.39 | C | E | 0.04 | 1.18  | 7.45  | C | E | 0.05 | 0.14  | 15.26 | C | E | 0.05 | 0.02  | 11.96 | C | E | 0.05 | 0.15  | 12.85 | H | E | 0.06 | 0.15  | 14.54 |
| 78 | C | E | 0.05 | 0.13  | 9.54  | C | E | 0.02 | 0.28  | 8.68  | C | E | 0.05 | 0.14  | 9.55  | C | E | 0.04 | 1.20  | 7.49  | C | E | 0.04 | 0.19  | 15.35 | C | E | 0.05 | 0.07  | 11.74 | C | E | 0.05 | 0.10  | 11.96 | H | E | 0.05 | 0.10  | 13.48 |
| 79 | C | E | 0.06 | 0.24  | 8.55  | C | E | 0.03 | 0.87  | 7.63  | C | E | 0.05 | 0.23  | 8.69  | C | E | 0.05 | 0.91  | 6.85  | C | E | 0.05 | 0.29  | 14.43 | C | E | 0.06 | 0.18  | 10.36 | C | E | 0.05 | 0.21  | 10.14 | C | E | 0.06 | 0.22  | 11.78 |
| 80 | C | E | 0.05 | 0.22  | 7.67  | C | E | 0.04 | 0.54  | 6.73  | C | E | 0.05 | 0.14  | 7.92  | C | E | 0.05 | 0.49  | 7.02  | C | E | 0.05 | 0.20  | 13.54 | C | E | 0.05 | 0.13  | 10.01 | C | E | 0.05 | 0.15  | 8.87  | C | E | 0.06 | 0.14  | 10.74 |
| 81 | C | E | 0.05 | 0.10  | 6.68  | C | E | 0.04 | 0.80  | 5.45  | C | E | 0.05 | 0.03  | 6.66  | C | E | 0.06 | 0.75  | 6.09  | C | E | 0.05 | 0.06  | 10.74 | C | E | 0.05 | 0.01  | 7.96  | C | E | 0.05 | 0.03  | 7.24  | C | E | 0.06 | 0.02  | 8.54  |
| 82 | C | E | 0.06 | 0.08  | 6.05  | C | E | 0.06 | 0.96  | 5.07  | C | E | 0.06 | -0.00 | 6.10  | C | E | 0.07 | 0.91  | 5.84  | C | E | 0.05 | 0.04  | 7.24  | C | E | 0.06 | -0.04 | 7.30  | C | E | 0.07 | -0.05 | 6.81  | C | E | 0.07 | 0.00  | 7.44  |
| 83 | C | E | 0.05 | -0.13 | 5.95  | C | E | 0.05 | 0.67  | 5.06  | C | E | 0.05 | -0.16 | 6.00  | C | E | 0.07 | 0.69  | 5.81  | C | E | 0.05 | -0.16 | 6.92  | C | E | 0.05 | -0.17 | 6.87  | C | E | 0.05 | -0.21 | 6.80  | C | E | 0.06 | -0.17 | 7.24  |
| 84 | C | E | 0.08 | -0.37 | 5.86  | C | E | 0.06 | 0.22  | 5.02  | C | E | 0.08 | -0.42 | 5.93  | C | E | 0.07 | 0.18  | 5.73  | C | E | 0.07 | -0.39 | 6.82  | C | E | 0.08 | -0.41 | 6.77  | C | E | 0.08 | -0.42 | 6.73  | C | E | 0.08 | -0.40 | 7.17  |
| 85 | C | E | 0.09 | -0.15 | 5.77  | C | E | 0.07 | 0.61  | 4.95  | C | E | 0.09 | -0.21 | 5.81  | C | E | 0.08 | 0.51  | 5.68  | C | E | 0.10 | -0.16 | 6.74  | C | E | 0.09 | -0.20 | 6.71  | C | E | 0.09 | -0.22 | 6.67  | C | E | 0.11 | -0.18 | 7.07  |
| 86 | C | B | 0.09 | -0.25 | 5.79  | C | E | 0.07 | 0.77  | 4.99  | C | B | 0.09 | -0.30 | 5.83  | C | E | 0.08 | 0.78  | 5.70  | C | B | 0.10 | -0.23 | 6.76  | C | B | 0.09 | -0.27 | 6.77  | C | B | 0.10 | -0.23 | 6.67  | C | B | 0.11 | -0.26 | 7.08  |
| 87 | C | E | 0.11 | -0.35 | 5.75  | C | E | 0.09 | 0.18  | 4.98  | C | E | 0.10 | -0.42 | 5.83  | C | E | 0.09 | 0.21  | 5.66  | C | E | 0.12 | -0.35 | 6.71  | C | E | 0.12 | -0.35 | 6.72  | C | E | 0.12 | -0.35 | 6.65  | C | E | 0.12 | -0.43 | 7.07  |
| 88 | H | E | 0.12 | 0.02  | 5.65  | H | E | 0.12 | -0.14 | 4.80  | H | E | 0.12 | 0.02  | 5.61  | H | E | 0.10 | 0.14  | 5.50  | H | E | 0.12 | 0.03  | 6.52  | H | E | 0.12 | -0.01 | 6.52  | H | E | 0.12 | -0.17 | 6.47  | H | E | 0.13 | -0.02 | 6.84  |
| 89 | H | E | 0.13 | 0.12  | 5.59  | H | E | 0.12 | 0.02  | 4.78  | H | E | 0.14 | 0.20  | 5.57  | H | E | 0.10 | 0.19  | 5.51  | H | E | 0.13 | 0.13  | 6.53  | H | E | 0.13 | 0.09  | 6.53  | H | E | 0.13 | 0.04  | 6.45  | H | E | 0.13 | 0.17  | 6.82  |
| 90 | H | B | 0.13 | -0.01 | 5.58  | H | E | 0.12 | -0.12 | 4.78  | H | B | 0.14 | -0.03 | 5.59  | H | E | 0.10 | -0.10 | 5.49  | H | B | 0.13 | -0.03 | 6.51  | H | B | 0.13 | -0.06 | 6.54  | H | B | 0.13 | -0.22 | 6.45  | H | B | 0.13 | -0.06 | 6.82  |
| 91 | H | E | 0.12 | 0.08  | 5.53  | H | E | 0.12 | -0.30 | 4.76  | H | E | 0.13 | 0.06  | 5.56  |   |   |      |       |       |   |   |      |       |       |   |   |      |       |       |   |   |      |       |       |   |   |      |       |       |

|     |   |   |      |       |       |   |   |      |       |       |   |   |      |       |      |   |   |      |       |       |   |   |      |       |       |   |   |      |       |       |   |   |      |       |       |   |   |      |       |       |
|-----|---|---|------|-------|-------|---|---|------|-------|-------|---|---|------|-------|------|---|---|------|-------|-------|---|---|------|-------|-------|---|---|------|-------|-------|---|---|------|-------|-------|---|---|------|-------|-------|
| 106 | C | E | 0.10 | 0.52  | 5.04  | H | E | 0.09 | 0.24  | 4.43  | H | E | 0.11 | 0.25  | 4.89 | H | E | 0.10 | 0.25  | 5.03  | H | E | 0.11 | 0.51  | 6.14  | H | E | 0.08 | 0.51  | 6.26  | H | E | 0.11 | 0.29  | 6.37  | H | E | 0.11 | 0.23  | 6.36  |
| 107 | C | E | 0.10 | 0.46  | 4.96  | H | E | 0.09 | 0.09  | 4.34  | H | E | 0.11 | 0.16  | 4.82 | H | E | 0.12 | 0.03  | 4.99  | C | E | 0.11 | 0.46  | 6.07  | H | E | 0.08 | 0.47  | 6.19  | C | E | 0.11 | 0.18  | 6.17  | H | E | 0.10 | 0.16  | 6.32  |
| 108 | C | E | 0.09 | 0.63  | 4.90  | C | E | 0.09 | 0.25  | 4.34  | C | E | 0.10 | 0.39  | 4.76 | C | E | 0.11 | 0.21  | 5.02  | C | E | 0.10 | 0.64  | 6.07  | C | E | 0.08 | 0.60  | 6.28  | C | E | 0.10 | 0.37  | 6.16  | C | E | 0.10 | 0.39  | 6.36  |
| 109 | C | E | 0.08 | 0.25  | 4.90  | C | E | 0.08 | 0.40  | 4.32  | C | E | 0.10 | 0.35  | 4.80 | C | E | 0.10 | 0.23  | 4.95  | C | E | 0.09 | 0.26  | 6.06  | C | E | 0.08 | 0.36  | 6.22  | C | E | 0.10 | 0.32  | 6.17  | C | E | 0.10 | 0.31  | 6.31  |
| 110 | C | E | 0.08 | -0.03 | 4.86  | C | E | 0.10 | 0.33  | 4.28  | C | E | 0.10 | 0.08  | 4.74 | C | E | 0.10 | 0.16  | 4.90  | C | E | 0.09 | -0.04 | 6.02  | C | E | 0.08 | 0.30  | 6.15  | C | E | 0.10 | 0.08  | 6.16  | C | E | 0.12 | 0.06  | 6.25  |
| 111 | C | E | 0.08 | 0.16  | 4.78  | C | E | 0.11 | 0.32  | 4.20  | C | E | 0.10 | 0.22  | 4.63 | C | E | 0.11 | 0.10  | 4.86  | C | E | 0.09 | 0.18  | 5.98  | C | E | 0.08 | 0.32  | 6.12  | C | E | 0.10 | 0.21  | 6.12  | C | E | 0.12 | 0.11  | 6.18  |
| 112 | H | B | 0.10 | -0.12 | 4.73  | H | B | 0.12 | -0.07 | 4.18  | H | B | 0.11 | -0.12 | 4.62 | H | B | 0.12 | -0.14 | 4.82  | H | E | 0.10 | -0.06 | 5.99  | H | B | 0.11 | -0.03 | 6.13  | H | B | 0.11 | -0.08 | 6.12  | H | B | 0.12 | -0.15 | 6.18  |
| 113 | H | E | 0.11 | -0.31 | 4.76  | H | E | 0.12 | -0.15 | 4.22  | H | E | 0.12 | -0.25 | 4.70 | H | E | 0.12 | -0.26 | 4.82  | H | E | 0.10 | -0.32 | 5.99  | H | E | 0.12 | -0.18 | 6.14  | H | E | 0.12 | -0.26 | 6.12  | H | E | 0.12 | 0.07  | 6.21  |
| 114 | H | E | 0.12 | 0.10  | 4.73  | H | E | 0.12 | -0.04 | 4.24  | H | E | 0.12 | 0.04  | 4.73 | H | E | 0.12 | -0.17 | 4.80  | H | E | 0.10 | 0.07  | 5.99  | H | E | 0.12 | 0.09  | 6.14  | H | E | 0.11 | -0.17 | 6.13  | H | E | 0.13 | 0.25  | 6.20  |
| 115 | H | E | 0.12 | 0.20  | 4.68  | H | E | 0.12 | 0.05  | 4.25  | H | E | 0.13 | 0.14  | 4.70 | H | E | 0.12 | -0.05 | 4.75  | H | E | 0.11 | 0.17  | 5.96  | H | E | 0.12 | 0.20  | 6.12  | H | E | 0.11 | -0.06 | 6.13  | H | E | 0.14 | 0.27  | 6.19  |
| 116 | H | E | 0.13 | 0.19  | 4.68  | C | E | 0.12 | 0.05  | 4.24  | H | E | 0.12 | 0.11  | 4.79 | H | E | 0.12 | -0.17 | 4.75  | C | E | 0.12 | 0.20  | 5.91  | H | E | 0.12 | 0.18  | 6.17  | C | E | 0.12 | 0.03  | 6.08  | H | E | 0.14 | 0.15  | 6.22  |
| 117 | H | E | 0.13 | 0.38  | 4.73  | C | E | 0.12 | -0.03 | 4.29  | H | E | 0.12 | 0.11  | 4.89 | H | E | 0.12 | -0.04 | 4.76  | C | E | 0.12 | 0.52  | 5.95  | H | E | 0.12 | 0.18  | 6.19  | C | E | 0.12 | 0.27  | 6.07  | H | E | 0.14 | 0.14  | 6.29  |
| 118 | H | E | 0.14 | 0.17  | 4.77  | H | E | 0.12 | -0.29 | 4.38  | H | E | 0.13 | -0.08 | 4.91 | H | E | 0.12 | -0.15 | 4.73  | H | E | 0.14 | 0.35  | 6.02  | H | E | 0.12 | 0.03  | 6.20  | H | E | 0.14 | 0.12  | 6.05  | H | E | 0.15 | 0.00  | 6.31  |
| 119 | H | B | 0.14 | -0.17 | 4.68  | H | B | 0.12 | -0.34 | 4.35  | H | B | 0.13 | -0.28 | 4.87 | H | B | 0.12 | -0.47 | 4.65  | H | B | 0.14 | -0.04 | 5.91  | H | B | 0.12 | -0.17 | 6.10  | H | B | 0.14 | -0.20 | 6.01  | H | B | 0.15 | -0.27 | 6.27  |
| 120 | H | E | 0.15 | 0.09  | 4.60  | H | E | 0.12 | -0.27 | 4.22  | H | E | 0.14 | 0.01  | 4.75 | H | E | 0.12 | -0.32 | 4.61  | H | E | 0.14 | -0.01 | 5.86  | H | E | 0.13 | 0.16  | 6.05  | H | E | 0.14 | -0.15 | 5.97  | H | E | 0.15 | -0.23 | 6.19  |
| 121 | H | E | 0.15 | 0.02  | 4.63  | H | E | 0.12 | -0.31 | 4.24  | H | E | 0.14 | 0.03  | 4.81 | H | E | 0.12 | -0.13 | 4.69  | H | E | 0.14 | -0.08 | 5.91  | H | E | 0.13 | 0.12  | 6.10  | H | E | 0.14 | -0.04 | 6.01  | H | E | 0.15 | -0.17 | 6.15  |
| 122 | H | E | 0.14 | -0.07 | 4.64  | H | E | 0.12 | -0.19 | 4.26  | H | E | 0.14 | -0.14 | 4.85 | H | E | 0.12 | -0.27 | 4.66  | H | E | 0.13 | -0.13 | 5.95  | H | E | 0.13 | -0.04 | 6.13  | H | E | 0.14 | -0.23 | 5.99  | H | E | 0.14 | -0.25 | 6.17  |
| 123 | H | B | 0.13 | -0.03 | 4.58  | H | E | 0.13 | -0.16 | 4.17  | H | B | 0.14 | -0.07 | 4.74 | H | B | 0.12 | -0.16 | 4.63  | H | B | 0.12 | -0.09 | 5.92  | H | B | 0.13 | -0.01 | 6.10  | H | B | 0.14 | -0.21 | 5.97  | H | B | 0.14 | -0.19 | 6.10  |
| 124 | H | E | 0.14 | 0.11  | 4.66  | H | E | 0.13 | -0.03 | 4.20  | H | E | 0.14 | 0.17  | 4.80 | H | E | 0.12 | 0.08  | 4.71  | H | E | 0.12 | 0.05  | 5.98  | H | E | 0.13 | 0.12  | 6.16  | H | E | 0.14 | 0.06  | 6.00  | H | E | 0.14 | 0.07  | 6.14  |
| 125 | H | E | 0.13 | 0.12  | 4.70  | C | E | 0.13 | 0.44  | 4.31  | H | E | 0.14 | 0.22  | 4.89 | H | E | 0.12 | 0.30  | 4.71  | H | E | 0.12 | 0.14  | 6.04  | H | E | 0.13 | 0.14  | 6.21  | C | E | 0.13 | 0.16  | 6.12  | H | E | 0.14 | 0.16  | 6.19  |
| 126 | C | E | 0.12 | 0.03  | 4.65  | C | E | 0.13 | 0.42  | 4.20  | C | E | 0.12 | 0.15  | 4.84 | C | E | 0.12 | 0.24  | 4.66  | C | E | 0.11 | 0.07  | 6.04  | C | E | 0.12 | 0.03  | 6.24  | C | E | 0.12 | 0.02  | 6.03  | C | E | 0.12 | 0.17  | 6.17  |
| 127 | C | E | 0.11 | 0.17  | 4.69  | C | E | 0.12 | 0.54  | 4.22  | C | E | 0.12 | 0.33  | 4.87 | C | E | 0.12 | 0.44  | 4.69  | C | E | 0.10 | 0.13  | 6.09  | C | E | 0.11 | 0.16  | 6.31  | C | E | 0.12 | 0.20  | 6.04  | C | E | 0.12 | 0.32  | 6.17  |
| 128 | C | E | 0.10 | 0.47  | 4.63  | C | E | 0.12 | 0.72  | 4.18  | C | E | 0.11 | 0.44  | 4.79 | C | E | 0.12 | 0.71  | 4.65  | C | E | 0.09 | 0.35  | 6.06  | C | E | 0.10 | 0.46  | 6.31  | C | E | 0.11 | 0.25  | 6.01  | C | E | 0.11 | 0.40  | 6.13  |
| 129 | C | E | 0.08 | 0.14  | 4.67  | C | E | 0.11 | 0.46  | 4.34  | C | E | 0.09 | 0.53  | 4.91 | C | E | 0.10 | 0.87  | 4.59  | C | E | 0.07 | 0.39  | 6.39  | C | E | 0.08 | 0.12  | 6.49  | C | E | 0.09 | 0.44  | 6.46  | C | E | 0.08 | 0.49  | 6.30  |
| 130 | C | E | 0.08 | 0.11  | 6.04  | C | E | 0.11 | 0.60  | 5.68  | C | E | 0.09 | 0.48  | 5.94 | C | E | 0.10 | 0.92  | 4.98  | C | E | 0.06 | 0.15  | 8.37  | C | E | 0.08 | 0.07  | 8.36  | C | E | 0.08 | 0.52  | 8.82  | C | E | 0.08 | 0.47  | 7.37  |
| 131 | C | E | 0.09 | -0.02 | 7.14  | C | E | 0.11 | 0.69  | 6.71  | C | E | 0.10 | 0.29  | 6.13 | C | E | 0.09 | 0.96  | 5.84  | C | E | 0.07 | 0.04  | 11.49 | C | E | 0.09 | -0.05 | 10.52 | C | E | 0.09 | 0.31  | 10.60 | C | E | 0.09 | 0.25  | 7.52  |
| 132 | C | E | 0.09 | -0.02 | 8.49  | C | E | 0.09 | 0.54  | 7.78  | C | E | 0.10 | 0.19  | 6.14 | C | E | 0.07 | 0.77  | 6.64  | C | E | 0.07 | 0.07  | 12.88 | C | E | 0.09 | -0.07 | 11.53 | C | E | 0.09 | 0.24  | 11.32 | C | E | 0.09 | 0.19  | 7.87  |
| 133 | C | E | 0.09 | -0.10 | 9.08  | C | E | 0.11 | 0.51  | 8.23  | C | E | 0.10 | 0.03  | 6.29 | C | E | 0.07 | 0.65  | 6.72  | C | E | 0.07 | -0.07 | 14.87 | C | E | 0.09 | -0.15 | 12.13 | C | E | 0.09 | 0.10  | 12.76 | C | E | 0.08 | 0.03  | 8.07  |
| 134 | C | B | 0.09 | -0.04 | 10.10 | C | B | 0.10 | 0.19  | 8.94  | C | B | 0.10 | 0.13  | 6.40 | C | B | 0.08 | 0.25  | 6.87  | C | B | 0.07 | -0.05 | 16.36 | C | B | 0.09 | -0.06 | 13.04 | C | B | 0.09 | 0.19  | 13.74 | C | B | 0.08 | 0.14  | 8.41  |
| 135 | C | E | 0.08 | -0.07 | 10.19 | C | E | 0.09 | 0.39  | 9.43  | C | E | 0.08 | 0.14  | 7.43 | C | E | 0.08 | 0.53  | 8.21  | C | E | 0.05 | -0.05 | 17.65 | C | E | 0.08 | -0.02 | 13.90 | C | E | 0.08 | 0.21  | 14.72 | C | E | 0.07 | 0.08  | 9.58  |
| 136 | C | B | 0.07 | 0.03  | 11.61 | C | B | 0.06 | 0.15  | 10.08 | C | B | 0.08 | 0.08  | 7.51 | C | B | 0.05 | 0.10  | 9.19  | C | B | 0.05 | -0.02 | 19.88 | C | B | 0.07 | 0.06  | 15.41 | C | B | 0.07 | 0.11  | 15.50 | C | B | 0.05 | 0.08  | 9.99  |
| 137 | C | E | 0.08 | 0.43  | 12.01 | C | E | 0.06 | 0.24  | 11.19 | C | E | 0.10 | 0.23  | 8.83 | C | E | 0.06 | 0.16  | 10.13 | C | E | 0.06 | 0.42  | 20.62 | C | E | 0.08 | 0.45  | 16.85 | C | E | 0.08 | 0.23  | 16.29 | C | E | 0.07 | 0.19  | 9.89  |
| 138 | C | E | 0.08 | 0.31  | 12.52 | C | E | 0.05 | 0.35  | 11.48 | C | E | 0.09 | 0.25  | 8.09 | C | E | 0.06 | 0.24  | 10.70 | C | E | 0.06 | 0.33  | 20.87 | C | E | 0.08 | 0.32  | 17.73 | C | E | 0.08 | 0.25  | 17.20 | C | E | 0.07 | 0.25  | 10.24 |
| 139 | C | E | 0.08 | 0.42  | 12.39 | C | E | 0.05 | 0.39  | 12.66 | C | E | 0.08 | 0.40  | 8.10 | C | E | 0.05 | 0.35  | 10.93 | C | E | 0.07 | 0.46  | 20.27 | C | E | 0.08 | 0.43  | 18.51 | C | E | 0.08 | 0.37  | 17.80 | C | E | 0.06 | 0.43  | 11.30 |
| 140 | C | E | 0.08 | 0.44  | 12.69 | C | E | 0.06 | 0.33  | 12.78 | C | E | 0.08 | 0.48  | 8.48 | C | E | 0.07 | 0.34  | 11.05 | C | E | 0.07 | 0.50  | 19.22 | C | E | 0.08 | 0.44  | 18.53 | C | E | 0.08 | 0.51  | 17.95 | C | E | 0.06 | 0.46  | 12.10 |
| 141 | C | E | 0.08 | 0.72  | 12.97 | C | E | 0.06 | 0.60  | 13.32 | C | E | 0.09 | 0.72  | 8.63 | C | E | 0.07 | 0.42  | 11.58 | C | E | 0.07 | 0.79  | 18.14 | C | E | 0.08 | 0.72  | 19.21 | C | E | 0.08 | 0.66  | 18.37 | C | E | 0.06 | 0.68  | 12.75 |
| 142 | C | E | 0.07 | 0.84  | 12.84 | C | E | 0.06 | 0.96  | 13.00 | C | E | 0.08 | 0.87  | 8.71 | C | E | 0.07 | 0.32  | 11.64 | C | E | 0.06 | 0.88  | 16.42 | C | E | 0.07 | 0.85  | 18.42 | C | E | 0.06 | 0.43  | 17.74 | C | E | 0.05 | 0.81  | 13.40 |
| 143 | C | E | 0.08 | 0.86  | 12.46 | C | E | 0.06 | 1.62  | 12.87 | C | E | 0.08 | 0.84  | 9.20 | C | E | 0.07 | 0.33  | 12.05 | C | E | 0.07 | 0.86  | 16.07 | C | E | 0.08 | 0.86  | 17.92 | C | E | 0.07 | 0.38  | 16.74 | C | E | 0.05 | 0.79  | 13.44 |
| 144 | C | E | 0.08 | 0.83  | 11.55 | C | E | 0.06 | 1.57  | 12.28 | C | E | 0.08 | 0.84  | 9.21 | C | E | 0.07 | 0.40  | 11.17 | C | E | 0.07 | 0.84  | 15.45 | C | E | 0.08 | 0.80  | 15.99 | C | E | 0.08 | 0.31  | 15.65 | C | E | 0.06 | 0.80  | 12.46 |
| 145 | C | E | 0.07 | 0.99  | 10.24 | C | E | 0.05 | 1.43  | 11.81 | C | E | 0.06 | 1.02  | 9.70 | C | E | 0.05 | 0.38  | 10.56 | C | E | 0.06 | 0.98  | 15.10 | C | E | 0.07 |       |       |   |   |      |       |       |   |   |      |       |       |

|     |   |   |      |      |       |   |   |      |       |       |   |   |      |      |       |   |   |      |       |       |   |   |      |      |       |   |   |      |      |       |   |   |      |       |       |   |   |      |      |       |
|-----|---|---|------|------|-------|---|---|------|-------|-------|---|---|------|------|-------|---|---|------|-------|-------|---|---|------|------|-------|---|---|------|------|-------|---|---|------|-------|-------|---|---|------|------|-------|
| 160 | H | E | 0.13 | 0.24 | 5.81  | H | E | 0.15 | 0.08  | 4.73  | H | E | 0.13 | 0.28 | 5.82  | H | E | 0.13 | 0.07  | 4.92  | H | E | 0.13 | 0.37 | 9.37  | H | E | 0.13 | 0.26 | 8.84  | H | E | 0.14 | 0.26  | 9.02  | H | E | 0.13 | 0.32 | 8.84  |
| 161 | H | E | 0.13 | 0.16 | 7.25  | H | E | 0.15 | -0.04 | 5.78  | H | E | 0.13 | 0.18 | 7.15  | H | E | 0.13 | -0.09 | 5.59  | H | E | 0.13 | 0.29 | 11.27 | H | E | 0.13 | 0.16 | 11.44 | H | E | 0.14 | 0.17  | 11.31 | H | E | 0.13 | 0.21 | 11.05 |
| 162 | H | E | 0.12 | 0.36 | 8.02  | H | E | 0.15 | 0.17  | 6.92  | H | E | 0.13 | 0.38 | 7.79  | H | E | 0.12 | 0.07  | 6.02  | H | E | 0.12 | 0.38 | 11.28 | H | E | 0.12 | 0.37 | 13.00 | H | E | 0.14 | 0.33  | 11.60 | H | E | 0.13 | 0.36 | 12.74 |
| 163 | H | E | 0.13 | 0.67 | 8.95  | H | E | 0.15 | 0.16  | 7.76  | H | E | 0.13 | 0.62 | 9.12  | H | E | 0.12 | 0.09  | 6.92  | H | E | 0.14 | 0.68 | 12.11 | H | E | 0.13 | 0.63 | 14.64 | H | E | 0.15 | 0.54  | 11.56 | H | E | 0.14 | 0.58 | 14.42 |
| 164 | H | E | 0.12 | 0.53 | 9.92  | H | E | 0.14 | -0.03 | 7.97  | H | E | 0.13 | 0.51 | 9.56  | H | E | 0.11 | -0.09 | 7.27  | H | E | 0.14 | 0.55 | 11.96 | H | E | 0.13 | 0.52 | 14.76 | H | E | 0.15 | 0.41  | 12.86 | H | E | 0.14 | 0.48 | 13.98 |
| 165 | H | E | 0.12 | 0.45 | 10.51 | H | E | 0.14 | 0.02  | 7.58  | H | E | 0.13 | 0.42 | 9.11  | H | E | 0.11 | -0.04 | 8.44  | H | E | 0.13 | 0.45 | 11.04 | H | E | 0.13 | 0.41 | 14.60 | H | E | 0.15 | 0.31  | 13.03 | H | E | 0.13 | 0.37 | 13.35 |
| 166 | H | E | 0.12 | 0.69 | 11.27 | H | E | 0.14 | 0.12  | 8.38  | H | E | 0.12 | 0.59 | 9.74  | H | E | 0.11 | 0.06  | 9.25  | H | E | 0.12 | 0.66 | 10.48 | H | E | 0.13 | 0.61 | 15.81 | H | E | 0.14 | 0.44  | 12.71 | H | E | 0.13 | 0.54 | 15.06 |
| 167 | H | E | 0.12 | 0.36 | 12.31 | H | E | 0.13 | -0.06 | 9.93  | H | E | 0.13 | 0.31 | 11.32 | H | E | 0.10 | -0.14 | 10.08 | H | E | 0.12 | 0.31 | 8.65  | H | E | 0.13 | 0.30 | 17.77 | H | E | 0.14 | 0.09  | 12.62 | H | E | 0.12 | 0.27 | 16.42 |
| 168 | H | B | 0.12 | 0.22 | 13.29 | H | E | 0.14 | 0.04  | 10.02 | H | B | 0.14 | 0.17 | 11.87 | H | E | 0.12 | -0.02 | 10.60 | H | B | 0.12 | 0.17 | 7.53  | H | B | 0.14 | 0.13 | 18.32 | H | B | 0.15 | -0.06 | 12.47 | H | B | 0.12 | 0.11 | 16.15 |
| 169 | H | E | 0.12 | 0.23 | 14.18 | H | E | 0.13 | 0.18  | 10.21 | H | E | 0.13 | 0.22 | 12.35 | H | E | 0.11 | 0.16  | 11.80 | H | E | 0.12 | 0.15 | 7.68  | H | E | 0.13 | 0.21 | 18.83 | H | E | 0.14 | 0.04  | 11.40 | H | E | 0.12 | 0.18 | 17.29 |
| 170 | H | E | 0.12 | 0.15 | 15.06 | H | E | 0.14 | 0.27  | 11.38 | H | E | 0.14 | 0.17 | 13.39 | H | E | 0.11 | 0.25  | 12.63 | H | E | 0.12 | 0.09 | 7.78  | H | E | 0.13 | 0.18 | 20.33 | H | E | 0.15 | -0.03 | 11.29 | H | E | 0.12 | 0.16 | 18.89 |
| 171 | H | E | 0.13 | 0.18 | 16.16 | H | E | 0.14 | 0.16  | 12.72 | H | E | 0.13 | 0.08 | 14.25 | H | E | 0.11 | 0.13  | 13.56 | H | E | 0.13 | 0.22 | 6.99  | H | E | 0.13 | 0.09 | 22.07 | H | E | 0.15 | -0.01 | 11.40 | H | E | 0.12 | 0.10 | 18.86 |
| 172 | H | B | 0.12 | 0.21 | 16.98 | C | B | 0.14 | 0.09  | 12.76 | H | B | 0.12 | 0.12 | 13.61 | H | E | 0.11 | 0.09  | 13.78 | H | B | 0.13 | 0.27 | 7.16  | H | B | 0.12 | 0.15 | 22.86 | H | B | 0.15 | 0.08  | 11.77 | H | B | 0.12 | 0.19 | 17.91 |
| 173 | H | E | 0.12 | 0.30 | 17.43 | H | E | 0.13 | 0.16  | 13.20 | H | E | 0.12 | 0.30 | 13.99 | H | E | 0.10 | 0.17  | 14.21 | H | E | 0.13 | 0.34 | 6.92  | H | E | 0.12 | 0.31 | 23.05 | H | E | 0.15 | 0.22  | 10.48 | H | E | 0.12 | 0.32 | 18.67 |
| 174 | H | E | 0.12 | 0.50 | 18.30 | H | E | 0.12 | 0.50  | 14.53 | H | E | 0.11 | 0.49 | 15.38 | H | E | 0.10 | 0.47  | 15.05 | H | E | 0.12 | 0.50 | 8.24  | H | E | 0.12 | 0.38 | 24.51 | H | E | 0.14 | 0.38  | 9.23  | H | E | 0.12 | 0.41 | 19.85 |
| 175 | H | E | 0.09 | 0.46 | 19.16 | H | E | 0.10 | 0.59  | 15.26 | H | E | 0.08 | 0.39 | 14.94 | H | E | 0.09 | 0.57  | 16.18 | H | E | 0.10 | 0.47 | 9.68  | H | E | 0.08 | 0.40 | 26.51 | H | E | 0.11 | 0.40  | 10.87 | H | E | 0.08 | 0.59 | 19.76 |
| 176 | H | E | 0.09 | 0.52 | 20.00 | H | E | 0.10 | 0.54  | 14.63 | H | E | 0.08 | 0.44 | 14.43 | H | E | 0.09 | 0.53  | 16.80 | H | E | 0.10 | 0.55 | 10.16 | H | E | 0.08 | 0.48 | 27.05 | H | E | 0.11 | 0.49  | 10.44 | H | E | 0.08 | 0.60 | 19.46 |
| 177 | H | E | 0.08 | 0.54 | 20.87 | H | E | 0.10 | 0.57  | 15.38 | H | E | 0.08 | 0.51 | 15.80 | H | E | 0.08 | 0.62  | 17.00 | H | E | 0.09 | 0.60 | 9.93  | H | E | 0.09 | 0.56 | 27.57 | C | E | 0.08 | 1.18  | 10.87 | H | E | 0.08 | 0.66 | 20.77 |
| 178 | C | E | 0.08 | 0.53 | 21.92 | C | E | 0.10 | 0.52  | 16.96 | C | E | 0.08 | 0.51 | 16.59 | C | E | 0.10 | 0.54  | 17.71 | C | E | 0.10 | 0.56 | 9.96  | C | E | 0.09 | 0.55 | 27.77 | C | E | 0.08 | 1.19  | 11.00 | C | E | 0.08 | 0.67 | 21.66 |
| 179 | C | E | 0.07 | 0.64 | 22.14 | C | E | 0.11 | 0.44  | 17.16 | C | E | 0.08 | 0.59 | 17.36 | C | E | 0.10 | 0.48  | 19.26 | C | E | 0.09 | 0.66 | 10.09 | C | E | 0.08 | 0.63 | 28.30 | C | E | 0.08 | 1.10  | 12.06 | C | E | 0.08 | 0.63 | 21.28 |
| 180 | C | E | 0.06 | 0.50 | 21.24 | C | E | 0.12 | 0.42  | 16.90 | C | E | 0.08 | 0.48 | 16.62 | C | E | 0.09 | 0.42  | 19.47 | C | E | 0.08 | 0.49 | 9.68  | C | E | 0.08 | 0.43 | 27.68 | C | E | 0.09 | 0.58  | 11.61 | C | E | 0.09 | 0.35 | 20.28 |
| 181 | C | E | 0.06 | 0.60 | 20.09 | C | E | 0.10 | 0.61  | 16.46 | C | E | 0.08 | 0.60 | 16.82 | C | E | 0.08 | 0.62  | 18.94 | C | E | 0.08 | 0.59 | 9.22  | C | E | 0.08 | 0.57 | 26.19 | C | E | 0.11 | 0.38  | 12.31 | C | E | 0.09 | 0.48 | 19.48 |
| 182 | C | E | 0.07 | 0.59 | 19.09 | C | E | 0.10 | 0.63  | 16.34 | C | E | 0.08 | 0.59 | 16.71 | C | E | 0.07 | 0.63  | 19.10 | C | E | 0.08 | 0.59 | 9.94  | C | E | 0.08 | 0.55 | 25.64 | C | E | 0.11 | 0.31  | 11.84 | C | E | 0.09 | 0.42 | 19.15 |
| 183 | C | E | 0.08 | 0.21 | 17.93 | C | E | 0.11 | 0.46  | 15.96 | C | E | 0.10 | 0.27 | 16.97 | C | E | 0.07 | 0.47  | 18.38 | C | E | 0.10 | 0.22 | 10.10 | C | E | 0.10 | 0.25 | 24.82 | C | E | 0.13 | 0.22  | 11.90 | C | E | 0.11 | 0.25 | 18.79 |
| 184 | C | E | 0.08 | 0.20 | 16.97 | C | E | 0.10 | 0.34  | 16.04 | C | E | 0.10 | 0.16 | 17.08 | C | E | 0.07 | 0.36  | 18.36 | C | E | 0.10 | 0.19 | 11.18 | C | E | 0.10 | 0.24 | 24.80 | C | E | 0.13 | 0.25  | 12.20 | C | E | 0.10 | 0.34 | 18.91 |
| 185 | C | E | 0.07 | 0.49 | 16.14 | C | E | 0.10 | 0.79  | 15.95 | C | E | 0.09 | 0.54 | 17.01 | C | E | 0.07 | 0.78  | 17.97 | C | E | 0.09 | 0.49 | 12.18 | C | E | 0.09 | 0.50 | 25.15 | C | E | 0.12 | 0.34  | 12.86 | C | E | 0.08 | 0.49 | 19.00 |
| 186 | C | E | 0.06 | 0.10 | 15.28 | C | E | 0.10 | 1.02  | 15.89 | C | E | 0.09 | 0.54 | 17.19 | C | E | 0.07 | 0.96  | 17.87 | C | E | 0.08 | 0.10 | 13.03 | C | E | 0.08 | 0.14 | 24.95 | C | E | 0.11 | 0.04  | 12.86 | C | E | 0.07 | 0.14 | 19.01 |
| 187 | C | E | 0.07 | 0.16 | 14.54 | C | E | 0.10 | 0.86  | 15.48 | C | E | 0.08 | 0.17 | 17.03 | C | E | 0.07 | 0.85  | 16.96 | C | E | 0.08 | 0.16 | 11.71 | C | E | 0.08 | 0.17 | 24.00 | C | E | 0.09 | 0.13  | 11.42 | C | E | 0.06 | 0.20 | 18.88 |
| 188 | C | E | 0.07 | 0.28 | 14.37 | C | E | 0.10 | 0.58  | 14.73 | C | E | 0.08 | 0.29 | 16.94 | C | E | 0.07 | 0.58  | 16.02 | C | E | 0.08 | 0.31 | 11.06 | C | E | 0.08 | 0.31 | 23.28 | C | E | 0.09 | 0.34  | 10.76 | C | E | 0.05 | 0.35 | 18.59 |
| 189 | C | E | 0.07 | 0.71 | 14.14 | C | E | 0.09 | 0.46  | 14.27 | C | E | 0.08 | 0.73 | 16.30 | C | E | 0.06 | 0.55  | 16.33 | C | E | 0.07 | 0.70 | 9.36  | C | E | 0.08 | 0.73 | 23.22 | C | E | 0.09 | 0.76  | 9.75  | C | E | 0.05 | 0.75 | 17.68 |
| 190 | C | E | 0.07 | 0.94 | 13.33 | C | E | 0.09 | 0.40  | 14.19 | C | E | 0.08 | 1.03 | 14.90 | C | E | 0.07 | 0.38  | 16.58 | C | E | 0.07 | 0.91 | 8.51  | C | E | 0.08 | 0.98 | 22.48 | C | E | 0.09 | 1.03  | 9.07  | C | E | 0.05 | 1.03 | 18.03 |
| 191 | C | E | 0.07 | 0.73 | 12.08 | C | E | 0.07 | 0.32  | 13.38 | C | E | 0.07 | 0.77 | 14.06 | C | E | 0.07 | 0.21  | 15.29 | C | E | 0.08 | 0.73 | 6.68  | C | E | 0.08 | 0.78 | 21.22 | C | E | 0.10 | 0.74  | 7.54  | C | E | 0.05 | 0.82 | 17.57 |
| 192 | C | E | 0.09 | 0.78 | 11.27 | C | E | 0.09 | 0.44  | 12.31 | C | E | 0.08 | 0.65 | 12.83 | C | E | 0.07 | 0.71  | 13.87 | C | E | 0.10 | 0.81 | 6.05  | C | E | 0.10 | 0.80 | 19.78 | C | E | 0.12 | 0.55  | 6.05  | C | E | 0.08 | 0.81 | 16.83 |
| 193 | C | E | 0.10 | 0.66 | 10.79 | C | E | 0.10 | 0.72  | 11.29 | C | E | 0.08 | 0.60 | 11.50 | C | E | 0.07 | 0.74  | 12.60 | C | E | 0.10 | 0.69 | 6.11  | C | E | 0.10 | 0.67 | 18.27 | C | E | 0.12 | 0.48  | 6.06  | C | E | 0.08 | 0.64 | 16.03 |
| 194 | C | E | 0.10 | 0.35 | 10.32 | C | E | 0.08 | 0.26  | 10.39 | C | E | 0.08 | 0.35 | 10.36 | C | E | 0.06 | 0.30  | 11.04 | C | E | 0.09 | 0.37 | 6.06  | C | E | 0.09 | 0.33 | 16.78 | C | E | 0.12 | 0.25  | 6.04  | C | E | 0.08 | 0.35 | 14.58 |
| 195 | C | E | 0.09 | 0.32 | 10.20 | C | E | 0.08 | 0.22  | 9.36  | C | E | 0.07 | 0.31 | 9.93  | C | E | 0.06 | 0.27  | 9.42  | C | E | 0.08 | 0.37 | 6.02  | C | E | 0.08 | 0.34 | 14.96 | C | E | 0.11 | 0.13  | 6.01  | C | E | 0.07 | 0.29 | 13.72 |
| 196 | C | E | 0.10 | 0.46 | 9.89  | C | E | 0.08 | 0.40  | 8.06  | C | E | 0.08 | 0.46 | 9.58  | C | E | 0.07 | 0.45  | 7.73  | C | E | 0.10 | 0.52 | 6.01  | C | E | 0.09 | 0.47 | 12.91 | C | E | 0.12 | 0.20  | 6.02  | C | E | 0.08 | 0.47 | 12.52 |
| 197 | C | E | 0.11 | 0.39 | 9.11  | C | E | 0.08 | 0.72  | 6.81  | C | E | 0.08 | 0.37 | 8.82  | C | E | 0.07 | 0.77  | 6.96  | C | E | 0.11 | 0.43 | 5.99  | C | E | 0.10 | 0.39 | 11.42 | C | E | 0.12 | 0.35  | 6.10  | C | E | 0.08 | 0.41 | 11.40 |
| 198 | C | E | 0.12 | 0.55 | 7.72  | C | E | 0.10 | 0.93  | 5.20  | C | E | 0.10 | 0.47 | 7.86  | C | E | 0.08 | 1.02  | 5.71  | C | E | 0.12 | 0.53 | 5.88  | C | E | 0.12 | 0.52 | 9.66  | C | E | 0.12 | 0.50  | 6.01  | C | E | 0.10 | 0.55 | 9.66  |
| 199 | C | E | 0.12 | 0.13 | 6.55  | C | E | 0.08 |       |       |   |   |      |      |       |   |   |      |       |       |   |   |      |      |       |   |   |      |      |       |   |   |      |       |       |   |   |      |      |       |

|     |   |   |      |       |       |   |   |      |       |       |   |   |      |       |       |   |   |      |      |       |   |   |      |       |       |   |   |      |       |       |   |   |      |       |       |   |   |      |       |       |
|-----|---|---|------|-------|-------|---|---|------|-------|-------|---|---|------|-------|-------|---|---|------|------|-------|---|---|------|-------|-------|---|---|------|-------|-------|---|---|------|-------|-------|---|---|------|-------|-------|
| 214 | C | E | 0.08 | 0.02  | 4.55  | C | E | 0.07 | 0.32  | 12.95 | C | E | 0.08 | 0.04  | 16.35 | C | E | 0.06 | 0.30 | 13.34 | C | E | 0.08 | 0.02  | 12.07 | C | E | 0.08 | 0.09  | 6.39  | C | E | 0.09 | 0.08  | 10.90 | C | E | 0.08 | 0.05  | 13.91 |
| 215 | C | E | 0.08 | 0.07  | 4.56  | C | E | 0.07 | 0.32  | 11.95 | C | E | 0.08 | 0.06  | 16.54 | C | E | 0.07 | 0.15 | 12.75 | C | E | 0.09 | 0.04  | 12.85 | C | E | 0.08 | -0.00 | 6.47  | C | E | 0.10 | -0.08 | 10.75 | C | E | 0.08 | 0.08  | 13.28 |
| 216 | C | E | 0.08 | 0.16  | 4.49  | C | E | 0.07 | 0.23  | 11.39 | C | E | 0.08 | 0.15  | 18.24 | C | E | 0.07 | 0.28 | 14.20 | C | E | 0.09 | 0.10  | 13.19 | C | E | 0.08 | 0.10  | 6.42  | C | E | 0.09 | 0.07  | 11.00 | C | E | 0.08 | 0.20  | 12.82 |
| 217 | C | E | 0.09 | 0.25  | 4.48  | C | E | 0.07 | 0.28  | 11.77 | C | E | 0.10 | 0.33  | 17.87 | C | E | 0.07 | 0.27 | 14.36 | C | E | 0.10 | 0.23  | 12.60 | C | E | 0.10 | 0.35  | 6.39  | C | E | 0.11 | 0.17  | 11.03 | C | E | 0.11 | 0.37  | 12.43 |
| 218 | C | E | 0.10 | 0.26  | 4.52  | C | E | 0.08 | 0.36  | 10.55 | C | E | 0.09 | 0.23  | 16.12 | C | E | 0.06 | 0.26 | 12.76 | C | E | 0.11 | 0.24  | 12.51 | C | E | 0.12 | 0.25  | 6.35  | C | E | 0.11 | 0.11  | 12.02 | C | E | 0.10 | 0.25  | 11.86 |
| 219 | C | E | 0.08 | 0.04  | 4.49  | C | E | 0.08 | 0.38  | 10.21 | C | E | 0.08 | 0.03  | 16.21 | C | E | 0.06 | 0.26 | 13.71 | C | E | 0.09 | 0.08  | 13.69 | C | E | 0.10 | 0.17  | 6.32  | C | E | 0.10 | 0.12  | 12.52 | C | E | 0.08 | 0.07  | 11.19 |
| 220 | C | E | 0.09 | 0.05  | 4.46  | C | E | 0.09 | 0.47  | 10.56 | C | E | 0.08 | 0.06  | 14.76 | C | E | 0.07 | 0.09 | 13.70 | C | E | 0.10 | 0.07  | 13.21 | C | E | 0.10 | 0.22  | 6.30  | C | E | 0.10 | 0.15  | 13.50 | C | E | 0.09 | 0.05  | 10.18 |
| 221 | C | E | 0.08 | -0.03 | 5.03  | C | E | 0.08 | 0.36  | 9.27  | C | E | 0.07 | -0.01 | 12.85 | C | E | 0.05 | 0.25 | 12.37 | C | E | 0.09 | 0.01  | 13.66 | C | E | 0.09 | 0.13  | 7.20  | C | E | 0.10 | 0.10  | 13.70 | C | E | 0.08 | -0.03 | 9.52  |
| 222 | C | E | 0.06 | -0.02 | 6.01  | C | E | 0.07 | 0.26  | 8.13  | C | E | 0.05 | 0.00  | 11.16 | C | E | 0.04 | 0.36 | 11.71 | C | E | 0.08 | 0.01  | 14.30 | C | E | 0.09 | 0.09  | 7.95  | C | E | 0.08 | 0.07  | 15.16 | C | E | 0.06 | -0.06 | 8.53  |
| 223 | C | E | 0.05 | -0.09 | 7.30  | C | E | 0.07 | 0.38  | 9.04  | C | E | 0.06 | -0.07 | 9.42  | C | E | 0.04 | 0.30 | 12.08 | C | E | 0.07 | -0.08 | 14.69 | C | E | 0.07 | 0.14  | 8.98  | C | E | 0.08 | 0.08  | 16.43 | C | E | 0.05 | -0.11 | 8.40  |
| 224 | C | E | 0.06 | 0.33  | 8.39  | C | E | 0.07 | 0.29  | 10.38 | C | E | 0.08 | 0.31  | 7.74  | C | E | 0.05 | 0.32 | 11.12 | C | E | 0.08 | 0.39  | 15.36 | C | E | 0.09 | 0.33  | 10.44 | C | E | 0.08 | 0.17  | 17.85 | C | E | 0.06 | 0.28  | 7.25  |
| 225 | C | E | 0.07 | 0.30  | 9.08  | C | E | 0.08 | 0.06  | 10.96 | C | E | 0.08 | 0.30  | 6.27  | C | E | 0.06 | 0.30 | 10.22 | C | E | 0.08 | 0.35  | 15.44 | C | E | 0.09 | 0.32  | 11.22 | C | E | 0.08 | 0.16  | 18.98 | C | E | 0.07 | 0.29  | 7.39  |
| 226 | C | E | 0.09 | 0.28  | 8.85  | C | E | 0.07 | -0.00 | 11.29 | C | E | 0.09 | 0.29  | 5.10  | C | E | 0.07 | 0.25 | 9.95  | C | E | 0.08 | 0.29  | 14.63 | C | E | 0.09 | 0.30  | 11.57 | C | E | 0.08 | 0.11  | 18.06 | C | E | 0.09 | 0.32  | 6.32  |
| 227 | C | E | 0.08 | 0.24  | 8.81  | C | E | 0.07 | 0.10  | 11.59 | C | E | 0.08 | 0.27  | 5.07  | C | E | 0.06 | 0.25 | 10.19 | C | E | 0.07 | 0.25  | 13.36 | C | E | 0.08 | 0.27  | 11.95 | C | E | 0.08 | 0.14  | 17.88 | C | E | 0.08 | 0.26  | 6.32  |
| 228 | C | E | 0.08 | 0.18  | 8.59  | C | E | 0.07 | -0.09 | 12.22 | C | E | 0.08 | 0.20  | 5.14  | C | E | 0.06 | 0.20 | 11.33 | C | E | 0.08 | 0.21  | 12.84 | C | E | 0.09 | 0.12  | 13.20 | C | E | 0.08 | 0.06  | 17.99 | C | E | 0.08 | 0.16  | 6.35  |
| 229 | C | E | 0.09 | 0.29  | 8.75  | C | E | 0.07 | 0.04  | 11.87 | C | E | 0.09 | 0.30  | 5.24  | C | E | 0.06 | 0.30 | 11.05 | C | E | 0.08 | 0.29  | 12.83 | C | E | 0.09 | 0.22  | 13.34 | C | E | 0.08 | 0.10  | 17.66 | C | E | 0.10 | 0.25  | 6.46  |
| 230 | C | E | 0.10 | 0.18  | 8.46  | C | E | 0.07 | 0.11  | 11.05 | C | E | 0.10 | 0.21  | 5.12  | C | E | 0.06 | 0.27 | 10.35 | C | E | 0.08 | 0.20  | 11.90 | C | E | 0.10 | 0.13  | 12.86 | C | E | 0.09 | 0.15  | 16.59 | C | E | 0.12 | 0.15  | 6.38  |
| 231 | C | E | 0.08 | -0.14 | 7.33  | C | E | 0.08 | 0.06  | 10.06 | C | E | 0.08 | -0.13 | 5.11  | C | E | 0.06 | 0.18 | 9.54  | C | E | 0.07 | -0.16 | 11.25 | C | E | 0.08 | -0.15 | 12.59 | C | E | 0.08 | -0.05 | 15.23 | C | E | 0.10 | -0.19 | 6.38  |
| 232 | C | E | 0.08 | 0.29  | 6.04  | C | E | 0.07 | 0.15  | 9.13  | C | E | 0.08 | 0.26  | 5.16  | C | E | 0.06 | 0.13 | 8.20  | C | E | 0.07 | 0.26  | 10.42 | C | E | 0.08 | 0.27  | 12.71 | C | E | 0.08 | 0.14  | 13.19 | C | E | 0.10 | 0.22  | 6.39  |
| 233 | C | E | 0.09 | 0.43  | 5.73  | C | E | 0.07 | 0.39  | 7.68  | C | E | 0.09 | 0.40  | 5.10  | C | E | 0.07 | 0.38 | 6.28  | C | E | 0.08 | 0.41  | 9.68  | C | E | 0.08 | 0.40  | 11.58 | C | E | 0.08 | 0.37  | 11.52 | C | E | 0.11 | 0.37  | 6.38  |
| 234 | C | E | 0.08 | 0.35  | 6.26  | C | E | 0.07 | 0.22  | 6.48  | C | E | 0.08 | 0.34  | 5.06  | C | E | 0.06 | 0.24 | 5.48  | C | E | 0.07 | 0.32  | 8.78  | C | E | 0.08 | 0.19  | 10.96 | C | E | 0.07 | 0.21  | 9.49  | C | E | 0.09 | 0.32  | 6.35  |
| 235 | C | E | 0.08 | 0.34  | 6.81  | C | E | 0.07 | 0.35  | 5.42  | C | E | 0.08 | 0.35  | 5.17  | C | E | 0.07 | 0.37 | 5.05  | C | E | 0.08 | 0.33  | 8.19  | C | E | 0.08 | 0.21  | 10.31 | C | E | 0.08 | 0.33  | 7.70  | C | E | 0.09 | 0.33  | 6.44  |
| 236 | C | E | 0.10 | 0.34  | 8.31  | C | E | 0.08 | 0.40  | 4.71  | C | E | 0.10 | 0.34  | 5.15  | C | E | 0.08 | 0.37 | 4.23  | C | E | 0.09 | 0.35  | 6.25  | C | E | 0.08 | 0.35  | 10.49 | C | E | 0.09 | 0.36  | 6.50  | C | E | 0.11 | 0.34  | 6.36  |
| 237 | C | E | 0.09 | 0.27  | 8.69  | C | E | 0.07 | 0.23  | 4.63  | C | E | 0.10 | 0.26  | 5.03  | C | E | 0.07 | 0.26 | 4.32  | C | E | 0.09 | 0.25  | 6.48  | C | E | 0.08 | 0.34  | 10.22 | C | E | 0.08 | 0.24  | 6.45  | C | E | 0.10 | 0.27  | 6.28  |
| 238 | C | E | 0.10 | 0.34  | 9.37  | C | E | 0.08 | 0.19  | 5.42  | C | E | 0.09 | 0.34  | 5.03  | C | E | 0.07 | 0.18 | 4.39  | C | E | 0.10 | 0.35  | 6.80  | C | E | 0.08 | 0.46  | 10.47 | C | E | 0.09 | 0.19  | 6.41  | C | E | 0.11 | 0.34  | 6.24  |
| 239 | C | E | 0.10 | 0.28  | 10.14 | C | E | 0.07 | 0.18  | 6.07  | C | E | 0.09 | 0.27  | 5.12  | C | E | 0.07 | 0.18 | 4.47  | C | E | 0.09 | 0.28  | 6.38  | C | E | 0.08 | 0.38  | 9.88  | C | E | 0.09 | 0.17  | 6.38  | C | E | 0.10 | 0.25  | 6.43  |
| 240 | C | E | 0.08 | 0.44  | 9.53  | C | E | 0.05 | 0.36  | 5.79  | C | E | 0.07 | 0.41  | 6.19  | C | E | 0.04 | 0.34 | 4.96  | C | E | 0.07 | 0.42  | 8.18  | C | E | 0.07 | 0.41  | 11.47 | C | E | 0.07 | 0.36  | 7.87  | C | E | 0.08 | 0.42  | 8.16  |
| 241 | C | E | 0.08 | 0.47  | 9.37  | C | E | 0.04 | 0.42  | 6.35  | C | E | 0.07 | 0.44  | 7.10  | C | E | 0.04 | 0.41 | 5.64  | C | E | 0.07 | 0.45  | 9.70  | C | E | 0.07 | 0.44  | 12.69 | C | E | 0.06 | 0.44  | 9.27  | C | E | 0.08 | 0.49  | 9.72  |
| 242 | C | E | 0.08 | 0.49  | 9.29  | C | E | 0.04 | 0.46  | 6.79  | C | E | 0.07 | 0.49  | 8.05  | C | E | 0.04 | 0.44 | 6.41  | C | E | 0.07 | 0.50  | 11.21 | C | E | 0.08 | 0.45  | 14.19 | C | E | 0.06 | 0.47  | 10.17 | C | E | 0.08 | 0.55  | 10.77 |
| 243 | C | E | 0.07 | 0.41  | 9.48  | C | E | 0.04 | 0.37  | 7.28  | C | E | 0.06 | 0.40  | 8.95  | C | E | 0.04 | 0.39 | 7.00  | C | E | 0.06 | 0.40  | 12.19 | C | E | 0.08 | 0.28  | 14.70 | C | E | 0.05 | 0.41  | 10.47 | C | E | 0.07 | 0.49  | 11.57 |
| 244 | C | E | 0.06 | 0.18  | 9.08  | C | E | 0.04 | 0.28  | 7.18  | C | E | 0.05 | 0.16  | 8.54  | C | E | 0.04 | 0.23 | 6.89  | C | E | 0.05 | 0.16  | 11.83 | C | E | 0.06 | -0.03 | 13.56 | C | E | 0.05 | 0.27  | 10.11 | C | E | 0.06 | 0.25  | 11.89 |
| 245 | C | E | 0.06 | 0.31  | 8.70  | C | E | 0.04 | 0.35  | 7.13  | C | E | 0.05 | 0.26  | 7.76  | C | E | 0.04 | 0.31 | 6.77  | C | E | 0.05 | 0.26  | 12.17 | C | E | 0.06 | 0.28  | 11.99 | C | E | 0.05 | 0.33  | 10.13 | C | E | 0.06 | 0.32  | 11.13 |
| 246 | C | E | 0.06 | 0.39  | 7.87  | C | E | 0.04 | 0.39  | 6.86  | C | E | 0.06 | 0.36  | 7.19  | C | E | 0.04 | 0.38 | 6.46  | C | E | 0.05 | 0.36  | 11.83 | C | E | 0.06 | 0.38  | 10.34 | C | E | 0.06 | 0.39  | 9.35  | C | E | 0.06 | 0.39  | 10.55 |
| 247 | C | E | 0.08 | 0.34  | 6.12  | C | E | 0.06 | 0.31  | 5.48  | C | E | 0.08 | 0.30  | 6.00  | C | E | 0.06 | 0.30 | 5.49  | C | E | 0.08 | 0.30  | 9.66  | C | E | 0.07 | 0.31  | 8.73  | C | E | 0.08 | 0.31  | 7.60  | C | E | 0.08 | 0.32  | 8.38  |
| 248 | C | E | 0.07 | 0.29  | 4.84  | C | E | 0.06 | 0.26  | 4.58  | C | E | 0.07 | 0.24  | 5.13  | C | E | 0.06 | 0.27 | 4.71  | C | E | 0.07 | 0.25  | 7.10  | C | E | 0.07 | 0.26  | 7.11  | C | E | 0.07 | 0.28  | 6.58  | C | E | 0.07 | 0.28  | 6.72  |
| 249 | C | E | 0.08 | 0.32  | 4.64  | C | E | 0.07 | 0.29  | 4.56  | C | E | 0.08 | 0.27  | 4.94  | C | E | 0.07 | 0.30 | 4.36  | C | E | 0.08 | 0.29  | 5.89  | C | E | 0.08 | 0.29  | 6.50  | C | E | 0.08 | 0.28  | 6.02  | C | E | 0.08 | 0.28  | 6.25  |
| 250 | C | E | 0.08 | 0.37  | 4.54  | C | E | 0.07 | 0.35  | 4.36  | C | E | 0.08 | 0.30  | 5.05  | C | E | 0.07 | 0.35 | 4.30  | C | E | 0.08 | 0.32  | 6.01  | C | E | 0.08 | 0.32  | 6.31  | C | E | 0.08 | 0.30  | 6.05  | C | E | 0.08 | 0.29  | 6.29  |
| 251 | C | E | 0.08 | 0.31  | 4.57  | C | E | 0.07 | 0.33  | 4.51  | C | E | 0.08 | 0.25  | 5.06  | C | E | 0.07 | 0.29 | 4.41  | C | E | 0.08 | 0.30  | 6.03  | C | E | 0.08 | 0.31  | 6.36  | C | E | 0.08 | 0.28  | 6.04  | C | E | 0.08 | 0.28  | 6.26  |
| 252 | C | E | 0.08 | 0.34  | 4.49  | C | E | 0.07 | 0.30  | 4.43  | C | E | 0.08 | 0.27  | 4.94  | C | E | 0.07 | 0.29 | 4.38  | C | E | 0.08 | 0.30  | 5.99  | C | E | 0.08 | 0.30  | 6.30  | C | E | 0.08 | 0.28  | 6.00  | C | E | 0.09 | 0.26  | 6.17  |
| 253 | C | E | 0.08 | 0.29  | 4.47  | C | E | 0.07 | 0.22  | 4.41  | C | E | 0.08 | 0.22  | 4.93  | C | E | 0.07 | 0.25 | 4.34  | C | E | 0.   |       |       |   |   |      |       |       |   |   |      |       |       |   |   |      |       |       |



|     |   |   |      |      |       |   |   |      |      |       |   |   |      |      |       |   |   |      |      |       |   |   |      |      |       |   |   |      |      |       |   |   |      |       |       |   |   |      |      |       |
|-----|---|---|------|------|-------|---|---|------|------|-------|---|---|------|------|-------|---|---|------|------|-------|---|---|------|------|-------|---|---|------|------|-------|---|---|------|-------|-------|---|---|------|------|-------|
| 268 | C | E | 0.06 | 0.18 | 9.59  | C | E | 0.05 | 0.22 | 7.29  | C | E | 0.06 | 0.18 | 8.08  | C | E | 0.04 | 0.24 | 8.24  | C | E | 0.06 | 0.18 | 10.71 | C | E | 0.06 | 0.20 | 6.71  | C | E | 0.06 | 0.18  | 10.98 | C | E | 0.07 | 0.20 | 13.41 |
| 269 | C | E | 0.05 | 0.19 | 10.02 | C | E | 0.04 | 0.24 | 7.79  | C | E | 0.05 | 0.19 | 8.02  | C | E | 0.03 | 0.22 | 8.31  | C | E | 0.05 | 0.19 | 11.36 | C | E | 0.06 | 0.22 | 6.73  | C | E | 0.05 | 0.21  | 11.12 | C | E | 0.05 | 0.20 | 13.48 |
| 270 | C | E | 0.05 | 0.26 | 10.37 | C | E | 0.04 | 0.26 | 7.50  | C | E | 0.05 | 0.28 | 8.02  | C | E | 0.03 | 0.30 | 8.48  | C | E | 0.05 | 0.20 | 12.03 | C | E | 0.05 | 0.27 | 7.71  | C | E | 0.05 | 0.29  | 12.12 | C | E | 0.05 | 0.26 | 14.06 |
| 271 | C | E | 0.05 | 0.30 | 10.50 | C | E | 0.04 | 0.29 | 7.55  | C | E | 0.05 | 0.34 | 8.26  | C | E | 0.03 | 0.31 | 9.32  | C | E | 0.05 | 0.27 | 12.92 | C | E | 0.05 | 0.27 | 9.06  | C | E | 0.05 | 0.30  | 11.65 | C | E | 0.05 | 0.29 | 14.04 |
| 272 | C | E | 0.05 | 0.41 | 10.96 | C | E | 0.04 | 0.39 | 7.71  | C | E | 0.05 | 0.43 | 8.30  | C | E | 0.03 | 0.40 | 9.57  | C | E | 0.05 | 0.37 | 13.43 | C | E | 0.05 | 0.38 | 9.62  | C | E | 0.05 | 0.37  | 12.49 | C | E | 0.05 | 0.39 | 14.33 |
| 273 | C | E | 0.05 | 0.30 | 11.79 | C | E | 0.04 | 0.28 | 8.64  | C | E | 0.05 | 0.29 | 8.44  | C | E | 0.03 | 0.26 | 9.86  | C | E | 0.05 | 0.23 | 12.87 | C | E | 0.05 | 0.26 | 10.68 | C | E | 0.05 | 0.27  | 13.18 | C | E | 0.05 | 0.28 | 14.08 |
| 274 | C | E | 0.05 | 0.24 | 12.51 | C | E | 0.04 | 0.24 | 9.67  | C | E | 0.05 | 0.23 | 9.07  | C | E | 0.03 | 0.23 | 10.43 | C | E | 0.05 | 0.21 | 12.44 | C | E | 0.05 | 0.22 | 11.22 | C | E | 0.05 | 0.23  | 14.02 | C | E | 0.05 | 0.25 | 14.19 |
| 275 | C | E | 0.05 | 0.28 | 12.78 | C | E | 0.04 | 0.29 | 10.78 | C | E | 0.05 | 0.27 | 9.32  | C | E | 0.03 | 0.27 | 10.10 | C | E | 0.05 | 0.27 | 12.27 | C | E | 0.05 | 0.26 | 11.82 | C | E | 0.05 | 0.27  | 14.42 | C | E | 0.05 | 0.29 | 14.27 |
| 276 | C | E | 0.05 | 0.26 | 11.89 | C | E | 0.04 | 0.29 | 10.05 | C | E | 0.05 | 0.25 | 8.99  | C | E | 0.03 | 0.27 | 8.96  | C | E | 0.05 | 0.27 | 12.96 | C | E | 0.05 | 0.27 | 11.90 | C | E | 0.05 | 0.25  | 14.09 | C | E | 0.05 | 0.29 | 12.99 |
| 277 | C | E | 0.05 | 0.24 | 11.29 | C | E | 0.04 | 0.28 | 9.62  | C | E | 0.05 | 0.22 | 8.81  | C | E | 0.03 | 0.27 | 8.65  | C | E | 0.05 | 0.26 | 10.18 | C | E | 0.05 | 0.25 | 12.64 | C | E | 0.05 | 0.24  | 13.81 | C | E | 0.05 | 0.26 | 12.63 |
| 278 | C | E | 0.05 | 0.19 | 10.52 | C | E | 0.05 | 0.27 | 9.10  | C | E | 0.05 | 0.19 | 8.38  | C | E | 0.04 | 0.23 | 7.65  | C | E | 0.05 | 0.23 | 9.73  | C | E | 0.05 | 0.19 | 12.76 | C | E | 0.05 | 0.22  | 12.67 | C | E | 0.05 | 0.22 | 11.49 |
| 279 | C | E | 0.05 | 0.13 | 10.01 | C | E | 0.05 | 0.23 | 8.51  | C | E | 0.05 | 0.13 | 7.85  | C | E | 0.04 | 0.21 | 7.41  | C | E | 0.05 | 0.13 | 10.17 | C | E | 0.05 | 0.11 | 13.54 | C | E | 0.05 | 0.18  | 12.08 | C | E | 0.05 | 0.18 | 11.21 |
| 280 | C | E | 0.06 | 0.31 | 9.00  | C | E | 0.06 | 0.36 | 7.97  | C | E | 0.06 | 0.30 | 7.09  | C | E | 0.05 | 0.27 | 6.98  | C | E | 0.06 | 0.32 | 8.98  | C | E | 0.06 | 0.28 | 13.34 | C | E | 0.06 | 0.35  | 11.38 | C | E | 0.06 | 0.30 | 10.54 |
| 281 | C | E | 0.05 | 0.31 | 9.06  | C | E | 0.04 | 0.33 | 7.33  | C | E | 0.05 | 0.27 | 7.44  | C | E | 0.03 | 0.34 | 7.21  | C | E | 0.05 | 0.28 | 9.97  | C | E | 0.05 | 0.34 | 13.54 | C | E | 0.05 | 0.31  | 11.50 | C | E | 0.05 | 0.26 | 10.54 |
| 282 | C | E | 0.06 | 0.12 | 8.42  | C | E | 0.05 | 0.14 | 7.02  | C | E | 0.06 | 0.13 | 7.53  | C | E | 0.04 | 0.13 | 7.02  | C | E | 0.06 | 0.09 | 10.41 | C | E | 0.05 | 0.38 | 12.80 | C | E | 0.06 | 0.13  | 11.67 | C | E | 0.06 | 0.11 | 10.75 |
| 283 | C | E | 0.05 | 0.38 | 8.00  | C | E | 0.03 | 0.37 | 7.08  | C | E | 0.05 | 0.38 | 7.33  | C | E | 0.03 | 0.41 | 6.91  | C | E | 0.05 | 0.36 | 10.39 | C | E | 0.05 | 0.44 | 11.49 | C | E | 0.05 | 0.40  | 11.37 | C | E | 0.05 | 0.40 | 10.78 |
| 284 | C | E | 0.05 | 0.27 | 7.15  | C | E | 0.05 | 0.20 | 6.93  | C | E | 0.05 | 0.28 | 6.52  | C | E | 0.04 | 0.29 | 6.43  | C | E | 0.06 | 0.22 | 9.26  | C | E | 0.05 | 0.42 | 9.52  | C | E | 0.05 | 0.20  | 9.88  | C | E | 0.05 | 0.28 | 9.82  |
| 285 | C | E | 0.06 | 0.23 | 6.34  | C | E | 0.05 | 0.19 | 6.20  | C | E | 0.05 | 0.21 | 5.72  | C | E | 0.05 | 0.21 | 5.83  | C | E | 0.06 | 0.17 | 7.88  | C | E | 0.05 | 0.41 | 7.53  | C | E | 0.05 | 0.16  | 8.35  | C | E | 0.06 | 0.21 | 8.43  |
| 286 | C | E | 0.08 | 0.17 | 5.16  | C | E | 0.06 | 0.39 | 4.88  | C | E | 0.08 | 0.20 | 5.29  | C | E | 0.08 | 0.19 | 4.54  | C | E | 0.09 | 0.14 | 6.55  | C | E | 0.08 | 0.42 | 6.78  | C | E | 0.08 | 0.41  | 6.52  | C | E | 0.08 | 0.24 | 6.70  |
| 287 | C | E | 0.08 | 0.29 | 4.77  | C | E | 0.07 | 0.35 | 5.01  | C | E | 0.08 | 0.25 | 5.39  | C | E | 0.08 | 0.27 | 4.62  | C | E | 0.09 | 0.29 | 6.06  | C | E | 0.08 | 0.30 | 6.67  | C | E | 0.08 | 0.31  | 6.09  | C | E | 0.08 | 0.33 | 6.43  |
| 288 | C | E | 0.08 | 0.16 | 4.75  | C | E | 0.07 | 0.21 | 4.71  | C | E | 0.08 | 0.18 | 5.34  | C | E | 0.07 | 0.17 | 4.47  | C | E | 0.09 | 0.17 | 6.10  | C | E | 0.07 | 0.25 | 6.62  | C | E | 0.08 | 0.21  | 6.09  | C | E | 0.08 | 0.21 | 6.41  |
| 289 | C | E | 0.08 | 0.18 | 4.84  | C | E | 0.08 | 0.01 | 4.78  | C | E | 0.08 | 0.23 | 5.45  | C | E | 0.08 | 0.20 | 4.51  | C | E | 0.09 | 0.19 | 6.15  | C | E | 0.07 | 0.20 | 6.71  | C | E | 0.08 | 0.02  | 6.12  | C | E | 0.08 | 0.21 | 6.56  |
| 290 | C | E | 0.08 | 0.49 | 4.87  | C | E | 0.07 | 0.20 | 4.82  | C | E | 0.08 | 0.49 | 5.52  | C | E | 0.08 | 0.50 | 4.51  | C | E | 0.08 | 0.47 | 6.18  | C | E | 0.07 | 0.25 | 6.72  | C | E | 0.08 | 0.03  | 6.22  | C | E | 0.08 | 0.49 | 6.62  |
| 291 | C | E | 0.08 | 0.54 | 4.78  | C | E | 0.07 | 0.19 | 4.78  | C | E | 0.08 | 0.61 | 5.43  | C | E | 0.08 | 0.53 | 4.46  | C | E | 0.08 | 0.55 | 6.12  | C | E | 0.08 | 0.21 | 6.64  | C | E | 0.08 | -0.01 | 6.19  | C | E | 0.08 | 0.56 | 6.58  |
| 292 | C | E | 0.08 | 0.41 | 4.82  | C | E | 0.07 | 0.10 | 4.75  | C | E | 0.08 | 0.48 | 5.44  | C | E | 0.08 | 0.41 | 4.47  | C | E | 0.07 | 0.48 | 6.13  | C | E | 0.07 | 0.09 | 6.67  | C | E | 0.08 | -0.13 | 6.20  | C | E | 0.07 | 0.45 | 6.59  |
| 293 | C | E | 0.08 | 0.62 | 4.91  | C | E | 0.07 | 0.06 | 4.83  | C | E | 0.08 | 0.64 | 5.56  | C | E | 0.07 | 0.67 | 4.51  | C | E | 0.07 | 0.68 | 6.19  | C | E | 0.07 | 0.06 | 6.68  | C | E | 0.07 | -0.14 | 6.27  | C | E | 0.07 | 0.65 | 6.68  |
| 294 | C | E | 0.07 | 0.23 | 4.91  | C | E | 0.07 | 0.16 | 4.84  | C | E | 0.08 | 0.76 | 5.59  | C | E | 0.07 | 0.24 | 4.50  | C | E | 0.07 | 0.26 | 6.17  | C | E | 0.07 | 0.16 | 6.68  | C | E | 0.07 | 0.17  | 6.28  | C | E | 0.06 | 0.25 | 6.72  |
| 295 | C | E | 0.08 | 0.13 | 4.84  | C | E | 0.07 | 0.09 | 4.80  | C | E | 0.08 | 0.69 | 5.50  | C | E | 0.06 | 0.16 | 4.47  | C | E | 0.08 | 0.17 | 6.03  | C | E | 0.08 | 0.12 | 6.60  | C | E | 0.08 | 0.14  | 6.24  | C | E | 0.07 | 0.18 | 6.66  |
| 296 | C | E | 0.07 | 0.08 | 4.94  | C | E | 0.07 | 0.14 | 4.87  | C | E | 0.08 | 0.67 | 5.59  | C | E | 0.06 | 0.15 | 4.46  | C | E | 0.08 | 0.13 | 6.08  | C | E | 0.07 | 0.08 | 6.70  | C | E | 0.08 | 0.16  | 6.20  | C | E | 0.07 | 0.16 | 6.73  |
| 297 | C | E | 0.07 | 0.09 | 4.96  | C | E | 0.07 | 0.12 | 4.94  | C | E | 0.08 | 0.70 | 5.65  | C | E | 0.06 | 0.13 | 4.48  | C | E | 0.08 | 0.13 | 6.12  | C | E | 0.07 | 0.12 | 6.77  | C | E | 0.08 | 0.16  | 6.26  | C | E | 0.07 | 0.13 | 6.73  |
| 298 | C | E | 0.07 | 0.15 | 5.19  | C | E | 0.06 | 0.19 | 4.98  | C | E | 0.08 | 0.73 | 5.29  | C | E | 0.05 | 0.14 | 4.65  | C | E | 0.08 | 0.18 | 6.82  | C | E | 0.07 | 0.15 | 7.33  | C | E | 0.08 | 0.19  | 6.76  | C | E | 0.07 | 0.13 | 6.76  |
| 299 | C | E | 0.07 | 0.27 | 6.85  | C | E | 0.06 | 0.23 | 6.41  | C | E | 0.08 | 0.88 | 6.15  | C | E | 0.05 | 0.25 | 6.26  | C | E | 0.08 | 0.30 | 7.86  | C | E | 0.07 | 0.22 | 10.00 | C | E | 0.08 | 0.23  | 9.57  | C | E | 0.07 | 0.24 | 9.00  |
| 300 | C | E | 0.08 | 0.30 | 8.51  | C | E | 0.06 | 0.33 | 7.77  | C | E | 0.09 | 0.96 | 7.82  | C | E | 0.05 | 0.28 | 8.08  | C | E | 0.08 | 0.29 | 8.23  | C | E | 0.07 | 0.32 | 12.84 | C | E | 0.08 | 0.35  | 12.04 | C | E | 0.08 | 0.28 | 11.48 |
| 301 | C | E | 0.06 | 0.30 | 10.04 | C | E | 0.03 | 0.30 | 8.89  | C | E | 0.07 | 0.88 | 9.35  | C | E | 0.04 | 0.28 | 9.37  | C | E | 0.07 | 0.27 | 8.65  | C | E | 0.06 | 0.24 | 15.20 | C | E | 0.06 | 0.28  | 14.29 | C | E | 0.05 | 0.28 | 13.51 |
| 302 | C | E | 0.06 | 0.26 | 11.48 | C | E | 0.03 | 0.24 | 9.85  | C | E | 0.08 | 0.80 | 10.40 | C | E | 0.04 | 0.22 | 10.69 | C | E | 0.07 | 0.23 | 9.45  | C | E | 0.05 | 0.20 | 17.07 | C | E | 0.07 | 0.23  | 15.96 | C | E | 0.06 | 0.24 | 15.20 |
| 303 | C | E | 0.05 | 0.17 | 12.88 | C | E | 0.02 | 0.15 | 11.07 | C | E | 0.06 | 0.65 | 11.39 | C | E | 0.04 | 0.16 | 11.85 | C | E | 0.05 | 0.15 | 10.33 | C | E | 0.05 | 0.11 | 18.95 | C | E | 0.05 | 0.16  | 17.82 | C | E | 0.04 | 0.13 | 17.00 |
| 304 | C | E | 0.04 | 0.20 | 14.02 | C | E | 0.02 | 0.17 | 12.37 | C | E | 0.05 | 0.62 | 12.10 | C | E | 0.04 | 0.17 | 12.59 | C | E | 0.05 | 0.22 | 10.04 | C | E | 0.04 | 0.17 | 20.53 | C | E | 0.05 | 0.20  | 19.83 | C | E | 0.04 | 0.16 | 18.62 |
| 305 | C | E | 0.03 | 0.25 | 14.69 | C | E | 0.01 | 0.23 | 13.09 | C | E | 0.05 | 0.74 | 12.86 | C | E | 0.04 | 0.27 | 13.38 | C | E | 0.04 | 0.27 | 8.56  | C | E | 0.03 | 0.25 | 21.43 | C | E | 0.04 | 0.25  | 21.25 | C | E | 0.03 | 0.23 | 19.67 |
| 306 | C | E | 0.02 | 0.36 | 15.22 | C | E | 0.01 | 0.32 | 13.61 | C | E | 0.04 | 0.90 | 13.56 | C | E | 0.03 | 0.38 | 14.19 | C | E | 0.03 | 0.35 | 7.94  | C | E | 0.02 | 0.34 | 22.68 | C | E | 0.03 | 0.36  | 22.68 | C | E | 0.02 | 0.34 | 21.22 |
| 307 | C | E | 0.04 | 0.34 | 14.61 | C | E | 0.01 | 0.29 | 14.26 | C | E | 0.05 | 0.88 | 14.45 | C | E | 0.04 | 0.32 | 14.95 | C | E | 0.05 | 0.33 | 7.99  | C | E | 0.04 | 0.29 |       |   |   |      |       |       |   |   |      |      |       |

|     |   |   |      |       |       |   |   |      |      |       |   |   |      |      |       |   |   |      |      |       |   |   |      |       |       |   |     |      |       |       |   |   |      |      |       |   |   |      |      |       |
|-----|---|---|------|-------|-------|---|---|------|------|-------|---|---|------|------|-------|---|---|------|------|-------|---|---|------|-------|-------|---|-----|------|-------|-------|---|---|------|------|-------|---|---|------|------|-------|
| 322 | C | E | 0.07 | 0.67  | 5.59  | C | E | 0.04 | 0.29 | 14.18 | C | E | 0.08 | 0.53 | 11.84 | C | E | 0.05 | 0.26 | 11.52 | C | E | 0.08 | 0.65  | 7.53  | C | E   | 0.07 | 0.63  | 14.61 | C | E | 0.07 | 0.29 | 20.16 | C | E | 0.07 | 0.25 | 19.75 |
| 323 | C | E | 0.08 | 0.34  | 5.17  | C | E | 0.04 | 0.22 | 12.99 | C | E | 0.08 | 0.38 | 11.49 | C | E | 0.05 | 0.26 | 12.05 | C | E | 0.08 | 0.36  | 7.98  | C | E   | 0.08 | 0.31  | 14.20 | C | E | 0.08 | 0.33 | 18.55 | C | E | 0.09 | 0.29 | 19.00 |
| 324 | C | E | 0.09 | 0.63  | 5.42  | C | E | 0.05 | 0.23 | 12.18 | C | E | 0.08 | 0.51 | 10.89 | C | E | 0.07 | 0.82 | 12.20 | C | E | 0.08 | 0.50  | 8.21  | C | E   | 0.08 | 0.46  | 13.53 | C | E | 0.09 | 0.59 | 16.74 | C | E | 0.10 | 0.60 | 17.50 |
| 325 | C | E | 0.09 | 0.58  | 5.87  | C | E | 0.05 | 0.19 | 11.12 | C | E | 0.08 | 0.50 | 9.55  | C | E | 0.07 | 0.79 | 12.51 | C | E | 0.10 | 0.51  | 8.36  | C | E   | 0.08 | 0.44  | 12.97 | C | E | 0.10 | 0.55 | 14.70 | C | E | 0.10 | 0.56 | 15.27 |
| 326 | C | E | 0.09 | 0.89  | 5.65  | C | B | 0.05 | 0.12 | 9.49  | C | E | 0.08 | 0.84 | 8.14  | C | E | 0.07 | 0.77 | 12.08 | C | B | 0.09 | 1.01  | 7.90  | C | E   | 0.08 | 0.97  | 12.19 | C | E | 0.09 | 0.86 | 12.30 | C | E | 0.10 | 0.87 | 12.88 |
| 327 | C | E | 0.09 | 0.79  | 5.23  | C | E | 0.05 | 0.22 | 8.10  | C | E | 0.08 | 0.67 | 7.23  | C | E | 0.07 | 1.02 | 11.42 | C | E | 0.09 | 0.71  | 8.14  | C | E   | 0.08 | 0.69  | 12.09 | C | E | 0.09 | 0.80 | 10.79 | C | E | 0.10 | 0.79 | 11.45 |
| 328 | C | E | 0.08 | 0.81  | 5.38  | C | E | 0.05 | 0.24 | 6.56  | C | E | 0.08 | 0.74 | 6.42  | C | E | 0.07 | 0.90 | 10.25 | C | E | 0.09 | 0.79  | 7.29  | C | E   | 0.08 | 0.85  | 11.41 | C | E | 0.09 | 0.79 | 8.89  | C | E | 0.10 | 0.80 | 9.76  |
| 329 | C | E | 0.09 | 0.76  | 5.19  | C | E | 0.05 | 0.24 | 5.68  | C | E | 0.09 | 0.65 | 6.32  | C | E | 0.06 | 0.96 | 8.86  | C | E | 0.09 | 0.71  | 6.73  | C | E   | 0.08 | 0.68  | 10.20 | C | E | 0.10 | 0.82 | 7.66  | C | E | 0.10 | 0.85 | 9.08  |
| 330 | C | E | 0.10 | 1.02  | 4.95  | C | E | 0.07 | 0.32 | 4.88  | C | E | 0.12 | 0.60 | 5.48  | C | E | 0.07 | 1.03 | 6.92  | C | E | 0.12 | 1.17  | 6.24  | C | E   | 0.08 | 0.31  | 8.98  | C | E | 0.10 | 1.06 | 6.53  | C | E | 0.11 | 1.03 | 8.11  |
| 331 | C | E | 0.11 | 0.82  | 4.90  | C | E | 0.07 | 0.33 | 4.79  | C | E | 0.12 | 0.53 | 5.06  | C | E | 0.08 | 0.80 | 5.11  | C | E | 0.12 | 1.25  | 6.13  | C | E   | 0.09 | 0.26  | 6.86  | C | E | 0.10 | 0.80 | 6.10  | C | E | 0.11 | 0.83 | 6.21  |
| 332 | C | E | 0.11 | 0.58  | 4.58  | C | E | 0.08 | 0.32 | 4.37  | C | E | 0.12 | 0.69 | 5.07  | C | E | 0.08 | 0.44 | 4.49  | C | E | 0.12 | 1.22  | 6.08  | C | E   | 0.09 | 0.41  | 6.47  | C | E | 0.11 | 0.47 | 6.09  | C | E | 0.11 | 0.61 | 6.20  |
| 333 | C | E | 0.12 | 0.48  | 4.62  | C | E | 0.08 | 0.25 | 4.46  | C | E | 0.12 | 0.60 | 5.13  | C | E | 0.08 | 0.48 | 4.47  | C | E | 0.12 | 0.73  | 6.15  | C | E   | 0.09 | 0.28  | 6.45  | C | E | 0.11 | 0.35 | 6.10  | C | E | 0.12 | 0.50 | 6.24  |
| 334 | C | E | 0.10 | 0.87  | 4.77  | C | E | 0.08 | 0.21 | 4.52  | C | E | 0.12 | 0.51 | 5.24  | C | E | 0.09 | 0.94 | 4.51  | C | E | 0.12 | 0.39  | 6.23  | C | E   | 0.09 | 0.24  | 6.53  | C | E | 0.11 | 0.52 | 6.13  | C | E | 0.12 | 0.85 | 6.30  |
| 335 | C | E | 0.11 | 0.91  | 4.78  | C | E | 0.08 | 0.48 | 4.48  | C | E | 0.12 | 0.28 | 5.19  | C | E | 0.09 | 1.08 | 4.56  | C | E | 0.13 | 0.60  | 6.21  | C | E   | 0.09 | 0.22  | 6.51  | C | E | 0.12 | 0.66 | 6.12  | C | E | 0.12 | 0.84 | 6.28  |
| 336 | C | E | 0.11 | 0.57  | 4.74  | C | B | 0.10 | 0.45 | 4.47  | C | B | 0.12 | 0.43 | 5.17  | C | E | 0.11 | 0.75 | 4.52  | C | E | 0.13 | 0.88  | 6.19  | C | B   | 0.09 | -0.03 | 6.46  | C | B | 0.12 | 0.41 | 6.12  | C | B | 0.12 | 0.40 | 6.37  |
| 337 | C | E | 0.11 | 0.42  | 4.80  | C | E | 0.10 | 0.28 | 4.55  | C | E | 0.14 | 0.43 | 5.27  | C | E | 0.12 | 0.41 | 4.51  | C | E | 0.12 | 0.02  | 6.25  | C | E   | 0.09 | -0.12 | 6.50  | C | E | 0.12 | 0.21 | 6.16  | C | E | 0.12 | 0.26 | 6.43  |
| 338 | C | E | 0.13 | 0.61  | 4.86  | C | E | 0.10 | 0.31 | 4.56  | C | B | 0.16 | 0.48 | 5.29  | C | E | 0.12 | 0.25 | 4.58  | C | E | 0.15 | 0.16  | 6.27  | C | B   | 0.11 | -0.09 | 6.53  | C | B | 0.13 | 0.22 | 6.16  | C | B | 0.14 | 0.42 | 6.44  |
| 339 | C | E | 0.13 | 0.65  | 4.84  | C | E | 0.09 | 0.53 | 4.54  | C | E | 0.15 | 0.43 | 5.24  | C | E | 0.12 | 0.54 | 4.66  | C | E | 0.15 | 0.30  | 6.23  | C | E   | 0.12 | -0.06 | 6.48  | C | E | 0.14 | 0.49 | 6.15  | C | E | 0.13 | 0.51 | 6.43  |
| 340 | C | E | 0.13 | 0.60  | 4.84  | C | E | 0.09 | 0.55 | 4.58  | C | E | 0.16 | 0.45 | 5.28  | C | E | 0.13 | 0.68 | 4.63  | C | E | 0.15 | 0.17  | 6.24  | C | E   | 0.13 | 0.07  | 6.43  | C | E | 0.15 | 0.54 | 6.15  | C | E | 0.14 | 0.56 | 6.47  |
| 341 | C | E | 0.15 | 0.78  | 4.91  | C | B | 0.09 | 0.67 | 4.65  | C | B | 0.17 | 0.54 | 5.38  | C | E | 0.14 | 0.49 | 4.64  | C | B | 0.16 | 0.26  | 6.29  | C | B   | 0.14 | 0.54  | 6.49  | C | B | 0.15 | 0.64 | 6.18  | C | B | 0.15 | 0.67 | 6.52  |
| 342 | C | B | 0.14 | 0.66  | 4.96  | C | B | 0.09 | 0.60 | 4.64  | C | B | 0.16 | 0.54 | 5.39  | C | B | 0.14 | 0.48 | 4.71  | C | B | 0.15 | 0.35  | 6.32  | C | B   | 0.14 | 0.54  | 6.50  | C | B | 0.14 | 0.81 | 6.20  | C | B | 0.14 | 0.61 | 6.53  |
| 343 | C | E | 0.15 | 0.67  | 4.94  | C | E | 0.09 | 0.81 | 4.64  | C | E | 0.16 | 0.48 | 5.37  | C | E | 0.14 | 0.60 | 4.72  | C | E | 0.15 | 0.27  | 6.29  | C | E   | 0.13 | 0.78  | 6.47  | C | E | 0.13 | 1.08 | 6.22  | C | E | 0.14 | 0.64 | 6.54  |
| 344 | C | E | 0.14 | 0.87  | 4.98  | C | E | 0.10 | 1.13 | 4.70  | C | E | 0.15 | 0.68 | 5.47  | C | E | 0.12 | 0.73 | 4.72  | C | E | 0.14 | 0.58  | 6.35  | C | E   | 0.13 | 1.07  | 6.50  | C | E | 0.12 | 1.31 | 6.25  | C | E | 0.12 | 0.89 | 6.62  |
| 345 | C | E | 0.14 | 0.74  | 5.08  | C | E | 0.09 | 0.90 | 4.74  | C | E | 0.15 | 0.56 | 5.56  | C | E | 0.12 | 0.59 | 4.78  | C | E | 0.14 | 0.39  | 6.42  | C | E   | 0.13 | 0.87  | 6.50  | C | E | 0.12 | 1.17 | 6.29  | C | E | 0.13 | 0.77 | 6.66  |
| 346 | C | E | 0.13 | 0.59  | 5.11  | C | E | 0.09 | 0.85 | 4.68  | C | E | 0.14 | 0.52 | 5.55  | C | E | 0.11 | 0.51 | 4.81  | C | E | 0.13 | 0.32  | 6.35  | C | E   | 0.12 | 0.85  | 6.49  | C | E | 0.12 | 0.95 | 6.31  | C | E | 0.13 | 0.65 | 6.59  |
| 347 | C | E | 0.12 | 0.76  | 5.07  | C | E | 0.09 | 0.91 | 4.86  | C | E | 0.13 | 0.68 | 5.60  | C | E | 0.10 | 0.54 | 4.92  | C | E | 0.12 | 0.30  | 6.73  | C | E   | 0.12 | 0.93  | 6.73  | C | E | 0.12 | 0.93 | 6.79  | C | E | 0.12 | 0.82 | 7.10  |
| 348 | C | E | 0.11 | 0.65  | 6.65  | C | E | 0.07 | 0.66 | 5.14  | C | E | 0.11 | 0.59 | 5.89  | C | E | 0.09 | 0.49 | 5.06  | C | E | 0.10 | 0.22  | 8.50  | C | E   | 0.10 | 0.63  | 7.40  | C | E | 0.11 | 0.78 | 8.20  | C | E | 0.12 | 0.67 | 7.80  |
| 349 | C | E | 0.14 | 0.39  | 7.35  | C | E | 0.07 | 0.33 | 5.03  | C | E | 0.11 | 0.36 | 5.90  | C | E | 0.11 | 0.26 | 4.86  | C | E | 0.12 | 0.00  | 8.09  | C | E   | 0.12 | 0.32  | 7.65  | C | E | 0.11 | 0.57 | 9.85  | C | E | 0.12 | 0.42 | 7.71  |
| 350 | C | B | 0.12 | 0.26  | 8.42  | C | B | 0.07 | 0.27 | 5.13  | C | B | 0.10 | 0.28 | 6.00  | C | B | 0.10 | 0.16 | 5.00  | C | B | 0.10 | -0.26 | 9.75  | C | B   | 0.12 | 0.24  | 7.98  | C | B | 0.10 | 0.40 | 10.39 | C | B | 0.12 | 0.26 | 7.87  |
| 351 | C | B | 0.12 | 0.44  | 9.31  | C | B | 0.07 | 0.30 | 5.46  | C | B | 0.10 | 0.24 | 5.97  | C | B | 0.12 | 0.25 | 5.27  | C | E | 0.10 | 0.15  | 11.70 | C | B   | 0.12 | 0.28  | 7.88  | C | B | 0.10 | 0.68 | 9.79  | C | B | 0.12 | 0.39 | 8.60  |
| 352 | C | E | 0.13 | 0.58  | 9.87  | C | E | 0.06 | 0.58 | 6.13  | C | E | 0.12 | 0.35 | 7.00  | C | E | 0.12 | 0.43 | 6.16  | C | E | 0.11 | 0.32  | 12.20 | C | E   | 0.12 | 0.56  | 9.82  | C | E | 0.10 | 0.80 | 11.11 | C | E | 0.11 | 0.58 | 9.12  |
| 353 | C | E | 0.13 | 0.66  | 10.21 | C | E | 0.06 | 0.60 | 7.64  | C | E | 0.10 | 0.52 | 7.85  | C | E | 0.10 | 0.47 | 5.89  | C | E | 0.10 | 0.18  | 14.28 | C | E   | 0.12 | 0.53  | 11.09 | C | E | 0.09 | 0.72 | 11.55 | C | E | 0.10 | 0.71 | 9.85  |
| 354 | C | E | 0.12 | 0.33  | 10.82 | C | E | 0.05 | 0.61 | 9.00  | C | E | 0.10 | 0.33 | 8.42  | C | B | 0.09 | 0.21 | 7.26  | C | E | 0.10 | 0.09  | 16.75 | C | E   | 0.11 | 0.54  | 13.40 | C | E | 0.10 | 0.56 | 12.56 | C | E | 0.12 | 0.31 | 11.85 |
| 355 | C | E | 0.12 | 0.48  | 12.08 | C | E | 0.05 | 0.74 | 10.77 | C | E | 0.10 | 0.39 | 9.45  | C | E | 0.09 | 0.47 | 7.33  | C | E | 0.10 | 0.45  | 19.29 | C | E   | 0.09 | 0.75  | 15.38 | C | E | 0.08 | 0.84 | 14.01 | C | E | 0.12 | 0.48 | 13.31 |
| 356 | C | E | 0.14 | 0.64  | 12.68 | C | E | 0.07 | 0.92 | 11.24 | C | E | 0.10 | 0.53 | 10.44 | C | E | 0.10 | 0.68 | 7.81  | C | E | 0.12 | 0.56  | 20.43 | C | E   | 0.09 | 0.88  | 17.26 | C | E | 0.08 | 1.01 | 14.66 | C | E | 0.12 | 0.66 | 13.99 |
| 357 | C | E | 0.15 | 0.50  | 12.50 | C | E | 0.07 | 0.90 | 10.84 | C | E | 0.12 | 0.43 | 10.50 | C | E | 0.12 | 0.54 | 7.42  | C | E | 0.12 | 0.68  | 19.68 | C | E   | 0.11 | 0.72  | 18.19 | C | E | 0.09 | 0.89 | 15.05 | C | E | 0.14 | 0.55 | 15.11 |
| 358 | C | B | 0.14 | -0.05 | 12.33 | C | B | 0.06 | 0.62 | 11.01 | C | B | 0.10 | 0.08 | 10.90 | C | E | 0.12 | 0.30 | 7.15  | C | B | 0.11 | 0.68  | 19.84 | C | E   | 0.09 | 0.40  | 20.39 | C | B | 0.08 | 0.35 | 15.46 | C | E | 0.13 | 0.18 | 16.77 |
| 359 | C | B | 0.13 | 0.07  | 12.52 | C | B | 0.07 | 0.48 | 10.88 | C | B | 0.10 | 0.13 | 11.71 | C | B | 0.12 | 0.42 | 7.09  | C | B | 0.11 | 0.54  | 20.11 | C | B   | 0.10 | 0.30  | 21.46 | C | B | 0.09 | 0.54 | 17.16 | C | B | 0.13 | 0.31 | 18.49 |
| 360 | C | E | 0.15 | 0.54  | 13.29 | C | E | 0.09 | 0.64 | 11.61 | C | E | 0.12 | 0.46 | 12.39 | C | E | 0.12 | 0.56 | 7.21  | C | E | 0.12 | 0.50  | 21.09 | C | E   | 0.12 | 0.55  | 22.91 | C | E | 0.10 | 0.77 | 17.58 | C | E | 0.14 | 0.54 | 20.16 |
| 361 | C | E | 0.15 | 0.35  | 13.92 | C | B | 0.10 | 0.51 | 12.72 | C | E | 0.12 | 0.37 | 13.04 | C | E | 0.13 | 0.43 | 7.35  | C | E | 0.13 | 0.47  | 21.83 | C | E</ |      |       |       |   |   |      |      |       |   |   |      |      |       |

|     |   |   |      |       |       |   |   |      |       |       |   |   |      |       |       |   |   |      |       |      |   |   |      |       |       |   |   |      |       |       |   |   |      |       |       |   |   |      |       |       |
|-----|---|---|------|-------|-------|---|---|------|-------|-------|---|---|------|-------|-------|---|---|------|-------|------|---|---|------|-------|-------|---|---|------|-------|-------|---|---|------|-------|-------|---|---|------|-------|-------|
| 376 | C | B | 0.22 | -0.01 | 14.97 | C | B | 0.18 | 0.21  | 20.90 | C | E | 0.19 | 0.19  | 16.40 | C | B | 0.21 | 0.13  | 8.10 | C | B | 0.18 | -0.00 | 22.66 | C | E | 0.18 | 0.01  | 19.61 | C | E | 0.18 | 0.11  | 19.90 | C | E | 0.20 | 0.18  | 20.53 |
| 377 | C | E | 0.23 | 0.14  | 14.58 | C | E | 0.18 | 0.23  | 20.42 | C | E | 0.21 | 0.31  | 15.61 | C | E | 0.20 | 0.17  | 8.47 | C | E | 0.19 | 0.15  | 22.80 | C | E | 0.18 | 0.07  | 20.41 | C | E | 0.18 | 0.24  | 19.25 | C | E | 0.22 | 0.23  | 20.93 |
| 378 | C | E | 0.22 | 0.02  | 13.84 | C | E | 0.19 | 0.42  | 19.38 | C | E | 0.20 | 0.21  | 14.68 | C | E | 0.19 | 0.12  | 8.31 | C | E | 0.19 | 0.09  | 21.66 | C | E | 0.19 | 0.00  | 20.09 | C | E | 0.18 | 0.06  | 18.69 | C | E | 0.21 | 0.09  | 19.81 |
| 379 | C | E | 0.24 | 0.02  | 12.56 | C | E | 0.23 | 0.47  | 18.44 | C | E | 0.21 | 0.22  | 14.81 | C | E | 0.22 | 0.24  | 8.12 | C | E | 0.20 | 0.11  | 20.17 | C | E | 0.22 | 0.14  | 20.15 | C | E | 0.19 | 0.11  | 17.79 | C | E | 0.24 | 0.21  | 18.84 |
| 380 | C | E | 0.25 | 0.10  | 11.94 | C | E | 0.23 | 0.32  | 17.21 | C | E | 0.21 | 0.31  | 14.69 | C | E | 0.23 | 0.15  | 8.47 | C | E | 0.22 | 0.20  | 17.98 | C | E | 0.22 | 0.15  | 19.79 | C | E | 0.20 | 0.09  | 17.33 | C | E | 0.25 | 0.20  | 17.74 |
| 381 | C | E | 0.25 | 0.23  | 11.49 | C | E | 0.23 | 0.51  | 15.97 | C | E | 0.22 | 0.48  | 13.82 | C | E | 0.27 | 0.21  | 7.91 | C | E | 0.25 | 0.33  | 16.51 | C | E | 0.23 | 0.39  | 19.57 | C | E | 0.22 | 0.29  | 16.59 | C | E | 0.28 | 0.31  | 16.36 |
| 382 | C | E | 0.25 | 0.27  | 10.62 | C | E | 0.23 | 0.50  | 15.08 | C | E | 0.22 | 0.46  | 12.65 | C | E | 0.26 | 0.17  | 7.96 | C | E | 0.25 | 0.35  | 15.42 | C | E | 0.24 | 0.43  | 18.95 | C | E | 0.22 | 0.37  | 15.76 | C | E | 0.28 | 0.36  | 15.23 |
| 383 | C | E | 0.25 | 0.09  | 9.65  | C | E | 0.21 | 0.29  | 14.46 | C | B | 0.21 | 0.19  | 12.14 | C | B | 0.25 | -0.04 | 7.57 | C | E | 0.23 | 0.15  | 14.16 | C | E | 0.23 | 0.09  | 17.67 | C | B | 0.19 | 0.06  | 15.28 | C | E | 0.25 | 0.09  | 13.80 |
| 384 | C | E | 0.25 | 0.04  | 9.44  | C | E | 0.24 | 0.22  | 13.36 | C | B | 0.21 | 0.13  | 11.89 | C | E | 0.27 | 0.03  | 7.29 | C | E | 0.23 | 0.10  | 12.12 | C | E | 0.23 | -0.03 | 16.96 | C | E | 0.19 | -0.01 | 14.10 | C | E | 0.25 | 0.00  | 12.85 |
| 385 | C | E | 0.25 | 0.05  | 9.11  | C | E | 0.24 | 0.26  | 12.65 | C | E | 0.22 | 0.14  | 10.70 | C | E | 0.28 | 0.11  | 7.94 | C | E | 0.24 | 0.11  | 10.47 | C | E | 0.25 | 0.04  | 15.87 | C | E | 0.21 | 0.13  | 12.81 | C | E | 0.27 | 0.10  | 11.81 |
| 386 | C | E | 0.25 | 0.04  | 8.23  | C | E | 0.23 | 0.18  | 11.57 | C | E | 0.22 | 0.07  | 9.79  | C | E | 0.24 | -0.15 | 7.00 | C | E | 0.23 | 0.13  | 9.76  | C | E | 0.25 | -0.06 | 14.38 | C | E | 0.20 | 0.01  | 11.98 | C | E | 0.25 | 0.02  | 10.72 |
| 387 | C | E | 0.25 | 0.11  | 7.85  | C | E | 0.24 | 0.28  | 11.26 | C | E | 0.22 | 0.10  | 9.36  | C | E | 0.23 | -0.03 | 6.83 | C | E | 0.22 | 0.15  | 9.24  | C | E | 0.23 | 0.10  | 12.97 | C | E | 0.19 | 0.20  | 10.68 | C | E | 0.25 | 0.11  | 9.79  |
| 388 | C | E | 0.25 | 0.03  | 6.58  | C | B | 0.23 | 0.19  | 9.70  | C | B | 0.22 | 0.01  | 7.68  | C | B | 0.24 | -0.11 | 5.95 | C | E | 0.23 | 0.07  | 8.46  | C | B | 0.25 | 0.04  | 10.89 | C | E | 0.22 | 0.15  | 8.42  | C | E | 0.25 | 0.02  | 9.22  |
| 389 | C | E | 0.25 | 0.23  | 5.55  | C | E | 0.27 | 0.27  | 8.38  | C | E | 0.22 | 0.20  | 7.05  | C | E | 0.27 | 0.04  | 5.50 | C | E | 0.23 | 0.23  | 7.97  | C | E | 0.26 | 0.19  | 8.08  | C | E | 0.23 | 0.29  | 6.64  | C | E | 0.26 | 0.12  | 8.75  |
| 390 | C | E | 0.25 | 0.40  | 5.03  | C | E | 0.28 | 0.50  | 6.57  | C | E | 0.23 | 0.43  | 5.96  | C | E | 0.28 | 0.31  | 4.77 | C | E | 0.24 | 0.44  | 7.98  | C | E | 0.27 | 0.37  | 7.19  | C | E | 0.24 | 0.42  | 6.61  | C | E | 0.26 | 0.29  | 8.33  |
| 391 | C | E | 0.27 | 0.47  | 5.22  | C | E | 0.28 | 0.60  | 6.10  | C | E | 0.24 | 0.49  | 6.54  | C | E | 0.28 | 0.35  | 4.89 | C | E | 0.25 | 0.52  | 9.26  | C | E | 0.27 | 0.41  | 8.41  | C | E | 0.25 | 0.42  | 8.32  | C | E | 0.26 | 0.41  | 8.90  |
| 392 | C | B | 0.28 | 0.28  | 6.92  | C | B | 0.28 | 0.41  | 5.99  | C | B | 0.26 | 0.29  | 8.15  | C | B | 0.30 | 0.20  | 5.17 | C | B | 0.27 | 0.28  | 12.18 | C | B | 0.29 | 0.18  | 10.84 | C | B | 0.27 | 0.19  | 10.87 | C | B | 0.28 | 0.21  | 11.87 |
| 393 | C | E | 0.28 | 0.44  | 7.90  | C | E | 0.28 | 0.43  | 5.80  | C | E | 0.26 | 0.35  | 8.61  | C | E | 0.30 | 0.41  | 5.13 | C | E | 0.26 | 0.29  | 12.93 | C | E | 0.29 | 0.31  | 11.39 | C | E | 0.26 | 0.39  | 11.61 | C | E | 0.29 | 0.34  | 13.03 |
| 394 | C | E | 0.28 | 0.46  | 7.94  | C | E | 0.28 | 0.53  | 5.50  | C | E | 0.25 | 0.45  | 8.42  | C | E | 0.28 | 0.54  | 4.79 | C | E | 0.25 | 0.38  | 12.95 | C | E | 0.28 | 0.38  | 11.90 | C | E | 0.25 | 0.45  | 11.84 | C | E | 0.28 | 0.42  | 12.79 |
| 395 | C | E | 0.28 | 0.44  | 7.73  | C | E | 0.28 | 0.45  | 5.49  | C | E | 0.27 | 0.48  | 8.24  | C | E | 0.27 | 0.48  | 4.80 | C | E | 0.27 | 0.43  | 12.53 | C | E | 0.29 | 0.29  | 12.01 | C | E | 0.28 | 0.30  | 11.52 | C | E | 0.31 | 0.36  | 12.50 |
| 396 | C | E | 0.26 | 0.31  | 6.38  | C | E | 0.28 | 0.40  | 4.91  | C | E | 0.27 | 0.32  | 7.32  | C | E | 0.27 | 0.39  | 4.95 | C | E | 0.25 | 0.29  | 10.54 | C | E | 0.30 | 0.22  | 9.78  | C | E | 0.26 | 0.15  | 9.47  | C | E | 0.31 | 0.20  | 10.76 |
| 397 | C | E | 0.26 | 0.20  | 4.91  | C | E | 0.27 | 0.43  | 4.62  | C | B | 0.27 | 0.12  | 5.59  | C | E | 0.27 | 0.28  | 4.85 | C | E | 0.25 | 0.19  | 7.65  | C | E | 0.29 | 0.19  | 7.58  | C | E | 0.26 | 0.06  | 6.99  | C | E | 0.30 | 0.20  | 7.63  |
| 398 | C | B | 0.24 | 0.06  | 5.00  | C | E | 0.25 | 0.30  | 4.67  | C | E | 0.28 | 0.09  | 5.44  | C | E | 0.27 | 0.23  | 5.02 | C | B | 0.25 | 0.09  | 6.98  | C | E | 0.26 | 0.09  | 6.70  | C | E | 0.25 | -0.02 | 6.76  | C | E | 0.28 | 0.16  | 7.02  |
| 399 | C | B | 0.27 | 0.12  | 4.98  | C | B | 0.27 | 0.22  | 4.41  | C | B | 0.27 | 0.10  | 5.13  | C | B | 0.28 | 0.16  | 4.84 | C | B | 0.25 | 0.03  | 6.87  | C | B | 0.30 | 0.10  | 6.53  | C | B | 0.27 | 0.03  | 6.16  | C | B | 0.28 | 0.21  | 6.44  |
| 400 | C | E | 0.28 | 0.35  | 4.93  | C | E | 0.28 | 0.27  | 4.47  | C | E | 0.27 | 0.26  | 5.18  | C | E | 0.29 | 0.38  | 4.87 | C | E | 0.27 | 0.24  | 6.62  | C | E | 0.30 | 0.21  | 6.40  | C | E | 0.27 | 0.23  | 5.99  | C | E | 0.29 | 0.37  | 6.15  |
| 401 | C | E | 0.27 | 0.40  | 4.99  | C | E | 0.28 | 0.30  | 4.42  | C | E | 0.26 | 0.32  | 5.16  | C | E | 0.28 | 0.37  | 4.89 | C | E | 0.27 | 0.32  | 6.69  | C | E | 0.31 | 0.23  | 6.47  | C | E | 0.28 | 0.24  | 6.34  | C | E | 0.29 | 0.39  | 6.29  |
| 402 | C | E | 0.28 | 0.52  | 4.87  | C | E | 0.28 | 0.71  | 4.27  | C | E | 0.28 | 0.49  | 5.05  | C | E | 0.30 | 0.64  | 4.76 | C | E | 0.27 | 0.50  | 6.40  | C | E | 0.30 | 0.41  | 6.48  | C | E | 0.28 | 0.38  | 6.14  | C | E | 0.29 | 0.57  | 6.11  |
| 403 | C | E | 0.28 | 0.37  | 4.80  | C | E | 0.28 | 0.50  | 4.18  | C | E | 0.27 | 0.42  | 5.03  | C | E | 0.29 | 0.45  | 4.66 | C | E | 0.28 | 0.45  | 6.08  | C | E | 0.28 | 0.24  | 6.33  | C | E | 0.29 | 0.22  | 5.90  | C | E | 0.28 | 0.46  | 6.10  |
| 404 | C | B | 0.30 | 0.24  | 4.83  | C | B | 0.27 | 0.18  | 4.18  | C | B | 0.29 | 0.28  | 4.98  | C | B | 0.29 | 0.12  | 4.74 | C | B | 0.28 | 0.15  | 6.11  | C | B | 0.27 | -0.04 | 6.37  | C | B | 0.28 | -0.02 | 5.93  | C | B | 0.28 | 0.25  | 6.10  |
| 405 | C | E | 0.31 | 0.36  | 4.77  | C | E | 0.28 | 0.15  | 4.13  | C | E | 0.29 | 0.37  | 4.90  | C | E | 0.31 | 0.26  | 4.70 | C | E | 0.28 | 0.28  | 6.08  | C | E | 0.27 | 0.01  | 6.38  | C | E | 0.28 | 0.05  | 5.89  | C | E | 0.28 | 0.29  | 6.04  |
| 406 | C | E | 0.29 | 0.32  | 4.69  | C | E | 0.28 | 0.19  | 4.15  | C | E | 0.30 | 0.30  | 4.84  | C | E | 0.28 | 0.13  | 4.68 | C | E | 0.25 | 0.24  | 6.05  | C | E | 0.28 | 0.07  | 6.21  | C | E | 0.28 | 0.03  | 5.86  | C | E | 0.28 | 0.25  | 6.05  |
| 407 | C | E | 0.29 | 0.05  | 4.64  | C | E | 0.27 | -0.02 | 4.07  | C | E | 0.28 | 0.04  | 4.73  | C | E | 0.28 | -0.12 | 4.63 | C | E | 0.26 | 0.11  | 5.95  | C | E | 0.28 | -0.17 | 6.15  | C | E | 0.27 | -0.21 | 5.81  | C | E | 0.28 | 0.04  | 5.90  |
| 408 | C | B | 0.32 | -0.09 | 4.66  | C | B | 0.28 | -0.31 | 4.07  | C | B | 0.30 | -0.11 | 4.70  | C | E | 0.33 | -0.30 | 4.67 | C | B | 0.29 | -0.06 | 5.95  | C | E | 0.29 | -0.30 | 6.14  | C | E | 0.28 | -0.37 | 5.83  | C | E | 0.32 | -0.09 | 5.88  |
| 409 | C | B | 0.31 | 0.07  | 4.61  | C | B | 0.28 | -0.26 | 4.04  | C | B | 0.28 | 0.07  | 4.62  | C | B | 0.33 | -0.15 | 4.64 | C | B | 0.28 | 0.11  | 5.93  | C | B | 0.29 | -0.18 | 6.14  | C | B | 0.27 | -0.25 | 5.80  | C | B | 0.31 | 0.03  | 5.83  |
| 410 | C | E | 0.27 | 0.37  | 4.68  | C | E | 0.27 | 0.04  | 4.07  | C | E | 0.27 | 0.36  | 4.63  | C | E | 0.30 | 0.03  | 4.69 | C | E | 0.27 | 0.31  | 5.98  | C | E | 0.28 | 0.11  | 6.22  | C | E | 0.26 | 0.07  | 5.81  | C | E | 0.29 | 0.34  | 5.85  |
| 411 | C | E | 0.25 | 0.09  | 4.76  | C | B | 0.25 | -0.08 | 4.11  | C | E | 0.26 | 0.11  | 4.65  | C | E | 0.29 | -0.10 | 4.78 | C | E | 0.25 | 0.24  | 6.05  | C | E | 0.26 | 0.01  | 6.29  | C | E | 0.25 | -0.14 | 5.85  | C | E | 0.28 | 0.18  | 5.90  |
| 412 | C | B | 0.26 | -0.07 | 4.81  | C | B | 0.27 | -0.23 | 4.07  | C | B | 0.25 | -0.11 | 4.74  | C | B | 0.30 | -0.32 | 4.81 | C | B | 0.26 | 0.01  | 6.06  | C | B | 0.27 | -0.17 | 6.29  | C | B | 0.25 | -0.33 | 5.87  | C | B | 0.28 | -0.07 | 5.94  |
| 413 | C | E | 0.29 | 0.03  | 4.87  | C | E | 0.28 | -0.00 | 4.11  | C | E | 0.27 | 0.06  | 4.82  | C | E | 0.31 | -0.12 | 4.84 | C | E | 0.28 | 0.11  | 6.10  | C | E | 0.29 | 0.01  | 6.31  | C | E | 0.27 | -0.05 | 5.86  | C | E | 0.30 | 0.12  | 5.96  |
| 414 | C | E | 0.30 | 0.03  | 4.92  | C | B | 0.28 | -0.07 | 4.14  | C | E | 0.28 | 0.04  | 4.91  | C | E | 0.31 | -0.12 | 4.84 | C | E | 0.28 | 0.14  | 6.12  | C | E | 0.28 | 0.08  | 6.32  | C | E | 0.26 | -0.03 | 5.90  | C | E | 0.31 | 0.13  | 6.00  |
| 415 | C | B | 0.29 | -0.03 | 5.04  | C | B | 0.26 | -0.12 | 4.27  | C | B | 0.28 | -0.04 | 5.01  | C | B | 0.30 | -0.19 | 4.96 | C | B | 0.28 | 0.09  | 6.24  | C | B | 0.27 | -0.00 | 6.43  | C | B | 0.   |       |       |   |   |      |       |       |

|     |   |   |      |       |      |   |   |      |       |      |   |   |      |       |      |   |   |      |       |      |   |   |      |       |      |   |   |      |       |      |   |   |      |       |       |   |   |      |       |      |
|-----|---|---|------|-------|------|---|---|------|-------|------|---|---|------|-------|------|---|---|------|-------|------|---|---|------|-------|------|---|---|------|-------|------|---|---|------|-------|-------|---|---|------|-------|------|
| 430 | C | E | 0.28 | -0.14 | 5.41 | C | E | 0.24 | -0.14 | 4.57 | C | E | 0.28 | -0.03 | 5.57 | C | E | 0.28 | -0.12 | 5.15 | C | E | 0.25 | 0.01  | 6.44 | C | E | 0.25 | -0.10 | 6.49 | C | E | 0.21 | -0.14 | 6.29  | C | E | 0.28 | 0.01  | 6.45 |
| 431 | C | B | 0.28 | -0.41 | 5.45 | C | B | 0.24 | -0.37 | 4.57 | C | B | 0.28 | -0.28 | 5.56 | C | B | 0.30 | -0.35 | 5.20 | C | B | 0.25 | -0.25 | 6.47 | C | B | 0.25 | -0.39 | 6.51 | C | B | 0.21 | -0.42 | 6.30  | C | B | 0.28 | -0.26 | 6.46 |
| 432 | C | E | 0.29 | -0.35 | 5.36 | C | E | 0.23 | -0.36 | 4.54 | C | B | 0.29 | -0.29 | 5.47 | C | E | 0.29 | -0.35 | 5.16 | C | E | 0.24 | -0.28 | 6.33 | C | E | 0.25 | -0.35 | 6.45 | C | B | 0.20 | -0.40 | 6.28  | C | E | 0.28 | -0.19 | 6.41 |
| 433 | C | E | 0.29 | -0.31 | 5.43 | C | E | 0.23 | -0.33 | 4.60 | C | E | 0.30 | -0.22 | 5.56 | C | E | 0.30 | -0.33 | 5.19 | C | E | 0.26 | -0.27 | 6.33 | C | E | 0.25 | -0.29 | 6.46 | C | E | 0.21 | -0.30 | 6.32  | C | E | 0.29 | -0.18 | 6.47 |
| 434 | C | B | 0.28 | -0.44 | 5.53 | C | E | 0.23 | -0.39 | 4.65 | C | B | 0.29 | -0.25 | 5.66 | C | B | 0.28 | -0.48 | 5.23 | C | B | 0.26 | -0.27 | 6.41 | C | B | 0.25 | -0.42 | 6.54 | C | E | 0.22 | -0.22 | 6.36  | C | B | 0.28 | -0.33 | 6.55 |
| 435 | C | B | 0.27 | -0.28 | 5.49 | C | E | 0.20 | -0.38 | 4.65 | C | B | 0.28 | -0.24 | 5.55 | C | B | 0.27 | -0.40 | 5.27 | C | E | 0.25 | -0.21 | 6.43 | C | B | 0.23 | -0.41 | 6.50 | C | E | 0.21 | -0.23 | 6.29  | C | E | 0.27 | -0.29 | 6.54 |
| 436 | C | B | 0.27 | -0.11 | 5.43 | C | B | 0.19 | -0.26 | 4.64 | C | B | 0.26 | -0.02 | 5.52 | C | B | 0.25 | -0.24 | 5.24 | C | E | 0.23 | -0.11 | 6.37 | C | B | 0.22 | -0.25 | 6.44 | C | E | 0.18 | -0.05 | 6.31  | C | B | 0.24 | -0.15 | 6.54 |
| 437 | C | B | 0.27 | 0.01  | 5.55 | C | B | 0.19 | -0.07 | 4.72 | C | B | 0.26 | 0.20  | 5.65 | C | B | 0.27 | -0.12 | 5.26 | C | B | 0.22 | -0.07 | 6.46 | C | B | 0.22 | -0.13 | 6.50 | C | E | 0.19 | 0.05  | 6.34  | C | B | 0.25 | -0.01 | 6.62 |
| 438 | C | B | 0.29 | 0.06  | 5.58 | C | B | 0.23 | -0.20 | 4.68 | C | B | 0.28 | 0.25  | 5.66 | C | B | 0.28 | 0.05  | 5.31 | C | B | 0.24 | 0.14  | 6.50 | C | E | 0.25 | -0.08 | 6.50 | C | E | 0.19 | -0.02 | 6.36  | C | B | 0.25 | 0.04  | 6.64 |
| 439 | C | E | 0.28 | 0.26  | 5.62 | C | E | 0.22 | -0.07 | 4.71 | C | E | 0.28 | 0.35  | 5.65 | C | E | 0.28 | 0.18  | 5.38 | C | E | 0.24 | 0.19  | 6.54 | C | E | 0.24 | 0.04  | 6.56 | C | E | 0.18 | 0.17  | 6.42  | C | E | 0.24 | 0.21  | 6.69 |
| 440 | C | E | 0.29 | 0.41  | 5.54 | C | E | 0.21 | 0.09  | 4.66 | C | E | 0.27 | 0.43  | 5.56 | C | E | 0.27 | 0.33  | 5.37 | C | E | 0.24 | 0.26  | 6.50 | C | E | 0.24 | 0.21  | 6.53 | C | E | 0.18 | 0.27  | 6.39  | C | E | 0.26 | 0.42  | 6.60 |
| 441 | C | E | 0.30 | 0.52  | 5.50 | C | E | 0.23 | 0.23  | 4.61 | C | E | 0.28 | 0.43  | 5.50 | C | E | 0.28 | 0.51  | 5.35 | C | E | 0.22 | 0.22  | 6.49 | C | E | 0.25 | 0.37  | 6.47 | C | E | 0.21 | 0.36  | 6.32  | C | E | 0.27 | 0.43  | 6.56 |
| 442 | C | E | 0.32 | 0.60  | 5.45 | C | E | 0.24 | 0.50  | 4.56 | C | E | 0.31 | 0.46  | 5.38 | C | E | 0.29 | 0.62  | 5.35 | C | E | 0.24 | 0.34  | 6.47 | C | E | 0.26 | 0.45  | 6.46 | C | E | 0.21 | 0.52  | 6.30  | C | E | 0.29 | 0.59  | 6.49 |
| 443 | C | E | 0.32 | 0.60  | 5.50 | C | E | 0.26 | 0.47  | 4.57 | C | E | 0.32 | 0.41  | 5.40 | C | E | 0.29 | 0.55  | 5.42 | C | E | 0.24 | 0.35  | 6.52 | C | E | 0.30 | 0.53  | 6.44 | C | E | 0.22 | 0.36  | 6.30  | C | E | 0.31 | 0.52  | 6.51 |
| 444 | C | E | 0.31 | 0.50  | 5.46 | C | E | 0.27 | 0.38  | 4.53 | C | E | 0.31 | 0.34  | 5.32 | C | E | 0.32 | 0.50  | 5.39 | C | E | 0.24 | 0.26  | 6.50 | C | E | 0.30 | 0.43  | 6.42 | C | E | 0.25 | 0.32  | 6.23  | C | E | 0.32 | 0.44  | 6.46 |
| 445 | C | E | 0.32 | 0.42  | 5.52 | C | E | 0.28 | 0.26  | 4.56 | C | E | 0.31 | 0.31  | 5.35 | C | E | 0.32 | 0.34  | 5.46 | C | E | 0.25 | 0.15  | 6.55 | C | E | 0.30 | 0.34  | 6.47 | C | E | 0.25 | 0.21  | 6.25  | C | E | 0.32 | 0.34  | 6.48 |
| 446 | C | B | 0.32 | 0.14  | 5.54 | C | B | 0.27 | 0.08  | 4.59 | C | B | 0.31 | 0.12  | 5.36 | C | B | 0.33 | 0.00  | 5.49 | C | B | 0.26 | 0.01  | 6.56 | C | B | 0.29 | 0.08  | 6.49 | C | B | 0.23 | 0.06  | 6.29  | C | B | 0.32 | 0.18  | 6.52 |
| 447 | C | E | 0.32 | 0.26  | 5.57 | C | E | 0.30 | 0.22  | 4.57 | C | E | 0.29 | 0.33  | 5.30 | C | E | 0.32 | 0.14  | 5.56 | C | E | 0.28 | 0.22  | 6.68 | C | E | 0.32 | 0.24  | 6.48 | C | E | 0.25 | 0.16  | 6.35  | C | E | 0.31 | 0.28  | 6.60 |
| 448 | C | E | 0.32 | 0.35  | 5.77 | C | E | 0.30 | 0.19  | 4.80 | C | E | 0.28 | 0.37  | 5.50 | C | E | 0.33 | 0.18  | 6.22 | C | E | 0.26 | 0.27  | 7.07 | C | E | 0.31 | 0.30  | 6.86 | C | E | 0.26 | 0.19  | 6.67  | C | E | 0.30 | 0.34  | 7.35 |
| 449 | C | E | 0.33 | 0.25  | 6.18 | C | E | 0.33 | 0.04  | 4.60 | C | E | 0.28 | 0.27  | 5.46 | C | E | 0.34 | 0.06  | 5.66 | C | E | 0.29 | 0.17  | 7.08 | C | E | 0.32 | 0.24  | 7.40 | C | E | 0.28 | 0.09  | 6.65  | C | E | 0.31 | 0.25  | 6.98 |
| 450 | C | E | 0.34 | 0.30  | 6.07 | C | E | 0.31 | -0.05 | 5.58 | C | E | 0.27 | 0.35  | 5.70 | C | E | 0.32 | 0.07  | 5.88 | C | E | 0.28 | 0.13  | 7.51 | C | E | 0.32 | 0.24  | 7.54 | C | E | 0.28 | 0.13  | 7.72  | C | E | 0.31 | 0.29  | 7.73 |
| 451 | H | E | 0.32 | 0.35  | 6.08 | C | E | 0.28 | 0.04  | 6.01 | C | E | 0.25 | 0.36  | 6.06 | C | E | 0.28 | 0.17  | 6.07 | C | E | 0.26 | 0.23  | 8.70 | C | E | 0.29 | 0.22  | 8.65 | C | E | 0.26 | 0.17  | 7.99  | C | E | 0.28 | 0.33  | 8.59 |
| 452 | H | E | 0.35 | 0.10  | 6.55 | C | E | 0.30 | 0.07  | 5.61 | C | E | 0.28 | 0.13  | 5.61 | C | E | 0.31 | 0.05  | 7.09 | H | E | 0.28 | 0.15  | 9.39 | H | E | 0.31 | 0.03  | 8.10 | C | E | 0.28 | 0.01  | 9.14  | C | E | 0.29 | 0.18  | 9.78 |
| 453 | H | E | 0.35 | 0.03  | 6.61 | C | E | 0.30 | 0.02  | 5.66 | C | E | 0.29 | 0.08  | 5.42 | C | E | 0.31 | -0.03 | 6.39 | H | E | 0.28 | 0.11  | 9.56 | H | E | 0.32 | 0.04  | 8.02 | C | E | 0.30 | -0.04 | 10.20 | C | E | 0.31 | 0.12  | 9.80 |
| 454 | H | E | 0.36 | 0.02  | 6.34 | C | E | 0.30 | -0.03 | 5.86 | C | E | 0.32 | 0.08  | 5.62 | C | E | 0.33 | -0.06 | 5.56 | C | E | 0.31 | 0.09  | 9.52 | C | E | 0.32 | 0.05  | 7.93 | C | E | 0.30 | 0.02  | 9.76  | C | E | 0.32 | 0.08  | 8.39 |
| 455 | C | E | 0.37 | -0.12 | 6.38 | C | E | 0.32 | -0.12 | 4.73 | C | E | 0.33 | 0.01  | 5.38 | C | E | 0.35 | -0.14 | 6.29 | C | E | 0.32 | -0.05 | 8.38 | C | E | 0.32 | -0.04 | 7.55 | C | E | 0.30 | -0.14 | 7.84  | C | E | 0.33 | 0.03  | 8.54 |
| 456 | C | E | 0.36 | -0.19 | 6.25 | C | E | 0.34 | -0.19 | 5.15 | C | B | 0.33 | -0.16 | 4.98 | C | E | 0.36 | -0.25 | 7.23 | C | E | 0.32 | -0.14 | 7.18 | C | E | 0.34 | -0.20 | 8.06 | C | E | 0.31 | -0.25 | 6.52  | C | E | 0.32 | -0.07 | 8.09 |
| 457 | C | E | 0.37 | 0.03  | 5.14 | C | E | 0.34 | 0.01  | 5.81 | C | E | 0.33 | 0.08  | 4.69 | C | E | 0.37 | -0.00 | 6.18 | C | E | 0.33 | 0.03  | 6.18 | C | E | 0.33 | 0.04  | 8.43 | C | E | 0.31 | -0.06 | 5.92  | C | E | 0.32 | 0.08  | 6.09 |
| 458 | C | E | 0.35 | 0.12  | 4.93 | C | E | 0.33 | 0.10  | 4.95 | C | E | 0.34 | 0.30  | 4.60 | C | E | 0.37 | 0.18  | 5.17 | C | E | 0.34 | 0.20  | 6.06 | C | E | 0.32 | 0.24  | 7.56 | C | E | 0.31 | -0.15 | 5.89  | C | E | 0.33 | 0.30  | 5.99 |
| 459 | C | E | 0.38 | -0.02 | 4.91 | C | E | 0.36 | -0.08 | 4.34 | C | E | 0.36 | 0.06  | 4.53 | C | E | 0.38 | -0.00 | 4.97 | C | E | 0.36 | -0.08 | 5.96 | C | E | 0.37 | 0.03  | 6.60 | C | E | 0.33 | -0.13 | 5.83  | C | E | 0.35 | 0.11  | 5.96 |
| 460 | C | E | 0.38 | -0.04 | 4.84 | C | E | 0.37 | -0.06 | 4.04 | C | E | 0.38 | 0.07  | 4.39 | C | E | 0.38 | -0.05 | 4.89 | C | E | 0.36 | 0.01  | 5.89 | C | E | 0.38 | -0.00 | 6.14 | C | E | 0.35 | -0.13 | 5.70  | C | E | 0.36 | 0.08  | 5.86 |
| 461 | C | E | 0.39 | -0.05 | 4.79 | C | E | 0.40 | 0.06  | 3.90 | C | E | 0.38 | 0.04  | 4.35 | C | E | 0.41 | -0.05 | 4.70 | C | E | 0.39 | 0.09  | 5.76 | C | E | 0.39 | -0.04 | 6.11 | C | E | 0.36 | -0.10 | 5.66  | C | E | 0.38 | 0.04  | 5.72 |
| 462 | C | E | 0.40 | -0.01 | 4.65 | C | E | 0.38 | 0.06  | 3.87 | C | E | 0.39 | 0.03  | 4.27 | C | E | 0.37 | -0.14 | 4.64 | C | E | 0.40 | 0.16  | 5.68 | C | E | 0.40 | -0.03 | 6.17 | C | E | 0.37 | -0.07 | 5.62  | C | E | 0.41 | 0.02  | 5.63 |
| 463 | C | E | 0.51 | -0.10 | 4.29 | C | E | 0.50 | 0.05  | 3.55 | C | E | 0.48 | -0.08 | 3.91 | C | E | 0.44 | -0.27 | 4.37 | C | E | 0.51 | 0.07  | 5.21 | C | E | 0.49 | -0.15 | 5.54 | C | E | 0.47 | -0.17 | 5.18  | C | E | 0.51 | -0.05 | 5.18 |
| 464 | C | B | 0.52 | -0.21 | 4.22 | C | B | 0.53 | -0.05 | 3.46 | C | B | 0.51 | -0.22 | 3.77 | C | B | 0.47 | -0.41 | 4.36 | C | E | 0.51 | -0.08 | 5.12 | C | B | 0.52 | -0.36 | 5.70 | C | B | 0.48 | -0.28 | 5.08  | C | B | 0.51 | -0.21 | 5.09 |
| 465 | C | E | 0.52 | -0.28 | 4.18 | C | E | 0.52 | -0.02 | 3.44 | C | E | 0.51 | -0.22 | 3.75 | C | E | 0.51 | -0.38 | 4.16 | C | E | 0.50 | -0.21 | 5.06 | C | E | 0.51 | -0.38 | 5.28 | C | E | 0.49 | -0.25 | 5.03  | C | E | 0.52 | -0.19 | 5.03 |
| 466 | C | B | 0.53 | -0.42 | 4.19 | C | E | 0.53 | -0.13 | 3.47 | C | E | 0.51 | -0.39 | 3.85 | C | E | 0.51 | -0.55 | 4.40 | C | B | 0.51 | -0.40 | 5.12 | C | E | 0.50 | -0.47 | 5.41 | C | E | 0.49 | -0.39 | 5.09  | C | E | 0.52 | -0.40 | 5.09 |
| 467 | C | B | 0.53 | -0.45 | 4.16 | C | B | 0.55 | -0.07 | 3.47 | C | B | 0.52 | -0.41 | 3.91 | C | B | 0.54 | -0.56 | 4.22 | C | B | 0.52 | -0.33 | 5.12 | C | B | 0.53 | -0.41 | 5.22 | C | B | 0.49 | -0.45 | 5.12  | C | B | 0.52 | -0.38 | 5.11 |
| 468 | C | E | 0.56 | -0.23 | 4.16 | C | E | 0.56 | -0.05 | 3.49 | C | E | 0.53 | -0.15 | 3.99 | C | E | 0.56 | -0.31 | 4.29 | C | E | 0.52 | -0.14 | 5.13 | C | E | 0.54 | -0.25 | 5.21 | C | E | 0.50 | -0.23 | 5.15  | C | E | 0.56 | -0.13 | 5.11 |
| 469 | C | E | 0.58 | -0.23 | 4.24 | C | E | 0.57 | -0.16 | 3.57 | C | E | 0.55 | -0.10 | 4.09 | C | E | 0.57 | -0.27 | 4.39 | C | E | 0.53 | -0.16 | 5.18 | C | E | 0.54 | -0.25 | 5.27 | C | E | 0.51 | -0.21 | 5.26  | C | E | 0.57 | -0.10 |      |

|     |   |   |      |       |      |   |   |      |       |      |   |   |      |       |      |   |   |      |       |      |   |   |      |       |      |   |   |      |       |      |   |   |      |       |      |   |   |      |       |      |
|-----|---|---|------|-------|------|---|---|------|-------|------|---|---|------|-------|------|---|---|------|-------|------|---|---|------|-------|------|---|---|------|-------|------|---|---|------|-------|------|---|---|------|-------|------|
| 484 | H | E | 0.42 | 0.36  | 5.40 | C | E | 0.50 | 0.65  | 4.15 | C | E | 0.38 | 0.34  | 4.49 | C | E | 0.47 | 0.31  | 5.10 | C | E | 0.38 | 0.49  | 6.69 | C | E | 0.42 | 0.42  | 7.76 | C | E | 0.37 | 0.43  | 7.27 | C | E | 0.43 | 0.43  | 6.69 |
| 485 | H | E | 0.35 | 0.45  | 6.37 | C | E | 0.40 | 1.02  | 4.94 | H | E | 0.35 | 0.37  | 5.29 | C | E | 0.43 | 0.37  | 5.50 | C | E | 0.36 | 0.52  | 8.35 | C | E | 0.35 | 0.64  | 9.37 | C | E | 0.34 | 0.70  | 8.80 | C | E | 0.36 | 0.57  | 7.35 |
| 486 | H | E | 0.31 | 0.55  | 6.69 | C | E | 0.37 | 1.06  | 6.43 | H | E | 0.28 | 0.44  | 6.04 | C | E | 0.32 | 0.39  | 6.14 | C | E | 0.30 | 0.58  | 9.74 | C | E | 0.30 | 0.94  | 9.47 | C | E | 0.26 | 0.82  | 9.82 | C | E | 0.28 | 0.58  | 8.53 |
| 487 | C | E | 0.35 | 0.66  | 6.32 | C | E | 0.38 | 0.97  | 6.07 | H | E | 0.32 | 0.79  | 5.85 | C | E | 0.36 | 0.66  | 5.94 | C | E | 0.35 | 0.74  | 8.36 | C | E | 0.35 | 1.17  | 9.38 | C | E | 0.32 | 1.08  | 9.21 | C | E | 0.35 | 0.78  | 8.10 |
| 488 | C | E | 0.40 | 0.59  | 5.18 | C | E | 0.45 | 0.98  | 4.42 | C | E | 0.38 | 0.84  | 5.26 | C | E | 0.40 | 0.84  | 5.12 | C | E | 0.40 | 0.75  | 7.04 | C | E | 0.41 | 1.08  | 8.27 | C | E | 0.38 | 1.03  | 6.65 | C | E | 0.42 | 0.74  | 6.62 |
| 489 | C | E | 0.48 | 0.62  | 4.50 | C | E | 0.47 | 0.85  | 4.66 | C | E | 0.42 | 0.89  | 4.58 | C | E | 0.42 | 0.79  | 5.06 | C | E | 0.42 | 0.70  | 7.53 | C | E | 0.44 | 0.92  | 7.02 | C | E | 0.41 | 0.93  | 6.72 | C | E | 0.44 | 0.70  | 6.82 |
| 490 | C | E | 0.61 | 0.48  | 4.09 | C | E | 0.60 | 0.62  | 3.73 | C | E | 0.54 | 0.62  | 3.76 | C | E | 0.54 | 0.63  | 4.13 | C | E | 0.58 | 0.52  | 5.25 | C | E | 0.58 | 0.73  | 5.42 | C | E | 0.55 | 0.69  | 5.21 | C | E | 0.58 | 0.56  | 5.29 |
| 491 | H | E | 0.65 | 0.38  | 3.96 | C | E | 0.67 | 0.65  | 3.51 | H | E | 0.62 | 0.51  | 3.77 | C | E | 0.63 | 0.48  | 4.05 | H | E | 0.63 | 0.40  | 5.17 | C | E | 0.65 | 0.63  | 5.41 | C | E | 0.63 | 0.54  | 5.17 | C | E | 0.66 | 0.47  | 5.14 |
| 492 | H | E | 0.70 | 0.40  | 3.98 | C | E | 0.71 | 0.55  | 3.48 | H | E | 0.71 | 0.49  | 3.70 | C | E | 0.68 | 0.42  | 4.22 | H | E | 0.70 | 0.44  | 4.96 | C | E | 0.69 | 0.61  | 5.29 | C | E | 0.69 | 0.53  | 4.89 | C | E | 0.71 | 0.48  | 5.17 |
| 493 | H | E | 0.72 | 0.21  | 3.82 | H | E | 0.75 | 0.32  | 3.26 | H | E | 0.72 | 0.29  | 3.51 | H | E | 0.71 | 0.23  | 4.28 | H | E | 0.71 | 0.24  | 4.83 | H | E | 0.72 | 0.37  | 5.12 | H | E | 0.70 | 0.27  | 4.64 | H | E | 0.73 | 0.27  | 4.70 |
| 494 | H | E | 0.72 | -0.04 | 3.71 | H | E | 0.75 | 0.00  | 3.22 | H | E | 0.74 | -0.01 | 3.45 | H | E | 0.75 | -0.02 | 3.94 | H | E | 0.71 | -0.11 | 4.70 | H | E | 0.72 | 0.04  | 5.03 | H | E | 0.72 | -0.03 | 4.59 | H | E | 0.74 | -0.02 | 4.65 |
| 495 | H | E | 0.75 | -0.03 | 3.70 | H | E | 0.80 | 0.03  | 3.16 | H | E | 0.77 | -0.10 | 3.46 | H | E | 0.78 | -0.09 | 3.89 | H | E | 0.72 | -0.08 | 4.69 | H | E | 0.75 | -0.07 | 4.95 | H | E | 0.73 | -0.10 | 4.57 | H | E | 0.76 | -0.10 | 4.60 |
| 496 | H | E | 0.78 | -0.22 | 3.73 | H | E | 0.80 | -0.18 | 3.16 | H | B | 0.80 | -0.23 | 3.42 | H | E | 0.80 | -0.25 | 3.95 | H | E | 0.75 | -0.18 | 4.69 | H | E | 0.75 | -0.19 | 4.93 | H | E | 0.75 | -0.20 | 4.56 | H | E | 0.79 | -0.20 | 4.59 |
| 497 | H | B | 0.85 | -0.46 | 3.61 | H | B | 0.81 | -0.46 | 3.12 | H | B | 0.85 | -0.50 | 3.29 | H | B | 0.84 | -0.54 | 3.87 | H | B | 0.81 | -0.38 | 4.56 | H | B | 0.83 | -0.44 | 4.81 | H | B | 0.82 | -0.47 | 4.42 | H | B | 0.85 | -0.46 | 4.46 |
| 498 | H | E | 0.85 | -0.32 | 3.55 | H | E | 0.82 | -0.43 | 3.08 | H | B | 0.85 | -0.48 | 3.28 | H | B | 0.86 | -0.53 | 3.79 | H | E | 0.82 | -0.33 | 4.49 | H | B | 0.84 | -0.40 | 4.74 | H | B | 0.83 | -0.45 | 4.40 | H | B | 0.86 | -0.49 | 4.42 |
| 499 | H | E | 0.85 | -0.20 | 3.61 | H | E | 0.82 | -0.37 | 3.08 | H | E | 0.85 | -0.33 | 3.33 | H | E | 0.86 | -0.36 | 3.84 | H | E | 0.82 | -0.21 | 4.52 | H | E | 0.85 | -0.28 | 4.73 | H | E | 0.83 | -0.35 | 4.44 | H | E | 0.87 | -0.35 | 4.45 |
| 500 | H | B | 0.84 | -0.33 | 3.57 | H | B | 0.82 | -0.45 | 3.05 | H | B | 0.85 | -0.47 | 3.24 | H | B | 0.86 | -0.47 | 3.81 | H | B | 0.81 | -0.36 | 4.48 | H | B | 0.85 | -0.41 | 4.68 | H | B | 0.83 | -0.46 | 4.41 | H | B | 0.87 | -0.42 | 4.41 |
| 501 | H | B | 0.84 | -0.38 | 3.55 | H | B | 0.82 | -0.46 | 3.04 | H | B | 0.85 | -0.50 | 3.28 | H | B | 0.86 | -0.51 | 3.76 | H | B | 0.81 | -0.41 | 4.45 | H | B | 0.85 | -0.46 | 4.64 | H | B | 0.83 | -0.51 | 4.43 | H | B | 0.87 | -0.50 | 4.41 |
| 502 | H | E | 0.82 | -0.11 | 3.63 | H | E | 0.82 | -0.23 | 3.07 | H | E | 0.83 | -0.25 | 3.36 | H | E | 0.86 | -0.31 | 3.84 | H | E | 0.78 | -0.13 | 4.53 | H | B | 0.84 | -0.24 | 4.68 | H | B | 0.82 | -0.33 | 4.48 | H | B | 0.85 | -0.35 | 4.49 |
| 503 | H | E | 0.82 | 0.01  | 3.66 | H | E | 0.82 | -0.12 | 3.05 | H | E | 0.83 | -0.14 | 3.32 | H | E | 0.86 | -0.19 | 3.83 | H | E | 0.79 | -0.01 | 4.50 | H | E | 0.84 | -0.08 | 4.65 | H | E | 0.82 | -0.10 | 4.46 | H | E | 0.86 | -0.14 | 4.45 |
| 504 | H | B | 0.79 | -0.07 | 3.61 | H | B | 0.80 | -0.23 | 3.03 | H | B | 0.80 | -0.32 | 3.32 | H | B | 0.86 | -0.32 | 3.75 | H | B | 0.76 | -0.22 | 4.48 | H | B | 0.78 | -0.21 | 4.64 | H | B | 0.81 | -0.27 | 4.48 | H | B | 0.84 | -0.28 | 4.46 |
| 505 | C | E | 0.79 | 0.15  | 3.69 | C | E | 0.78 | -0.07 | 3.15 | H | E | 0.82 | -0.04 | 3.38 | C | E | 0.84 | -0.10 | 3.86 | C | E | 0.78 | -0.01 | 4.60 | C | E | 0.82 | 0.05  | 4.74 | C | E | 0.80 | -0.02 | 4.63 | C | E | 0.83 | -0.03 | 4.62 |
| 506 | C | E | 0.79 | 0.37  | 3.72 | C | E | 0.81 | 0.09  | 3.12 | C | E | 0.81 | 0.13  | 3.43 | C | E | 0.84 | 0.04  | 3.88 | C | E | 0.76 | 0.25  | 4.60 | C | E | 0.81 | 0.23  | 4.71 | C | E | 0.78 | 0.14  | 4.60 | C | E | 0.82 | 0.13  | 4.61 |
| 507 | C | E | 0.80 | 0.46  | 3.75 | C | B | 0.81 | 0.19  | 3.16 | C | B | 0.82 | 0.15  | 3.41 | C | B | 0.84 | 0.09  | 3.93 | C | E | 0.78 | 0.42  | 4.60 | C | B | 0.80 | 0.27  | 4.74 | C | E | 0.79 | 0.24  | 4.60 | C | E | 0.83 | 0.21  | 4.61 |
| 508 | C | E | 0.81 | 0.38  | 3.72 | C | B | 0.81 | 0.21  | 3.13 | C | B | 0.82 | 0.29  | 3.35 | C | B | 0.84 | 0.22  | 3.90 | C | E | 0.79 | 0.38  | 4.54 | C | E | 0.82 | 0.39  | 4.67 | C | E | 0.80 | 0.32  | 4.56 | C | E | 0.84 | 0.35  | 4.57 |
| 509 | H | B | 0.82 | 0.17  | 3.60 | H | B | 0.81 | 0.12  | 3.03 | C | B | 0.81 | 0.20  | 3.31 | C | B | 0.82 | 0.13  | 3.86 | H | B | 0.78 | 0.19  | 4.42 | C | B | 0.80 | 0.23  | 4.68 | H | B | 0.79 | 0.15  | 4.50 | C | B | 0.82 | 0.17  | 4.59 |
| 510 | H | E | 0.82 | 0.14  | 3.59 | H | E | 0.81 | 0.13  | 3.03 | H | E | 0.81 | 0.16  | 3.19 | H | E | 0.83 | 0.16  | 3.79 | H | E | 0.78 | 0.15  | 4.42 | H | E | 0.80 | 0.24  | 4.58 | H | E | 0.79 | 0.16  | 4.44 | H | E | 0.82 | 0.19  | 4.46 |
| 511 | H | E | 0.82 | -0.14 | 3.60 | H | E | 0.81 | -0.17 | 3.04 | H | E | 0.81 | -0.11 | 3.21 | H | E | 0.83 | -0.21 | 3.82 | H | E | 0.77 | -0.16 | 4.47 | H | E | 0.80 | -0.08 | 4.63 | H | E | 0.79 | -0.15 | 4.45 | H | E | 0.82 | -0.11 | 4.48 |
| 512 | H | B | 0.85 | -0.25 | 3.50 | H | B | 0.83 | -0.27 | 2.97 | H | B | 0.84 | -0.19 | 3.16 | H | B | 0.86 | -0.33 | 3.72 | H | B | 0.80 | -0.30 | 4.37 | H | B | 0.83 | -0.20 | 4.54 | H | B | 0.82 | -0.28 | 4.40 | H | B | 0.85 | -0.24 | 4.40 |
| 513 | H | E | 0.84 | -0.24 | 3.46 | H | E | 0.83 | -0.21 | 2.94 | H | E | 0.84 | -0.18 | 3.08 | H | E | 0.86 | -0.26 | 3.67 | H | E | 0.80 | -0.27 | 4.31 | H | E | 0.82 | -0.15 | 4.51 | H | E | 0.82 | -0.21 | 4.35 | H | E | 0.85 | -0.15 | 4.35 |
| 514 | H | E | 0.84 | -0.30 | 3.49 | H | E | 0.82 | -0.31 | 2.98 | H | E | 0.83 | -0.30 | 3.08 | H | E | 0.85 | -0.35 | 3.72 | H | E | 0.81 | -0.30 | 4.34 | H | E | 0.82 | -0.30 | 4.57 | H | E | 0.82 | -0.33 | 4.34 | H | E | 0.85 | -0.31 | 4.36 |
| 515 | H | B | 0.85 | -0.48 | 3.48 | H | B | 0.82 | -0.50 | 2.99 | H | B | 0.84 | -0.47 | 3.12 | H | B | 0.85 | -0.54 | 3.74 | H | B | 0.81 | -0.48 | 4.37 | H | B | 0.83 | -0.50 | 4.60 | H | B | 0.82 | -0.53 | 4.36 | H | B | 0.85 | -0.54 | 4.37 |
| 516 | H | B | 0.85 | -0.43 | 3.41 | H | B | 0.82 | -0.46 | 2.95 | H | B | 0.84 | -0.45 | 3.08 | H | B | 0.85 | -0.51 | 3.65 | H | B | 0.81 | -0.45 | 4.30 | H | B | 0.83 | -0.49 | 4.54 | H | B | 0.82 | -0.51 | 4.34 | H | B | 0.85 | -0.50 | 4.33 |
| 517 | H | E | 0.85 | -0.26 | 3.38 | H | E | 0.82 | -0.31 | 2.95 | H | E | 0.84 | -0.29 | 3.03 | H | E | 0.85 | -0.35 | 3.62 | H | E | 0.81 | -0.29 | 4.28 | H | E | 0.83 | -0.36 | 4.54 | H | E | 0.82 | -0.34 | 4.30 | H | E | 0.85 | -0.32 | 4.31 |
| 518 | H | E | 0.85 | -0.23 | 3.43 | H | E | 0.83 | -0.29 | 2.98 | H | E | 0.85 | -0.28 | 3.06 | H | E | 0.86 | -0.28 | 3.68 | H | E | 0.82 | -0.28 | 4.34 | H | E | 0.84 | -0.30 | 4.61 | H | E | 0.82 | -0.27 | 4.31 | H | E | 0.86 | -0.25 | 4.33 |
| 519 | H | B | 0.85 | -0.38 | 3.40 | H | B | 0.83 | -0.44 | 2.99 | H | B | 0.85 | -0.42 | 3.10 | H | B | 0.86 | -0.48 | 3.64 | H | B | 0.82 | -0.44 | 4.33 | H | B | 0.84 | -0.43 | 4.60 | H | B | 0.82 | -0.43 | 4.32 | H | B | 0.86 | -0.40 | 4.32 |
| 520 | H | E | 0.83 | -0.25 | 3.35 | H | E | 0.81 | -0.37 | 2.99 | H | E | 0.83 | -0.33 | 3.07 | H | E | 0.83 | -0.41 | 3.58 | H | B | 0.80 | -0.32 | 4.28 | H | E | 0.82 | -0.31 | 4.58 | H | B | 0.81 | -0.32 | 4.31 | H | E | 0.85 | -0.30 | 4.30 |
| 521 | H | E | 0.82 | -0.08 | 3.37 | H | E | 0.80 | -0.13 | 3.02 | H | E | 0.82 | -0.12 | 3.07 | H | E | 0.82 | -0.17 | 3.62 | H | E | 0.78 | -0.14 | 4.32 | H | E | 0.81 | -0.14 | 4.65 | H | E | 0.79 | -0.12 | 4.31 | H | E | 0.83 | -0.13 | 4.34 |
| 522 | H | E | 0.83 | -0.16 | 3.40 | H | E | 0.81 | -0.18 | 3.05 | H | E | 0.83 | -0.21 | 3.13 | H | E | 0.83 | -0.21 | 3.66 | H | E | 0.80 | -0.22 | 4.36 | H | E | 0.82 | -0.18 | 4.68 | H | E | 0.81 | -0.17 | 4.31 | H | E | 0.85 | -0.20 | 4.34 |
| 523 | H | B | 0.84 | -0.24 | 3.34 | H | B | 0.81 | -0.25 | 3.09 | H | B | 0.84 | -0.29 | 3.16 | H | B | 0.83 | -0.26 | 3.58 | H | B | 0.81 | -0.26 | 4.39 | H | B | 0.83 | -0.26 | 4.64 | H | B | 0.82 | -0.23 | 4.37 | H | B | 0.85 | -0.27 |      |

|     |   |   |      |       |      |   |   |      |       |      |   |   |      |       |      |   |   |      |       |      |   |   |      |       |      |   |   |      |       |      |   |   |      |       |      |   |   |      |       |      |
|-----|---|---|------|-------|------|---|---|------|-------|------|---|---|------|-------|------|---|---|------|-------|------|---|---|------|-------|------|---|---|------|-------|------|---|---|------|-------|------|---|---|------|-------|------|
| 538 | H | B | 0.82 | -0.57 | 3.59 | H | B | 0.84 | -0.65 | 3.06 | H | B | 0.82 | -0.63 | 3.51 | H | B | 0.87 | -0.66 | 3.70 | H | B | 0.82 | -0.62 | 4.44 | H | B | 0.83 | -0.59 | 4.66 | H | B | 0.82 | -0.63 | 4.48 | H | B | 0.85 | -0.63 | 4.50 |
| 539 | H | B | 0.82 | -0.61 | 3.52 | H | B | 0.84 | -0.61 | 3.03 | H | B | 0.82 | -0.67 | 3.49 | H | B | 0.88 | -0.70 | 3.62 | H | B | 0.82 | -0.62 | 4.39 | H | B | 0.83 | -0.59 | 4.61 | H | B | 0.82 | -0.63 | 4.47 | H | B | 0.85 | -0.61 | 4.48 |
| 540 | H | E | 0.82 | -0.41 | 3.59 | H | E | 0.83 | -0.37 | 3.11 | H | E | 0.83 | -0.42 | 3.62 | H | E | 0.87 | -0.44 | 3.67 | H | E | 0.82 | -0.42 | 4.47 | H | E | 0.83 | -0.37 | 4.68 | H | E | 0.82 | -0.46 | 4.53 | H | E | 0.84 | -0.43 | 4.57 |
| 541 | C | E | 0.85 | -0.12 | 3.67 | C | E | 0.85 | -0.12 | 3.14 | C | E | 0.84 | -0.15 | 3.66 | C | E | 0.87 | -0.19 | 3.78 | C | E | 0.83 | -0.14 | 4.52 | C | E | 0.85 | -0.06 | 4.71 | C | E | 0.83 | -0.16 | 4.57 | C | E | 0.86 | -0.14 | 4.61 |
| 542 | C | E | 0.83 | 0.15  | 3.75 | C | E | 0.84 | 0.20  | 3.21 | C | E | 0.80 | 0.13  | 3.80 | C | E | 0.84 | 0.10  | 3.84 | C | E | 0.81 | 0.12  | 4.59 | C | E | 0.82 | 0.22  | 4.76 | C | E | 0.80 | 0.17  | 4.66 | C | E | 0.82 | 0.13  | 4.75 |
| 543 | C | E | 0.81 | 0.17  | 3.79 | C | E | 0.81 | 0.17  | 3.23 | C | E | 0.79 | 0.12  | 3.76 | C | E | 0.81 | 0.07  | 3.90 | C | E | 0.78 | 0.11  | 4.63 | C | E | 0.80 | 0.22  | 4.78 | C | E | 0.78 | 0.18  | 4.70 | C | E | 0.81 | 0.17  | 4.75 |
| 544 | C | B | 0.80 | -0.03 | 3.73 | C | B | 0.81 | -0.13 | 3.14 | C | B | 0.78 | -0.14 | 3.68 | C | B | 0.83 | -0.12 | 3.81 | C | B | 0.79 | -0.05 | 4.52 | C | B | 0.79 | -0.04 | 4.73 | C | B | 0.78 | -0.12 | 4.64 | C | B | 0.82 | -0.11 | 4.63 |
| 545 | C | E | 0.85 | 0.18  | 3.63 | C | E | 0.86 | 0.23  | 3.09 | C | E | 0.86 | 0.15  | 3.51 | C | E | 0.88 | 0.12  | 3.76 | C | E | 0.84 | 0.17  | 4.43 | C | E | 0.85 | 0.19  | 4.60 | C | E | 0.84 | 0.13  | 4.55 | C | E | 0.88 | 0.12  | 4.55 |
| 546 | H | E | 0.85 | 0.04  | 3.53 | H | E | 0.86 | 0.07  | 3.03 | H | E | 0.86 | 0.01  | 3.42 | H | E | 0.88 | -0.02 | 3.65 | H | E | 0.84 | 0.05  | 4.33 | H | E | 0.85 | 0.03  | 4.50 | H | E | 0.84 | 0.06  | 4.51 | H | E | 0.88 | 0.01  | 4.48 |
| 547 | H | E | 0.85 | -0.18 | 3.50 | H | E | 0.82 | -0.10 | 3.01 | H | E | 0.86 | -0.17 | 3.32 | H | E | 0.84 | -0.19 | 3.67 | H | E | 0.84 | -0.17 | 4.28 | H | E | 0.85 | -0.13 | 4.47 | H | E | 0.84 | -0.14 | 4.45 | H | E | 0.88 | -0.18 | 4.41 |
| 548 | H | B | 0.85 | -0.43 | 3.51 | H | B | 0.82 | -0.41 | 3.02 | H | B | 0.86 | -0.43 | 3.34 | H | B | 0.84 | -0.42 | 3.70 | H | B | 0.84 | -0.41 | 4.32 | H | B | 0.85 | -0.38 | 4.51 | H | B | 0.84 | -0.38 | 4.46 | H | B | 0.88 | -0.41 | 4.42 |
| 549 | H | B | 0.84 | -0.57 | 3.46 | H | B | 0.86 | -0.61 | 2.97 | H | E | 0.85 | -0.52 | 3.35 | H | E | 0.87 | -0.53 | 3.60 | H | B | 0.83 | -0.61 | 4.29 | H | E | 0.85 | -0.45 | 4.49 | H | E | 0.84 | -0.48 | 4.44 | H | E | 0.88 | -0.49 | 4.39 |
| 550 | H | B | 0.84 | -0.69 | 3.39 | H | B | 0.86 | -0.82 | 2.91 | H | E | 0.85 | -0.68 | 3.24 | H | E | 0.87 | -0.69 | 3.54 | H | B | 0.83 | -0.70 | 4.22 | H | E | 0.85 | -0.64 | 4.43 | H | E | 0.84 | -0.66 | 4.40 | H | E | 0.88 | -0.66 | 4.33 |
| 551 | H | B | 0.84 | -0.68 | 3.40 | H | B | 0.86 | -0.86 | 2.90 | H | B | 0.85 | -0.75 | 3.19 | H | B | 0.88 | -0.76 | 3.56 | H | B | 0.83 | -0.68 | 4.24 | H | B | 0.85 | -0.73 | 4.46 | H | B | 0.84 | -0.76 | 4.38 | H | B | 0.87 | -0.72 | 4.33 |
| 552 | H | B | 0.84 | -0.70 | 3.41 | H | B | 0.86 | -0.83 | 2.93 | H | B | 0.86 | -0.77 | 3.24 | H | B | 0.88 | -0.78 | 3.57 | H | B | 0.83 | -0.73 | 4.27 | H | B | 0.85 | -0.73 | 4.51 | H | B | 0.84 | -0.76 | 4.39 | H | B | 0.87 | -0.72 | 4.34 |
| 553 | H | B | 0.84 | -0.72 | 3.33 | H | B | 0.86 | -0.80 | 2.90 | H | B | 0.86 | -0.75 | 3.21 | H | B | 0.88 | -0.80 | 3.48 | H | B | 0.83 | -0.76 | 4.22 | H | B | 0.85 | -0.70 | 4.46 | H | B | 0.84 | -0.71 | 4.36 | H | B | 0.87 | -0.67 | 4.30 |
| 554 | H | B | 0.84 | -0.69 | 3.30 | H | B | 0.86 | -0.80 | 2.87 | H | B | 0.86 | -0.77 | 3.11 | H | E | 0.88 | -0.80 | 3.47 | H | B | 0.83 | -0.74 | 4.18 | H | E | 0.85 | -0.66 | 4.43 | H | E | 0.84 | -0.67 | 4.33 | H | E | 0.87 | -0.64 | 4.27 |
| 555 | H | B | 0.85 | -0.67 | 3.32 | H | B | 0.86 | -0.81 | 2.91 | H | B | 0.86 | -0.85 | 3.13 | H | B | 0.88 | -0.87 | 3.51 | H | B | 0.84 | -0.70 | 4.22 | H | B | 0.85 | -0.78 | 4.49 | H | B | 0.84 | -0.78 | 4.32 | H | B | 0.87 | -0.77 | 4.28 |
| 556 | H | B | 0.84 | -0.73 | 3.29 | H | B | 0.85 | -0.78 | 2.93 | H | B | 0.86 | -0.81 | 3.19 | H | B | 0.87 | -0.83 | 3.46 | H | B | 0.84 | -0.74 | 4.21 | H | B | 0.85 | -0.78 | 4.49 | H | B | 0.84 | -0.79 | 4.31 | H | B | 0.87 | -0.76 | 4.27 |
| 557 | H | B | 0.84 | -0.63 | 3.23 | H | B | 0.85 | -0.72 | 2.90 | H | B | 0.86 | -0.72 | 3.11 | H | B | 0.87 | -0.76 | 3.39 | H | B | 0.84 | -0.64 | 4.15 | H | B | 0.85 | -0.69 | 4.44 | H | B | 0.84 | -0.70 | 4.28 | H | B | 0.87 | -0.66 | 4.23 |
| 558 | H | B | 0.85 | -0.57 | 3.24 | H | B | 0.85 | -0.65 | 2.91 | H | B | 0.86 | -0.64 | 3.04 | H | B | 0.87 | -0.71 | 3.42 | H | B | 0.84 | -0.58 | 4.15 | H | B | 0.85 | -0.61 | 4.45 | H | B | 0.83 | -0.62 | 4.27 | H | B | 0.87 | -0.59 | 4.23 |
| 559 | H | B | 0.82 | -0.57 | 3.29 | H | B | 0.83 | -0.62 | 2.96 | H | B | 0.84 | -0.65 | 3.13 | H | B | 0.85 | -0.67 | 3.47 | H | B | 0.78 | -0.59 | 4.27 | H | B | 0.81 | -0.60 | 4.57 | H | B | 0.82 | -0.60 | 4.30 | H | B | 0.84 | -0.60 | 4.29 |
| 560 | H | B | 0.78 | -0.54 | 3.27 | H | B | 0.80 | -0.62 | 2.99 | H | B | 0.78 | -0.59 | 3.24 | H | B | 0.82 | -0.63 | 3.42 | H | B | 0.75 | -0.56 | 4.30 | H | B | 0.78 | -0.53 | 4.59 | H | B | 0.77 | -0.56 | 4.35 | H | B | 0.78 | -0.55 | 4.42 |
| 561 | H | E | 0.75 | -0.09 | 3.27 | H | E | 0.80 | -0.23 | 2.98 | H | E | 0.75 | -0.17 | 3.19 | H | E | 0.82 | -0.18 | 3.39 | H | E | 0.73 | -0.13 | 4.28 | H | E | 0.75 | -0.12 | 4.60 | H | E | 0.75 | -0.13 | 4.36 | H | E | 0.76 | -0.12 | 4.44 |
| 562 | H | E | 0.75 | -0.07 | 3.37 | H | E | 0.78 | -0.24 | 3.08 | H | E | 0.76 | -0.09 | 3.22 | H | E | 0.81 | -0.09 | 3.50 | H | E | 0.74 | -0.09 | 4.40 | H | E | 0.75 | -0.09 | 4.74 | H | E | 0.75 | -0.07 | 4.45 | H | E | 0.77 | -0.06 | 4.46 |
| 563 | C | B | 0.75 | -0.05 | 3.38 | C | B | 0.77 | -0.25 | 3.12 | C | B | 0.75 | -0.14 | 3.43 | C | B | 0.78 | -0.07 | 3.52 | C | B | 0.72 | -0.04 | 4.45 | C | B | 0.74 | -0.10 | 4.80 | C | B | 0.75 | -0.02 | 4.45 | C | B | 0.76 | -0.02 | 4.47 |
| 564 | C | E | 0.75 | 0.25  | 3.35 | C | B | 0.78 | 0.05  | 3.18 | C | B | 0.75 | 0.06  | 3.49 | C | E | 0.79 | 0.08  | 3.43 | C | B | 0.73 | 0.19  | 4.42 | C | E | 0.75 | 0.12  | 4.76 | C | E | 0.75 | 0.11  | 4.42 | C | E | 0.77 | 0.18  | 4.45 |
| 565 | H | E | 0.73 | 0.34  | 3.43 | H | E | 0.77 | 0.09  | 3.15 | H | E | 0.75 | 0.24  | 3.54 | H | E | 0.75 | 0.23  | 3.46 | H | E | 0.72 | 0.27  | 4.53 | H | E | 0.72 | 0.34  | 4.84 | C | E | 0.73 | 0.35  | 4.46 | H | E | 0.74 | 0.37  | 4.52 |
| 566 | H | B | 0.68 | 0.07  | 3.52 | H | B | 0.77 | -0.11 | 3.16 | H | B | 0.70 | 0.02  | 3.55 | H | E | 0.74 | -0.03 | 3.53 | H | B | 0.69 | 0.04  | 4.59 | H | B | 0.72 | 0.05  | 4.86 | H | B | 0.72 | 0.06  | 4.55 | H | E | 0.72 | 0.09  | 4.53 |
| 567 | H | B | 0.70 | -0.19 | 3.49 | H | B | 0.73 | -0.34 | 3.15 | H | B | 0.68 | -0.20 | 3.64 | H | B | 0.73 | -0.28 | 3.53 | H | B | 0.68 | -0.18 | 4.59 | H | B | 0.70 | -0.21 | 4.85 | H | B | 0.69 | -0.21 | 4.60 | H | B | 0.71 | -0.14 | 4.56 |
| 568 | H | E | 0.71 | 0.09  | 3.46 | H | E | 0.74 | -0.09 | 3.23 | H | E | 0.68 | 0.02  | 3.70 | H | E | 0.73 | 0.05  | 3.50 | H | E | 0.68 | 0.08  | 4.56 | H | E | 0.73 | -0.04 | 4.89 | H | E | 0.71 | -0.03 | 4.50 | H | E | 0.72 | -0.01 | 4.56 |
| 569 | H | E | 0.73 | 0.18  | 3.50 | H | E | 0.76 | 0.08  | 3.24 | H | E | 0.73 | 0.11  | 3.72 | H | E | 0.77 | 0.14  | 3.51 | H | E | 0.70 | 0.20  | 4.58 | H | E | 0.74 | 0.11  | 4.93 | H | E | 0.73 | 0.16  | 4.50 | H | E | 0.75 | 0.12  | 4.55 |
| 570 | H | B | 0.75 | -0.13 | 3.49 | H | B | 0.76 | -0.25 | 3.20 | H | B | 0.74 | -0.25 | 3.64 | H | B | 0.77 | -0.22 | 3.53 | H | B | 0.70 | -0.15 | 4.57 | H | B | 0.75 | -0.25 | 4.87 | H | B | 0.75 | -0.22 | 4.48 | H | B | 0.75 | -0.23 | 4.53 |
| 571 | H | B | 0.76 | -0.42 | 3.39 | H | B | 0.75 | -0.50 | 3.14 | H | B | 0.75 | -0.49 | 3.62 | H | B | 0.76 | -0.54 | 3.46 | H | B | 0.71 | -0.43 | 4.50 | H | B | 0.76 | -0.48 | 4.72 | H | B | 0.75 | -0.52 | 4.45 | H | B | 0.76 | -0.47 | 4.50 |
| 572 | H | E | 0.77 | -0.22 | 3.43 | H | E | 0.78 | -0.23 | 3.16 | H | E | 0.77 | -0.25 | 3.68 | H | E | 0.78 | -0.26 | 3.45 | H | E | 0.72 | -0.22 | 4.52 | H | E | 0.78 | -0.24 | 4.71 | H | E | 0.77 | -0.31 | 4.46 | H | E | 0.77 | -0.23 | 4.54 |
| 573 | H | E | 0.77 | -0.20 | 3.49 | H | E | 0.78 | -0.22 | 3.14 | H | E | 0.77 | -0.25 | 3.66 | H | E | 0.78 | -0.21 | 3.53 | H | E | 0.72 | -0.18 | 4.54 | H | E | 0.78 | -0.23 | 4.74 | H | E | 0.77 | -0.24 | 4.47 | H | E | 0.77 | -0.19 | 4.55 |
| 574 | H | B | 0.77 | -0.56 | 3.42 | H | B | 0.78 | -0.55 | 3.09 | H | B | 0.77 | -0.58 | 3.56 | H | B | 0.78 | -0.55 | 3.51 | H | B | 0.72 | -0.53 | 4.47 | H | B | 0.78 | -0.59 | 4.67 | H | B | 0.77 | -0.57 | 4.45 | H | B | 0.77 | -0.54 | 4.50 |
| 575 | H | B | 0.77 | -0.65 | 3.39 | H | B | 0.78 | -0.60 | 3.10 | H | B | 0.77 | -0.64 | 3.58 | H | B | 0.79 | -0.61 | 3.45 | H | B | 0.72 | -0.63 | 4.47 | H | B | 0.78 | -0.65 | 4.63 | H | B | 0.77 | -0.62 | 4.46 | H | B | 0.77 | -0.60 | 4.52 |
| 576 | H | E | 0.77 | -0.47 | 3.48 | H | E | 0.77 | -0.41 | 3.15 | H | E | 0.75 | -0.46 | 3.69 | H | E | 0.79 | -0.45 | 3.52 | H | E | 0.72 | -0.50 | 4.53 | H | E | 0.78 | -0.51 | 4.68 | H | E | 0.75 | -0.49 | 4.52 | H | E | 0.75 | -0.47 | 4.61 |
| 577 | H | B | 0.77 | -0.50 | 3.48 | H | B | 0.77 | -0.50 | 3.12 | H | B | 0.75 | -0.54 | 3.61 | H | B | 0.79 | -0.51 | 3.56 | H | B | 0.72 | -0.49 | 4.50 | H | B | 0.78 | -0.55 | 4.65 | H | B | 0.75 | -0.55 | 4.53 | H | B | 0.75 | -0.56 |      |

|     |   |   |      |       |      |   |   |      |       |      |   |   |      |       |      |   |   |      |       |      |   |   |      |       |      |   |   |      |       |      |   |   |      |       |      |   |   |      |       |      |
|-----|---|---|------|-------|------|---|---|------|-------|------|---|---|------|-------|------|---|---|------|-------|------|---|---|------|-------|------|---|---|------|-------|------|---|---|------|-------|------|---|---|------|-------|------|
| 592 | H | E | 0.76 | -0.43 | 3.28 | H | B | 0.80 | -0.54 | 2.95 | H | B | 0.76 | -0.51 | 3.25 | H | B | 0.82 | -0.56 | 3.42 | H | E | 0.74 | -0.40 | 4.24 | H | B | 0.77 | -0.50 | 4.52 | H | E | 0.77 | -0.49 | 4.42 | H | B | 0.78 | -0.47 | 4.44 |
| 593 | H | B | 0.77 | -0.61 | 3.29 | H | B | 0.79 | -0.66 | 3.00 | H | B | 0.77 | -0.67 | 3.35 | H | B | 0.82 | -0.65 | 3.42 | H | B | 0.74 | -0.55 | 4.29 | H | B | 0.78 | -0.61 | 4.55 | H | B | 0.78 | -0.61 | 4.42 | H | B | 0.78 | -0.62 | 4.48 |
| 594 | H | B | 0.78 | -0.61 | 3.21 | H | B | 0.79 | -0.65 | 3.00 | H | B | 0.78 | -0.64 | 3.32 | H | B | 0.82 | -0.64 | 3.33 | H | E | 0.75 | -0.56 | 4.25 | H | B | 0.78 | -0.63 | 4.51 | H | B | 0.78 | -0.63 | 4.38 | H | B | 0.78 | -0.66 | 4.44 |
| 595 | H | E | 0.78 | -0.53 | 3.18 | H | E | 0.80 | -0.54 | 2.96 | H | E | 0.78 | -0.58 | 3.22 | H | E | 0.82 | -0.54 | 3.32 | H | E | 0.75 | -0.52 | 4.20 | H | E | 0.79 | -0.56 | 4.48 | H | E | 0.79 | -0.56 | 4.34 | H | E | 0.79 | -0.55 | 4.38 |
| 596 | H | B | 0.78 | -0.57 | 3.23 | H | B | 0.80 | -0.57 | 2.99 | H | B | 0.78 | -0.61 | 3.28 | H | B | 0.82 | -0.57 | 3.37 | H | B | 0.75 | -0.61 | 4.25 | H | B | 0.79 | -0.58 | 4.55 | H | B | 0.79 | -0.61 | 4.36 | H | B | 0.79 | -0.56 | 4.41 |
| 597 | H | B | 0.78 | -0.66 | 3.24 | H | B | 0.81 | -0.61 | 3.03 | H | B | 0.78 | -0.65 | 3.39 | H | B | 0.83 | -0.64 | 3.34 | H | B | 0.75 | -0.70 | 4.30 | H | B | 0.79 | -0.66 | 4.58 | H | B | 0.79 | -0.63 | 4.38 | H | B | 0.79 | -0.59 | 4.45 |
| 598 | H | B | 0.79 | -0.54 | 3.17 | H | E | 0.82 | -0.41 | 3.02 | H | E | 0.79 | -0.45 | 3.34 | H | B | 0.84 | -0.50 | 3.26 | H | B | 0.76 | -0.56 | 4.24 | H | B | 0.81 | -0.47 | 4.53 | H | E | 0.80 | -0.42 | 4.34 | H | E | 0.80 | -0.42 | 4.41 |
| 599 | H | E | 0.81 | -0.40 | 3.17 | H | E | 0.82 | -0.26 | 3.02 | H | E | 0.82 | -0.33 | 3.26 | H | E | 0.85 | -0.33 | 3.30 | H | E | 0.78 | -0.40 | 4.22 | H | E | 0.82 | -0.32 | 4.56 | H | E | 0.82 | -0.36 | 4.32 | H | E | 0.82 | -0.36 | 4.37 |
| 600 | H | B | 0.81 | -0.42 | 3.22 | H | B | 0.82 | -0.34 | 3.04 | H | B | 0.82 | -0.33 | 3.36 | H | B | 0.85 | -0.30 | 3.33 | H | B | 0.78 | -0.43 | 4.28 | H | B | 0.82 | -0.30 | 4.59 | H | B | 0.82 | -0.35 | 4.32 | H | B | 0.82 | -0.35 | 4.40 |
| 601 | H | B | 0.82 | -0.24 | 3.19 | H | E | 0.83 | 0.01  | 3.06 | H | E | 0.82 | -0.05 | 3.42 | H | E | 0.87 | 0.01  | 3.25 | H | B | 0.78 | -0.28 | 4.28 | H | E | 0.83 | -0.07 | 4.56 | H | E | 0.83 | -0.07 | 4.29 | H | E | 0.83 | -0.09 | 4.39 |
| 602 | H | E | 0.82 | -0.01 | 3.16 | H | E | 0.83 | 0.12  | 3.05 | H | E | 0.82 | 0.06  | 3.37 | H | E | 0.87 | 0.13  | 3.21 | H | E | 0.78 | -0.06 | 4.24 | H | E | 0.83 | 0.02  | 4.53 | H | E | 0.84 | 0.01  | 4.25 | H | E | 0.83 | 0.01  | 4.36 |
| 603 | H | E | 0.84 | 0.01  | 3.18 | H | E | 0.85 | 0.07  | 3.00 | H | E | 0.82 | 0.01  | 3.36 | H | E | 0.88 | 0.08  | 3.23 | H | B | 0.80 | -0.07 | 4.24 | H | E | 0.85 | 0.10  | 4.51 | H | E | 0.83 | 0.04  | 4.27 | H | E | 0.84 | 0.03  | 4.30 |
| 604 | C | E | 0.80 | 0.14  | 3.28 | C | E | 0.86 | 0.19  | 3.06 | C | E | 0.81 | 0.20  | 3.50 | C | E | 0.88 | 0.18  | 3.27 | C | E | 0.78 | 0.13  | 4.26 | C | E | 0.82 | 0.23  | 4.63 | C | E | 0.82 | 0.19  | 4.36 | C | E | 0.82 | 0.18  | 4.41 |
| 605 | C | E | 0.79 | 0.19  | 3.31 | C | E | 0.83 | 0.16  | 3.15 | C | E | 0.79 | 0.12  | 3.61 | C | E | 0.85 | 0.13  | 3.26 | C | E | 0.76 | 0.13  | 4.40 | C | E | 0.80 | 0.11  | 4.68 | C | E | 0.79 | 0.11  | 4.40 | C | E | 0.80 | 0.12  | 4.47 |
| 606 | H | B | 0.82 | -0.09 | 3.25 | H | B | 0.83 | -0.16 | 3.15 | H | B | 0.83 | -0.20 | 3.60 | H | B | 0.83 | -0.10 | 3.20 | H | B | 0.81 | -0.09 | 4.30 | H | B | 0.82 | -0.24 | 4.58 | H | B | 0.81 | -0.24 | 4.34 | H | B | 0.82 | -0.25 | 4.43 |
| 607 | H | E | 0.83 | 0.00  | 3.30 | H | E | 0.85 | 0.04  | 3.18 | H | E | 0.85 | -0.02 | 3.69 | H | E | 0.85 | 0.06  | 3.21 | H | E | 0.82 | -0.05 | 4.33 | H | E | 0.82 | -0.06 | 4.63 | H | E | 0.82 | -0.01 | 4.34 | H | E | 0.84 | -0.08 | 4.45 |
| 608 | H | E | 0.82 | -0.10 | 3.31 | H | E | 0.84 | -0.06 | 3.15 | H | E | 0.84 | -0.14 | 3.65 | H | E | 0.85 | -0.06 | 3.26 | H | E | 0.79 | -0.18 | 4.37 | H | E | 0.82 | -0.13 | 4.63 | H | E | 0.82 | -0.10 | 4.35 | H | E | 0.83 | -0.16 | 4.43 |
| 609 | H | B | 0.83 | -0.29 | 3.27 | H | B | 0.84 | -0.28 | 3.12 | H | B | 0.85 | -0.36 | 3.60 | H | B | 0.85 | -0.30 | 3.23 | H | B | 0.80 | -0.38 | 4.34 | H | B | 0.82 | -0.33 | 4.59 | H | B | 0.82 | -0.33 | 4.34 | H | B | 0.85 | -0.32 | 4.41 |
| 610 | H | B | 0.82 | -0.35 | 3.31 | H | B | 0.84 | -0.23 | 3.18 | H | B | 0.84 | -0.36 | 3.72 | H | B | 0.84 | -0.31 | 3.22 | H | B | 0.81 | -0.35 | 4.36 | H | B | 0.84 | -0.29 | 4.59 | H | B | 0.84 | -0.27 | 4.34 | H | B | 0.85 | -0.30 | 4.47 |
| 611 | H | E | 0.83 | -0.06 | 3.37 | H | E | 0.85 | -0.04 | 3.21 | H | E | 0.85 | -0.06 | 3.79 | H | E | 0.87 | -0.01 | 3.25 | H | E | 0.82 | -0.11 | 4.41 | H | E | 0.84 | -0.06 | 4.67 | H | E | 0.82 | -0.01 | 4.38 | H | E | 0.85 | -0.07 | 4.51 |
| 612 | H | E | 0.84 | -0.05 | 3.37 | H | E | 0.88 | -0.01 | 3.14 | H | E | 0.85 | -0.03 | 3.72 | H | E | 0.87 | -0.04 | 3.29 | H | E | 0.82 | -0.04 | 4.40 | H | E | 0.82 | -0.03 | 4.68 | H | E | 0.83 | 0.02  | 4.38 | H | E | 0.85 | -0.03 | 4.48 |
| 613 | H | B | 0.85 | -0.21 | 3.35 | H | B | 0.88 | -0.18 | 3.16 | H | B | 0.86 | -0.17 | 3.73 | H | B | 0.86 | -0.21 | 3.29 | H | B | 0.82 | -0.24 | 4.41 | H | B | 0.83 | -0.15 | 4.63 | H | B | 0.83 | -0.12 | 4.39 | H | B | 0.84 | -0.16 | 4.53 |
| 614 | H | E | 0.84 | -0.14 | 3.41 | H | E | 0.88 | -0.06 | 3.25 | H | E | 0.86 | -0.09 | 3.84 | H | E | 0.88 | -0.11 | 3.26 | H | B | 0.82 | -0.19 | 4.46 | C | E | 0.83 | -0.01 | 4.76 | C | E | 0.84 | -0.02 | 4.51 | C | E | 0.84 | -0.03 | 4.69 |
| 615 | H | E | 0.85 | -0.02 | 3.51 | H | E | 0.88 | 0.10  | 3.26 | H | E | 0.87 | 0.01  | 3.95 | H | E | 0.89 | 0.03  | 3.31 | H | E | 0.84 | -0.04 | 4.48 | C | E | 0.83 | 0.09  | 4.80 | C | E | 0.84 | 0.06  | 4.54 | C | E | 0.86 | 0.05  | 4.71 |
| 616 | H | E | 0.85 | -0.02 | 3.43 | H | E | 0.88 | 0.12  | 3.23 | H | E | 0.88 | 0.03  | 3.87 | H | E | 0.89 | 0.02  | 3.33 | H | E | 0.84 | 0.00  | 4.45 | C | E | 0.84 | 0.06  | 4.74 | C | E | 0.84 | 0.05  | 4.53 | C | E | 0.87 | 0.03  | 4.67 |
| 617 | H | B | 0.85 | -0.12 | 3.42 | H | B | 0.88 | -0.09 | 3.26 | C | B | 0.88 | -0.08 | 3.86 | C | B | 0.88 | -0.08 | 3.35 | H | B | 0.84 | -0.12 | 4.45 | C | B | 0.85 | -0.07 | 4.71 | C | B | 0.84 | -0.04 | 4.54 | C | B | 0.87 | -0.04 | 4.71 |
| 618 | C | E | 0.86 | 0.16  | 3.57 | C | E | 0.88 | 0.14  | 3.39 | C | E | 0.88 | 0.14  | 3.99 | C | E | 0.88 | 0.24  | 3.41 | C | E | 0.85 | 0.18  | 4.60 | C | E | 0.85 | 0.17  | 4.76 | C | E | 0.85 | 0.25  | 4.57 | C | E | 0.88 | 0.21  | 4.78 |
| 619 | C | E | 0.88 | 0.33  | 3.56 | C | E | 0.88 | 0.41  | 3.34 | C | E | 0.88 | 0.34  | 3.98 | C | E | 0.88 | 0.35  | 3.44 | C | E | 0.85 | 0.34  | 4.55 | C | E | 0.85 | 0.31  | 4.73 | C | E | 0.84 | 0.38  | 4.54 | C | E | 0.88 | 0.32  | 4.72 |
| 620 | C | E | 0.86 | 0.45  | 3.64 | C | E | 0.88 | 0.50  | 3.38 | C | E | 0.86 | 0.46  | 4.06 | C | E | 0.89 | 0.50  | 3.49 | C | E | 0.84 | 0.47  | 4.60 | H | E | 0.83 | 0.44  | 4.83 | C | E | 0.82 | 0.46  | 4.59 | C | E | 0.86 | 0.40  | 4.80 |
| 621 | C | E | 0.88 | 0.38  | 3.59 | H | E | 0.88 | 0.37  | 3.36 | H | E | 0.88 | 0.35  | 4.01 | H | E | 0.88 | 0.40  | 3.55 | C | E | 0.85 | 0.41  | 4.53 | H | E | 0.85 | 0.27  | 4.75 | H | E | 0.84 | 0.34  | 4.61 | H | E | 0.88 | 0.28  | 4.79 |
| 622 | H | E | 0.87 | 0.09  | 3.51 | H | E | 0.88 | 0.09  | 3.29 | H | E | 0.86 | 0.11  | 3.90 | H | E | 0.88 | 0.08  | 3.44 | H | E | 0.85 | 0.14  | 4.45 | H | E | 0.85 | 0.03  | 4.60 | H | E | 0.83 | 0.06  | 4.51 | H | E | 0.88 | 0.04  | 4.67 |
| 623 | H | E | 0.85 | -0.10 | 3.49 | H | E | 0.88 | -0.01 | 3.22 | H | E | 0.85 | -0.04 | 3.81 | H | E | 0.88 | -0.03 | 3.46 | H | E | 0.83 | -0.03 | 4.42 | H | E | 0.84 | -0.09 | 4.58 | H | E | 0.82 | -0.07 | 4.50 | H | E | 0.86 | -0.07 | 4.63 |
| 624 | H | B | 0.86 | -0.25 | 3.44 | H | B | 0.87 | -0.23 | 3.19 | H | B | 0.85 | -0.20 | 3.78 | H | B | 0.87 | -0.17 | 3.42 | H | B | 0.83 | -0.26 | 4.42 | H | B | 0.83 | -0.27 | 4.60 | H | E | 0.82 | -0.26 | 4.48 | H | B | 0.86 | -0.31 | 4.58 |
| 625 | H | B | 0.86 | -0.34 | 3.39 | H | B | 0.87 | -0.35 | 3.22 | H | E | 0.86 | -0.28 | 3.78 | H | B | 0.87 | -0.30 | 3.35 | H | B | 0.83 | -0.32 | 4.40 | H | E | 0.83 | -0.32 | 4.58 | H | E | 0.82 | -0.33 | 4.47 | H | E | 0.86 | -0.38 | 4.59 |
| 626 | H | E | 0.86 | -0.38 | 3.35 | H | E | 0.87 | -0.43 | 3.18 | H | E | 0.86 | -0.38 | 3.70 | H | E | 0.87 | -0.38 | 3.34 | H | E | 0.83 | -0.35 | 4.35 | H | E | 0.83 | -0.41 | 4.53 | H | E | 0.82 | -0.39 | 4.46 | H | E | 0.85 | -0.45 | 4.57 |
| 627 | H | B | 0.86 | -0.51 | 3.31 | H | B | 0.87 | -0.57 | 3.11 | H | B | 0.86 | -0.51 | 3.61 | H | B | 0.88 | -0.55 | 3.33 | H | B | 0.83 | -0.48 | 4.31 | H | B | 0.83 | -0.52 | 4.51 | H | B | 0.82 | -0.52 | 4.43 | H | B | 0.85 | -0.56 | 4.50 |
| 628 | H | B | 0.86 | -0.58 | 3.29 | H | B | 0.87 | -0.61 | 3.12 | H | B | 0.86 | -0.59 | 3.64 | H | B | 0.88 | -0.60 | 3.29 | H | B | 0.83 | -0.57 | 4.33 | H | B | 0.83 | -0.62 | 4.53 | H | B | 0.82 | -0.62 | 4.41 | H | B | 0.85 | -0.63 | 4.49 |
| 629 | H | B | 0.86 | -0.61 | 3.24 | H | B | 0.87 | -0.63 | 3.12 | H | B | 0.86 | -0.62 | 3.62 | H | B | 0.88 | -0.62 | 3.22 | H | B | 0.84 | -0.59 | 4.28 | H | B | 0.83 | -0.63 | 4.49 | H | B | 0.82 | -0.64 | 4.40 | H | B | 0.86 | -0.64 | 4.48 |
| 630 | H | B | 0.86 | -0.64 | 3.20 | H | B | 0.87 | -0.63 | 3.05 | H | B | 0.86 | -0.64 | 3.50 | H | B | 0.88 | -0.69 | 3.22 | H | B | 0.84 | -0.64 | 4.23 | H | B | 0.83 | -0.68 | 4.44 | H | B | 0.82 | -0.67 | 4.38 | H | B | 0.86 | -0.68 | 4.41 |
| 631 | H | B | 0.86 | -0.71 | 3.19 | H | B | 0.87 | -0.67 | 3.03 | H | B | 0.86 | -0.73 | 3.49 | H | B | 0.88 | -0.75 | 3.22 | H | B | 0.84 | -0.69 | 4.23 | H | B | 0.83 | -0.76 | 4.47 | H | B | 0.82 | -0.73 | 4.36 | H | B | 0.86 | -0.75 | 4.38 |
| 632 | H | B | 0.86 | -     |      |   |   |      |       |      |   |   |      |       |      |   |   |      |       |      |   |   |      |       |      |   |   |      |       |      |   |   |      |       |      |   |   |      |       |      |

|     |   |   |      |       |      |   |   |      |       |      |   |   |      |       |      |   |   |      |       |      |   |   |      |       |      |   |   |      |       |      |   |   |      |       |      |   |   |      |         |      |
|-----|---|---|------|-------|------|---|---|------|-------|------|---|---|------|-------|------|---|---|------|-------|------|---|---|------|-------|------|---|---|------|-------|------|---|---|------|-------|------|---|---|------|---------|------|
| 646 | H | E | 0.86 | -0.31 | 3.25 | H | E | 0.88 | -0.32 | 3.27 | H | E | 0.87 | -0.45 | 3.79 | H | E | 0.88 | -0.36 | 3.08 | H | E | 0.85 | -0.26 | 4.25 | H | E | 0.86 | -0.46 | 4.53 | H | E | 0.85 | -0.42 | 4.34 | H | E | 0.88 | -0.45   | 4.54 |
| 647 | H | B | 0.87 | -0.40 | 3.25 | H | B | 0.88 | -0.42 | 3.25 | H | B | 0.87 | -0.49 | 3.78 | H | B | 0.88 | -0.41 | 3.10 | H | B | 0.85 | -0.38 | 4.29 | H | B | 0.86 | -0.52 | 4.54 | H | B | 0.85 | -0.50 | 4.33 | H | B | 0.88 | -0.51   | 4.52 |
| 648 | H | B | 0.87 | -0.52 | 3.23 | H | B | 0.88 | -0.47 | 3.24 | H | B | 0.87 | -0.55 | 3.76 | H | B | 0.88 | -0.47 | 3.09 | H | B | 0.85 | -0.47 | 4.28 | H | B | 0.86 | -0.58 | 4.50 | H | B | 0.85 | -0.55 | 4.34 | H | B | 0.88 | -0.53   | 4.52 |
| 649 | H | E | 0.85 | -0.29 | 3.28 | H | E | 0.87 | -0.27 | 3.31 | H | E | 0.87 | -0.30 | 3.83 | H | E | 0.88 | -0.22 | 3.09 | H | E | 0.85 | -0.26 | 4.30 | H | E | 0.85 | -0.30 | 4.54 | H | E | 0.85 | -0.30 | 4.37 | H | E | 0.88 | -0.28   | 4.60 |
| 650 | H | E | 0.85 | -0.15 | 3.34 | H | E | 0.87 | -0.07 | 3.35 | H | E | 0.87 | -0.17 | 3.91 | H | E | 0.88 | -0.04 | 3.12 | H | E | 0.85 | -0.14 | 4.36 | H | E | 0.85 | -0.12 | 4.60 | H | E | 0.85 | -0.15 | 4.39 | H | E | 0.88 | -0.16   | 4.63 |
| 651 | H | B | 0.86 | -0.24 | 3.34 | H | B | 0.87 | -0.12 | 3.33 | H | B | 0.87 | -0.23 | 3.90 | H | B | 0.88 | -0.12 | 3.15 | H | B | 0.85 | -0.18 | 4.39 | H | B | 0.86 | -0.24 | 4.57 | H | B | 0.85 | -0.19 | 4.39 | H | B | 0.88 | -0.22   | 4.62 |
| 652 | H | B | 0.85 | -0.09 | 3.36 | H | B | 0.87 | -0.03 | 3.37 | H | B | 0.85 | -0.13 | 3.93 | H | B | 0.88 | -0.03 | 3.15 | H | B | 0.82 | -0.08 | 4.42 | H | B | 0.85 | -0.14 | 4.59 | H | B | 0.84 | -0.12 | 4.44 | H | B | 0.87 | -0.14   | 4.69 |
| 653 | H | E | 0.85 | 0.30  | 3.43 | H | E | 0.84 | 0.23  | 3.48 | H | E | 0.85 | 0.26  | 4.06 | H | E | 0.86 | 0.27  | 3.21 | H | E | 0.82 | 0.30  | 4.50 | H | E | 0.85 | 0.23  | 4.68 | H | E | 0.84 | 0.29  | 4.49 | H | E | 0.88 | 0.28    | 4.77 |
| 654 | C | E | 0.84 | 0.42  | 3.52 | C | E | 0.83 | 0.37  | 3.52 | C | E | 0.82 | 0.37  | 4.15 | C | E | 0.82 | 0.33  | 3.30 | C | E | 0.82 | 0.40  | 4.59 | C | E | 0.83 | 0.38  | 4.77 | C | E | 0.82 | 0.44  | 4.57 | C | E | 0.85 | 0.39    | 4.86 |
| 655 | C | E | 0.81 | 0.66  | 3.67 | C | E | 0.81 | 0.66  | 3.66 | C | E | 0.82 | 0.62  | 4.26 | C | E | 0.82 | 0.59  | 3.35 | C | E | 0.81 | 0.64  | 4.67 | C | E | 0.78 | 0.60  | 4.89 | C | E | 0.77 | 0.68  | 4.69 | C | E | 0.83 | 0.63    | 4.97 |
| 656 | C | E | 0.82 | 0.57  | 3.67 | C | E | 0.80 | 0.54  | 3.61 | C | E | 0.80 | 0.49  | 4.35 | C | E | 0.84 | 0.54  | 3.36 | C | E | 0.75 | 0.52  | 4.79 | C | E | 0.82 | 0.47  | 4.87 | C | E | 0.82 | 0.57  | 4.62 | C | E | 0.78 | 0.49    | 5.03 |
| 657 | C | E | 0.82 | 0.35  | 3.64 | C | E | 0.83 | 0.33  | 3.55 | C | E | 0.84 | 0.30  | 4.23 | C | E | 0.83 | 0.33  | 3.40 | C | E | 0.79 | 0.35  | 4.70 | C | E | 0.85 | 0.33  | 4.78 | C | E | 0.84 | 0.37  | 4.59 | C | E | 0.84 | 0.31    | 4.94 |
| 658 | H | B | 0.87 | 0.02  | 3.50 | H | B | 0.83 | -0.06 | 3.49 | H | B | 0.85 | -0.14 | 4.10 | H | B | 0.86 | -0.05 | 3.33 | H | B | 0.85 | 0.03  | 4.51 | H | B | 0.85 | -0.08 | 4.66 | H | B | 0.84 | -0.05 | 4.51 | H | B | 0.88 | -0.07   | 4.79 |
| 659 | H | E | 0.87 | -0.14 | 3.48 | H | E | 0.86 | -0.12 | 3.40 | H | E | 0.86 | -0.18 | 4.01 | H | E | 0.88 | -0.12 | 3.33 | H | E | 0.85 | -0.09 | 4.49 | H | E | 0.85 | -0.15 | 4.62 | H | E | 0.85 | -0.15 | 4.48 | H | E | 0.88 | -0.15   | 4.73 |
| 660 | H | B | 0.88 | -0.23 | 3.41 | H | B | 0.86 | -0.29 | 3.35 | H | B | 0.86 | -0.33 | 3.95 | H | B | 0.88 | -0.27 | 3.26 | H | B | 0.85 | -0.22 | 4.45 | H | B | 0.86 | -0.31 | 4.59 | H | B | 0.85 | -0.28 | 4.44 | H | B | 0.88 | -0.27   | 4.66 |
| 661 | H | B | 0.88 | -0.28 | 3.37 | H | B | 0.87 | -0.40 | 3.36 | H | B | 0.86 | -0.42 | 3.94 | H | B | 0.88 | -0.32 | 3.22 | H | B | 0.85 | -0.30 | 4.41 | H | B | 0.87 | -0.40 | 4.56 | H | B | 0.85 | -0.34 | 4.43 | H | B | 0.89 | -0.36   | 4.67 |
| 662 | H | E | 0.88 | -0.44 | 3.37 | H | E | 0.87 | -0.47 | 3.34 | H | E | 0.87 | -0.54 | 3.89 | H | E | 0.88 | -0.48 | 3.26 | H | E | 0.85 | -0.46 | 4.39 | H | E | 0.87 | -0.51 | 4.52 | H | E | 0.85 | -0.49 | 4.43 | H | E | 0.89 | -0.48   | 4.65 |
| 663 | H | B | 0.88 | -0.61 | 3.31 | H | B | 0.87 | -0.59 | 3.27 | H | B | 0.87 | -0.68 | 3.80 | H | B | 0.88 | -0.61 | 3.24 | H | B | 0.85 | -0.64 | 4.36 | H | B | 0.86 | -0.64 | 4.51 | H | B | 0.85 | -0.61 | 4.40 | H | B | 0.88 | -0.64   | 4.58 |
| 664 | H | B | 0.88 | -0.65 | 3.26 | H | B | 0.87 | -0.65 | 3.26 | H | B | 0.87 | -0.73 | 3.77 | H | B | 0.88 | -0.66 | 3.16 | H | B | 0.85 | -0.67 | 4.33 | H | B | 0.86 | -0.70 | 4.49 | H | B | 0.85 | -0.68 | 4.37 | H | B | 0.88 | -0.69   | 4.56 |
| 665 | H | B | 0.88 | -0.71 | 3.25 | H | B | 0.88 | -0.67 | 3.26 | H | B | 0.88 | -0.75 | 3.75 | H | B | 0.88 | -0.68 | 3.16 | H | B | 0.85 | -0.70 | 4.31 | H | B | 0.86 | -0.76 | 4.46 | H | B | 0.85 | -0.72 | 4.37 | H | B | 0.88 | -0.74   | 4.57 |
| 666 | H | E | 0.88 | -0.66 | 3.23 | H | E | 0.88 | -0.65 | 3.20 | H | E | 0.88 | -0.75 | 3.68 | H | E | 0.88 | -0.67 | 3.20 | H | E | 0.85 | -0.66 | 4.29 | H | E | 0.86 | -0.75 | 4.44 | H | E | 0.85 | -0.70 | 4.37 | H | E | 0.88 | -0.72   | 4.53 |
| 667 | H | B | 0.89 | -0.72 | 3.17 | H | B | 0.88 | -0.73 | 3.14 | H | B | 0.88 | -0.77 | 3.61 | H | B | 0.89 | -0.73 | 3.13 | H | B | 0.85 | -0.73 | 4.24 | H | B | 0.87 | -0.80 | 4.41 | H | B | 0.86 | -0.76 | 4.32 | H | B | 0.89 | -0.78   | 4.46 |
| 668 | H | B | 0.89 | -0.75 | 3.14 | H | B | 0.88 | -0.74 | 3.15 | H | B | 0.88 | -0.82 | 3.59 | H | B | 0.89 | -0.74 | 3.08 | H | B | 0.86 | -0.76 | 4.20 | H | B | 0.88 | -0.85 | 4.37 | H | B | 0.86 | -0.82 | 4.31 | H | B | 0.90 | -0.82   | 4.45 |
| 669 | H | E | 0.89 | -0.66 | 3.14 | H | B | 0.88 | -0.68 | 3.13 | H | B | 0.88 | -0.76 | 3.54 | H | E | 0.89 | -0.64 | 3.12 | H | E | 0.86 | -0.67 | 4.18 | H | B | 0.88 | -0.76 | 4.33 | H | B | 0.86 | -0.73 | 4.31 | H | B | 0.90 | -0.71   | 4.44 |
| 670 | H | B | 0.89 | -0.59 | 3.12 | H | B | 0.88 | -0.61 | 3.07 | H | B | 0.88 | -0.67 | 3.47 | H | B | 0.88 | -0.57 | 3.14 | H | B | 0.86 | -0.59 | 4.15 | H | B | 0.88 | -0.65 | 4.32 | H | B | 0.86 | -0.63 | 4.30 | H | B | 0.90 | -0.64   | 4.37 |
| 671 | H | B | 0.89 | -0.71 | 3.07 | H | B | 0.88 | -0.70 | 3.05 | H | B | 0.88 | -0.74 | 3.44 | H | B | 0.88 | -0.71 | 3.07 | H | B | 0.87 | -0.70 | 4.11 | H | B | 0.88 | -0.72 | 4.30 | H | B | 0.86 | -0.72 | 4.27 | H | B | 0.90 | -0.73   | 4.34 |
| 672 | H | B | 0.88 | -0.57 | 3.06 | H | B | 0.87 | -0.56 | 3.07 | H | B | 0.88 | -0.63 | 3.43 | H | B | 0.88 | -0.57 | 3.05 | H | B | 0.86 | -0.56 | 4.10 | H | B | 0.88 | -0.58 | 4.29 | H | B | 0.85 | -0.58 | 4.28 | H | B | 0.89 | -0.60   | 4.37 |
| 673 | H | E | 0.88 | -0.20 | 3.09 | H | E | 0.87 | -0.24 | 3.02 | H | E | 0.87 | -0.29 | 3.38 | H | E | 0.88 | -0.20 | 3.10 | H | E | 0.85 | -0.21 | 4.10 | H | E | 0.86 | -0.25 | 4.29 | H | E | 0.85 | -0.24 | 4.30 | H | E | 0.88 | -0.28   | 4.36 |
| 674 | H | B | 0.88 | -0.20 | 3.07 | H | B | 0.85 | -0.21 | 2.99 | H | B | 0.86 | -0.27 | 3.32 | H | B | 0.88 | -0.18 | 3.14 | H | B | 0.84 | -0.17 | 4.10 | H | B | 0.85 | -0.27 | 4.31 | H | B | 0.83 | -0.25 | 4.30 | H | B | 0.86 | -0.26   | 4.32 |
| 675 | C | B | 0.86 | -0.28 | 3.10 | C | B | 0.85 | -0.37 | 3.05 | C | B | 0.85 | -0.35 | 3.38 | H | B | 0.88 | -0.27 | 3.07 | C | B | 0.83 | -0.27 | 4.16 | H | B | 0.85 | -0.36 | 4.31 | H | B | 0.83 | -0.30 | 4.28 | H | B | 0.86 | -0.32   | 4.32 |
| 676 | C | B | 0.87 | 0.09  | 3.11 | C | B | 0.85 | 0.01  | 3.08 | C | B | 0.85 | 0.01  | 3.39 | H | B | 0.87 | -0.01 | 3.04 | C | B | 0.83 | 0.15  | 4.18 | H | B | 0.85 | -0.04 | 4.29 | H | B | 0.84 | -0.01 | 4.30 | H | B | 0.87 | -0.03   | 4.35 |
| 677 | H | E | 0.83 | 0.27  | 3.06 | H | E | 0.81 | 0.23  | 3.04 | H | E | 0.81 | 0.20  | 3.32 | H | E | 0.82 | 0.23  | 3.01 | H | E | 0.78 | 0.35  | 4.11 | H | E | 0.82 | 0.20  | 4.30 | H | E | 0.80 | 0.22  | 4.31 | H | E | 0.82 | 0.15    | 4.38 |
| 678 | H | E | 0.82 | 0.08  | 3.06 | H | B | 0.81 | 0.09  | 3.05 | H | B | 0.81 | -0.04 | 3.34 | H | B | 0.84 | 0.06  | 2.98 | H | B | 0.77 | 0.10  | 4.11 | H | B | 0.83 | 0.03  | 4.30 | H | B | 0.81 | 0.06  | 4.28 | H | B | 0.84 | -0.03   | 4.35 |
| 679 | H | B | 0.83 | -0.08 | 3.13 | H | B | 0.82 | -0.04 | 3.15 | H | B | 0.82 | -0.13 | 3.49 | H | B | 0.86 | -0.05 | 3.05 | C | B | 0.80 | -0.03 | 4.14 | H | B | 0.84 | -0.13 | 4.41 | H | B | 0.82 | -0.10 | 4.38 | H | B | 0.85 | -0.16   | 4.48 |
| 680 | H | B | 0.86 | 0.10  | 3.05 | H | B | 0.87 | 0.14  | 3.09 | H | B | 0.86 | 0.03  | 3.41 | H | B | 0.87 | 0.09  | 2.97 | H | B | 0.84 | 0.15  | 4.07 | H | B | 0.85 | 0.03  | 4.30 | H | B | 0.83 | 0.08  | 4.27 | H | B | 0.87 | 0.02    | 4.41 |
| 681 | H | E | 0.87 | 0.11  | 3.06 | H | E | 0.88 | 0.20  | 3.12 | H | E | 0.87 | 0.04  | 3.47 | H | E | 0.88 | 0.10  | 2.97 | H | E | 0.85 | 0.08  | 4.04 | H | E | 0.86 | 0.05  | 4.33 | H | E | 0.84 | 0.13  | 4.26 | H | E | 0.88 | 0.07    | 4.43 |
| 682 | H | B | 0.88 | -0.09 | 3.09 | H | B | 0.88 | 0.00  | 3.16 | H | B | 0.88 | -0.14 | 3.54 | H | B | 0.89 | -0.06 | 2.98 | H | B | 0.86 | -0.08 | 4.08 | H | B | 0.88 | -0.13 | 4.36 | H | B | 0.85 | -0.14 | 4.29 | H | B | 0.88 | -0.13   | 4.46 |
| 683 | H | B | 0.88 | -0.30 | 3.07 | H | B | 0.88 | -0.21 | 3.16 | H | B | 0.88 | -0.33 | 3.53 | H | B | 0.89 | -0.25 | 2.98 | H | B | 0.86 | -0.28 | 4.08 | H | B | 0.88 | -0.26 | 4.33 | H | B | 0.85 | -0.23 | 4.28 | H | B | 0.89 | -0.31   | 4.46 |
| 684 | H | E | 0.88 | -0.07 | 3.12 | H | E | 0.88 | -0.01 | 3.23 | H | E | 0.89 | -0.07 | 3.62 | H | E | 0.89 | -0.02 | 3.01 | H | E | 0.86 | -0.05 | 4.11 | H | E | 0.88 | -0.00 | 4.39 | H | E | 0.85 | 0.03  | 4.29 | H | E | 0.89 | -0.02   | 4.53 |
| 685 | H | E | 0.88 | -0.19 | 3.15 | H | E | 0.88 | -0.19 | 3.25 | H | E | 0.89 | -0.22 | 3.67 | H | E | 0.89 | -0.20 | 3.02 | H | E | 0.87 | -0.23 | 4.13 | H | E | 0.88 | -0.16 | 4.42 | H | E | 0.86 | -0.14 | 4.30 | H | E | 0.89 | -0.15</ |      |



|     |   |   |      |       |      |   |   |      |       |      |   |   |      |       |      |   |   |      |       |      |   |   |      |       |      |   |   |      |       |      |   |   |      |       |      |   |   |      |       |      |
|-----|---|---|------|-------|------|---|---|------|-------|------|---|---|------|-------|------|---|---|------|-------|------|---|---|------|-------|------|---|---|------|-------|------|---|---|------|-------|------|---|---|------|-------|------|
| 700 | H | E | 0.85 | -0.19 | 3.50 | H | E | 0.84 | -0.25 | 3.47 | H | E | 0.85 | -0.27 | 4.00 | H | E | 0.84 | -0.26 | 3.41 | H | E | 0.83 | -0.20 | 4.48 | H | E | 0.84 | -0.29 | 4.60 | H | E | 0.83 | -0.21 | 4.52 | H | E | 0.85 | -0.25 | 4.82 |
| 701 | H | B | 0.86 | -0.50 | 3.43 | H | B | 0.88 | -0.53 | 3.41 | H | B | 0.87 | -0.55 | 3.95 | H | B | 0.88 | -0.53 | 3.29 | H | B | 0.85 | -0.51 | 4.42 | H | B | 0.85 | -0.55 | 4.56 | H | B | 0.85 | -0.52 | 4.47 | H | B | 0.87 | -0.52 | 4.77 |
| 702 | H | B | 0.88 | -0.52 | 3.40 | H | B | 0.88 | -0.56 | 3.43 | H | B | 0.89 | -0.56 | 3.93 | H | B | 0.89 | -0.55 | 3.29 | H | B | 0.87 | -0.51 | 4.39 | H | B | 0.88 | -0.53 | 4.51 | H | B | 0.87 | -0.52 | 4.44 | H | B | 0.90 | -0.50 | 4.75 |
| 703 | H | E | 0.88 | -0.46 | 3.39 | H | E | 0.88 | -0.51 | 3.39 | H | E | 0.89 | -0.53 | 3.86 | H | E | 0.89 | -0.51 | 3.31 | H | E | 0.87 | -0.47 | 4.36 | H | E | 0.88 | -0.51 | 4.47 | H | E | 0.87 | -0.50 | 4.43 | H | E | 0.90 | -0.47 | 4.71 |
| 704 | H | B | 0.89 | -0.51 | 3.31 | H | B | 0.88 | -0.56 | 3.31 | H | B | 0.89 | -0.61 | 3.77 | H | B | 0.89 | -0.56 | 3.26 | H | B | 0.87 | -0.52 | 4.31 | H | B | 0.88 | -0.58 | 4.44 | H | B | 0.87 | -0.56 | 4.39 | H | B | 0.90 | -0.52 | 4.63 |
| 705 | H | B | 0.89 | -0.69 | 3.28 | H | B | 0.88 | -0.72 | 3.32 | H | B | 0.89 | -0.76 | 3.77 | H | B | 0.89 | -0.72 | 3.20 | H | B | 0.87 | -0.70 | 4.30 | H | B | 0.88 | -0.75 | 4.43 | H | B | 0.87 | -0.72 | 4.38 | H | B | 0.90 | -0.72 | 4.63 |
| 706 | H | B | 0.89 | -0.74 | 3.27 | H | B | 0.88 | -0.76 | 3.32 | H | B | 0.89 | -0.78 | 3.74 | H | B | 0.89 | -0.77 | 3.21 | H | B | 0.87 | -0.74 | 4.29 | H | B | 0.88 | -0.80 | 4.41 | H | B | 0.87 | -0.74 | 4.38 | H | B | 0.90 | -0.76 | 4.64 |
| 707 | H | E | 0.89 | -0.65 | 3.24 | H | E | 0.88 | -0.63 | 3.26 | H | E | 0.89 | -0.69 | 3.67 | H | E | 0.89 | -0.69 | 3.21 | H | E | 0.87 | -0.64 | 4.25 | H | E | 0.88 | -0.71 | 4.38 | H | E | 0.87 | -0.65 | 4.36 | H | E | 0.90 | -0.66 | 4.58 |
| 708 | H | B | 0.89 | -0.79 | 3.18 | H | B | 0.88 | -0.77 | 3.21 | H | B | 0.88 | -0.82 | 3.63 | H | B | 0.89 | -0.81 | 3.14 | H | B | 0.85 | -0.78 | 4.23 | H | B | 0.88 | -0.82 | 4.36 | H | B | 0.86 | -0.77 | 4.34 | H | B | 0.89 | -0.80 | 4.53 |
| 709 | H | B | 0.89 | -0.80 | 3.16 | H | B | 0.88 | -0.76 | 3.23 | H | B | 0.88 | -0.82 | 3.62 | H | B | 0.89 | -0.79 | 3.12 | H | B | 0.85 | -0.79 | 4.22 | H | B | 0.88 | -0.81 | 4.36 | H | B | 0.86 | -0.78 | 4.33 | H | B | 0.89 | -0.78 | 4.55 |
| 710 | H | B | 0.89 | -0.69 | 3.17 | H | B | 0.88 | -0.69 | 3.20 | H | B | 0.89 | -0.75 | 3.55 | H | B | 0.89 | -0.73 | 3.14 | H | B | 0.87 | -0.69 | 4.19 | H | B | 0.88 | -0.74 | 4.32 | H | B | 0.87 | -0.70 | 4.32 | H | B | 0.90 | -0.72 | 4.51 |
| 711 | H | E | 0.89 | -0.56 | 3.12 | H | E | 0.88 | -0.58 | 3.13 | H | E | 0.89 | -0.63 | 3.47 | H | E | 0.89 | -0.63 | 3.11 | H | E | 0.87 | -0.56 | 4.13 | H | E | 0.88 | -0.59 | 4.28 | H | E | 0.87 | -0.56 | 4.30 | H | E | 0.90 | -0.57 | 4.44 |
| 712 | H | B | 0.89 | -0.61 | 3.08 | H | B | 0.88 | -0.65 | 3.12 | H | B | 0.89 | -0.67 | 3.47 | H | B | 0.89 | -0.65 | 3.04 | H | B | 0.87 | -0.63 | 4.11 | H | B | 0.88 | -0.68 | 4.28 | H | B | 0.87 | -0.68 | 4.27 | H | B | 0.90 | -0.67 | 4.43 |
| 713 | H | B | 0.89 | -0.57 | 3.09 | H | B | 0.88 | -0.59 | 3.13 | H | B | 0.89 | -0.60 | 3.45 | H | B | 0.89 | -0.57 | 3.05 | H | B | 0.87 | -0.56 | 4.12 | H | B | 0.88 | -0.59 | 4.26 | H | B | 0.87 | -0.60 | 4.27 | H | B | 0.90 | -0.57 | 4.44 |
| 714 | H | E | 0.88 | -0.26 | 3.09 | H | E | 0.88 | -0.28 | 3.08 | H | E | 0.89 | -0.30 | 3.38 | H | E | 0.89 | -0.29 | 3.06 | H | E | 0.87 | -0.26 | 4.09 | H | E | 0.88 | -0.29 | 4.23 | H | E | 0.86 | -0.29 | 4.27 | H | E | 0.90 | -0.28 | 4.39 |
| 715 | H | E | 0.88 | -0.22 | 3.05 | H | E | 0.88 | -0.23 | 3.03 | H | E | 0.88 | -0.29 | 3.34 | H | E | 0.89 | -0.25 | 3.00 | H | E | 0.85 | -0.22 | 4.06 | H | E | 0.88 | -0.28 | 4.22 | H | E | 0.86 | -0.29 | 4.24 | H | E | 0.90 | -0.28 | 4.33 |
| 716 | H | B | 0.89 | -0.32 | 3.05 | H | B | 0.88 | -0.37 | 3.07 | H | B | 0.88 | -0.42 | 3.38 | H | B | 0.89 | -0.36 | 2.98 | H | B | 0.85 | -0.35 | 4.08 | H | B | 0.88 | -0.39 | 4.31 | H | B | 0.86 | -0.39 | 4.24 | H | B | 0.90 | -0.38 | 4.38 |
| 717 | H | B | 0.89 | -0.24 | 3.11 | H | B | 0.88 | -0.25 | 3.10 | H | B | 0.88 | -0.29 | 3.38 | H | B | 0.89 | -0.23 | 3.04 | H | B | 0.85 | -0.23 | 4.16 | H | B | 0.87 | -0.23 | 4.30 | H | B | 0.87 | -0.24 | 4.31 | H | B | 0.90 | -0.25 | 4.44 |
| 718 | H | E | 0.88 | -0.09 | 3.14 | H | E | 0.87 | -0.14 | 3.14 | H | E | 0.88 | -0.15 | 3.41 | H | E | 0.88 | -0.11 | 3.05 | H | E | 0.85 | -0.13 | 4.19 | H | E | 0.85 | -0.12 | 4.34 | H | E | 0.85 | -0.13 | 4.33 | H | E | 0.88 | -0.12 | 4.50 |
| 719 | H | E | 0.88 | -0.16 | 3.13 | H | E | 0.83 | -0.20 | 3.20 | H | E | 0.86 | -0.22 | 3.47 | H | E | 0.84 | -0.15 | 3.07 | H | E | 0.84 | -0.17 | 4.19 | H | E | 0.84 | -0.17 | 4.40 | H | E | 0.83 | -0.22 | 4.36 | H | E | 0.87 | -0.21 | 4.54 |
| 720 | H | B | 0.86 | -0.09 | 3.16 | H | B | 0.87 | -0.22 | 3.28 | H | B | 0.85 | -0.17 | 3.57 | H | B | 0.82 | -0.17 | 3.11 | H | B | 0.82 | -0.11 | 4.23 | H | B | 0.82 | -0.13 | 4.47 | H | B | 0.82 | -0.14 | 4.40 | H | B | 0.85 | -0.18 | 4.62 |
| 721 | H | B | 0.87 | -0.18 | 3.14 | H | B | 0.87 | -0.27 | 3.23 | H | B | 0.87 | -0.18 | 3.56 | H | B | 0.87 | -0.17 | 3.11 | H | B | 0.84 | -0.19 | 4.20 | H | B | 0.85 | -0.17 | 4.39 | H | B | 0.83 | -0.15 | 4.32 | H | B | 0.86 | -0.18 | 4.59 |
| 722 | H | E | 0.89 | -0.10 | 3.15 | H | E | 0.88 | -0.15 | 3.28 | H | E | 0.88 | -0.06 | 3.64 | H | E | 0.88 | -0.07 | 3.07 | H | E | 0.86 | -0.09 | 4.18 | H | E | 0.87 | -0.04 | 4.42 | H | E | 0.85 | -0.03 | 4.32 | H | E | 0.89 | -0.05 | 4.61 |
| 723 | H | E | 0.88 | -0.27 | 3.14 | H | B | 0.88 | -0.28 | 3.27 | H | E | 0.88 | -0.25 | 3.64 | H | B | 0.88 | -0.26 | 3.05 | H | B | 0.85 | -0.26 | 4.17 | H | E | 0.87 | -0.23 | 4.40 | H | E | 0.84 | -0.22 | 4.33 | H | E | 0.89 | -0.20 | 4.58 |
| 724 | H | B | 0.88 | -0.45 | 3.16 | H | B | 0.87 | -0.47 | 3.29 | H | B | 0.87 | -0.46 | 3.67 | H | B | 0.88 | -0.48 | 3.08 | H | B | 0.84 | -0.44 | 4.23 | H | B | 0.87 | -0.48 | 4.40 | H | B | 0.85 | -0.43 | 4.34 | H | B | 0.89 | -0.41 | 4.60 |
| 725 | H | B | 0.87 | -0.35 | 3.22 | H | E | 0.86 | -0.32 | 3.36 | H | B | 0.86 | -0.33 | 3.75 | H | E | 0.88 | -0.33 | 3.13 | H | B | 0.83 | -0.31 | 4.29 | H | B | 0.86 | -0.35 | 4.47 | H | E | 0.85 | -0.29 | 4.44 | H | E | 0.88 | -0.32 | 4.68 |
| 726 | H | E | 0.87 | -0.20 | 3.28 | H | E | 0.87 | -0.16 | 3.42 | H | E | 0.85 | -0.20 | 3.86 | H | E | 0.88 | -0.11 | 3.17 | H | E | 0.84 | -0.19 | 4.32 | H | E | 0.86 | -0.22 | 4.53 | H | E | 0.85 | -0.17 | 4.48 | H | E | 0.88 | -0.24 | 4.75 |
| 727 | H | B | 0.87 | -0.48 | 3.28 | H | B | 0.88 | -0.45 | 3.39 | H | B | 0.87 | -0.49 | 3.82 | H | B | 0.88 | -0.43 | 3.18 | H | B | 0.85 | -0.50 | 4.32 | H | B | 0.86 | -0.50 | 4.50 | H | B | 0.85 | -0.43 | 4.40 | H | B | 0.88 | -0.51 | 4.72 |
| 728 | H | B | 0.89 | -0.54 | 3.28 | H | B | 0.88 | -0.52 | 3.41 | H | B | 0.88 | -0.55 | 3.81 | H | B | 0.89 | -0.50 | 3.20 | H | B | 0.86 | -0.56 | 4.34 | H | B | 0.88 | -0.56 | 4.48 | H | B | 0.86 | -0.51 | 4.39 | H | B | 0.90 | -0.55 | 4.73 |
| 729 | H | E | 0.89 | -0.35 | 3.35 | H | E | 0.88 | -0.37 | 3.49 | H | E | 0.88 | -0.35 | 3.92 | H | E | 0.89 | -0.32 | 3.26 | H | E | 0.86 | -0.35 | 4.40 | H | E | 0.88 | -0.35 | 4.55 | H | E | 0.86 | -0.29 | 4.43 | H | E | 0.90 | -0.36 | 4.82 |
| 730 | H | E | 0.89 | -0.36 | 3.39 | H | B | 0.88 | -0.38 | 3.51 | H | E | 0.88 | -0.33 | 3.96 | H | B | 0.89 | -0.35 | 3.28 | H | E | 0.86 | -0.33 | 4.42 | H | E | 0.88 | -0.30 | 4.56 | H | B | 0.86 | -0.30 | 4.45 | H | B | 0.90 | -0.38 | 4.84 |
| 731 | H | B | 0.89 | -0.48 | 3.35 | H | B | 0.88 | -0.47 | 3.45 | H | B | 0.88 | -0.48 | 3.87 | H | B | 0.89 | -0.44 | 3.27 | H | B | 0.86 | -0.46 | 4.39 | H | B | 0.88 | -0.47 | 4.51 | H | B | 0.86 | -0.42 | 4.43 | H | B | 0.90 | -0.48 | 4.78 |
| 732 | H | B | 0.87 | -0.47 | 3.41 | H | B | 0.87 | -0.44 | 3.51 | H | B | 0.87 | -0.44 | 3.90 | H | B | 0.88 | -0.43 | 3.32 | H | B | 0.84 | -0.42 | 4.47 | H | B | 0.86 | -0.44 | 4.55 | H | B | 0.85 | -0.42 | 4.47 | H | B | 0.88 | -0.47 | 4.84 |
| 733 | H | E | 0.87 | -0.27 | 3.49 | H | E | 0.87 | -0.27 | 3.59 | H | E | 0.87 | -0.22 | 4.02 | H | E | 0.88 | -0.28 | 3.38 | H | E | 0.84 | -0.25 | 4.53 | H | E | 0.86 | -0.25 | 4.62 | H | E | 0.85 | -0.20 | 4.52 | H | E | 0.88 | -0.29 | 4.93 |
| 734 | H | B | 0.85 | -0.22 | 3.50 | H | B | 0.87 | -0.17 | 3.56 | H | B | 0.86 | -0.22 | 4.01 | H | B | 0.88 | -0.19 | 3.37 | H | B | 0.84 | -0.23 | 4.51 | H | B | 0.85 | -0.25 | 4.62 | H | B | 0.83 | -0.18 | 4.53 | H | B | 0.87 | -0.16 | 4.92 |
| 735 | H | B | 0.85 | -0.30 | 3.49 | H | B | 0.88 | -0.22 | 3.53 | H | B | 0.87 | -0.30 | 3.95 | H | B | 0.89 | -0.24 | 3.38 | H | B | 0.85 | -0.31 | 4.49 | H | B | 0.85 | -0.31 | 4.58 | H | B | 0.83 | -0.23 | 4.52 | H | B | 0.88 | -0.24 | 4.88 |
| 736 | H | E | 0.87 | -0.04 | 3.56 | H | E | 0.88 | 0.01  | 3.61 | H | E | 0.87 | -0.04 | 4.05 | H | E | 0.89 | -0.06 | 3.45 | H | E | 0.84 | -0.05 | 4.57 | H | E | 0.86 | -0.02 | 4.63 | H | E | 0.83 | 0.02  | 4.57 | H | E | 0.88 | -0.00 | 4.96 |
| 737 | H | E | 0.86 | 0.08  | 3.67 | H | E | 0.88 | 0.10  | 3.71 | H | E | 0.86 | 0.04  | 4.18 | H | E | 0.88 | 0.09  | 3.50 | H | E | 0.84 | 0.05  | 4.60 | H | E | 0.85 | 0.03  | 4.75 | H | E | 0.82 | 0.11  | 4.68 | H | E | 0.88 | 0.09  | 5.09 |
| 738 | H | B | 0.86 | -0.10 | 3.65 | H | B | 0.87 | 0.05  | 3.67 | H | B | 0.85 | -0.08 | 4.15 | H | B | 0.88 | -0.04 | 3.55 | H | B | 0.83 | -0.07 | 4.65 | H | B | 0.85 | -0.08 | 4.73 | H | B | 0.80 | -0.03 | 4.71 | H | B | 0.87 | -0.09 | 5.05 |
| 739 | H | B | 0.83 | -0.17 | 3.73 | H | B | 0.82 | -0.06 | 3.72 | H | B | 0.82 | -0.19 | 4.21 | H | B | 0.82 | -0.10 | 3.65 | H | B | 0.81 | -0.14 | 4.70 | H | B | 0.82 | -0.19 | 4.77 | H | B | 0.78 | -0.10 | 4.75 | H | B | 0.85 | -0.17 |      |

|     |   |   |      |       |      |   |   |      |       |      |   |   |      |       |      |   |   |      |       |      |   |   |      |       |      |   |   |      |       |      |   |   |      |       |      |   |   |      |       |      |
|-----|---|---|------|-------|------|---|---|------|-------|------|---|---|------|-------|------|---|---|------|-------|------|---|---|------|-------|------|---|---|------|-------|------|---|---|------|-------|------|---|---|------|-------|------|
| 754 | H | B | 0.88 | -0.66 | 3.23 | H | B | 0.88 | -0.66 | 3.27 | H | B | 0.87 | -0.65 | 3.57 | H | B | 0.89 | -0.68 | 3.15 | H | B | 0.85 | -0.65 | 4.29 | H | B | 0.87 | -0.66 | 4.36 | H | B | 0.85 | -0.58 | 4.36 | H | B | 0.89 | -0.66 | 4.59 |
| 755 | H | E | 0.88 | -0.51 | 3.18 | H | B | 0.88 | -0.54 | 3.20 | H | B | 0.85 | -0.55 | 3.47 | H | E | 0.88 | -0.49 | 3.10 | H | E | 0.84 | -0.49 | 4.22 | H | E | 0.86 | -0.54 | 4.31 | H | E | 0.82 | -0.39 | 4.35 | H | E | 0.88 | -0.50 | 4.51 |
| 756 | H | B | 0.88 | -0.42 | 3.17 | H | B | 0.87 | -0.47 | 3.22 | H | B | 0.85 | -0.45 | 3.53 | H | B | 0.88 | -0.39 | 3.10 | H | B | 0.84 | -0.35 | 4.26 | H | B | 0.85 | -0.44 | 4.37 | H | E | 0.82 | -0.30 | 4.36 | H | E | 0.88 | -0.41 | 4.56 |
| 757 | H | B | 0.87 | -0.35 | 3.28 | H | B | 0.86 | -0.44 | 3.33 | H | B | 0.85 | -0.37 | 3.66 | H | B | 0.87 | -0.35 | 3.20 | H | B | 0.82 | -0.33 | 4.41 | H | B | 0.86 | -0.37 | 4.49 | H | B | 0.82 | -0.27 | 4.47 | H | B | 0.87 | -0.38 | 4.72 |
| 758 | H | E | 0.87 | -0.12 | 3.32 | H | E | 0.88 | -0.17 | 3.34 | H | E | 0.85 | -0.11 | 3.68 | H | E | 0.88 | -0.09 | 3.21 | H | E | 0.83 | -0.15 | 4.44 | H | E | 0.85 | -0.20 | 4.55 | H | E | 0.83 | -0.07 | 4.46 | H | E | 0.87 | -0.16 | 4.76 |
| 759 | H | E | 0.88 | -0.05 | 3.29 | H | E | 0.87 | -0.13 | 3.30 | H | E | 0.85 | -0.01 | 3.59 | H | E | 0.89 | -0.03 | 3.16 | H | E | 0.83 | -0.07 | 4.36 | H | E | 0.87 | -0.06 | 4.44 | H | E | 0.84 | 0.04  | 4.37 | H | E | 0.88 | -0.02 | 4.67 |
| 760 | H | E | 0.88 | -0.06 | 3.33 | H | E | 0.88 | -0.16 | 3.36 | H | E | 0.88 | -0.03 | 3.66 | H | E | 0.89 | -0.05 | 3.20 | H | E | 0.83 | -0.11 | 4.41 | H | E | 0.85 | -0.07 | 4.52 | H | E | 0.86 | -0.02 | 4.36 | H | E | 0.89 | -0.05 | 4.72 |
| 761 | H | B | 0.85 | -0.40 | 3.33 | H | B | 0.88 | -0.41 | 3.39 | H | B | 0.85 | -0.37 | 3.73 | H | B | 0.88 | -0.42 | 3.23 | H | B | 0.82 | -0.44 | 4.44 | H | B | 0.86 | -0.33 | 4.51 | H | B | 0.85 | -0.32 | 4.39 | H | B | 0.86 | -0.36 | 4.78 |
| 762 | H | B | 0.86 | -0.29 | 3.31 | H | B | 0.88 | -0.24 | 3.34 | H | B | 0.86 | -0.20 | 3.66 | H | B | 0.88 | -0.18 | 3.21 | H | B | 0.85 | -0.26 | 4.36 | H | B | 0.83 | -0.16 | 4.51 | H | B | 0.85 | -0.14 | 4.38 | H | B | 0.86 | -0.18 | 4.74 |
| 763 | H | E | 0.87 | -0.19 | 3.36 | H | E | 0.89 | -0.17 | 3.37 | H | E | 0.87 | -0.10 | 3.67 | H | E | 0.88 | -0.10 | 3.25 | H | E | 0.85 | -0.16 | 4.42 | H | E | 0.86 | -0.01 | 4.51 | H | E | 0.85 | -0.04 | 4.41 | H | E | 0.87 | -0.08 | 4.78 |
| 764 | H | E | 0.86 | -0.33 | 3.41 | H | E | 0.87 | -0.26 | 3.47 | H | E | 0.87 | -0.22 | 3.78 | H | E | 0.89 | -0.27 | 3.30 | H | E | 0.85 | -0.25 | 4.48 | H | E | 0.85 | -0.19 | 4.58 | H | E | 0.85 | -0.19 | 4.44 | H | E | 0.86 | -0.22 | 4.86 |
| 765 | H | B | 0.86 | -0.50 | 3.38 | H | B | 0.88 | -0.41 | 3.44 | H | B | 0.86 | -0.43 | 3.78 | H | B | 0.88 | -0.48 | 3.29 | H | B | 0.83 | -0.46 | 4.47 | H | B | 0.85 | -0.41 | 4.54 | H | B | 0.85 | -0.46 | 4.44 | H | B | 0.87 | -0.45 | 4.82 |
| 766 | H | B | 0.87 | -0.39 | 3.36 | H | B | 0.88 | -0.36 | 3.39 | H | B | 0.86 | -0.35 | 3.70 | H | B | 0.88 | -0.36 | 3.27 | H | B | 0.84 | -0.35 | 4.42 | H | B | 0.84 | -0.36 | 4.51 | H | B | 0.83 | -0.37 | 4.44 | H | B | 0.86 | -0.38 | 4.77 |
| 767 | H | E | 0.88 | -0.01 | 3.43 | H | E | 0.88 | 0.05  | 3.46 | H | E | 0.88 | -0.00 | 3.74 | H | E | 0.89 | 0.05  | 3.34 | H | E | 0.85 | 0.04  | 4.46 | H | E | 0.86 | -0.05 | 4.53 | H | E | 0.86 | 0.03  | 4.43 | H | E | 0.88 | -0.06 | 4.80 |
| 768 | H | E | 0.88 | 0.06  | 3.45 | H | E | 0.88 | 0.06  | 3.50 | H | E | 0.88 | 0.03  | 3.83 | H | E | 0.89 | 0.09  | 3.37 | H | E | 0.85 | 0.12  | 4.49 | H | E | 0.87 | 0.00  | 4.55 | H | E | 0.85 | 0.13  | 4.46 | H | E | 0.88 | 0.04  | 4.86 |
| 769 | H | B | 0.88 | -0.36 | 3.42 | H | B | 0.88 | -0.38 | 3.45 | H | B | 0.87 | -0.42 | 3.78 | H | B | 0.88 | -0.33 | 3.36 | H | B | 0.85 | -0.33 | 4.45 | H | B | 0.86 | -0.39 | 4.51 | H | B | 0.85 | -0.32 | 4.45 | H | B | 0.88 | -0.38 | 4.81 |
| 770 | H | B | 0.87 | -0.37 | 3.46 | H | B | 0.88 | -0.40 | 3.45 | H | B | 0.87 | -0.42 | 3.74 | H | B | 0.88 | -0.29 | 3.39 | H | B | 0.85 | -0.34 | 4.45 | H | B | 0.85 | -0.37 | 4.51 | H | B | 0.85 | -0.31 | 4.47 | H | B | 0.86 | -0.38 | 4.81 |
| 771 | H | E | 0.87 | -0.21 | 3.54 | H | E | 0.88 | -0.23 | 3.54 | H | E | 0.86 | -0.26 | 3.86 | H | E | 0.88 | -0.19 | 3.46 | H | E | 0.85 | -0.20 | 4.52 | H | E | 0.85 | -0.21 | 4.58 | H | E | 0.85 | -0.17 | 4.51 | H | E | 0.86 | -0.22 | 4.91 |
| 772 | H | B | 0.85 | -0.38 | 3.55 | H | B | 0.87 | -0.43 | 3.55 | H | B | 0.85 | -0.43 | 3.91 | H | B | 0.88 | -0.42 | 3.47 | H | E | 0.83 | -0.37 | 4.53 | H | E | 0.84 | -0.39 | 4.60 | H | E | 0.83 | -0.33 | 4.54 | H | E | 0.85 | -0.38 | 4.92 |
| 773 | H | B | 0.87 | -0.56 | 3.50 | H | B | 0.88 | -0.57 | 3.47 | H | B | 0.86 | -0.58 | 3.80 | H | B | 0.88 | -0.59 | 3.43 | H | B | 0.85 | -0.56 | 4.44 | H | B | 0.85 | -0.53 | 4.52 | H | B | 0.85 | -0.54 | 4.49 | H | B | 0.86 | -0.58 | 4.83 |
| 774 | H | B | 0.86 | -0.55 | 3.59 | H | B | 0.87 | -0.51 | 3.53 | H | B | 0.85 | -0.54 | 3.86 | H | B | 0.88 | -0.55 | 3.51 | H | B | 0.85 | -0.56 | 4.50 | H | B | 0.85 | -0.53 | 4.57 | H | B | 0.84 | -0.59 | 4.54 | H | B | 0.86 | -0.59 | 4.88 |
| 775 | H | E | 0.86 | -0.36 | 3.65 | H | E | 0.88 | -0.30 | 3.59 | H | E | 0.86 | -0.34 | 3.95 | H | E | 0.89 | -0.31 | 3.55 | H | E | 0.85 | -0.36 | 4.54 | H | E | 0.84 | -0.33 | 4.64 | H | E | 0.84 | -0.38 | 4.57 | H | E | 0.86 | -0.41 | 4.96 |
| 776 | H | E | 0.86 | -0.32 | 3.61 | H | B | 0.88 | -0.24 | 3.53 | H | E | 0.86 | -0.30 | 3.96 | H | E | 0.89 | -0.29 | 3.52 | H | E | 0.85 | -0.27 | 4.57 | H | E | 0.84 | -0.29 | 4.60 | H | E | 0.84 | -0.32 | 4.56 | H | E | 0.86 | -0.34 | 4.90 |
| 777 | H | B | 0.86 | -0.34 | 3.62 | H | B | 0.88 | -0.26 | 3.50 | H | B | 0.86 | -0.34 | 3.90 | H | B | 0.89 | -0.36 | 3.53 | H | B | 0.85 | -0.30 | 4.54 | H | B | 0.85 | -0.37 | 4.56 | H | B | 0.84 | -0.37 | 4.56 | H | B | 0.86 | -0.41 | 4.87 |
| 778 | H | E | 0.86 | -0.08 | 3.76 | H | E | 0.88 | -0.10 | 3.62 | H | E | 0.86 | -0.08 | 4.01 | H | E | 0.89 | -0.18 | 3.66 | H | E | 0.85 | -0.09 | 4.61 | H | E | 0.85 | -0.10 | 4.70 | H | E | 0.83 | -0.15 | 4.70 | H | E | 0.86 | -0.15 | 5.02 |
| 779 | C | E | 0.86 | 0.05  | 3.73 | C | E | 0.88 | 0.03  | 3.59 | C | E | 0.86 | 0.00  | 4.01 | C | E | 0.88 | -0.08 | 3.64 | C | E | 0.85 | 0.02  | 4.57 | H | E | 0.85 | -0.03 | 4.73 | C | E | 0.83 | -0.03 | 4.65 | H | E | 0.85 | -0.07 | 5.05 |
| 780 | C | E | 0.82 | 0.13  | 3.80 | C | E | 0.84 | 0.16  | 3.61 | C | E | 0.83 | 0.06  | 4.05 | C | E | 0.84 | 0.04  | 3.71 | C | E | 0.82 | 0.08  | 4.60 | H | E | 0.81 | 0.06  | 4.78 | C | E | 0.79 | 0.07  | 4.72 | H | E | 0.82 | 0.08  | 5.11 |
| 781 | C | E | 0.82 | 0.15  | 3.73 | C | E | 0.84 | 0.13  | 3.56 | C | E | 0.82 | 0.04  | 4.01 | C | E | 0.85 | 0.02  | 3.65 | C | E | 0.82 | 0.09  | 4.58 | H | E | 0.80 | 0.09  | 4.77 | C | E | 0.79 | 0.17  | 4.70 | H | E | 0.82 | 0.09  | 5.06 |
| 782 | H | E | 0.84 | 0.08  | 3.62 | H | E | 0.83 | 0.14  | 3.44 | H | E | 0.82 | 0.02  | 3.86 | H | E | 0.84 | 0.02  | 3.57 | H | E | 0.80 | 0.08  | 4.48 | H | E | 0.82 | 0.00  | 4.57 | H | E | 0.80 | 0.15  | 4.61 | H | E | 0.83 | 0.04  | 4.83 |
| 783 | H | E | 0.82 | -0.07 | 3.54 | H | E | 0.82 | 0.04  | 3.40 | H | E | 0.81 | -0.09 | 3.83 | H | E | 0.82 | -0.11 | 3.52 | H | E | 0.78 | -0.07 | 4.46 | H | E | 0.82 | -0.09 | 4.54 | H | E | 0.79 | 0.04  | 4.58 | H | E | 0.82 | -0.08 | 4.79 |
| 784 | H | B | 0.85 | -0.41 | 3.53 | H | B | 0.87 | -0.35 | 3.41 | H | B | 0.85 | -0.41 | 3.82 | H | B | 0.86 | -0.43 | 3.49 | H | B | 0.84 | -0.41 | 4.41 | H | B | 0.86 | -0.43 | 4.49 | H | B | 0.82 | -0.39 | 4.54 | H | B | 0.86 | -0.44 | 4.77 |
| 785 | H | B | 0.85 | -0.52 | 3.53 | H | B | 0.88 | -0.50 | 3.38 | H | B | 0.85 | -0.52 | 3.75 | H | B | 0.87 | -0.53 | 3.48 | H | B | 0.85 | -0.53 | 4.37 | H | B | 0.86 | -0.56 | 4.46 | H | B | 0.82 | -0.54 | 4.53 | H | B | 0.86 | -0.56 | 4.74 |
| 786 | H | E | 0.85 | -0.50 | 3.45 | H | E | 0.88 | -0.46 | 3.29 | H | E | 0.85 | -0.52 | 3.65 | H | E | 0.87 | -0.53 | 3.41 | H | E | 0.85 | -0.52 | 4.30 | H | E | 0.86 | -0.57 | 4.40 | H | E | 0.82 | -0.55 | 4.49 | H | E | 0.86 | -0.56 | 4.65 |
| 787 | H | B | 0.85 | -0.58 | 3.40 | H | B | 0.87 | -0.53 | 3.31 | H | B | 0.85 | -0.60 | 3.66 | H | B | 0.86 | -0.59 | 3.38 | H | B | 0.85 | -0.58 | 4.31 | H | B | 0.86 | -0.63 | 4.40 | H | B | 0.82 | -0.59 | 4.48 | H | B | 0.86 | -0.65 | 4.66 |
| 788 | H | B | 0.85 | -0.77 | 3.45 | H | B | 0.86 | -0.74 | 3.37 | H | B | 0.85 | -0.80 | 3.70 | H | B | 0.85 | -0.77 | 3.41 | H | B | 0.85 | -0.77 | 4.35 | H | B | 0.86 | -0.80 | 4.43 | H | B | 0.82 | -0.78 | 4.49 | H | B | 0.86 | -0.82 | 4.71 |
| 789 | H | B | 0.85 | -0.71 | 3.44 | H | B | 0.86 | -0.65 | 3.32 | H | B | 0.86 | -0.70 | 3.60 | H | B | 0.85 | -0.69 | 3.39 | H | B | 0.85 | -0.67 | 4.31 | H | B | 0.86 | -0.71 | 4.39 | H | B | 0.83 | -0.68 | 4.47 | H | B | 0.85 | -0.71 | 4.67 |
| 790 | H | E | 0.85 | -0.51 | 3.35 | H | E | 0.87 | -0.51 | 3.24 | H | E | 0.86 | -0.57 | 3.52 | H | E | 0.86 | -0.57 | 3.30 | H | E | 0.85 | -0.50 | 4.25 | H | E | 0.86 | -0.58 | 4.34 | H | E | 0.84 | -0.53 | 4.42 | H | E | 0.85 | -0.55 | 4.59 |
| 791 | H | B | 0.85 | -0.67 | 3.35 | H | B | 0.87 | -0.73 | 3.29 | H | B | 0.86 | -0.71 | 3.58 | H | B | 0.86 | -0.74 | 3.30 | H | B | 0.85 | -0.69 | 4.29 | H | B | 0.86 | -0.78 | 4.37 | H | B | 0.84 | -0.73 | 4.42 | H | B | 0.85 | -0.75 | 4.64 |
| 792 | H | B | 0.85 | -0.67 | 3.40 | H | B | 0.87 | -0.71 | 3.31 | H | B | 0.87 | -0.71 | 3.56 | H | B | 0.87 | -0.74 | 3.32 | H | B | 0.85 | -0.69 | 4.31 | H | B | 0.86 | -0.75 | 4.38 | H | B | 0.84 | -0.70 | 4.43 | H | B | 0.85 | -0.75 | 4.66 |
| 793 | H | E | 0.85 | -0.43 | 3.35 | H | E | 0.88 | -0.53 | 3.22 | H | E | 0.87 | -0.49 | 3.45 | H | E | 0.87 | -0.52 | 3.25 | H | E | 0.85 | -0.48 | 4.25 | H | E | 0.87 | -0.50 | 4.31 | H | E | 0.84 | -0.45 | 4.40 | H | E | 0.86 | -0.52 |      |

|     |   |   |      |       |      |   |   |      |       |      |   |   |      |       |      |   |   |      |       |      |   |   |      |       |      |   |   |      |       |      |   |   |      |       |      |   |   |      |         |      |
|-----|---|---|------|-------|------|---|---|------|-------|------|---|---|------|-------|------|---|---|------|-------|------|---|---|------|-------|------|---|---|------|-------|------|---|---|------|-------|------|---|---|------|---------|------|
| 808 | H | E | 0.82 | -0.37 | 3.71 | H | E | 0.86 | -0.31 | 3.54 | H | E | 0.84 | -0.30 | 3.74 | H | E | 0.88 | -0.32 | 3.51 | H | E | 0.84 | -0.33 | 4.55 | H | E | 0.82 | -0.24 | 4.64 | H | E | 0.80 | -0.31 | 4.60 | H | E | 0.85 | -0.26   | 4.88 |
| 809 | H | E | 0.84 | -0.38 | 3.67 | H | E | 0.87 | -0.33 | 3.55 | H | E | 0.84 | -0.34 | 3.80 | H | E | 0.90 | -0.36 | 3.50 | H | E | 0.83 | -0.38 | 4.56 | H | E | 0.85 | -0.21 | 4.60 | H | E | 0.83 | -0.31 | 4.56 | H | E | 0.87 | -0.27   | 4.87 |
| 810 | H | B | 0.83 | -0.50 | 3.63 | H | B | 0.87 | -0.47 | 3.49 | H | B | 0.84 | -0.47 | 3.74 | H | B | 0.90 | -0.46 | 3.46 | H | B | 0.84 | -0.46 | 4.50 | H | B | 0.83 | -0.39 | 4.57 | H | B | 0.82 | -0.45 | 4.57 | H | B | 0.87 | -0.46   | 4.81 |
| 811 | H | B | 0.83 | -0.62 | 3.67 | H | B | 0.86 | -0.61 | 3.48 | H | B | 0.84 | -0.64 | 3.70 | H | B | 0.89 | -0.63 | 3.48 | H | B | 0.82 | -0.62 | 4.52 | H | B | 0.83 | -0.57 | 4.56 | H | B | 0.82 | -0.60 | 4.58 | H | B | 0.86 | -0.64   | 4.79 |
| 812 | H | B | 0.82 | -0.55 | 3.77 | H | E | 0.87 | -0.43 | 3.54 | H | B | 0.83 | -0.56 | 3.80 | H | B | 0.88 | -0.56 | 3.58 | H | E | 0.82 | -0.51 | 4.57 | H | E | 0.83 | -0.49 | 4.61 | H | E | 0.81 | -0.50 | 4.62 | H | E | 0.85 | -0.52   | 4.89 |
| 813 | H | B | 0.82 | -0.40 | 3.74 | H | B | 0.88 | -0.37 | 3.53 | H | B | 0.82 | -0.48 | 3.85 | H | B | 0.88 | -0.46 | 3.57 | H | B | 0.82 | -0.44 | 4.56 | H | B | 0.82 | -0.43 | 4.61 | H | B | 0.81 | -0.39 | 4.62 | H | B | 0.85 | -0.41   | 4.90 |
| 814 | H | B | 0.80 | -0.69 | 3.69 | H | B | 0.87 | -0.59 | 3.45 | H | B | 0.82 | -0.70 | 3.75 | H | B | 0.88 | -0.69 | 3.50 | H | B | 0.82 | -0.64 | 4.49 | H | B | 0.82 | -0.66 | 4.54 | H | B | 0.79 | -0.61 | 4.60 | H | B | 0.83 | -0.64   | 4.83 |
| 815 | H | B | 0.81 | -0.70 | 3.74 | H | B | 0.87 | -0.58 | 3.46 | H | B | 0.82 | -0.68 | 3.75 | H | B | 0.88 | -0.69 | 3.53 | H | B | 0.83 | -0.66 | 4.47 | H | B | 0.81 | -0.69 | 4.57 | H | B | 0.81 | -0.61 | 4.60 | H | B | 0.84 | -0.68   | 4.81 |
| 816 | H | E | 0.82 | -0.47 | 3.79 | H | E | 0.88 | -0.39 | 3.53 | H | E | 0.84 | -0.40 | 3.85 | H | E | 0.90 | -0.45 | 3.60 | H | E | 0.84 | -0.43 | 4.51 | H | E | 0.84 | -0.45 | 4.59 | H | E | 0.80 | -0.37 | 4.65 | H | E | 0.87 | -0.43   | 4.86 |
| 817 | H | E | 0.83 | -0.52 | 3.76 | H | E | 0.88 | -0.46 | 3.51 | H | E | 0.82 | -0.39 | 3.90 | H | E | 0.89 | -0.48 | 3.60 | H | E | 0.82 | -0.45 | 4.53 | H | E | 0.83 | -0.46 | 4.59 | H | E | 0.79 | -0.33 | 4.65 | H | E | 0.86 | -0.41   | 4.87 |
| 818 | H | B | 0.83 | -0.53 | 3.68 | H | B | 0.88 | -0.51 | 3.42 | H | B | 0.81 | -0.42 | 3.80 | H | B | 0.88 | -0.48 | 3.54 | H | B | 0.80 | -0.48 | 4.48 | H | B | 0.82 | -0.46 | 4.53 | H | B | 0.78 | -0.36 | 4.63 | H | B | 0.85 | -0.49   | 4.79 |
| 819 | H | B | 0.74 | -0.31 | 3.86 | H | B | 0.80 | -0.39 | 3.54 | H | B | 0.75 | -0.26 | 3.89 | H | B | 0.82 | -0.30 | 3.66 | H | B | 0.75 | -0.34 | 4.64 | H | B | 0.74 | -0.29 | 4.72 | H | B | 0.70 | -0.16 | 4.83 | H | B | 0.76 | -0.30   | 4.98 |
| 820 | H | E | 0.71 | -0.04 | 3.96 | H | E | 0.80 | -0.13 | 3.58 | H | E | 0.74 | -0.01 | 3.99 | H | E | 0.81 | -0.02 | 3.75 | H | E | 0.74 | -0.07 | 4.69 | H | E | 0.73 | 0.02  | 4.77 | H | E | 0.69 | 0.10  | 4.88 | H | E | 0.75 | 0.04    | 5.06 |
| 821 | H | E | 0.68 | 0.08  | 4.00 | H | E | 0.76 | -0.08 | 3.60 | H | E | 0.68 | 0.05  | 4.04 | H | E | 0.78 | 0.03  | 3.80 | H | E | 0.70 | -0.02 | 4.67 | H | E | 0.68 | 0.06  | 4.90 | H | E | 0.65 | 0.19  | 4.89 | H | E | 0.70 | 0.02    | 5.11 |
| 822 | H | E | 0.69 | -0.07 | 3.96 | H | E | 0.76 | -0.22 | 3.60 | H | E | 0.68 | -0.07 | 4.08 | H | E | 0.75 | -0.12 | 3.83 | H | E | 0.70 | -0.06 | 4.68 | H | E | 0.68 | -0.04 | 4.94 | H | E | 0.65 | 0.05  | 4.88 | H | E | 0.69 | -0.11   | 5.15 |
| 823 | H | E | 0.69 | -0.18 | 3.86 | H | E | 0.77 | -0.17 | 3.52 | H | E | 0.72 | -0.01 | 3.92 | H | E | 0.76 | -0.04 | 3.73 | H | E | 0.73 | -0.08 | 4.56 | H | E | 0.68 | -0.06 | 4.87 | H | E | 0.71 | 0.04  | 4.77 | H | E | 0.71 | -0.08   | 5.05 |
| 824 | H | B | 0.72 | -0.25 | 3.83 | H | E | 0.79 | -0.20 | 3.45 | H | E | 0.75 | -0.10 | 3.81 | H | E | 0.79 | -0.11 | 3.67 | H | E | 0.75 | -0.15 | 4.49 | H | E | 0.72 | -0.14 | 4.77 | H | E | 0.72 | -0.00 | 4.76 | H | E | 0.74 | -0.10   | 4.94 |
| 825 | H | E | 0.75 | -0.01 | 3.86 | H | E | 0.81 | -0.15 | 3.44 | H | E | 0.77 | -0.10 | 3.85 | H | E | 0.80 | -0.08 | 3.72 | H | E | 0.76 | -0.07 | 4.51 | H | E | 0.75 | -0.09 | 4.74 | H | E | 0.75 | 0.04  | 4.73 | H | E | 0.75 | -0.01   | 4.95 |
| 826 | H | E | 0.77 | -0.02 | 3.81 | H | E | 0.82 | -0.12 | 3.43 | H | E | 0.76 | -0.11 | 3.85 | H | E | 0.84 | -0.09 | 3.68 | H | E | 0.78 | -0.05 | 4.52 | H | E | 0.77 | -0.06 | 4.71 | H | E | 0.75 | -0.05 | 4.77 | H | E | 0.78 | -0.04   | 4.94 |
| 827 | H | E | 0.77 | -0.00 | 3.65 | H | E | 0.82 | -0.08 | 3.29 | H | E | 0.78 | -0.02 | 3.66 | H | E | 0.83 | -0.05 | 3.55 | H | E | 0.78 | 0.09  | 4.35 | H | E | 0.78 | -0.00 | 4.55 | H | E | 0.76 | -0.05 | 4.61 | H | E | 0.78 | 0.07    | 4.74 |
| 828 | H | E | 0.76 | -0.12 | 3.57 | H | E | 0.82 | -0.24 | 3.26 | H | E | 0.77 | -0.12 | 3.63 | H | E | 0.82 | -0.14 | 3.49 | H | E | 0.77 | 0.00  | 4.33 | H | E | 0.76 | -0.13 | 4.54 | H | E | 0.74 | -0.20 | 4.61 | H | E | 0.76 | -0.04   | 4.73 |
| 829 | H | E | 0.74 | -0.34 | 3.65 | H | B | 0.79 | -0.46 | 3.36 | H | B | 0.75 | -0.32 | 3.72 | H | E | 0.82 | -0.35 | 3.53 | H | B | 0.75 | -0.26 | 4.40 | H | B | 0.75 | -0.36 | 4.58 | H | B | 0.75 | -0.37 | 4.61 | H | B | 0.75 | -0.29   | 4.82 |
| 830 | H | B | 0.77 | -0.58 | 3.64 | H | B | 0.81 | -0.68 | 3.32 | H | B | 0.78 | -0.52 | 3.64 | H | B | 0.82 | -0.58 | 3.53 | H | B | 0.78 | -0.51 | 4.35 | H | B | 0.77 | -0.57 | 4.53 | H | B | 0.77 | -0.53 | 4.58 | H | B | 0.77 | -0.52   | 4.75 |
| 831 | H | E | 0.78 | -0.55 | 3.53 | H | B | 0.82 | -0.62 | 3.23 | H | E | 0.78 | -0.48 | 3.52 | H | B | 0.83 | -0.55 | 3.42 | H | E | 0.79 | -0.45 | 4.27 | H | E | 0.80 | -0.51 | 4.44 | H | E | 0.80 | -0.50 | 4.50 | H | E | 0.79 | -0.52   | 4.64 |
| 832 | H | B | 0.81 | -0.60 | 3.48 | H | B | 0.83 | -0.64 | 3.24 | H | E | 0.82 | -0.53 | 3.53 | H | B | 0.85 | -0.60 | 3.38 | H | E | 0.82 | -0.51 | 4.25 | H | B | 0.80 | -0.58 | 4.45 | H | B | 0.79 | -0.55 | 4.50 | H | B | 0.81 | -0.58   | 4.65 |
| 833 | H | B | 0.81 | -0.81 | 3.56 | H | B | 0.83 | -0.80 | 3.31 | H | B | 0.82 | -0.75 | 3.58 | H | B | 0.85 | -0.78 | 3.44 | H | B | 0.82 | -0.74 | 4.30 | H | B | 0.81 | -0.75 | 4.47 | H | B | 0.78 | -0.72 | 4.54 | H | B | 0.81 | -0.74   | 4.70 |
| 834 | H | B | 0.81 | -0.77 | 3.55 | H | B | 0.83 | -0.77 | 3.26 | H | B | 0.82 | -0.73 | 3.49 | H | B | 0.85 | -0.74 | 3.40 | H | B | 0.82 | -0.75 | 4.28 | H | B | 0.81 | -0.73 | 4.43 | H | B | 0.79 | -0.68 | 4.52 | H | B | 0.81 | -0.73   | 4.64 |
| 835 | H | E | 0.81 | -0.52 | 3.47 | H | E | 0.83 | -0.51 | 3.21 | H | E | 0.82 | -0.47 | 3.44 | H | E | 0.85 | -0.47 | 3.32 | H | E | 0.82 | -0.50 | 4.23 | H | E | 0.81 | -0.53 | 4.40 | H | E | 0.78 | -0.45 | 4.49 | H | E | 0.81 | -0.49   | 4.60 |
| 836 | H | B | 0.81 | -0.71 | 3.50 | H | B | 0.83 | -0.70 | 3.28 | H | B | 0.82 | -0.68 | 3.52 | H | B | 0.86 | -0.63 | 3.35 | H | B | 0.82 | -0.70 | 4.29 | H | B | 0.80 | -0.67 | 4.46 | H | B | 0.78 | -0.62 | 4.51 | H | B | 0.81 | -0.68   | 4.67 |
| 837 | H | B | 0.81 | -0.76 | 3.57 | H | B | 0.83 | -0.76 | 3.32 | H | B | 0.82 | -0.77 | 3.53 | H | B | 0.85 | -0.71 | 3.39 | H | B | 0.82 | -0.76 | 4.33 | H | B | 0.80 | -0.74 | 4.48 | H | B | 0.78 | -0.72 | 4.53 | H | B | 0.81 | -0.75   | 4.70 |
| 838 | H | B | 0.81 | -0.69 | 3.53 | H | B | 0.83 | -0.72 | 3.24 | H | B | 0.81 | -0.73 | 3.43 | H | B | 0.85 | -0.67 | 3.32 | H | B | 0.82 | -0.69 | 4.28 | H | B | 0.81 | -0.70 | 4.42 | H | B | 0.78 | -0.69 | 4.50 | H | B | 0.81 | -0.71   | 4.62 |
| 839 | H | E | 0.81 | -0.58 | 3.48 | H | B | 0.83 | -0.68 | 3.24 | H | B | 0.81 | -0.63 | 3.44 | H | B | 0.85 | -0.62 | 3.28 | H | E | 0.82 | -0.57 | 4.28 | H | B | 0.81 | -0.59 | 4.42 | H | B | 0.78 | -0.64 | 4.47 | H | B | 0.81 | -0.64   | 4.62 |
| 840 | H | B | 0.81 | -0.72 | 3.55 | H | B | 0.83 | -0.73 | 3.32 | H | B | 0.81 | -0.72 | 3.51 | H | B | 0.85 | -0.70 | 3.35 | H | E | 0.82 | -0.73 | 4.35 | H | B | 0.81 | -0.68 | 4.48 | H | B | 0.78 | -0.72 | 4.51 | H | B | 0.81 | -0.73   | 4.70 |
| 841 | H | B | 0.81 | -0.69 | 3.58 | H | B | 0.83 | -0.66 | 3.29 | H | B | 0.81 | -0.72 | 3.45 | H | B | 0.85 | -0.68 | 3.38 | H | B | 0.82 | -0.73 | 4.34 | H | B | 0.81 | -0.69 | 4.47 | H | B | 0.78 | -0.68 | 4.51 | H | B | 0.81 | -0.68   | 4.67 |
| 842 | H | E | 0.80 | -0.42 | 3.53 | H | E | 0.82 | -0.40 | 3.24 | H | E | 0.80 | -0.43 | 3.39 | H | E | 0.83 | -0.39 | 3.32 | H | E | 0.81 | -0.44 | 4.31 | H | E | 0.80 | -0.41 | 4.45 | H | E | 0.77 | -0.40 | 4.49 | H | E | 0.80 | -0.42   | 4.63 |
| 843 | H | E | 0.81 | -0.37 | 3.55 | H | E | 0.82 | -0.35 | 3.31 | H | E | 0.82 | -0.37 | 3.46 | H | E | 0.83 | -0.37 | 3.36 | H | E | 0.82 | -0.38 | 4.37 | H | E | 0.81 | -0.35 | 4.51 | H | E | 0.79 | -0.30 | 4.49 | H | E | 0.81 | -0.34   | 4.70 |
| 844 | C | B | 0.80 | -0.34 | 3.72 | C | B | 0.82 | -0.30 | 3.46 | C | B | 0.80 | -0.32 | 3.61 | C | B | 0.82 | -0.32 | 3.42 | C | B | 0.80 | -0.34 | 4.49 | C | B | 0.82 | -0.27 | 4.60 | C | B | 0.79 | -0.28 | 4.65 | C | B | 0.80 | -0.32   | 4.89 |
| 845 | C | E | 0.79 | -0.10 | 3.72 | C | E | 0.81 | -0.13 | 3.40 | C | E | 0.79 | -0.08 | 3.52 | C | E | 0.80 | -0.10 | 3.43 | C | E | 0.79 | -0.12 | 4.51 | C | E | 0.80 | -0.07 | 4.61 | C | E | 0.78 | -0.10 | 4.61 | C | E | 0.79 | -0.04   | 4.80 |
| 846 | C | B | 0.68 | -0.15 | 3.91 | C | B | 0.70 | -0.06 | 3.54 | C | B | 0.68 | -0.04 | 3.66 | C | B | 0.71 | -0.08 | 3.58 | C | B | 0.68 | -0.14 | 4.74 | C | B | 0.69 | -0.10 | 4.82 | C | B | 0.70 | -0.10 | 4.80 | C | B | 0.68 | -0.10   | 5.01 |
| 847 | H | E | 0.77 | -0.12 | 3.83 | H | E | 0.73 | -0.05 | 3.49 | H | E | 0.72 | -0.06 | 3.61 | H | E | 0.74 | -0.06 | 3.53 | H | E | 0.72 | -0.13 | 4.62 | H | E | 0.74 | -0.12 | 4.67 | H | E | 0.75 | -0.07 | 4.63 | H | E | 0.75 | -0.10</ |      |

|     |   |   |      |       |      |   |   |      |       |      |   |   |      |       |      |   |   |      |       |      |   |   |      |       |      |   |   |      |       |      |   |   |      |       |      |   |   |      |         |      |
|-----|---|---|------|-------|------|---|---|------|-------|------|---|---|------|-------|------|---|---|------|-------|------|---|---|------|-------|------|---|---|------|-------|------|---|---|------|-------|------|---|---|------|---------|------|
| 862 | H | E | 0.89 | -0.14 | 3.80 | H | E | 0.87 | -0.05 | 3.36 | H | E | 0.88 | -0.09 | 3.70 | H | E | 0.85 | -0.09 | 3.66 | H | E | 0.86 | -0.09 | 4.41 | H | E | 0.85 | -0.06 | 4.43 | H | E | 0.85 | -0.02 | 4.65 | H | E | 0.88 | -0.12   | 4.67 |
| 863 | H | E | 0.89 | -0.33 | 3.70 | H | E | 0.88 | -0.24 | 3.30 | H | E | 0.89 | -0.25 | 3.62 | H | E | 0.87 | -0.25 | 3.59 | H | E | 0.86 | -0.28 | 4.35 | H | E | 0.86 | -0.22 | 4.39 | H | E | 0.86 | -0.21 | 4.60 | H | E | 0.89 | -0.28   | 4.61 |
| 864 | H | B | 0.88 | -0.73 | 3.72 | H | B | 0.90 | -0.64 | 3.32 | H | B | 0.90 | -0.64 | 3.64 | H | B | 0.89 | -0.64 | 3.56 | H | B | 0.88 | -0.69 | 4.35 | H | B | 0.87 | -0.63 | 4.40 | H | B | 0.86 | -0.59 | 4.53 | H | B | 0.89 | -0.68   | 4.64 |
| 865 | H | B | 0.88 | -0.86 | 3.75 | H | B | 0.90 | -0.80 | 3.30 | H | B | 0.89 | -0.79 | 3.61 | H | B | 0.89 | -0.78 | 3.54 | H | B | 0.87 | -0.84 | 4.37 | H | B | 0.86 | -0.78 | 4.39 | H | B | 0.85 | -0.78 | 4.54 | H | B | 0.88 | -0.83   | 4.62 |
| 866 | H | E | 0.87 | -0.74 | 3.68 | H | E | 0.89 | -0.73 | 3.23 | H | E | 0.88 | -0.69 | 3.51 | H | E | 0.88 | -0.68 | 3.49 | H | E | 0.85 | -0.73 | 4.33 | H | E | 0.85 | -0.71 | 4.36 | H | E | 0.84 | -0.70 | 4.52 | H | E | 0.88 | -0.74   | 4.55 |
| 867 | H | B | 0.87 | -0.74 | 3.62 | H | B | 0.90 | -0.79 | 3.22 | H | B | 0.88 | -0.72 | 3.49 | H | B | 0.89 | -0.71 | 3.44 | H | B | 0.86 | -0.73 | 4.29 | H | B | 0.85 | -0.74 | 4.35 | H | B | 0.85 | -0.73 | 4.50 | H | B | 0.88 | -0.78   | 4.55 |
| 868 | H | B | 0.88 | -0.85 | 3.65 | H | B | 0.90 | -0.88 | 3.25 | H | B | 0.89 | -0.82 | 3.49 | H | B | 0.89 | -0.82 | 3.44 | H | B | 0.87 | -0.84 | 4.32 | H | B | 0.86 | -0.85 | 4.36 | H | B | 0.85 | -0.84 | 4.49 | H | B | 0.88 | -0.88   | 4.56 |
| 869 | H | B | 0.88 | -0.82 | 3.64 | H | B | 0.90 | -0.84 | 3.20 | H | B | 0.89 | -0.81 | 3.43 | H | B | 0.89 | -0.82 | 3.40 | H | B | 0.87 | -0.83 | 4.30 | H | B | 0.86 | -0.84 | 4.32 | H | B | 0.85 | -0.84 | 4.48 | H | B | 0.88 | -0.85   | 4.50 |
| 870 | H | E | 0.89 | -0.62 | 3.54 | H | E | 0.89 | -0.70 | 3.13 | H | E | 0.89 | -0.65 | 3.34 | H | E | 0.88 | -0.67 | 3.35 | H | E | 0.87 | -0.63 | 4.23 | H | E | 0.87 | -0.67 | 4.26 | H | E | 0.86 | -0.65 | 4.43 | H | E | 0.89 | -0.68   | 4.42 |
| 871 | H | B | 0.89 | -0.72 | 3.51 | H | B | 0.89 | -0.78 | 3.16 | H | B | 0.89 | -0.75 | 3.35 | H | B | 0.88 | -0.77 | 3.33 | H | B | 0.87 | -0.72 | 4.23 | H | B | 0.87 | -0.76 | 4.28 | H | B | 0.86 | -0.73 | 4.42 | H | B | 0.89 | -0.76   | 4.44 |
| 872 | H | B | 0.90 | -0.66 | 3.56 | H | B | 0.90 | -0.67 | 3.17 | H | B | 0.90 | -0.66 | 3.33 | H | B | 0.89 | -0.68 | 3.31 | H | B | 0.88 | -0.65 | 4.26 | H | B | 0.88 | -0.66 | 4.28 | H | B | 0.87 | -0.64 | 4.42 | H | B | 0.90 | -0.69   | 4.44 |
| 873 | H | E | 0.90 | -0.51 | 3.53 | H | E | 0.90 | -0.49 | 3.10 | H | E | 0.90 | -0.49 | 3.25 | H | E | 0.89 | -0.51 | 3.26 | H | E | 0.88 | -0.49 | 4.22 | H | E | 0.87 | -0.49 | 4.24 | H | E | 0.87 | -0.48 | 4.39 | H | E | 0.90 | -0.52   | 4.36 |
| 874 | H | E | 0.88 | -0.44 | 3.47 | H | E | 0.89 | -0.40 | 3.06 | H | E | 0.88 | -0.44 | 3.22 | H | E | 0.88 | -0.45 | 3.21 | H | E | 0.85 | -0.43 | 4.20 | H | E | 0.85 | -0.44 | 4.25 | H | E | 0.85 | -0.41 | 4.39 | H | E | 0.88 | -0.45   | 4.36 |
| 875 | H | B | 0.90 | -0.66 | 3.48 | H | B | 0.90 | -0.64 | 3.10 | H | B | 0.89 | -0.66 | 3.24 | H | B | 0.89 | -0.66 | 3.21 | H | B | 0.87 | -0.64 | 4.22 | H | B | 0.88 | -0.66 | 4.25 | H | B | 0.87 | -0.63 | 4.37 | H | B | 0.90 | -0.69   | 4.38 |
| 876 | H | B | 0.90 | -0.63 | 3.53 | H | B | 0.90 | -0.56 | 3.10 | H | B | 0.89 | -0.64 | 3.22 | H | B | 0.89 | -0.64 | 3.20 | H | B | 0.88 | -0.59 | 4.24 | H | B | 0.88 | -0.68 | 4.25 | H | B | 0.87 | -0.62 | 4.37 | H | B | 0.90 | -0.63   | 4.36 |
| 877 | H | E | 0.88 | -0.35 | 3.49 | H | E | 0.88 | -0.30 | 3.04 | H | E | 0.88 | -0.33 | 3.16 | H | E | 0.88 | -0.34 | 3.15 | H | E | 0.85 | -0.34 | 4.20 | H | E | 0.86 | -0.39 | 4.22 | H | E | 0.85 | -0.31 | 4.36 | H | E | 0.87 | -0.37   | 4.34 |
| 878 | H | E | 0.87 | -0.21 | 3.45 | H | E | 0.86 | -0.23 | 3.07 | H | E | 0.86 | -0.24 | 3.18 | H | E | 0.88 | -0.21 | 3.15 | H | E | 0.84 | -0.26 | 4.22 | H | E | 0.85 | -0.29 | 4.26 | H | E | 0.84 | -0.19 | 4.38 | H | E | 0.86 | -0.26   | 4.37 |
| 879 | C | B | 0.88 | -0.30 | 3.52 | C | B | 0.87 | -0.29 | 3.19 | C | B | 0.87 | -0.33 | 3.29 | C | B | 0.86 | -0.30 | 3.24 | C | B | 0.85 | -0.35 | 4.30 | C | B | 0.85 | -0.39 | 4.34 | C | B | 0.85 | -0.29 | 4.48 | C | B | 0.88 | -0.33   | 4.49 |
| 880 | C | E | 0.85 | -0.08 | 3.63 | C | E | 0.86 | -0.02 | 3.16 | C | E | 0.85 | -0.05 | 3.26 | C | E | 0.84 | -0.02 | 3.22 | C | E | 0.82 | -0.09 | 4.40 | C | E | 0.83 | -0.08 | 4.41 | C | E | 0.84 | -0.01 | 4.47 | C | E | 0.86 | -0.06   | 4.48 |
| 881 | C | E | 0.78 | 0.15  | 3.78 | C | E | 0.78 | 0.26  | 3.29 | C | E | 0.77 | 0.17  | 3.39 | C | E | 0.78 | 0.23  | 3.33 | C | E | 0.77 | 0.17  | 4.52 | C | E | 0.75 | 0.16  | 4.56 | C | E | 0.75 | 0.27  | 4.61 | C | E | 0.77 | 0.14    | 4.64 |
| 882 | C | E | 0.78 | 0.14  | 3.79 | C | E | 0.78 | 0.26  | 3.29 | C | E | 0.79 | 0.18  | 3.36 | C | E | 0.77 | 0.25  | 3.31 | C | E | 0.76 | 0.14  | 4.56 | C | E | 0.77 | 0.11  | 4.56 | C | E | 0.74 | 0.27  | 4.61 | C | E | 0.80 | 0.15    | 4.61 |
| 883 | C | E | 0.75 | 0.02  | 3.82 | C | E | 0.74 | 0.07  | 3.36 | C | E | 0.75 | 0.08  | 3.45 | C | E | 0.72 | 0.15  | 3.41 | C | E | 0.73 | -0.03 | 4.61 | C | E | 0.75 | 0.01  | 4.62 | C | E | 0.75 | 0.14  | 4.62 | C | E | 0.76 | 0.01    | 4.71 |
| 884 | C | B | 0.73 | -0.11 | 3.90 | C | B | 0.75 | -0.03 | 3.41 | C | B | 0.72 | -0.06 | 3.54 | C | B | 0.72 | 0.02  | 3.49 | C | B | 0.68 | -0.19 | 4.73 | C | B | 0.72 | -0.12 | 4.69 | C | B | 0.69 | 0.00  | 4.74 | C | B | 0.76 | -0.09   | 4.75 |
| 885 | C | E | 0.75 | 0.10  | 3.99 | C | E | 0.75 | 0.17  | 3.50 | C | E | 0.72 | 0.11  | 3.62 | C | E | 0.72 | 0.10  | 3.56 | C | E | 0.67 | 0.03  | 4.84 | C | E | 0.67 | 0.04  | 4.85 | C | E | 0.67 | 0.13  | 4.82 | C | E | 0.76 | 0.13    | 4.83 |
| 886 | H | E | 0.86 | 0.08  | 3.92 | H | E | 0.82 | 0.03  | 3.44 | H | E | 0.85 | 0.04  | 3.53 | H | E | 0.87 | 0.03  | 3.43 | H | E | 0.83 | 0.02  | 4.60 | H | E | 0.80 | 0.06  | 4.64 | H | E | 0.84 | 0.12  | 4.55 | H | E | 0.84 | 0.08    | 4.69 |
| 887 | H | E | 0.78 | -0.25 | 4.04 | H | E | 0.81 | -0.31 | 3.51 | H | E | 0.83 | -0.26 | 3.64 | H | E | 0.85 | -0.22 | 3.53 | H | E | 0.78 | -0.25 | 4.71 | H | E | 0.79 | -0.21 | 4.68 | H | E | 0.79 | -0.19 | 4.66 | H | E | 0.81 | -0.24   | 4.80 |
| 888 | H | B | 0.82 | -0.41 | 3.93 | H | B | 0.86 | -0.44 | 3.42 | H | B | 0.85 | -0.42 | 3.58 | H | B | 0.87 | -0.37 | 3.49 | H | B | 0.81 | -0.42 | 4.60 | H | B | 0.82 | -0.44 | 4.57 | H | B | 0.85 | -0.45 | 4.56 | H | B | 0.85 | -0.43   | 4.70 |
| 889 | H | B | 0.77 | -0.34 | 3.96 | H | B | 0.81 | -0.33 | 3.41 | H | B | 0.81 | -0.31 | 3.56 | H | B | 0.82 | -0.30 | 3.47 | H | E | 0.77 | -0.33 | 4.63 | H | B | 0.82 | -0.34 | 4.53 | H | B | 0.85 | -0.36 | 4.54 | H | B | 0.82 | -0.34   | 4.67 |
| 890 | H | E | 0.82 | -0.26 | 4.00 | H | E | 0.87 | -0.26 | 3.41 | H | E | 0.85 | -0.27 | 3.62 | H | E | 0.88 | -0.26 | 3.48 | H | E | 0.82 | -0.31 | 4.61 | H | E | 0.87 | -0.27 | 4.52 | H | E | 0.86 | -0.27 | 4.56 | H | E | 0.88 | -0.27   | 4.64 |
| 891 | H | E | 0.83 | -0.42 | 3.96 | H | E | 0.87 | -0.39 | 3.43 | H | E | 0.87 | -0.42 | 3.63 | H | E | 0.89 | -0.40 | 3.51 | H | E | 0.87 | -0.47 | 4.53 | H | E | 0.87 | -0.41 | 4.50 | H | E | 0.86 | -0.40 | 4.56 | H | E | 0.90 | -0.42   | 4.65 |
| 892 | H | B | 0.88 | -0.65 | 3.84 | H | B | 0.88 | -0.65 | 3.34 | H | B | 0.88 | -0.64 | 3.54 | H | B | 0.90 | -0.63 | 3.43 | H | B | 0.87 | -0.71 | 4.46 | H | B | 0.88 | -0.67 | 4.43 | H | B | 0.87 | -0.67 | 4.52 | H | B | 0.90 | -0.68   | 4.57 |
| 893 | H | B | 0.85 | -0.63 | 3.95 | H | B | 0.85 | -0.62 | 3.40 | H | B | 0.85 | -0.61 | 3.61 | H | B | 0.88 | -0.57 | 3.48 | H | B | 0.85 | -0.66 | 4.51 | H | B | 0.85 | -0.61 | 4.53 | H | B | 0.85 | -0.60 | 4.56 | H | B | 0.87 | -0.64   | 4.66 |
| 894 | H | E | 0.85 | -0.47 | 4.02 | H | E | 0.85 | -0.44 | 3.47 | H | E | 0.85 | -0.41 | 3.72 | H | E | 0.88 | -0.41 | 3.57 | H | E | 0.85 | -0.46 | 4.57 | H | E | 0.85 | -0.42 | 4.57 | H | E | 0.85 | -0.41 | 4.60 | H | E | 0.87 | -0.45   | 4.73 |
| 895 | H | B | 0.87 | -0.66 | 3.90 | H | B | 0.87 | -0.64 | 3.39 | H | B | 0.87 | -0.62 | 3.64 | H | B | 0.90 | -0.60 | 3.51 | H | B | 0.85 | -0.64 | 4.50 | H | B | 0.86 | -0.61 | 4.45 | H | B | 0.85 | -0.62 | 4.58 | H | B | 0.88 | -0.64   | 4.63 |
| 896 | H | B | 0.87 | -0.78 | 3.84 | H | B | 0.87 | -0.80 | 3.31 | H | B | 0.87 | -0.79 | 3.55 | H | B | 0.90 | -0.76 | 3.45 | H | B | 0.85 | -0.77 | 4.44 | H | B | 0.86 | -0.75 | 4.39 | H | B | 0.85 | -0.75 | 4.53 | H | B | 0.88 | -0.78   | 4.55 |
| 897 | H | B | 0.86 | -0.66 | 3.93 | H | B | 0.85 | -0.60 | 3.36 | H | B | 0.85 | -0.63 | 3.65 | H | B | 0.88 | -0.63 | 3.51 | H | B | 0.84 | -0.62 | 4.52 | H | B | 0.85 | -0.62 | 4.44 | H | B | 0.84 | -0.63 | 4.59 | H | B | 0.87 | -0.67   | 4.61 |
| 898 | H | E | 0.86 | -0.50 | 3.96 | H | E | 0.85 | -0.44 | 3.42 | H | E | 0.85 | -0.49 | 3.74 | H | E | 0.88 | -0.50 | 3.58 | H | E | 0.84 | -0.46 | 4.55 | H | E | 0.84 | -0.47 | 4.49 | H | E | 0.84 | -0.47 | 4.62 | H | E | 0.87 | -0.50   | 4.68 |
| 899 | H | B | 0.85 | -0.51 | 3.90 | H | B | 0.84 | -0.51 | 3.38 | H | B | 0.83 | -0.52 | 3.69 | H | B | 0.88 | -0.52 | 3.56 | H | B | 0.82 | -0.52 | 4.51 | H | B | 0.83 | -0.51 | 4.45 | H | B | 0.82 | -0.50 | 4.61 | H | B | 0.85 | -0.53   | 4.66 |
| 900 | H | B | 0.85 | -0.45 | 3.89 | H | B | 0.84 | -0.46 | 3.34 | H | B | 0.82 | -0.45 | 3.65 | H | B | 0.88 | -0.46 | 3.52 | H | B | 0.82 | -0.46 | 4.50 | H | B | 0.83 | -0.45 | 4.42 | H | B | 0.82 | -0.45 | 4.61 | H | B | 0.85 | -0.50   | 4.62 |
| 901 | H | E | 0.84 | -0.07 | 4.00 | H | E | 0.85 | -0.13 | 3.41 | H | E | 0.82 | -0.10 | 3.78 | H | E | 0.89 | -0.07 | 3.60 | H | E | 0.82 | -0.08 | 4.57 | H | E | 0.84 | -0.09 | 4.48 | H | E | 0.82 | -0.08 | 4.67 | H | E | 0.85 | -0.11</ |      |

|     |   |   |      |       |      |   |   |      |       |      |   |   |      |       |      |   |   |      |       |      |   |   |      |       |      |   |   |      |       |      |   |   |      |       |      |   |   |      |       |      |
|-----|---|---|------|-------|------|---|---|------|-------|------|---|---|------|-------|------|---|---|------|-------|------|---|---|------|-------|------|---|---|------|-------|------|---|---|------|-------|------|---|---|------|-------|------|
| 916 | H | E | 0.89 | -0.61 | 3.59 | H | E | 0.90 | -0.56 | 3.05 | H | B | 0.89 | -0.63 | 3.20 | H | B | 0.91 | -0.62 | 3.18 | H | E | 0.88 | -0.61 | 4.23 | H | E | 0.88 | -0.61 | 4.19 | H | B | 0.87 | -0.62 | 4.38 | H | B | 0.91 | -0.64 | 4.29 |
| 917 | H | B | 0.89 | -0.69 | 3.66 | H | B | 0.90 | -0.67 | 3.12 | H | B | 0.89 | -0.72 | 3.28 | H | B | 0.91 | -0.69 | 3.23 | H | B | 0.88 | -0.69 | 4.29 | H | B | 0.88 | -0.72 | 4.25 | H | B | 0.87 | -0.70 | 4.41 | H | B | 0.91 | -0.71 | 4.35 |
| 918 | H | B | 0.89 | -0.59 | 3.72 | H | B | 0.90 | -0.60 | 3.12 | H | B | 0.89 | -0.61 | 3.29 | H | B | 0.91 | -0.59 | 3.21 | H | B | 0.88 | -0.59 | 4.33 | H | B | 0.88 | -0.63 | 4.27 | H | B | 0.87 | -0.58 | 4.42 | H | B | 0.91 | -0.61 | 4.35 |
| 919 | H | E | 0.90 | -0.33 | 3.65 | H | E | 0.90 | -0.36 | 3.05 | H | E | 0.89 | -0.35 | 3.20 | H | E | 0.91 | -0.35 | 3.13 | H | E | 0.88 | -0.35 | 4.27 | H | E | 0.88 | -0.38 | 4.23 | H | E | 0.87 | -0.34 | 4.38 | H | E | 0.91 | -0.37 | 4.29 |
| 920 | H | B | 0.89 | -0.23 | 3.69 | H | B | 0.90 | -0.33 | 3.07 | H | B | 0.88 | -0.30 | 3.20 | H | B | 0.91 | -0.24 | 3.13 | H | B | 0.87 | -0.26 | 4.29 | H | B | 0.88 | -0.38 | 4.27 | H | B | 0.86 | -0.28 | 4.38 | H | B | 0.90 | -0.31 | 4.33 |
| 921 | H | B | 0.90 | -0.27 | 3.77 | H | B | 0.90 | -0.33 | 3.14 | H | B | 0.89 | -0.32 | 3.27 | H | B | 0.91 | -0.24 | 3.18 | H | B | 0.88 | -0.31 | 4.36 | H | B | 0.89 | -0.38 | 4.32 | H | B | 0.87 | -0.31 | 4.41 | H | B | 0.91 | -0.30 | 4.38 |
| 922 | H | E | 0.89 | -0.06 | 3.76 | H | E | 0.90 | 0.01  | 3.13 | H | E | 0.88 | -0.06 | 3.26 | H | E | 0.91 | -0.03 | 3.12 | H | E | 0.87 | -0.06 | 4.37 | H | E | 0.89 | -0.09 | 4.35 | H | E | 0.86 | -0.03 | 4.41 | H | E | 0.90 | -0.06 | 4.44 |
| 923 | H | E | 0.89 | 0.10  | 3.85 | H | E | 0.90 | 0.08  | 3.17 | H | E | 0.88 | 0.02  | 3.33 | H | E | 0.91 | 0.08  | 3.15 | H | E | 0.87 | 0.10  | 4.44 | H | E | 0.89 | 0.07  | 4.41 | H | E | 0.86 | 0.14  | 4.44 | H | E | 0.90 | 0.07  | 4.49 |
| 924 | H | E | 0.89 | -0.00 | 3.86 | H | E | 0.90 | -0.03 | 3.21 | H | E | 0.89 | -0.08 | 3.36 | H | E | 0.90 | -0.06 | 3.22 | H | E | 0.87 | 0.03  | 4.47 | H | E | 0.89 | -0.01 | 4.43 | H | E | 0.87 | 0.05  | 4.45 | H | E | 0.90 | -0.00 | 4.53 |
| 925 | H | B | 0.88 | -0.19 | 3.88 | H | B | 0.89 | -0.18 | 3.22 | H | B | 0.88 | -0.24 | 3.40 | H | B | 0.89 | -0.20 | 3.26 | H | B | 0.86 | -0.18 | 4.48 | H | B | 0.88 | -0.21 | 4.41 | H | B | 0.86 | -0.18 | 4.48 | H | B | 0.89 | -0.19 | 4.54 |
| 926 | H | E | 0.88 | -0.08 | 3.96 | H | E | 0.89 | -0.12 | 3.25 | H | E | 0.88 | -0.14 | 3.51 | H | E | 0.89 | -0.10 | 3.26 | H | E | 0.86 | -0.10 | 4.60 | H | E | 0.88 | -0.13 | 4.46 | H | E | 0.86 | -0.12 | 4.57 | H | E | 0.89 | -0.07 | 4.48 |
| 927 | H | E | 0.88 | -0.08 | 4.04 | H | E | 0.89 | -0.09 | 3.33 | H | E | 0.88 | -0.11 | 3.61 | H | E | 0.90 | -0.12 | 3.34 | H | E | 0.86 | -0.09 | 4.60 | H | E | 0.88 | -0.11 | 4.54 | H | E | 0.86 | -0.13 | 4.54 | H | E | 0.89 | -0.08 | 4.55 |
| 928 | H | B | 0.88 | -0.36 | 4.01 | H | B | 0.89 | -0.35 | 3.33 | H | B | 0.88 | -0.36 | 3.57 | H | B | 0.90 | -0.38 | 3.38 | H | B | 0.85 | -0.34 | 4.58 | H | B | 0.87 | -0.34 | 4.50 | H | B | 0.85 | -0.36 | 4.55 | H | B | 0.88 | -0.36 | 4.56 |
| 929 | H | B | 0.87 | -0.49 | 4.02 | H | B | 0.89 | -0.50 | 3.30 | H | B | 0.87 | -0.47 | 3.58 | H | B | 0.90 | -0.50 | 3.35 | H | B | 0.85 | -0.48 | 4.57 | H | B | 0.86 | -0.45 | 4.49 | H | B | 0.85 | -0.45 | 4.56 | H | B | 0.88 | -0.47 | 4.54 |
| 930 | H | E | 0.87 | -0.29 | 4.12 | H | E | 0.89 | -0.27 | 3.37 | H | E | 0.87 | -0.25 | 3.70 | H | E | 0.90 | -0.29 | 3.41 | H | E | 0.85 | -0.28 | 4.64 | H | E | 0.86 | -0.21 | 4.56 | H | E | 0.85 | -0.22 | 4.61 | H | E | 0.88 | -0.26 | 4.60 |
| 931 | H | E | 0.87 | -0.32 | 4.09 | H | E | 0.89 | -0.31 | 3.39 | H | E | 0.87 | -0.28 | 3.72 | H | E | 0.90 | -0.33 | 3.47 | H | E | 0.85 | -0.30 | 4.63 | H | E | 0.86 | -0.24 | 4.54 | H | E | 0.84 | -0.25 | 4.63 | H | E | 0.88 | -0.28 | 4.63 |
| 932 | H | B | 0.85 | -0.59 | 4.03 | H | B | 0.88 | -0.54 | 3.32 | H | B | 0.85 | -0.57 | 3.64 | H | B | 0.90 | -0.58 | 3.42 | H | B | 0.82 | -0.57 | 4.59 | H | B | 0.84 | -0.52 | 4.49 | H | B | 0.82 | -0.56 | 4.62 | H | B | 0.85 | -0.58 | 4.59 |
| 933 | H | B | 0.86 | -0.61 | 4.05 | H | B | 0.89 | -0.58 | 3.31 | H | B | 0.86 | -0.61 | 3.66 | H | B | 0.90 | -0.60 | 3.41 | H | B | 0.84 | -0.61 | 4.58 | H | B | 0.85 | -0.52 | 4.48 | H | B | 0.83 | -0.57 | 4.61 | H | B | 0.87 | -0.60 | 4.56 |
| 934 | H | E | 0.86 | -0.53 | 4.14 | H | E | 0.88 | -0.57 | 3.39 | H | E | 0.86 | -0.55 | 3.78 | H | E | 0.89 | -0.55 | 3.50 | H | E | 0.84 | -0.57 | 4.65 | H | E | 0.85 | -0.49 | 4.55 | H | E | 0.83 | -0.51 | 4.65 | H | E | 0.87 | -0.55 | 4.64 |
| 935 | H | B | 0.86 | -0.53 | 4.08 | H | B | 0.88 | -0.55 | 3.38 | H | B | 0.86 | -0.55 | 3.76 | H | B | 0.89 | -0.55 | 3.53 | H | B | 0.84 | -0.55 | 4.61 | H | B | 0.85 | -0.53 | 4.51 | H | B | 0.83 | -0.52 | 4.64 | H | B | 0.87 | -0.58 | 4.64 |
| 936 | H | B | 0.86 | -0.66 | 4.03 | H | B | 0.88 | -0.67 | 3.32 | H | B | 0.86 | -0.69 | 3.68 | H | B | 0.89 | -0.69 | 3.47 | H | B | 0.84 | -0.65 | 4.56 | H | B | 0.85 | -0.68 | 4.44 | H | B | 0.83 | -0.65 | 4.61 | H | B | 0.87 | -0.71 | 4.57 |
| 937 | H | E | 0.87 | -0.60 | 4.11 | H | E | 0.88 | -0.60 | 3.37 | H | E | 0.87 | -0.58 | 3.77 | H | E | 0.89 | -0.61 | 3.52 | H | E | 0.85 | -0.59 | 4.60 | H | E | 0.86 | -0.58 | 4.49 | H | E | 0.84 | -0.56 | 4.63 | H | E | 0.88 | -0.63 | 4.61 |
| 938 | H | E | 0.87 | -0.44 | 4.16 | H | E | 0.88 | -0.46 | 3.44 | H | E | 0.87 | -0.47 | 3.86 | H | E | 0.89 | -0.51 | 3.60 | H | E | 0.85 | -0.50 | 4.65 | H | E | 0.86 | -0.48 | 4.52 | H | E | 0.85 | -0.44 | 4.66 | H | E | 0.88 | -0.50 | 4.68 |
| 939 | H | B | 0.87 | -0.46 | 4.08 | H | B | 0.88 | -0.50 | 3.38 | H | B | 0.87 | -0.53 | 3.80 | H | B | 0.90 | -0.49 | 3.59 | H | B | 0.85 | -0.55 | 4.59 | H | B | 0.86 | -0.54 | 4.47 | H | B | 0.85 | -0.49 | 4.64 | H | B | 0.88 | -0.52 | 4.66 |
| 940 | H | B | 0.88 | -0.43 | 4.07 | H | B | 0.88 | -0.40 | 3.41 | H | B | 0.88 | -0.41 | 3.76 | H | B | 0.90 | -0.45 | 3.57 | H | B | 0.85 | -0.45 | 4.57 | H | B | 0.87 | -0.47 | 4.45 | H | B | 0.85 | -0.38 | 4.63 | H | B | 0.88 | -0.44 | 4.62 |
| 941 | C | E | 0.85 | -0.07 | 4.26 | C | E | 0.88 | -0.03 | 3.46 | C | E | 0.85 | -0.04 | 3.98 | C | E | 0.88 | -0.09 | 3.74 | C | E | 0.83 | -0.05 | 4.79 | C | E | 0.85 | -0.08 | 4.66 | C | E | 0.85 | 0.00  | 4.80 | C | E | 0.86 | -0.06 | 4.77 |
| 942 | C | B | 0.87 | -0.09 | 4.24 | C | B | 0.88 | 0.00  | 3.50 | C | B | 0.86 | -0.05 | 3.99 | C | B | 0.88 | -0.07 | 3.83 | C | B | 0.85 | -0.07 | 4.73 | C | B | 0.86 | -0.06 | 4.60 | C | B | 0.84 | -0.03 | 4.78 | C | B | 0.87 | -0.06 | 4.83 |
| 943 | C | E | 0.83 | 0.22  | 4.23 | C | E | 0.85 | 0.26  | 3.53 | C | E | 0.83 | 0.26  | 4.00 | C | E | 0.86 | 0.27  | 3.82 | C | E | 0.80 | 0.18  | 4.77 | C | E | 0.82 | 0.20  | 4.63 | C | E | 0.82 | 0.24  | 4.79 | C | E | 0.82 | 0.21  | 4.91 |
| 944 | C | E | 0.88 | 0.16  | 4.17 | C | E | 0.88 | 0.14  | 3.47 | C | E | 0.87 | 0.18  | 3.95 | C | E | 0.88 | 0.17  | 3.85 | C | E | 0.85 | 0.13  | 4.68 | C | E | 0.85 | 0.11  | 4.56 | C | E | 0.85 | 0.16  | 4.74 | C | E | 0.88 | 0.16  | 4.79 |
| 945 | H | E | 0.85 | -0.05 | 4.07 | H | E | 0.88 | -0.07 | 3.35 | H | E | 0.87 | -0.02 | 3.78 | H | E | 0.87 | -0.05 | 3.69 | H | E | 0.86 | -0.05 | 4.51 | H | E | 0.86 | -0.04 | 4.42 | H | E | 0.85 | -0.02 | 4.62 | H | E | 0.88 | -0.02 | 4.65 |
| 946 | H | E | 0.85 | -0.25 | 3.98 | H | E | 0.88 | -0.25 | 3.30 | H | E | 0.88 | -0.22 | 3.71 | H | E | 0.88 | -0.26 | 3.67 | H | E | 0.86 | -0.28 | 4.46 | H | E | 0.87 | -0.26 | 4.37 | H | E | 0.85 | -0.25 | 4.59 | H | E | 0.88 | -0.28 | 4.62 |
| 947 | H | B | 0.88 | -0.62 | 3.94 | H | B | 0.89 | -0.66 | 3.28 | H | B | 0.88 | -0.66 | 3.67 | H | B | 0.90 | -0.64 | 3.59 | H | B | 0.86 | -0.69 | 4.46 | H | B | 0.88 | -0.67 | 4.35 | H | B | 0.86 | -0.67 | 4.57 | H | B | 0.89 | -0.66 | 4.57 |
| 948 | H | B | 0.88 | -0.68 | 3.96 | H | B | 0.89 | -0.67 | 3.27 | H | B | 0.88 | -0.69 | 3.66 | H | B | 0.90 | -0.67 | 3.56 | H | B | 0.86 | -0.72 | 4.46 | H | B | 0.88 | -0.69 | 4.35 | H | B | 0.86 | -0.69 | 4.56 | H | B | 0.89 | -0.69 | 4.55 |
| 949 | H | E | 0.88 | -0.60 | 3.87 | H | E | 0.89 | -0.62 | 3.19 | H | E | 0.89 | -0.65 | 3.53 | H | E | 0.89 | -0.65 | 3.50 | H | E | 0.86 | -0.66 | 4.38 | H | E | 0.88 | -0.66 | 4.29 | H | E | 0.86 | -0.64 | 4.51 | H | E | 0.89 | -0.67 | 4.46 |
| 950 | H | B | 0.88 | -0.76 | 3.82 | H | B | 0.89 | -0.75 | 3.19 | H | B | 0.88 | -0.79 | 3.51 | H | B | 0.90 | -0.81 | 3.47 | H | B | 0.87 | -0.80 | 4.36 | H | B | 0.88 | -0.80 | 4.26 | H | B | 0.87 | -0.78 | 4.49 | H | B | 0.90 | -0.80 | 4.44 |
| 951 | H | B | 0.88 | -0.81 | 3.89 | H | B | 0.89 | -0.79 | 3.23 | H | B | 0.88 | -0.88 | 3.56 | H | B | 0.90 | -0.88 | 3.46 | H | B | 0.86 | -0.87 | 4.42 | H | B | 0.88 | -0.87 | 4.32 | H | B | 0.87 | -0.88 | 4.51 | H | B | 0.89 | -0.90 | 4.48 |
| 952 | H | B | 0.88 | -0.78 | 3.87 | H | B | 0.88 | -0.75 | 3.20 | H | B | 0.88 | -0.86 | 3.51 | H | B | 0.90 | -0.86 | 3.42 | H | B | 0.86 | -0.84 | 4.39 | H | B | 0.88 | -0.84 | 4.30 | H | B | 0.87 | -0.86 | 4.49 | H | B | 0.89 | -0.88 | 4.43 |
| 953 | H | E | 0.88 | -0.58 | 3.78 | H | E | 0.89 | -0.57 | 3.12 | H | E | 0.88 | -0.67 | 3.40 | H | E | 0.90 | -0.68 | 3.36 | H | E | 0.86 | -0.64 | 4.33 | H | E | 0.88 | -0.66 | 4.24 | H | E | 0.86 | -0.67 | 4.46 | H | E | 0.89 | -0.67 | 4.37 |
| 954 | H | B | 0.88 | -0.70 | 3.81 | H | B | 0.88 | -0.71 | 3.17 | H | B | 0.88 | -0.75 | 3.43 | H | B | 0.90 | -0.75 | 3.36 | H | B | 0.86 | -0.73 | 4.37 | H | B | 0.88 | -0.74 | 4.27 | H | B | 0.86 | -0.75 | 4.48 | H | B | 0.89 | -0.75 | 4.40 |
| 955 | H | B | 0.88 | -0.77 | 3.86 | H | B | 0.88 | -0.75 | 3.19 | H | B | 0.88 | -0.77 | 3.45 | H | B | 0.90 | -0.78 | 3.33 | H | B | 0.86 | -0.80 | 4.40 | H | B | 0.88 | -0.77 | 4.30 | H | B | 0.86 | -0.78 | 4.49 | H | B | 0.89 | -0.77 |      |

|      |   |   |      |       |      |   |   |      |       |      |   |   |      |       |      |   |   |      |       |      |   |   |      |       |      |   |   |      |       |      |   |   |      |       |      |   |   |      |       |      |
|------|---|---|------|-------|------|---|---|------|-------|------|---|---|------|-------|------|---|---|------|-------|------|---|---|------|-------|------|---|---|------|-------|------|---|---|------|-------|------|---|---|------|-------|------|
| 970  | H | B | 0.88 | -0.42 | 4.11 | H | B | 0.89 | -0.39 | 3.29 | H | B | 0.88 | -0.46 | 3.65 | H | B | 0.90 | -0.38 | 3.31 | H | B | 0.85 | -0.42 | 4.58 | H | B | 0.88 | -0.41 | 4.52 | H | B | 0.85 | -0.42 | 4.57 | H | B | 0.89 | -0.42 | 4.51 |
| 971  | H | B | 0.88 | -0.50 | 4.08 | H | B | 0.89 | -0.52 | 3.24 | H | B | 0.88 | -0.57 | 3.61 | H | B | 0.90 | -0.49 | 3.26 | H | B | 0.86 | -0.54 | 4.52 | H | B | 0.88 | -0.52 | 4.48 | H | B | 0.85 | -0.51 | 4.54 | H | B | 0.89 | -0.52 | 4.46 |
| 972  | H | E | 0.87 | -0.31 | 4.18 | H | E | 0.89 | -0.29 | 3.31 | H | E | 0.87 | -0.34 | 3.73 | H | E | 0.90 | -0.29 | 3.31 | H | E | 0.85 | -0.33 | 4.59 | H | E | 0.87 | -0.27 | 4.57 | H | E | 0.85 | -0.25 | 4.59 | H | E | 0.88 | -0.26 | 4.53 |
| 973  | H | E | 0.87 | -0.47 | 4.17 | H | E | 0.89 | -0.43 | 3.33 | H | E | 0.87 | -0.53 | 3.75 | H | E | 0.90 | -0.45 | 3.38 | H | E | 0.85 | -0.51 | 4.62 | H | E | 0.87 | -0.44 | 4.55 | H | E | 0.85 | -0.38 | 4.61 | H | E | 0.88 | -0.42 | 4.55 |
| 974  | H | B | 0.87 | -0.62 | 4.07 | H | B | 0.89 | -0.65 | 3.27 | H | B | 0.86 | -0.73 | 3.66 | H | B | 0.90 | -0.65 | 3.35 | H | B | 0.85 | -0.72 | 4.54 | H | B | 0.86 | -0.68 | 4.47 | H | B | 0.84 | -0.66 | 4.58 | H | B | 0.88 | -0.62 | 4.50 |
| 975  | H | B | 0.84 | -0.62 | 4.12 | H | B | 0.88 | -0.68 | 3.27 | H | B | 0.86 | -0.69 | 3.66 | H | B | 0.90 | -0.66 | 3.33 | H | B | 0.84 | -0.68 | 4.53 | H | B | 0.85 | -0.64 | 4.49 | H | B | 0.83 | -0.62 | 4.58 | H | B | 0.87 | -0.58 | 4.50 |
| 976  | H | E | 0.86 | -0.54 | 4.18 | H | E | 0.88 | -0.58 | 3.34 | H | B | 0.87 | -0.62 | 3.77 | H | B | 0.90 | -0.59 | 3.40 | H | E | 0.85 | -0.58 | 4.56 | H | E | 0.87 | -0.56 | 4.54 | H | B | 0.85 | -0.57 | 4.60 | H | E | 0.88 | -0.53 | 4.54 |
| 977  | H | B | 0.86 | -0.65 | 4.17 | H | B | 0.88 | -0.68 | 3.36 | H | B | 0.87 | -0.72 | 3.78 | H | B | 0.90 | -0.69 | 3.46 | H | B | 0.85 | -0.71 | 4.58 | H | B | 0.87 | -0.65 | 4.52 | H | B | 0.85 | -0.65 | 4.61 | H | B | 0.88 | -0.67 | 4.56 |
| 978  | H | B | 0.87 | -0.78 | 4.07 | H | B | 0.88 | -0.78 | 3.29 | H | B | 0.87 | -0.80 | 3.68 | H | B | 0.90 | -0.79 | 3.43 | H | B | 0.85 | -0.80 | 4.50 | H | B | 0.87 | -0.77 | 4.44 | H | B | 0.85 | -0.76 | 4.57 | H | B | 0.88 | -0.79 | 4.51 |
| 979  | H | B | 0.86 | -0.75 | 4.12 | H | B | 0.88 | -0.77 | 3.31 | H | B | 0.86 | -0.76 | 3.73 | H | B | 0.90 | -0.76 | 3.44 | H | B | 0.85 | -0.77 | 4.51 | H | B | 0.87 | -0.75 | 4.48 | H | B | 0.85 | -0.76 | 4.58 | H | B | 0.88 | -0.78 | 4.53 |
| 980  | H | E | 0.88 | -0.41 | 4.17 | H | E | 0.88 | -0.38 | 3.37 | H | E | 0.87 | -0.44 | 3.82 | H | E | 0.90 | -0.42 | 3.52 | H | E | 0.85 | -0.44 | 4.56 | H | E | 0.87 | -0.45 | 4.53 | H | E | 0.85 | -0.44 | 4.70 | H | E | 0.88 | -0.48 | 4.60 |
| 981  | H | B | 0.88 | -0.41 | 4.10 | H | B | 0.89 | -0.37 | 3.32 | H | B | 0.87 | -0.42 | 3.77 | H | B | 0.90 | -0.43 | 3.55 | H | B | 0.85 | -0.40 | 4.52 | H | B | 0.87 | -0.43 | 4.47 | H | B | 0.85 | -0.41 | 4.68 | H | B | 0.88 | -0.45 | 4.58 |
| 982  | H | B | 0.88 | -0.40 | 4.07 | H | B | 0.88 | -0.44 | 3.30 | H | B | 0.87 | -0.39 | 3.72 | H | B | 0.89 | -0.39 | 3.54 | H | B | 0.85 | -0.41 | 4.48 | H | B | 0.86 | -0.42 | 4.46 | H | B | 0.85 | -0.39 | 4.67 | H | B | 0.88 | -0.44 | 4.56 |
| 983  | C | E | 0.86 | -0.01 | 4.23 | C | E | 0.87 | -0.07 | 3.40 | C | E | 0.85 | -0.07 | 3.86 | C | E | 0.88 | 0.02  | 3.71 | C | E | 0.83 | -0.10 | 4.60 | C | E | 0.85 | -0.10 | 4.57 | C | E | 0.84 | -0.04 | 4.68 | C | E | 0.85 | -0.12 | 4.70 |
| 984  | C | E | 0.87 | 0.07  | 4.13 | C | E | 0.87 | 0.04  | 3.39 | C | E | 0.85 | 0.03  | 3.83 | C | E | 0.88 | 0.11  | 3.68 | C | E | 0.83 | 0.00  | 4.59 | C | E | 0.85 | 0.08  | 4.54 | C | E | 0.84 | 0.10  | 4.69 | C | E | 0.86 | 0.09  | 4.70 |
| 985  | C | E | 0.83 | 0.24  | 4.15 | C | E | 0.86 | 0.19  | 3.39 | C | E | 0.83 | 0.24  | 3.84 | C | E | 0.88 | 0.30  | 3.73 | C | E | 0.81 | 0.20  | 4.61 | C | E | 0.82 | 0.30  | 4.57 | C | E | 0.81 | 0.40  | 4.73 | C | E | 0.84 | 0.31  | 4.74 |
| 986  | C | E | 0.78 | -0.09 | 4.11 | C | E | 0.82 | -0.17 | 3.38 | C | E | 0.78 | -0.09 | 3.82 | C | E | 0.81 | -0.05 | 3.78 | C | E | 0.75 | -0.11 | 4.65 | C | E | 0.77 | -0.06 | 4.59 | C | E | 0.75 | -0.01 | 4.78 | C | E | 0.78 | -0.10 | 4.79 |
| 987  | H | E | 0.85 | -0.21 | 3.91 | H | E | 0.86 | -0.35 | 3.22 | H | E | 0.85 | -0.21 | 3.59 | H | E | 0.88 | -0.20 | 3.61 | H | E | 0.82 | -0.23 | 4.42 | H | E | 0.85 | -0.21 | 4.35 | H | E | 0.82 | -0.17 | 4.57 | H | E | 0.86 | -0.21 | 4.53 |
| 988  | H | E | 0.88 | -0.32 | 3.84 | H | E | 0.88 | -0.45 | 3.18 | H | E | 0.86 | -0.32 | 3.54 | H | E | 0.89 | -0.32 | 3.55 | H | E | 0.84 | -0.35 | 4.37 | H | E | 0.86 | -0.31 | 4.30 | H | E | 0.84 | -0.27 | 4.54 | H | E | 0.88 | -0.30 | 4.47 |
| 989  | H | B | 0.88 | -0.60 | 3.91 | H | B | 0.88 | -0.67 | 3.21 | H | B | 0.87 | -0.61 | 3.59 | H | B | 0.89 | -0.58 | 3.54 | H | B | 0.85 | -0.59 | 4.40 | H | B | 0.87 | -0.57 | 4.32 | H | B | 0.85 | -0.55 | 4.53 | H | B | 0.88 | -0.60 | 4.49 |
| 990  | H | B | 0.88 | -0.66 | 3.92 | H | B | 0.88 | -0.73 | 3.20 | H | B | 0.87 | -0.70 | 3.57 | H | B | 0.89 | -0.67 | 3.51 | H | B | 0.85 | -0.64 | 4.38 | H | B | 0.87 | -0.66 | 4.32 | H | B | 0.85 | -0.66 | 4.52 | H | B | 0.88 | -0.68 | 4.47 |
| 991  | H | B | 0.88 | -0.72 | 3.81 | H | B | 0.89 | -0.75 | 3.12 | H | B | 0.88 | -0.73 | 3.44 | H | B | 0.90 | -0.70 | 3.44 | H | B | 0.86 | -0.65 | 4.29 | H | B | 0.88 | -0.69 | 4.25 | H | B | 0.86 | -0.68 | 4.47 | H | B | 0.89 | -0.71 | 4.38 |
| 992  | H | B | 0.88 | -0.81 | 3.80 | H | B | 0.89 | -0.79 | 3.12 | H | B | 0.88 | -0.79 | 3.43 | H | B | 0.90 | -0.77 | 3.41 | H | B | 0.86 | -0.74 | 4.31 | H | B | 0.88 | -0.75 | 4.24 | H | B | 0.86 | -0.77 | 4.47 | H | B | 0.89 | -0.75 | 4.38 |
| 993  | H | B | 0.88 | -0.88 | 3.89 | H | B | 0.89 | -0.87 | 3.17 | H | B | 0.88 | -0.86 | 3.52 | H | B | 0.90 | -0.86 | 3.42 | H | B | 0.86 | -0.85 | 4.36 | H | B | 0.88 | -0.83 | 4.29 | H | B | 0.86 | -0.84 | 4.49 | H | B | 0.89 | -0.85 | 4.41 |
| 994  | H | B | 0.88 | -0.84 | 3.86 | H | B | 0.88 | -0.89 | 3.14 | H | B | 0.88 | -0.86 | 3.46 | H | B | 0.89 | -0.83 | 3.37 | H | B | 0.86 | -0.81 | 4.31 | H | B | 0.88 | -0.81 | 4.27 | H | B | 0.86 | -0.82 | 4.47 | H | B | 0.89 | -0.82 | 4.37 |
| 995  | H | E | 0.88 | -0.64 | 3.77 | H | E | 0.89 | -0.68 | 3.07 | H | E | 0.88 | -0.65 | 3.35 | H | E | 0.90 | -0.67 | 3.31 | H | E | 0.86 | -0.62 | 4.26 | H | E | 0.88 | -0.62 | 4.21 | H | E | 0.86 | -0.62 | 4.43 | H | E | 0.89 | -0.65 | 4.31 |
| 996  | H | B | 0.88 | -0.78 | 3.83 | H | B | 0.89 | -0.80 | 3.11 | H | B | 0.88 | -0.78 | 3.42 | H | B | 0.90 | -0.78 | 3.30 | H | B | 0.86 | -0.76 | 4.33 | H | B | 0.88 | -0.75 | 4.26 | H | B | 0.86 | -0.77 | 4.46 | H | B | 0.89 | -0.78 | 4.35 |
| 997  | H | B | 0.88 | -0.73 | 3.89 | H | B | 0.89 | -0.75 | 3.13 | H | B | 0.88 | -0.71 | 3.45 | H | B | 0.90 | -0.73 | 3.29 | H | B | 0.86 | -0.72 | 4.34 | H | B | 0.88 | -0.70 | 4.30 | H | B | 0.86 | -0.71 | 4.46 | H | B | 0.89 | -0.71 | 4.36 |
| 998  | H | E | 0.88 | -0.56 | 3.82 | H | E | 0.89 | -0.61 | 3.06 | H | E | 0.86 | -0.54 | 3.36 | H | E | 0.90 | -0.57 | 3.23 | H | E | 0.85 | -0.54 | 4.28 | H | E | 0.87 | -0.54 | 4.25 | H | E | 0.85 | -0.54 | 4.43 | H | E | 0.88 | -0.58 | 4.31 |
| 999  | H | B | 0.88 | -0.58 | 3.78 | H | B | 0.89 | -0.60 | 3.04 | H | B | 0.86 | -0.57 | 3.32 | H | B | 0.90 | -0.55 | 3.18 | H | B | 0.85 | -0.56 | 4.29 | H | B | 0.87 | -0.58 | 4.23 | H | B | 0.85 | -0.58 | 4.42 | H | B | 0.88 | -0.60 | 4.29 |
| 1000 | H | B | 0.87 | -0.67 | 3.89 | H | B | 0.88 | -0.69 | 3.11 | H | B | 0.85 | -0.68 | 3.43 | H | B | 0.89 | -0.67 | 3.21 | H | B | 0.84 | -0.67 | 4.38 | H | B | 0.86 | -0.69 | 4.32 | H | B | 0.85 | -0.69 | 4.46 | H | B | 0.88 | -0.67 | 4.35 |
| 1001 | H | B | 0.87 | -0.66 | 3.90 | H | B | 0.88 | -0.65 | 3.10 | H | B | 0.86 | -0.66 | 3.41 | H | B | 0.89 | -0.66 | 3.17 | H | B | 0.85 | -0.62 | 4.32 | H | B | 0.86 | -0.64 | 4.32 | H | B | 0.85 | -0.64 | 4.45 | H | B | 0.88 | -0.64 | 4.34 |
| 1002 | H | E | 0.87 | -0.40 | 3.82 | H | E | 0.88 | -0.39 | 3.04 | H | E | 0.86 | -0.41 | 3.31 | H | E | 0.89 | -0.41 | 3.10 | H | E | 0.85 | -0.36 | 4.27 | H | E | 0.86 | -0.41 | 4.27 | H | E | 0.85 | -0.35 | 4.41 | H | E | 0.88 | -0.39 | 4.37 |
| 1003 | H | B | 0.86 | -0.34 | 3.88 | H | B | 0.88 | -0.35 | 3.08 | H | B | 0.85 | -0.35 | 3.37 | H | B | 0.89 | -0.31 | 3.10 | H | B | 0.84 | -0.33 | 4.35 | H | B | 0.85 | -0.36 | 4.35 | H | B | 0.83 | -0.28 | 4.46 | H | B | 0.86 | -0.32 | 4.43 |
| 1004 | H | B | 0.83 | -0.26 | 4.06 | H | B | 0.88 | -0.28 | 3.20 | H | B | 0.85 | -0.31 | 3.54 | H | B | 0.88 | -0.22 | 3.19 | H | B | 0.82 | -0.28 | 4.51 | H | B | 0.84 | -0.30 | 4.53 | H | B | 0.82 | -0.20 | 4.60 | H | B | 0.85 | -0.24 | 4.52 |
| 1005 | H | E | 0.81 | 0.04  | 4.14 | H | E | 0.83 | 0.04  | 3.27 | H | E | 0.81 | -0.02 | 3.62 | H | E | 0.85 | 0.09  | 3.22 | H | E | 0.78 | 0.03  | 4.58 | H | E | 0.82 | 0.03  | 4.61 | H | E | 0.78 | 0.03  | 4.70 | H | E | 0.83 | 0.07  | 4.58 |
| 1006 | H | E | 0.75 | 0.21  | 4.16 | H | B | 0.78 | 0.17  | 3.32 | H | B | 0.79 | 0.16  | 3.63 | H | E | 0.80 | 0.24  | 3.24 | H | E | 0.75 | 0.18  | 4.51 | H | E | 0.77 | 0.23  | 4.59 | H | E | 0.75 | 0.30  | 4.62 | H | E | 0.76 | 0.24  | 4.60 |
| 1007 | H | E | 0.78 | 0.25  | 4.23 | H | E | 0.79 | 0.22  | 3.37 | H | E | 0.78 | 0.24  | 3.74 | H | E | 0.79 | 0.28  | 3.25 | H | E | 0.75 | 0.29  | 4.57 | H | E | 0.78 | 0.30  | 4.66 | H | E | 0.78 | 0.32  | 4.62 | H | E | 0.78 | 0.30  | 4.64 |
| 1008 | H | E | 0.75 | -0.00 | 4.25 | H | E | 0.76 | 0.01  | 3.40 | H | E | 0.75 | -0.00 | 3.75 | H | E | 0.78 | 0.09  | 3.27 | H | E | 0.72 | 0.04  | 4.64 | H | E | 0.75 | 0.03  | 4.71 | H | E | 0.75 | 0.06  | 4.67 | H | E | 0.75 | 0.05  | 4.67 |
| 1009 | C | B | 0.82 | -0.13 | 4.19 | C | B | 0.78 | -0.15 | 3.36 | C | B | 0.82 | -0.13 | 3.72 | C | B | 0.81 | -0.10 | 3.33 | C | B | 0.78 | -0.13 | 4.59 | C | B | 0.80 | -0.09 | 4.65 | C | B | 0.78 | -0.08 | 4.67 | C | B | 0.82 | -0.10 | 4.61 |
| 1010 | C | E |      |       |      |   |   |      |       |      |   |   |      |       |      |   |   |      |       |      |   |   |      |       |      |   |   |      |       |      |   |   |      |       |      |   |   |      |       |      |

|      |   |   |      |       |      |   |   |      |       |      |   |   |      |       |      |   |   |      |       |      |   |   |      |       |      |   |   |      |       |      |   |   |      |       |      |   |   |      |       |      |
|------|---|---|------|-------|------|---|---|------|-------|------|---|---|------|-------|------|---|---|------|-------|------|---|---|------|-------|------|---|---|------|-------|------|---|---|------|-------|------|---|---|------|-------|------|
| 1024 | H | B | 0.84 | -0.32 | 4.01 | H | B | 0.88 | -0.26 | 3.25 | H | B | 0.85 | -0.28 | 3.56 | H | B | 0.89 | -0.25 | 3.54 | H | B | 0.82 | -0.32 | 4.42 | H | B | 0.83 | -0.23 | 4.43 | H | B | 0.83 | -0.25 | 4.61 | H | B | 0.85 | -0.28 | 4.51 |
| 1025 | C | E | 0.85 | 0.04  | 3.99 | C | E | 0.88 | 0.16  | 3.25 | C | E | 0.85 | 0.11  | 3.62 | C | E | 0.89 | 0.14  | 3.65 | C | E | 0.83 | 0.06  | 4.41 | C | E | 0.84 | 0.19  | 4.49 | C | E | 0.85 | 0.14  | 4.57 | C | E | 0.86 | 0.13  | 4.65 |
| 1026 | C | E | 0.84 | 0.11  | 3.99 | C | E | 0.87 | 0.18  | 3.25 | C | E | 0.85 | 0.06  | 3.61 | C | E | 0.88 | 0.13  | 3.66 | C | E | 0.83 | 0.08  | 4.43 | C | E | 0.85 | 0.13  | 4.45 | C | E | 0.83 | 0.14  | 4.60 | C | E | 0.86 | 0.11  | 4.58 |
| 1027 | C | E | 0.85 | 0.16  | 3.92 | C | E | 0.87 | 0.25  | 3.21 | C | E | 0.85 | 0.15  | 3.54 | C | E | 0.88 | 0.24  | 3.68 | C | E | 0.83 | 0.17  | 4.40 | C | E | 0.85 | 0.19  | 4.43 | C | E | 0.84 | 0.22  | 4.57 | C | E | 0.86 | 0.17  | 4.56 |
| 1028 | C | E | 0.85 | -0.01 | 3.87 | C | E | 0.88 | 0.12  | 3.18 | C | E | 0.85 | 0.10  | 3.51 | C | E | 0.88 | 0.13  | 3.64 | C | E | 0.83 | -0.01 | 4.38 | C | E | 0.85 | 0.04  | 4.38 | C | E | 0.85 | 0.06  | 4.55 | C | E | 0.86 | 0.01  | 4.53 |
| 1029 | H | E | 0.87 | -0.18 | 3.72 | H | E | 0.88 | -0.21 | 3.06 | H | E | 0.88 | -0.16 | 3.34 | H | E | 0.88 | -0.14 | 3.51 | H | E | 0.85 | -0.26 | 4.22 | H | E | 0.88 | -0.23 | 4.22 | H | E | 0.85 | -0.21 | 4.44 | H | E | 0.89 | -0.22 | 4.35 |
| 1030 | H | E | 0.86 | -0.31 | 3.73 | H | E | 0.88 | -0.31 | 3.07 | H | E | 0.88 | -0.28 | 3.34 | H | E | 0.88 | -0.28 | 3.46 | H | E | 0.86 | -0.31 | 4.22 | H | E | 0.88 | -0.34 | 4.20 | H | E | 0.85 | -0.31 | 4.45 | H | E | 0.89 | -0.34 | 4.34 |
| 1031 | H | B | 0.86 | -0.58 | 3.81 | H | B | 0.88 | -0.60 | 3.11 | H | B | 0.87 | -0.59 | 3.42 | H | B | 0.88 | -0.60 | 3.48 | H | B | 0.85 | -0.56 | 4.26 | H | B | 0.86 | -0.65 | 4.27 | H | B | 0.84 | -0.60 | 4.49 | H | B | 0.88 | -0.64 | 4.39 |
| 1032 | H | B | 0.87 | -0.61 | 3.77 | H | B | 0.88 | -0.63 | 3.07 | H | B | 0.87 | -0.66 | 3.36 | H | B | 0.88 | -0.59 | 3.46 | H | B | 0.85 | -0.60 | 4.20 | H | B | 0.86 | -0.64 | 4.25 | H | B | 0.84 | -0.63 | 4.46 | H | B | 0.88 | -0.65 | 4.36 |
| 1033 | H | E | 0.86 | -0.59 | 3.70 | H | E | 0.88 | -0.59 | 3.02 | H | E | 0.86 | -0.59 | 3.27 | H | E | 0.88 | -0.57 | 3.39 | H | E | 0.84 | -0.59 | 4.18 | H | E | 0.85 | -0.61 | 4.21 | H | E | 0.83 | -0.63 | 4.44 | H | E | 0.87 | -0.64 | 4.31 |
| 1034 | H | B | 0.88 | -0.61 | 3.74 | H | B | 0.88 | -0.62 | 3.05 | H | B | 0.88 | -0.62 | 3.31 | H | B | 0.88 | -0.63 | 3.35 | H | B | 0.85 | -0.65 | 4.20 | H | B | 0.87 | -0.66 | 4.20 | H | B | 0.85 | -0.69 | 4.43 | H | B | 0.88 | -0.72 | 4.30 |
| 1035 | H | B | 0.86 | -0.76 | 3.83 | H | B | 0.86 | -0.83 | 3.12 | H | B | 0.87 | -0.77 | 3.39 | H | B | 0.86 | -0.83 | 3.41 | H | B | 0.84 | -0.80 | 4.25 | H | B | 0.85 | -0.80 | 4.28 | H | B | 0.84 | -0.83 | 4.46 | H | B | 0.87 | -0.82 | 4.37 |
| 1036 | H | B | 0.86 | -0.66 | 3.78 | H | B | 0.85 | -0.69 | 3.08 | H | B | 0.87 | -0.64 | 3.32 | H | B | 0.85 | -0.71 | 3.38 | H | B | 0.84 | -0.69 | 4.18 | H | B | 0.85 | -0.72 | 4.25 | H | B | 0.84 | -0.74 | 4.43 | H | B | 0.87 | -0.70 | 4.33 |
| 1037 | H | E | 0.86 | -0.55 | 3.74 | H | E | 0.85 | -0.56 | 3.04 | H | E | 0.87 | -0.52 | 3.26 | H | E | 0.85 | -0.56 | 3.30 | H | E | 0.84 | -0.57 | 4.16 | H | E | 0.85 | -0.56 | 4.21 | H | E | 0.84 | -0.61 | 4.41 | H | E | 0.87 | -0.54 | 4.29 |
| 1038 | H | B | 0.86 | -0.68 | 3.83 | H | B | 0.85 | -0.62 | 3.10 | H | B | 0.87 | -0.65 | 3.36 | H | B | 0.85 | -0.64 | 3.31 | H | B | 0.83 | -0.66 | 4.24 | H | B | 0.85 | -0.67 | 4.28 | H | B | 0.84 | -0.67 | 4.44 | H | B | 0.86 | -0.66 | 4.34 |
| 1039 | H | B | 0.86 | -0.69 | 3.88 | H | B | 0.85 | -0.72 | 3.13 | H | B | 0.87 | -0.67 | 3.41 | H | B | 0.85 | -0.71 | 3.34 | H | B | 0.83 | -0.70 | 4.23 | H | B | 0.85 | -0.69 | 4.32 | H | B | 0.84 | -0.74 | 4.45 | H | B | 0.86 | -0.68 | 4.38 |
| 1040 | H | E | 0.86 | -0.62 | 3.81 | H | E | 0.85 | -0.59 | 3.07 | H | E | 0.87 | -0.59 | 3.32 | H | E | 0.85 | -0.59 | 3.27 | H | E | 0.83 | -0.63 | 4.16 | H | B | 0.85 | -0.62 | 4.27 | H | B | 0.84 | -0.64 | 4.41 | H | E | 0.86 | -0.59 | 4.33 |
| 1041 | H | B | 0.86 | -0.53 | 3.82 | H | B | 0.85 | -0.55 | 3.07 | H | B | 0.87 | -0.53 | 3.32 | H | B | 0.86 | -0.54 | 3.20 | H | B | 0.83 | -0.56 | 4.19 | H | B | 0.85 | -0.54 | 4.27 | H | B | 0.84 | -0.57 | 4.41 | H | B | 0.86 | -0.55 | 4.32 |
| 1042 | H | B | 0.86 | -0.57 | 3.92 | H | B | 0.85 | -0.59 | 3.14 | H | B | 0.87 | -0.60 | 3.43 | H | B | 0.85 | -0.61 | 3.24 | H | B | 0.83 | -0.61 | 4.24 | H | B | 0.85 | -0.60 | 4.35 | H | B | 0.84 | -0.63 | 4.44 | H | B | 0.86 | -0.60 | 4.38 |
| 1043 | H | B | 0.86 | -0.48 | 3.93 | H | B | 0.86 | -0.51 | 3.14 | H | B | 0.87 | -0.51 | 3.45 | H | B | 0.85 | -0.50 | 3.26 | H | B | 0.83 | -0.52 | 4.21 | H | B | 0.85 | -0.50 | 4.36 | H | B | 0.84 | -0.52 | 4.44 | H | B | 0.85 | -0.48 | 4.41 |
| 1044 | H | E | 0.86 | -0.15 | 3.87 | H | E | 0.88 | -0.22 | 3.07 | H | E | 0.88 | -0.20 | 3.36 | H | E | 0.88 | -0.17 | 3.17 | H | E | 0.85 | -0.17 | 4.15 | H | E | 0.86 | -0.19 | 4.30 | H | E | 0.85 | -0.15 | 4.39 | H | E | 0.88 | -0.15 | 4.35 |
| 1045 | H | E | 0.85 | -0.07 | 3.94 | H | E | 0.87 | -0.12 | 3.16 | H | E | 0.87 | -0.13 | 3.43 | H | E | 0.87 | -0.09 | 3.15 | H | E | 0.83 | -0.06 | 4.23 | H | E | 0.85 | -0.13 | 4.36 | H | E | 0.85 | -0.11 | 4.50 | H | E | 0.86 | -0.10 | 4.40 |
| 1046 | C | B | 0.85 | -0.08 | 4.08 | C | B | 0.86 | -0.11 | 3.22 | C | B | 0.86 | -0.11 | 3.58 | C | B | 0.86 | -0.10 | 3.23 | C | B | 0.82 | -0.07 | 4.42 | C | B | 0.85 | -0.12 | 4.57 | C | B | 0.84 | -0.14 | 4.53 | C | B | 0.85 | -0.11 | 4.51 |
| 1047 | C | E | 0.82 | 0.14  | 4.11 | C | E | 0.82 | 0.08  | 3.32 | C | E | 0.82 | 0.12  | 3.69 | C | E | 0.83 | 0.12  | 3.35 | C | E | 0.79 | 0.14  | 4.43 | C | E | 0.82 | 0.12  | 4.62 | C | E | 0.81 | 0.09  | 4.64 | C | E | 0.82 | 0.12  | 4.65 |
| 1048 | C | E | 0.82 | 0.27  | 4.20 | C | E | 0.82 | 0.30  | 3.38 | C | E | 0.82 | 0.31  | 3.79 | C | E | 0.84 | 0.28  | 3.34 | C | E | 0.79 | 0.28  | 4.47 | C | E | 0.81 | 0.27  | 4.69 | C | E | 0.80 | 0.27  | 4.67 | C | E | 0.82 | 0.26  | 4.71 |
| 1049 | C | E | 0.79 | 0.26  | 4.24 | C | E | 0.80 | 0.29  | 3.42 | C | E | 0.81 | 0.31  | 3.83 | C | E | 0.82 | 0.26  | 3.39 | C | E | 0.77 | 0.29  | 4.54 | C | E | 0.78 | 0.32  | 4.75 | C | E | 0.77 | 0.26  | 4.72 | C | E | 0.79 | 0.27  | 4.74 |
| 1050 | C | B | 0.78 | 0.04  | 4.24 | C | B | 0.80 | 0.05  | 3.37 | C | B | 0.79 | 0.02  | 3.79 | C | B | 0.80 | 0.02  | 3.39 | C | B | 0.75 | 0.05  | 4.45 | C | B | 0.76 | 0.07  | 4.67 | C | B | 0.76 | 0.04  | 4.63 | C | B | 0.78 | 0.02  | 4.67 |
| 1051 | C | E | 0.70 | 0.12  | 4.41 | C | E | 0.67 | 0.17  | 3.58 | C | E | 0.68 | 0.12  | 4.02 | C | E | 0.68 | 0.16  | 3.60 | C | E | 0.65 | 0.18  | 4.67 | C | E | 0.65 | 0.13  | 4.95 | C | E | 0.65 | 0.12  | 4.86 | C | E | 0.67 | 0.11  | 4.94 |
| 1052 | H | E | 0.75 | 0.18  | 4.29 | H | E | 0.75 | 0.21  | 3.45 | H | E | 0.74 | 0.23  | 3.89 | H | E | 0.73 | 0.26  | 3.53 | H | E | 0.69 | 0.23  | 4.51 | H | E | 0.72 | 0.24  | 4.77 | H | E | 0.72 | 0.25  | 4.70 | H | E | 0.74 | 0.23  | 4.78 |
| 1053 | H | E | 0.77 | 0.17  | 4.30 | H | E | 0.75 | 0.23  | 3.49 | H | E | 0.78 | 0.17  | 3.90 | H | E | 0.72 | 0.22  | 3.62 | H | E | 0.72 | 0.18  | 4.49 | H | E | 0.76 | 0.18  | 4.75 | H | E | 0.75 | 0.19  | 4.69 | H | E | 0.77 | 0.22  | 4.78 |
| 1054 | H | E | 0.81 | -0.15 | 4.21 | H | E | 0.80 | -0.15 | 3.40 | H | E | 0.82 | -0.19 | 3.80 | H | E | 0.79 | -0.14 | 3.54 | H | E | 0.76 | -0.19 | 4.44 | H | E | 0.81 | -0.16 | 4.64 | H | E | 0.79 | -0.14 | 4.62 | H | E | 0.81 | -0.15 | 4.68 |
| 1055 | H | B | 0.82 | -0.51 | 4.11 | H | B | 0.82 | -0.47 | 3.31 | H | B | 0.85 | -0.54 | 3.67 | H | B | 0.81 | -0.53 | 3.48 | H | B | 0.79 | -0.53 | 4.33 | H | B | 0.83 | -0.48 | 4.53 | H | B | 0.81 | -0.49 | 4.55 | H | B | 0.81 | -0.53 | 4.61 |
| 1056 | H | B | 0.85 | -0.37 | 4.10 | H | B | 0.83 | -0.32 | 3.33 | H | E | 0.85 | -0.40 | 3.68 | H | B | 0.83 | -0.37 | 3.51 | H | B | 0.82 | -0.41 | 4.29 | H | B | 0.84 | -0.38 | 4.55 | H | B | 0.82 | -0.34 | 4.53 | H | E | 0.83 | -0.39 | 4.62 |
| 1057 | H | E | 0.85 | -0.34 | 4.11 | H | E | 0.86 | -0.28 | 3.32 | H | E | 0.85 | -0.33 | 3.71 | H | E | 0.86 | -0.33 | 3.54 | H | E | 0.82 | -0.31 | 4.34 | H | E | 0.85 | -0.32 | 4.56 | H | E | 0.83 | -0.30 | 4.54 | H | E | 0.85 | -0.32 | 4.61 |
| 1058 | H | B | 0.85 | -0.56 | 4.02 | H | B | 0.85 | -0.55 | 3.25 | H | B | 0.85 | -0.56 | 3.61 | H | B | 0.87 | -0.58 | 3.48 | H | B | 0.82 | -0.57 | 4.30 | H | B | 0.84 | -0.53 | 4.49 | H | B | 0.83 | -0.52 | 4.51 | H | B | 0.85 | -0.56 | 4.53 |
| 1059 | H | B | 0.85 | -0.58 | 3.98 | H | B | 0.85 | -0.54 | 3.23 | H | B | 0.85 | -0.57 | 3.55 | H | B | 0.87 | -0.60 | 3.47 | H | B | 0.82 | -0.61 | 4.25 | H | B | 0.84 | -0.53 | 4.47 | H | B | 0.83 | -0.55 | 4.48 | H | B | 0.85 | -0.57 | 4.52 |
| 1060 | H | B | 0.85 | -0.42 | 4.02 | H | B | 0.84 | -0.44 | 3.27 | H | B | 0.84 | -0.41 | 3.61 | H | B | 0.85 | -0.44 | 3.57 | H | B | 0.80 | -0.45 | 4.32 | H | B | 0.82 | -0.40 | 4.54 | H | B | 0.82 | -0.44 | 4.52 | H | B | 0.82 | -0.44 | 4.60 |
| 1061 | H | E | 0.84 | -0.42 | 3.99 | H | E | 0.84 | -0.43 | 3.25 | H | E | 0.84 | -0.40 | 3.58 | H | E | 0.84 | -0.46 | 3.58 | H | E | 0.79 | -0.42 | 4.34 | H | E | 0.82 | -0.38 | 4.49 | H | E | 0.82 | -0.39 | 4.52 | H | E | 0.83 | -0.42 | 4.56 |
| 1062 | H | B | 0.85 | -0.54 | 3.89 | H | B | 0.85 | -0.64 | 3.16 | H | B | 0.84 | -0.52 | 3.46 | H | B | 0.84 | -0.53 | 3.51 | H | B | 0.79 | -0.59 | 4.27 | H | B | 0.82 | -0.53 | 4.42 | H | B | 0.82 | -0.55 | 4.48 | H | B | 0.83 | -0.54 | 4.48 |
| 1063 | H | B | 0.86 | -0.59 | 3.86 | H | B | 0.86 | -0.59 | 3.16 | H | B | 0.85 | -0.56 | 3.43 | H | B | 0.87 | -0.55 | 3.52 | H | B | 0.82 | -0.62 | 4.24 | H | B | 0.84 | -0.55 | 4.42 | H | B | 0.83 | -0.59 | 4.45 | H | B | 0.85 | -0.55 |      |

|      |   |   |      |       |      |   |   |      |       |      |   |   |      |       |      |   |   |      |       |      |   |   |      |       |      |   |   |      |       |      |   |   |      |       |      |   |   |      |       |      |
|------|---|---|------|-------|------|---|---|------|-------|------|---|---|------|-------|------|---|---|------|-------|------|---|---|------|-------|------|---|---|------|-------|------|---|---|------|-------|------|---|---|------|-------|------|
| 1078 | H | B | 0.88 | -0.73 | 3.68 | H | B | 0.86 | -0.71 | 3.00 | H | B | 0.85 | -0.73 | 3.20 | H | B | 0.89 | -0.72 | 3.28 | H | B | 0.83 | -0.74 | 4.05 | H | B | 0.86 | -0.72 | 4.22 | H | B | 0.86 | -0.74 | 4.32 | H | B | 0.88 | -0.70 | 4.27 |
| 1079 | H | E | 0.86 | -0.54 | 3.69 | H | E | 0.88 | -0.55 | 2.97 | H | E | 0.86 | -0.55 | 3.19 | H | E | 0.89 | -0.55 | 3.20 | H | E | 0.84 | -0.55 | 4.03 | H | E | 0.85 | -0.53 | 4.21 | H | E | 0.85 | -0.56 | 4.34 | H | E | 0.86 | -0.52 | 4.28 |
| 1080 | H | B | 0.86 | -0.77 | 3.78 | H | B | 0.88 | -0.80 | 3.04 | H | B | 0.86 | -0.78 | 3.29 | H | B | 0.89 | -0.79 | 3.24 | H | B | 0.84 | -0.79 | 4.09 | H | B | 0.85 | -0.77 | 4.27 | H | B | 0.85 | -0.81 | 4.38 | H | B | 0.86 | -0.76 | 4.33 |
| 1081 | H | B | 0.87 | -0.78 | 3.80 | H | B | 0.87 | -0.82 | 3.08 | H | B | 0.87 | -0.80 | 3.33 | H | B | 0.88 | -0.80 | 3.31 | H | B | 0.85 | -0.79 | 4.08 | H | B | 0.85 | -0.79 | 4.30 | H | B | 0.85 | -0.81 | 4.37 | H | B | 0.87 | -0.79 | 4.36 |
| 1082 | H | B | 0.85 | -0.64 | 3.81 | H | B | 0.87 | -0.65 | 3.06 | H | B | 0.87 | -0.67 | 3.32 | H | B | 0.86 | -0.66 | 3.26 | H | E | 0.85 | -0.62 | 4.05 | H | B | 0.85 | -0.63 | 4.29 | H | B | 0.84 | -0.67 | 4.37 | H | B | 0.85 | -0.64 | 4.37 |
| 1083 | H | B | 0.85 | -0.58 | 3.86 | H | B | 0.86 | -0.56 | 3.09 | H | B | 0.87 | -0.58 | 3.36 | H | B | 0.86 | -0.57 | 3.23 | H | B | 0.85 | -0.57 | 4.08 | H | B | 0.85 | -0.57 | 4.30 | H | B | 0.84 | -0.60 | 4.39 | H | B | 0.85 | -0.57 | 4.38 |
| 1084 | H | B | 0.85 | -0.67 | 3.94 | H | B | 0.86 | -0.67 | 3.15 | H | B | 0.86 | -0.68 | 3.47 | H | B | 0.86 | -0.67 | 3.30 | H | B | 0.84 | -0.65 | 4.14 | H | B | 0.84 | -0.70 | 4.39 | H | B | 0.83 | -0.70 | 4.43 | H | B | 0.85 | -0.66 | 4.45 |
| 1085 | H | B | 0.82 | -0.57 | 3.97 | H | B | 0.83 | -0.58 | 3.19 | H | B | 0.81 | -0.60 | 3.52 | H | B | 0.85 | -0.62 | 3.31 | H | B | 0.80 | -0.58 | 4.17 | H | B | 0.82 | -0.62 | 4.43 | H | B | 0.81 | -0.62 | 4.45 | H | B | 0.82 | -0.56 | 4.50 |
| 1086 | H | E | 0.78 | -0.25 | 4.03 | H | E | 0.81 | -0.23 | 3.21 | H | E | 0.78 | -0.26 | 3.55 | H | E | 0.82 | -0.27 | 3.27 | H | E | 0.76 | -0.25 | 4.22 | H | E | 0.78 | -0.27 | 4.47 | H | E | 0.77 | -0.29 | 4.50 | H | E | 0.78 | -0.26 | 4.55 |
| 1087 | H | E | 0.76 | -0.20 | 4.12 | H | E | 0.80 | -0.12 | 3.27 | H | B | 0.77 | -0.30 | 3.66 | H | B | 0.80 | -0.27 | 3.32 | H | E | 0.75 | -0.20 | 4.31 | H | E | 0.76 | -0.22 | 4.56 | H | E | 0.75 | -0.26 | 4.56 | H | E | 0.77 | -0.26 | 4.62 |
| 1088 | H | B | 0.78 | -0.13 | 4.17 | H | B | 0.81 | -0.04 | 3.33 | H | B | 0.78 | -0.15 | 3.73 | H | B | 0.80 | -0.11 | 3.45 | H | B | 0.76 | -0.11 | 4.33 | H | B | 0.77 | -0.03 | 4.64 | H | B | 0.77 | -0.11 | 4.59 | H | B | 0.78 | -0.15 | 4.75 |
| 1089 | C | E | 0.76 | -0.14 | 4.19 | C | E | 0.78 | -0.05 | 3.37 | C | E | 0.78 | -0.10 | 3.74 | C | E | 0.78 | -0.08 | 3.45 | C | E | 0.76 | -0.10 | 4.35 | C | E | 0.78 | -0.09 | 4.65 | C | E | 0.76 | -0.14 | 4.62 | C | E | 0.78 | -0.18 | 4.72 |
| 1090 | H | E | 0.81 | 0.05  | 4.05 | H | E | 0.82 | 0.11  | 3.29 | H | E | 0.83 | 0.05  | 3.60 | H | E | 0.82 | 0.07  | 3.40 | C | E | 0.80 | 0.03  | 4.21 | H | E | 0.81 | 0.10  | 4.52 | H | B | 0.80 | -0.00 | 4.49 | H | B | 0.82 | -0.06 | 4.60 |
| 1091 | H | E | 0.81 | 0.13  | 4.09 | H | E | 0.84 | 0.09  | 3.30 | H | E | 0.85 | 0.10  | 3.64 | H | E | 0.85 | 0.10  | 3.44 | H | E | 0.82 | 0.11  | 4.21 | H | E | 0.82 | 0.15  | 4.56 | H | E | 0.80 | 0.08  | 4.49 | H | E | 0.84 | 0.03  | 4.61 |
| 1092 | H | E | 0.83 | -0.11 | 4.09 | H | E | 0.84 | -0.11 | 3.32 | H | E | 0.86 | -0.04 | 3.65 | H | E | 0.84 | -0.06 | 3.49 | H | E | 0.82 | -0.12 | 4.22 | H | E | 0.82 | -0.07 | 4.58 | H | E | 0.79 | -0.07 | 4.53 | H | E | 0.85 | -0.13 | 4.60 |
| 1093 | H | B | 0.82 | -0.41 | 4.04 | H | B | 0.83 | -0.38 | 3.29 | H | B | 0.85 | -0.35 | 3.59 | H | B | 0.82 | -0.36 | 3.51 | H | B | 0.81 | -0.41 | 4.26 | H | B | 0.81 | -0.37 | 4.58 | H | B | 0.78 | -0.40 | 4.56 | H | B | 0.82 | -0.38 | 4.63 |
| 1094 | H | B | 0.82 | -0.42 | 4.00 | H | B | 0.82 | -0.46 | 3.28 | H | B | 0.85 | -0.40 | 3.54 | H | B | 0.82 | -0.39 | 3.52 | H | B | 0.81 | -0.45 | 4.24 | H | B | 0.80 | -0.38 | 4.58 | H | B | 0.79 | -0.40 | 4.53 | H | B | 0.83 | -0.41 | 4.60 |
| 1095 | H | E | 0.82 | -0.21 | 4.07 | H | E | 0.81 | -0.24 | 3.37 | H | E | 0.83 | -0.18 | 3.64 | H | E | 0.82 | -0.21 | 3.60 | H | E | 0.81 | -0.22 | 4.30 | H | E | 0.78 | -0.20 | 4.69 | H | E | 0.79 | -0.24 | 4.56 | H | E | 0.83 | -0.18 | 4.68 |
| 1096 | H | B | 0.81 | -0.37 | 4.07 | H | B | 0.80 | -0.40 | 3.35 | H | B | 0.82 | -0.34 | 3.64 | H | B | 0.79 | -0.36 | 3.64 | H | B | 0.80 | -0.43 | 4.32 | H | B | 0.78 | -0.38 | 4.68 | H | B | 0.78 | -0.42 | 4.58 | H | B | 0.82 | -0.39 | 4.68 |
| 1097 | H | B | 0.81 | -0.53 | 3.97 | H | B | 0.80 | -0.58 | 3.33 | H | B | 0.82 | -0.52 | 3.52 | H | B | 0.80 | -0.51 | 3.60 | H | B | 0.79 | -0.55 | 4.28 | H | B | 0.79 | -0.54 | 4.59 | H | B | 0.79 | -0.57 | 4.53 | H | B | 0.82 | -0.56 | 4.61 |
| 1098 | H | B | 0.75 | -0.37 | 4.12 | H | B | 0.78 | -0.39 | 3.43 | H | B | 0.77 | -0.34 | 3.67 | H | B | 0.77 | -0.32 | 3.72 | H | B | 0.75 | -0.34 | 4.49 | H | B | 0.75 | -0.34 | 4.82 | H | B | 0.75 | -0.39 | 4.71 | H | B | 0.78 | -0.38 | 4.82 |
| 1099 | H | E | 0.77 | -0.12 | 4.15 | H | E | 0.82 | -0.14 | 3.43 | H | E | 0.77 | -0.09 | 3.72 | H | E | 0.79 | -0.11 | 3.77 | H | E | 0.75 | -0.07 | 4.54 | H | E | 0.78 | -0.09 | 4.83 | H | E | 0.75 | -0.13 | 4.74 | H | E | 0.78 | -0.11 | 4.85 |
| 1100 | H | E | 0.76 | -0.21 | 4.18 | H | E | 0.80 | -0.26 | 3.42 | H | E | 0.76 | -0.22 | 3.73 | H | E | 0.79 | -0.23 | 3.82 | H | E | 0.72 | -0.22 | 4.69 | H | E | 0.75 | -0.20 | 4.92 | H | E | 0.73 | -0.21 | 4.88 | H | E | 0.77 | -0.22 | 4.94 |
| 1101 | H | B | 0.72 | -0.31 | 4.14 | H | B | 0.77 | -0.31 | 3.40 | H | B | 0.72 | -0.30 | 3.67 | H | B | 0.76 | -0.28 | 3.86 | H | B | 0.69 | -0.27 | 4.72 | H | B | 0.71 | -0.24 | 4.94 | H | B | 0.70 | -0.27 | 4.90 | H | B | 0.73 | -0.27 | 4.95 |
| 1102 | H | E | 0.73 | 0.07  | 4.17 | H | E | 0.78 | 0.05  | 3.44 | H | E | 0.73 | 0.08  | 3.70 | H | E | 0.76 | 0.13  | 3.98 | H | E | 0.71 | 0.09  | 4.76 | H | E | 0.70 | 0.13  | 5.03 | H | E | 0.71 | -0.14 | 4.91 | H | E | 0.72 | 0.10  | 5.01 |
| 1103 | C | E | 0.71 | 0.06  | 4.16 | C | B | 0.75 | 0.10  | 3.44 | H | B | 0.71 | 0.07  | 3.74 | H | E | 0.73 | 0.12  | 4.05 | C | E | 0.69 | 0.04  | 4.76 | C | B | 0.68 | 0.09  | 5.03 | C | B | 0.70 | 0.16  | 4.87 | C | B | 0.71 | 0.06  | 5.03 |
| 1104 | C | E | 0.67 | 0.28  | 4.12 | C | E | 0.71 | 0.35  | 3.41 | H | E | 0.68 | 0.33  | 3.68 | H | E | 0.71 | 0.34  | 4.00 | C | E | 0.68 | 0.30  | 4.72 | C | E | 0.66 | 0.36  | 5.00 | C | E | 0.65 | 0.41  | 4.92 | C | E | 0.67 | 0.28  | 5.02 |
| 1105 | C | E | 0.71 | 0.26  | 4.00 | H | E | 0.75 | 0.19  | 3.34 | H | E | 0.73 | 0.21  | 3.54 | H | E | 0.73 | 0.28  | 4.00 | C | E | 0.68 | 0.25  | 4.73 | C | E | 0.69 | 0.30  | 4.91 | C | E | 0.68 | 0.33  | 4.88 | C | E | 0.72 | 0.29  | 4.89 |
| 1106 | H | E | 0.71 | -0.15 | 3.95 | H | E | 0.72 | -0.13 | 3.28 | H | E | 0.71 | -0.14 | 3.44 | H | E | 0.73 | -0.12 | 3.87 | H | E | 0.68 | -0.14 | 4.70 | H | E | 0.69 | -0.04 | 4.92 | H | E | 0.68 | -0.07 | 4.88 | H | E | 0.71 | -0.12 | 4.88 |
| 1107 | H | B | 0.76 | -0.41 | 3.79 | H | E | 0.76 | -0.34 | 3.19 | H | E | 0.76 | -0.36 | 3.28 | H | B | 0.76 | -0.39 | 3.72 | H | B | 0.74 | -0.39 | 4.43 | H | E | 0.75 | -0.32 | 4.66 | H | B | 0.74 | -0.36 | 4.64 | H | B | 0.76 | -0.38 | 4.65 |
| 1108 | H | B | 0.78 | -0.54 | 3.82 | H | B | 0.78 | -0.47 | 3.19 | H | B | 0.78 | -0.49 | 3.32 | H | B | 0.78 | -0.53 | 3.72 | H | B | 0.75 | -0.53 | 4.36 | H | B | 0.76 | -0.48 | 4.55 | H | B | 0.75 | -0.51 | 4.65 | H | B | 0.77 | -0.51 | 4.57 |
| 1109 | H | B | 0.85 | -0.66 | 3.72 | H | B | 0.86 | -0.63 | 3.08 | H | B | 0.86 | -0.64 | 3.22 | H | B | 0.85 | -0.69 | 3.57 | H | B | 0.83 | -0.66 | 4.20 | H | B | 0.84 | -0.64 | 4.42 | H | B | 0.83 | -0.65 | 4.42 | H | B | 0.85 | -0.65 | 4.44 |
| 1110 | H | B | 0.85 | -0.75 | 3.68 | H | B | 0.86 | -0.77 | 3.03 | H | B | 0.85 | -0.70 | 3.16 | H | B | 0.85 | -0.76 | 3.49 | H | B | 0.82 | -0.74 | 4.14 | H | B | 0.83 | -0.75 | 4.39 | H | B | 0.82 | -0.75 | 4.39 | H | B | 0.84 | -0.73 | 4.41 |
| 1111 | H | B | 0.85 | -0.84 | 3.64 | H | B | 0.87 | -0.83 | 2.97 | H | B | 0.86 | -0.79 | 3.13 | H | B | 0.86 | -0.81 | 3.40 | H | B | 0.84 | -0.84 | 4.05 | H | B | 0.84 | -0.84 | 4.28 | H | B | 0.83 | -0.86 | 4.34 | H | B | 0.85 | -0.83 | 4.32 |
| 1112 | H | B | 0.85 | -0.88 | 3.72 | H | B | 0.86 | -0.89 | 3.06 | H | B | 0.86 | -0.83 | 3.23 | H | B | 0.86 | -0.86 | 3.44 | H | B | 0.84 | -0.87 | 4.09 | H | B | 0.84 | -0.87 | 4.35 | H | B | 0.83 | -0.91 | 4.36 | H | B | 0.85 | -0.89 | 4.38 |
| 1113 | H | B | 0.86 | -0.83 | 3.69 | H | B | 0.87 | -0.86 | 3.04 | H | B | 0.87 | -0.81 | 3.20 | H | B | 0.86 | -0.82 | 3.41 | H | B | 0.85 | -0.85 | 4.04 | H | B | 0.85 | -0.86 | 4.34 | H | B | 0.85 | -0.88 | 4.31 | H | B | 0.85 | -0.85 | 4.36 |
| 1114 | H | B | 0.86 | -0.80 | 3.65 | H | B | 0.87 | -0.80 | 2.98 | H | B | 0.87 | -0.78 | 3.14 | H | B | 0.86 | -0.80 | 3.33 | H | B | 0.85 | -0.80 | 3.99 | H | B | 0.85 | -0.81 | 4.27 | H | B | 0.85 | -0.83 | 4.30 | H | B | 0.85 | -0.81 | 4.31 |
| 1115 | H | B | 0.85 | -0.86 | 3.74 | H | B | 0.87 | -0.85 | 3.04 | H | B | 0.88 | -0.84 | 3.23 | H | B | 0.86 | -0.86 | 3.35 | H | B | 0.85 | -0.88 | 4.03 | H | B | 0.84 | -0.86 | 4.32 | H | B | 0.84 | -0.86 | 4.34 | H | B | 0.85 | -0.86 | 4.37 |
| 1116 | H | B | 0.86 | -0.82 | 3.77 | H | B | 0.87 | -0.82 | 3.08 | H | B | 0.88 | -0.81 | 3.29 | H | B | 0.86 | -0.84 | 3.37 | H | B | 0.84 | -0.84 | 4.06 | H | B | 0.85 | -0.83 | 4.35 | H | B | 0.85 | -0.81 | 4.33 | H | B | 0.85 | -0.83 | 4.40 |
| 1117 | H | B | 0.86 | -0.72 | 3.72 | H | B | 0.86 | -0.72 | 3.04 | H | B | 0.88 | -0.72 | 3.22 | H | B | 0.86 | -0.75 | 3.29 | H | B | 0.84 | -0.72 | 4.01 | H | B | 0.85 | -0.75 | 4.30 | H | B | 0.85 | -0.75 | 4.30 | H | B | 0.85 | -0.74 |      |



|      |   |   |      |       |      |   |   |      |       |      |   |   |      |       |      |   |   |      |       |      |   |   |      |       |      |   |   |      |       |      |   |   |      |         |      |   |   |      |       |      |
|------|---|---|------|-------|------|---|---|------|-------|------|---|---|------|-------|------|---|---|------|-------|------|---|---|------|-------|------|---|---|------|-------|------|---|---|------|---------|------|---|---|------|-------|------|
| 1132 | H | B | 0.87 | -0.71 | 3.91 | H | B | 0.88 | -0.71 | 3.22 | H | B | 0.89 | -0.70 | 3.46 | H | B | 0.88 | -0.68 | 3.47 | H | B | 0.85 | -0.70 | 4.14 | H | B | 0.87 | -0.69 | 4.47 | H | B | 0.87 | -0.70   | 4.32 | H | B | 0.88 | -0.71 | 4.51 |
| 1133 | H | B | 0.87 | -0.43 | 3.92 | H | B | 0.88 | -0.40 | 3.26 | H | B | 0.89 | -0.40 | 3.49 | H | B | 0.88 | -0.39 | 3.50 | H | B | 0.85 | -0.38 | 4.18 | H | B | 0.87 | -0.40 | 4.50 | H | B | 0.86 | -0.39   | 4.33 | H | B | 0.88 | -0.41 | 4.54 |
| 1134 | H | E | 0.87 | -0.26 | 4.00 | H | E | 0.88 | -0.23 | 3.38 | H | E | 0.89 | -0.24 | 3.57 | H | E | 0.88 | -0.22 | 3.57 | H | E | 0.85 | -0.24 | 4.24 | H | E | 0.87 | -0.22 | 4.57 | H | E | 0.86 | -0.24   | 4.37 | H | E | 0.88 | -0.26 | 4.62 |
| 1135 | H | E | 0.87 | -0.18 | 3.95 | H | E | 0.88 | -0.17 | 3.34 | H | E | 0.88 | -0.19 | 3.51 | H | E | 0.88 | -0.20 | 3.59 | H | E | 0.85 | -0.18 | 4.23 | H | E | 0.87 | -0.19 | 4.56 | H | E | 0.87 | -0.20   | 4.36 | H | E | 0.88 | -0.19 | 4.59 |
| 1136 | C | B | 0.86 | -0.10 | 3.98 | C | B | 0.89 | -0.16 | 3.28 | C | B | 0.89 | -0.11 | 3.52 | C | B | 0.89 | -0.14 | 3.66 | C | B | 0.85 | -0.11 | 4.33 | C | B | 0.86 | -0.15 | 4.68 | C | B | 0.85 | -0.15   | 4.47 | C | B | 0.87 | -0.13 | 4.69 |
| 1137 | C | E | 0.86 | 0.05  | 4.02 | C | E | 0.90 | 0.05  | 3.36 | C | E | 0.88 | 0.07  | 3.58 | C | E | 0.90 | 0.03  | 3.69 | C | E | 0.85 | 0.06  | 4.35 | C | E | 0.86 | 0.09  | 4.69 | C | E | 0.85 | 0.06    | 4.44 | C | E | 0.87 | 0.07  | 4.71 |
| 1138 | C | B | 0.85 | 0.10  | 4.03 | C | B | 0.89 | 0.09  | 3.37 | C | B | 0.88 | 0.10  | 3.57 | C | B | 0.89 | 0.03  | 3.74 | C | B | 0.85 | 0.13  | 4.38 | C | B | 0.85 | 0.14  | 4.74 | C | B | 0.84 | 0.12    | 4.48 | C | B | 0.85 | 0.12  | 4.74 |
| 1139 | C | E | 0.86 | 0.42  | 4.00 | C | E | 0.89 | 0.31  | 3.36 | C | E | 0.88 | 0.41  | 3.53 | C | E | 0.90 | 0.37  | 3.79 | C | E | 0.85 | 0.42  | 4.41 | C | E | 0.86 | 0.43  | 4.74 | C | E | 0.85 | 0.44    | 4.46 | C | E | 0.87 | 0.43  | 4.72 |
| 1140 | C | E | 0.84 | 0.24  | 3.95 | C | E | 0.87 | 0.25  | 3.32 | C | E | 0.85 | 0.32  | 3.48 | C | E | 0.88 | 0.24  | 3.77 | C | E | 0.84 | 0.28  | 4.38 | C | E | 0.85 | 0.31  | 4.69 | C | E | 0.84 | 0.28    | 4.44 | C | E | 0.85 | 0.28  | 4.68 |
| 1141 | H | E | 0.84 | -0.01 | 3.83 | H | E | 0.88 | -0.02 | 3.21 | H | E | 0.86 | 0.03  | 3.33 | H | E | 0.89 | -0.02 | 3.68 | H | E | 0.85 | 0.04  | 4.26 | H | E | 0.85 | 0.05  | 4.57 | H | E | 0.84 | -0.01   | 4.34 | H | E | 0.85 | 0.02  | 4.54 |
| 1142 | H | E | 0.86 | 0.00  | 3.75 | H | E | 0.88 | -0.01 | 3.13 | H | E | 0.87 | 0.05  | 3.25 | H | E | 0.90 | -0.01 | 3.61 | H | E | 0.86 | 0.03  | 4.19 | H | E | 0.87 | 0.05  | 4.48 | H | E | 0.85 | -0.01   | 4.32 | H | E | 0.88 | 0.03  | 4.45 |
| 1143 | H | B | 0.86 | -0.47 | 3.79 | H | B | 0.88 | -0.48 | 3.15 | H | B | 0.87 | -0.46 | 3.32 | H | B | 0.90 | -0.51 | 3.58 | H | B | 0.86 | -0.49 | 4.17 | H | B | 0.87 | -0.44 | 4.48 | H | B | 0.85 | -0.49   | 4.34 | H | B | 0.87 | -0.47 | 4.48 |
| 1144 | H | B | 0.86 | -0.58 | 3.80 | H | B | 0.88 | -0.59 | 3.17 | H | B | 0.88 | -0.54 | 3.32 | H | B | 0.90 | -0.58 | 3.57 | H | B | 0.86 | -0.55 | 4.17 | H | B | 0.87 | -0.53 | 4.49 | H | B | 0.85 | -0.58   | 4.32 | H | B | 0.87 | -0.55 | 4.49 |
| 1145 | H | B | 0.86 | -0.61 | 3.70 | H | B | 0.88 | -0.71 | 3.10 | H | B | 0.88 | -0.57 | 3.21 | H | B | 0.90 | -0.60 | 3.51 | H | B | 0.86 | -0.58 | 4.12 | H | B | 0.87 | -0.58 | 4.43 | H | B | 0.85 | -0.60   | 4.28 | H | B | 0.87 | -0.56 | 4.42 |
| 1146 | H | B | 0.86 | -0.76 | 3.71 | H | B | 0.88 | -0.80 | 3.07 | H | B | 0.88 | -0.70 | 3.21 | H | B | 0.90 | -0.75 | 3.47 | H | B | 0.86 | -0.73 | 4.09 | H | B | 0.86 | -0.72 | 4.40 | H | B | 0.85 | -0.76   | 4.29 | H | B | 0.87 | -0.72 | 4.40 |
| 1147 | H | B | 0.88 | -0.87 | 3.75 | H | B | 0.88 | -0.94 | 3.12 | H | B | 0.88 | -0.85 | 3.28 | H | B | 0.90 | -0.90 | 3.45 | H | B | 0.87 | -0.88 | 4.08 | H | B | 0.88 | -0.86 | 4.40 | H | B | 0.86 | -0.91   | 4.28 | H | B | 0.88 | -0.87 | 4.41 |
| 1148 | H | B | 0.88 | -0.79 | 3.69 | H | B | 0.88 | -0.83 | 3.09 | H | B | 0.88 | -0.74 | 3.22 | H | B | 0.90 | -0.80 | 3.42 | H | B | 0.87 | -0.77 | 4.06 | H | B | 0.88 | -0.76 | 4.37 | H | B | 0.86 | -0.82   | 4.25 | H | B | 0.88 | -0.77 | 4.38 |
| 1149 | H | E | 0.88 | -0.74 | 3.62 | H | E | 0.88 | -0.80 | 3.01 | H | E | 0.88 | -0.69 | 3.13 | H | E | 0.90 | -0.77 | 3.36 | H | E | 0.87 | -0.75 | 4.00 | H | E | 0.88 | -0.73 | 4.31 | H | E | 0.86 | -0.78   | 4.23 | H | E | 0.88 | -0.74 | 4.31 |
| 1150 | H | B | 0.88 | -0.89 | 3.68 | H | B | 0.88 | -0.98 | 3.05 | H | B | 0.88 | -0.87 | 3.20 | H | B | 0.90 | -0.94 | 3.34 | H | B | 0.87 | -0.93 | 4.00 | H | B | 0.88 | -0.91 | 4.31 | H | B | 0.86 | -0.93   | 4.26 | H | B | 0.88 | -0.91 | 4.34 |
| 1151 | H | B | 0.88 | -0.81 | 3.69 | H | B | 0.88 | -0.91 | 3.06 | H | B | 0.88 | -0.82 | 3.23 | H | B | 0.90 | -0.88 | 3.31 | H | B | 0.87 | -0.83 | 4.00 | H | B | 0.88 | -0.83 | 4.31 | H | B | 0.86 | -0.88   | 4.24 | H | B | 0.88 | -0.84 | 4.35 |
| 1152 | H | B | 0.88 | -0.62 | 3.60 | H | B | 0.88 | -0.67 | 2.99 | H | B | 0.88 | -0.64 | 3.12 | H | B | 0.90 | -0.66 | 3.27 | H | B | 0.87 | -0.63 | 3.95 | H | B | 0.88 | -0.63 | 4.26 | H | B | 0.86 | -0.65   | 4.21 | H | B | 0.88 | -0.61 | 4.29 |
| 1153 | H | B | 0.87 | -0.53 | 3.59 | H | B | 0.87 | -0.61 | 2.96 | H | B | 0.88 | -0.55 | 3.08 | H | B | 0.89 | -0.57 | 3.23 | H | B | 0.86 | -0.55 | 3.93 | H | B | 0.87 | -0.54 | 4.22 | H | B | 0.86 | -0.57   | 4.22 | H | B | 0.88 | -0.54 | 4.26 |
| 1154 | H | B | 0.86 | -0.66 | 3.68 | H | B | 0.87 | -0.72 | 3.02 | H | B | 0.89 | -0.61 | 3.18 | H | B | 0.88 | -0.68 | 3.24 | H | B | 0.86 | -0.67 | 3.96 | H | B | 0.86 | -0.65 | 4.27 | H | B | 0.86 | -0.71   | 4.24 | H | B | 0.87 | -0.67 | 4.32 |
| 1155 | H | B | 0.87 | -0.56 | 3.66 | H | B | 0.87 | -0.62 | 3.01 | H | B | 0.89 | -0.50 | 3.18 | H | B | 0.89 | -0.60 | 3.19 | H | B | 0.86 | -0.58 | 3.95 | H | B | 0.87 | -0.58 | 4.25 | H | B | 0.86 | -0.65   | 4.21 | H | B | 0.88 | -0.59 | 4.31 |
| 1156 | H | E | 0.87 | -0.30 | 3.57 | H | E | 0.87 | -0.34 | 2.94 | H | E | 0.89 | -0.26 | 3.08 | H | E | 0.89 | -0.35 | 3.14 | H | E | 0.86 | -0.33 | 3.89 | H | E | 0.87 | -0.31 | 4.19 | H | E | 0.86 | -0.37   | 4.19 | H | E | 0.88 | -0.32 | 4.25 |
| 1157 | H | B | 0.88 | -0.27 | 3.61 | H | B | 0.87 | -0.34 | 2.95 | H | B | 0.89 | -0.22 | 3.12 | H | B | 0.90 | -0.28 | 3.12 | H | B | 0.87 | -0.31 | 3.90 | H | B | 0.88 | -0.22 | 4.18 | H | B | 0.87 | -0.33   | 4.21 | H | B | 0.88 | -0.26 | 4.25 |
| 1158 | H | B | 0.87 | -0.27 | 3.70 | H | B | 0.86 | -0.30 | 3.02 | H | B | 0.88 | -0.25 | 3.23 | H | B | 0.89 | -0.26 | 3.13 | H | B | 0.86 | -0.32 | 3.95 | H | B | 0.86 | -0.21 | 4.24 | H | B | 0.85 | -0.28   | 4.25 | H | B | 0.88 | -0.26 | 4.32 |
| 1159 | H | E | 0.87 | 0.07  | 3.68 | H | E | 0.86 | 0.08  | 3.02 | H | E | 0.88 | 0.11  | 3.29 | H | E | 0.88 | 0.07  | 3.14 | H | E | 0.85 | 0.04  | 4.05 | H | E | 0.86 | 0.13  | 4.34 | H | E | 0.85 | 0.06    | 4.25 | H | E | 0.88 | 0.09  | 4.42 |
| 1160 | H | E | 0.85 | 0.24  | 3.77 | H | E | 0.85 | 0.24  | 3.07 | H | E | 0.86 | 0.31  | 3.39 | H | E | 0.84 | 0.29  | 3.16 | H | E | 0.84 | 0.23  | 4.09 | H | E | 0.85 | 0.26  | 4.37 | H | E | 0.84 | 0.19    | 4.26 | H | E | 0.85 | 0.26  | 4.48 |
| 1161 | H | E | 0.82 | 0.06  | 3.87 | H | E | 0.83 | 0.01  | 3.14 | H | E | 0.84 | 0.11  | 3.44 | H | E | 0.84 | 0.03  | 3.21 | H | E | 0.82 | 0.04  | 4.11 | H | E | 0.82 | 0.07  | 4.38 | H | E | 0.82 | 0.08    | 4.33 | H | E | 0.84 | 0.12  | 4.55 |
| 1162 | H | B | 0.84 | -0.05 | 3.85 | H | B | 0.84 | -0.13 | 3.15 | H | B | 0.85 | -0.04 | 3.43 | H | B | 0.85 | -0.13 | 3.27 | H | B | 0.82 | -0.06 | 4.14 | H | B | 0.84 | -0.02 | 4.39 | H | B | 0.82 | -0.01   | 4.33 | H | B | 0.85 | -0.02 | 4.56 |
| 1163 | H | E | 0.85 | 0.13  | 3.88 | H | E | 0.86 | 0.10  | 3.23 | H | E | 0.86 | 0.16  | 3.50 | H | E | 0.86 | 0.12  | 3.31 | H | E | 0.83 | 0.09  | 4.13 | H | E | 0.85 | 0.13  | 4.38 | H | E | 0.83 | 0.12    | 4.38 | H | E | 0.87 | 0.10  | 4.56 |
| 1164 | H | E | 0.85 | 0.03  | 3.95 | H | E | 0.85 | 0.05  | 3.29 | H | E | 0.85 | 0.07  | 3.57 | H | E | 0.84 | 0.04  | 3.37 | H | E | 0.82 | -0.01 | 4.19 | H | E | 0.84 | 0.01  | 4.43 | H | E | 0.82 | 0.00    | 4.43 | H | E | 0.85 | 0.01  | 4.63 |
| 1165 | H | B | 0.87 | -0.19 | 3.91 | H | B | 0.88 | -0.21 | 3.25 | H | B | 0.87 | -0.17 | 3.51 | H | B | 0.89 | -0.20 | 3.36 | H | B | 0.85 | -0.19 | 4.13 | H | B | 0.86 | -0.24 | 4.41 | H | B | 0.85 | -0.24   | 4.37 | H | B | 0.87 | -0.24 | 4.59 |
| 1166 | H | B | 0.85 | -0.38 | 3.86 | H | B | 0.86 | -0.39 | 3.21 | H | B | 0.85 | -0.34 | 3.49 | H | B | 0.88 | -0.37 | 3.33 | H | B | 0.82 | -0.37 | 4.15 | H | B | 0.85 | -0.41 | 4.41 | H | B | 0.83 | -0.43   | 4.30 | H | B | 0.87 | -0.41 | 4.56 |
| 1167 | H | E | 0.87 | -0.11 | 3.93 | H | E | 0.88 | -0.18 | 3.28 | H | E | 0.87 | -0.13 | 3.57 | H | E | 0.88 | -0.18 | 3.39 | H | E | 0.85 | -0.10 | 4.19 | H | E | 0.87 | -0.16 | 4.45 | H | E | 0.85 | -0.17   | 4.30 | H | E | 0.88 | -0.17 | 4.62 |
| 1168 | H | E | 0.87 | -0.20 | 3.94 | H | E | 0.90 | -0.23 | 3.25 | H | E | 0.90 | -0.19 | 3.53 | H | E | 0.89 | -0.20 | 3.41 | H | E | 0.86 | -0.17 | 4.17 | H | E | 0.88 | -0.20 | 4.45 | H | E | 0.85 | -0.25   | 4.31 | H | E | 0.88 | -0.22 | 4.55 |
| 1169 | H | B | 0.86 | -0.52 | 3.86 | H | B | 0.90 | -0.51 | 3.20 | H | B | 0.88 | -0.50 | 3.44 | H | B | 0.89 | -0.50 | 3.40 | H | B | 0.85 | -0.53 | 4.14 | H | B | 0.87 | -0.50 | 4.44 | H | B | 0.85 | -0.53   | 4.28 | H | B | 0.88 | -0.51 | 4.50 |
| 1170 | H | B | 0.85 | -0.58 | 3.86 | H | B | 0.89 | -0.59 | 3.23 | H | B | 0.88 | -0.55 | 3.47 | H | B | 0.89 | -0.58 | 3.42 | H | B | 0.86 | -0.60 | 4.16 | H | B | 0.86 | -0.56 | 4.47 | H | B | 0.85 | -0.59   | 4.28 | H | B | 0.87 | -0.58 | 4.53 |
| 1171 | H | E | 0.86 | -0.43 | 3.92 | H | E | 0.89 | -0.38 | 3.29 | H | E | 0.88 | -0.37 | 3.53 | H | E | 0.89 | -0.42 | 3.50 | H | E | 0.86 | -0.42 | 4.23 | H | E | 0.87 | -0.41 | 4.53 | H | E | 0.85 | -0.44</ |      |   |   |      |       |      |

|      |   |   |      |       |      |   |   |      |       |      |   |   |      |       |      |   |   |      |       |      |   |   |      |       |      |   |   |      |       |      |   |   |      |       |      |   |   |      |       |      |
|------|---|---|------|-------|------|---|---|------|-------|------|---|---|------|-------|------|---|---|------|-------|------|---|---|------|-------|------|---|---|------|-------|------|---|---|------|-------|------|---|---|------|-------|------|
| 1186 | H | B | 0.85 | -0.45 | 3.56 | H | B | 0.87 | -0.43 | 3.02 | H | B | 0.86 | -0.44 | 3.08 | H | B | 0.88 | -0.48 | 3.42 | H | E | 0.84 | -0.41 | 4.09 | H | E | 0.86 | -0.43 | 4.40 | H | E | 0.85 | -0.45 | 4.20 | H | B | 0.86 | -0.46 | 4.34 |
| 1187 | H | B | 0.84 | -0.60 | 3.60 | H | B | 0.87 | -0.57 | 3.02 | H | B | 0.86 | -0.58 | 3.10 | H | B | 0.88 | -0.61 | 3.40 | H | B | 0.84 | -0.58 | 4.06 | H | B | 0.85 | -0.60 | 4.37 | H | B | 0.84 | -0.64 | 4.23 | H | B | 0.85 | -0.60 | 4.35 |
| 1188 | H | B | 0.85 | -0.74 | 3.65 | H | B | 0.87 | -0.72 | 3.08 | H | B | 0.86 | -0.74 | 3.19 | H | B | 0.88 | -0.75 | 3.41 | H | B | 0.84 | -0.75 | 4.09 | H | B | 0.86 | -0.76 | 4.39 | H | B | 0.85 | -0.78 | 4.21 | H | B | 0.86 | -0.74 | 4.38 |
| 1189 | H | B | 0.85 | -0.71 | 3.60 | H | B | 0.87 | -0.66 | 3.05 | H | B | 0.86 | -0.71 | 3.15 | H | B | 0.88 | -0.71 | 3.36 | H | B | 0.84 | -0.68 | 4.07 | H | B | 0.86 | -0.72 | 4.38 | H | B | 0.85 | -0.75 | 4.18 | H | B | 0.86 | -0.69 | 4.36 |
| 1190 | H | E | 0.85 | -0.63 | 3.55 | H | E | 0.87 | -0.60 | 2.98 | H | E | 0.86 | -0.64 | 3.08 | H | B | 0.88 | -0.66 | 3.29 | H | E | 0.84 | -0.64 | 4.00 | H | B | 0.86 | -0.67 | 4.31 | H | B | 0.85 | -0.70 | 4.18 | H | B | 0.86 | -0.66 | 4.30 |
| 1191 | H | B | 0.85 | -0.73 | 3.62 | H | B | 0.88 | -0.71 | 3.03 | H | B | 0.87 | -0.73 | 3.16 | H | B | 0.89 | -0.76 | 3.29 | H | B | 0.85 | -0.73 | 4.02 | H | B | 0.86 | -0.76 | 4.32 | H | B | 0.85 | -0.78 | 4.20 | H | B | 0.86 | -0.75 | 4.34 |
| 1192 | H | B | 0.85 | -0.74 | 3.63 | H | B | 0.88 | -0.70 | 3.06 | H | B | 0.87 | -0.77 | 3.21 | H | B | 0.89 | -0.80 | 3.28 | H | B | 0.85 | -0.79 | 4.03 | H | B | 0.86 | -0.77 | 4.34 | H | B | 0.85 | -0.79 | 4.18 | H | B | 0.86 | -0.76 | 4.37 |
| 1193 | H | E | 0.85 | -0.56 | 3.56 | H | B | 0.88 | -0.55 | 2.99 | H | B | 0.86 | -0.61 | 3.13 | H | B | 0.89 | -0.62 | 3.21 | H | E | 0.84 | -0.58 | 3.98 | H | B | 0.85 | -0.60 | 4.29 | H | B | 0.85 | -0.62 | 4.17 | H | B | 0.85 | -0.59 | 4.32 |
| 1194 | H | B | 0.84 | -0.65 | 3.58 | H | B | 0.88 | -0.63 | 2.96 | H | B | 0.85 | -0.66 | 3.13 | H | B | 0.89 | -0.67 | 3.17 | H | B | 0.82 | -0.67 | 3.97 | H | B | 0.85 | -0.65 | 4.26 | H | B | 0.84 | -0.66 | 4.20 | H | B | 0.85 | -0.65 | 4.31 |
| 1195 | H | B | 0.84 | -0.77 | 3.67 | H | B | 0.88 | -0.75 | 3.04 | H | B | 0.85 | -0.78 | 3.25 | H | B | 0.89 | -0.81 | 3.20 | H | B | 0.82 | -0.82 | 4.02 | H | B | 0.85 | -0.75 | 4.31 | H | B | 0.84 | -0.77 | 4.21 | H | B | 0.85 | -0.74 | 4.37 |
| 1196 | H | B | 0.83 | -0.74 | 3.65 | H | B | 0.88 | -0.73 | 3.04 | H | B | 0.84 | -0.73 | 3.27 | H | B | 0.89 | -0.77 | 3.18 | H | B | 0.82 | -0.77 | 4.02 | H | B | 0.84 | -0.74 | 4.32 | H | B | 0.83 | -0.78 | 4.20 | H | B | 0.84 | -0.72 | 4.39 |
| 1197 | H | B | 0.84 | -0.50 | 3.59 | H | B | 0.87 | -0.52 | 2.99 | H | B | 0.85 | -0.48 | 3.20 | H | B | 0.89 | -0.52 | 3.11 | H | B | 0.83 | -0.52 | 3.95 | H | B | 0.85 | -0.51 | 4.26 | H | B | 0.84 | -0.56 | 4.18 | H | B | 0.85 | -0.49 | 4.33 |
| 1198 | H | B | 0.82 | -0.32 | 3.67 | H | B | 0.86 | -0.26 | 3.02 | H | B | 0.83 | -0.27 | 3.26 | H | B | 0.88 | -0.31 | 3.12 | H | B | 0.81 | -0.33 | 4.01 | H | B | 0.83 | -0.32 | 4.29 | H | B | 0.82 | -0.38 | 4.24 | H | B | 0.83 | -0.31 | 4.38 |
| 1199 | H | B | 0.74 | -0.37 | 3.84 | H | B | 0.79 | -0.42 | 3.17 | H | B | 0.76 | -0.32 | 3.45 | H | B | 0.82 | -0.33 | 3.22 | H | B | 0.74 | -0.42 | 4.17 | H | B | 0.74 | -0.37 | 4.48 | H | B | 0.75 | -0.41 | 4.37 | H | B | 0.75 | -0.36 | 4.56 |
| 1200 | C | B | 0.65 | -0.22 | 3.91 | C | B | 0.72 | -0.21 | 3.24 | C | B | 0.66 | -0.17 | 3.56 | C | B | 0.74 | -0.17 | 3.29 | C | B | 0.65 | -0.31 | 4.30 | C | B | 0.68 | -0.22 | 4.57 | C | B | 0.70 | -0.26 | 4.44 | C | B | 0.69 | -0.24 | 4.67 |
| 1201 | C | E | 0.67 | 0.13  | 3.98 | C | E | 0.74 | 0.24  | 3.30 | C | E | 0.70 | 0.22  | 3.64 | C | E | 0.77 | 0.22  | 3.29 | C | E | 0.67 | 0.08  | 4.34 | C | E | 0.70 | 0.12  | 4.60 | C | E | 0.68 | 0.07  | 4.49 | C | E | 0.68 | 0.13  | 4.75 |
| 1202 | C | E | 0.68 | 0.08  | 4.05 | C | E | 0.71 | 0.11  | 3.35 | C | E | 0.70 | 0.13  | 3.70 | C | E | 0.75 | 0.12  | 3.34 | C | E | 0.66 | -0.02 | 4.38 | C | E | 0.69 | 0.00  | 4.63 | C | E | 0.68 | 0.02  | 4.51 | C | E | 0.71 | 0.06  | 4.75 |
| 1203 | C | B | 0.65 | -0.17 | 4.13 | C | E | 0.69 | -0.19 | 3.43 | C | B | 0.66 | -0.22 | 3.81 | C | B | 0.72 | -0.22 | 3.43 | C | B | 0.64 | -0.29 | 4.46 | C | B | 0.66 | -0.24 | 4.72 | C | B | 0.63 | -0.31 | 4.60 | C | B | 0.62 | -0.27 | 4.93 |
| 1204 | H | B | 0.71 | -0.25 | 4.03 | H | B | 0.75 | -0.19 | 3.35 | H | B | 0.72 | -0.30 | 3.70 | H | B | 0.76 | -0.26 | 3.40 | H | B | 0.71 | -0.33 | 4.32 | H | B | 0.74 | -0.29 | 4.58 | H | B | 0.72 | -0.33 | 4.43 | H | B | 0.70 | -0.32 | 4.77 |
| 1205 | H | E | 0.74 | -0.18 | 3.95 | H | E | 0.77 | -0.13 | 3.33 | H | E | 0.75 | -0.20 | 3.64 | H | E | 0.78 | -0.14 | 3.38 | H | E | 0.73 | -0.21 | 4.28 | H | E | 0.76 | -0.17 | 4.55 | H | E | 0.75 | -0.18 | 4.36 | H | E | 0.74 | -0.19 | 4.70 |
| 1206 | H | E | 0.73 | -0.14 | 4.03 | H | E | 0.78 | -0.05 | 3.40 | H | E | 0.74 | -0.10 | 3.74 | H | E | 0.78 | -0.06 | 3.46 | H | E | 0.73 | -0.14 | 4.35 | H | E | 0.75 | -0.11 | 4.63 | H | E | 0.75 | -0.11 | 4.40 | H | E | 0.73 | -0.09 | 4.78 |
| 1207 | H | B | 0.74 | -0.43 | 4.00 | H | B | 0.78 | -0.38 | 3.38 | H | B | 0.76 | -0.41 | 3.66 | H | B | 0.78 | -0.37 | 3.48 | H | B | 0.75 | -0.47 | 4.33 | H | B | 0.76 | -0.41 | 4.61 | H | B | 0.76 | -0.44 | 4.38 | H | B | 0.75 | -0.41 | 4.74 |
| 1208 | H | B | 0.75 | -0.56 | 3.89 | H | B | 0.78 | -0.60 | 3.29 | H | B | 0.76 | -0.53 | 3.55 | H | B | 0.80 | -0.54 | 3.40 | H | B | 0.75 | -0.62 | 4.27 | H | B | 0.77 | -0.55 | 4.55 | H | B | 0.78 | -0.59 | 4.32 | H | B | 0.76 | -0.56 | 4.64 |
| 1209 | H | B | 0.77 | -0.44 | 3.89 | H | B | 0.79 | -0.49 | 3.33 | H | B | 0.77 | -0.41 | 3.60 | H | B | 0.81 | -0.45 | 3.43 | H | B | 0.76 | -0.49 | 4.28 | H | B | 0.78 | -0.44 | 4.59 | H | B | 0.78 | -0.44 | 4.31 | H | B | 0.78 | -0.44 | 4.66 |
| 1210 | H | B | 0.78 | -0.55 | 3.94 | H | B | 0.79 | -0.54 | 3.38 | H | B | 0.77 | -0.55 | 3.64 | H | B | 0.81 | -0.57 | 3.51 | H | B | 0.76 | -0.60 | 4.34 | H | B | 0.78 | -0.57 | 4.63 | H | B | 0.78 | -0.57 | 4.34 | H | B | 0.78 | -0.56 | 4.69 |
| 1211 | H | B | 0.78 | -0.64 | 3.86 | H | B | 0.78 | -0.61 | 3.32 | H | B | 0.78 | -0.64 | 3.52 | H | B | 0.82 | -0.60 | 3.48 | H | B | 0.76 | -0.67 | 4.30 | H | B | 0.78 | -0.63 | 4.59 | H | B | 0.78 | -0.64 | 4.32 | H | B | 0.78 | -0.62 | 4.63 |
| 1212 | H | B | 0.77 | -0.62 | 3.81 | H | B | 0.78 | -0.64 | 3.30 | H | B | 0.77 | -0.65 | 3.48 | H | B | 0.80 | -0.62 | 3.46 | H | B | 0.75 | -0.64 | 4.28 | H | B | 0.77 | -0.61 | 4.61 | H | B | 0.77 | -0.62 | 4.31 | H | B | 0.77 | -0.61 | 4.62 |
| 1213 | H | E | 0.77 | -0.45 | 3.86 | H | B | 0.79 | -0.49 | 3.35 | H | B | 0.78 | -0.44 | 3.53 | H | B | 0.82 | -0.44 | 3.53 | H | E | 0.77 | -0.48 | 4.33 | H | B | 0.77 | -0.45 | 4.69 | H | B | 0.77 | -0.47 | 4.34 | H | B | 0.77 | -0.44 | 4.68 |
| 1214 | H | B | 0.77 | -0.60 | 3.85 | H | B | 0.79 | -0.68 | 3.33 | H | B | 0.78 | -0.56 | 3.48 | H | B | 0.82 | -0.57 | 3.57 | H | B | 0.77 | -0.64 | 4.34 | H | B | 0.77 | -0.57 | 4.70 | H | B | 0.76 | -0.58 | 4.36 | H | B | 0.77 | -0.58 | 4.67 |
| 1215 | H | B | 0.76 | -0.61 | 3.77 | H | B | 0.79 | -0.66 | 3.26 | H | B | 0.78 | -0.55 | 3.39 | H | B | 0.82 | -0.57 | 3.51 | H | B | 0.76 | -0.65 | 4.29 | H | B | 0.76 | -0.54 | 4.65 | H | B | 0.76 | -0.59 | 4.33 | H | B | 0.76 | -0.59 | 4.62 |
| 1216 | H | B | 0.72 | -0.52 | 3.80 | H | B | 0.74 | -0.45 | 3.33 | H | B | 0.75 | -0.51 | 3.45 | C | B | 0.78 | -0.50 | 3.60 | H | B | 0.73 | -0.59 | 4.34 | C | B | 0.73 | -0.48 | 4.82 | C | B | 0.75 | -0.48 | 4.43 | C | B | 0.74 | -0.52 | 4.75 |
| 1217 | H | B | 0.69 | -0.32 | 3.89 | H | B | 0.74 | -0.33 | 3.39 | C | B | 0.73 | -0.30 | 3.55 | C | B | 0.78 | -0.31 | 3.71 | H | B | 0.72 | -0.39 | 4.42 | C | B | 0.73 | -0.28 | 4.95 | C | B | 0.73 | -0.29 | 4.48 | C | B | 0.74 | -0.35 | 4.85 |
| 1218 | H | B | 0.68 | -0.42 | 3.83 | H | B | 0.73 | -0.44 | 3.31 | C | B | 0.72 | -0.37 | 3.46 | C | B | 0.78 | -0.36 | 3.69 | H | B | 0.72 | -0.45 | 4.37 | C | B | 0.72 | -0.33 | 4.91 | C | B | 0.73 | -0.28 | 4.48 | C | B | 0.73 | -0.41 | 4.79 |
| 1219 | H | B | 0.69 | -0.43 | 3.80 | H | B | 0.73 | -0.39 | 3.33 | C | B | 0.71 | -0.37 | 3.39 | C | B | 0.78 | -0.32 | 3.58 | H | B | 0.69 | -0.42 | 4.44 | C | B | 0.69 | -0.32 | 4.86 | C | B | 0.71 | -0.26 | 4.41 | C | B | 0.72 | -0.39 | 4.71 |
| 1220 | C | B | 0.75 | -0.27 | 3.64 | H | B | 0.79 | -0.13 | 3.25 | C | B | 0.77 | -0.19 | 3.27 | C | B | 0.82 | -0.17 | 3.55 | C | B | 0.74 | -0.22 | 4.35 | C | B | 0.77 | -0.16 | 4.71 | C | B | 0.75 | -0.17 | 4.32 | C | B | 0.78 | -0.23 | 4.56 |
| 1221 | C | B | 0.76 | -0.07 | 3.61 | C | B | 0.79 | 0.01  | 3.16 | C | B | 0.76 | -0.00 | 3.21 | C | B | 0.81 | -0.02 | 3.59 | C | B | 0.76 | -0.04 | 4.32 | C | B | 0.76 | 0.07  | 4.72 | C | B | 0.75 | 0.03  | 4.34 | C | B | 0.78 | -0.00 | 4.53 |
| 1222 | C | B | 0.77 | 0.14  | 3.56 | C | B | 0.81 | 0.15  | 3.11 | C | B | 0.78 | 0.21  | 3.14 | C | B | 0.82 | 0.19  | 3.59 | C | B | 0.76 | 0.10  | 4.33 | C | B | 0.77 | 0.15  | 4.71 | C | B | 0.75 | 0.23  | 4.36 | C | B | 0.78 | 0.19  | 4.53 |
| 1223 | C | B | 0.78 | -0.06 | 3.56 | C | B | 0.81 | -0.06 | 3.08 | C | B | 0.78 | -0.01 | 3.11 | C | B | 0.83 | -0.03 | 3.57 | C | B | 0.77 | -0.08 | 4.29 | C | B | 0.78 | -0.05 | 4.65 | C | B | 0.77 | -0.04 | 4.35 | C | B | 0.78 | -0.03 | 4.50 |
| 1224 | H | B | 0.78 | -0.20 | 3.45 | H | B | 0.81 | -0.11 | 2.97 | H | B | 0.79 | -0.12 | 3.01 | H | B | 0.83 | -0.12 | 3.44 | H | B | 0.78 | -0.21 | 4.15 | H | B | 0.77 | -0.17 | 4.52 | H | B | 0.76 | -0.21 | 4.28 | H | B | 0.77 | -0.16 | 4.40 |
| 1225 | H | E | 0.78 | -0.15 | 3.49 | H | E | 0.80 | -0.11 | 2.98 | H | E | 0.79 | -0.17 | 3.01 | H | E | 0.83 | -0.13 | 3.43 | H | E | 0.78 | -0.19 | 4.13 | H | E | 0.77 | -0.18 | 4.49 | H | E | 0.76 | -0.   |      |   |   |      |       |      |

|      |   |   |      |       |      |   |   |      |       |      |   |   |      |       |      |   |   |      |       |      |   |   |      |       |      |   |   |      |       |      |   |   |      |       |      |   |   |      |       |      |
|------|---|---|------|-------|------|---|---|------|-------|------|---|---|------|-------|------|---|---|------|-------|------|---|---|------|-------|------|---|---|------|-------|------|---|---|------|-------|------|---|---|------|-------|------|
| 1240 | H | B | 0.74 | -0.31 | 3.78 | H | B | 0.78 | -0.30 | 3.19 | H | B | 0.77 | -0.27 | 3.44 | H | B | 0.79 | -0.28 | 3.27 | H | B | 0.74 | -0.32 | 4.17 | H | B | 0.75 | -0.31 | 4.49 | H | B | 0.74 | -0.35 | 4.33 | H | B | 0.75 | -0.32 | 4.58 |
| 1241 | H | B | 0.73 | -0.32 | 3.85 | H | B | 0.78 | -0.31 | 3.27 | H | B | 0.75 | -0.33 | 3.55 | H | B | 0.78 | -0.32 | 3.39 | H | B | 0.72 | -0.34 | 4.25 | H | B | 0.73 | -0.33 | 4.59 | H | B | 0.71 | -0.34 | 4.40 | H | B | 0.74 | -0.38 | 4.66 |
| 1242 | C | B | 0.72 | -0.27 | 3.84 | C | B | 0.73 | -0.16 | 3.34 | C | B | 0.75 | -0.23 | 3.59 | C | B | 0.76 | -0.18 | 3.34 | C | B | 0.72 | -0.27 | 4.28 | C | B | 0.73 | -0.19 | 4.61 | C | B | 0.71 | -0.22 | 4.42 | C | B | 0.72 | -0.28 | 4.73 |
| 1243 | C | B | 0.70 | 0.03  | 3.88 | H | B | 0.72 | 0.15  | 3.37 | C | B | 0.72 | 0.06  | 3.67 | C | B | 0.76 | 0.15  | 3.41 | C | B | 0.70 | -0.03 | 4.39 | C | B | 0.69 | 0.11  | 4.77 | C | B | 0.68 | 0.11  | 4.55 | C | B | 0.68 | 0.05  | 4.86 |
| 1244 | H | E | 0.70 | -0.00 | 3.89 | H | E | 0.75 | -0.07 | 3.39 | H | E | 0.72 | -0.07 | 3.69 | H | E | 0.78 | -0.02 | 3.35 | H | B | 0.71 | -0.05 | 4.31 | H | E | 0.68 | -0.02 | 4.70 | H | E | 0.68 | -0.04 | 4.43 | H | E | 0.69 | -0.06 | 4.78 |
| 1245 | H | B | 0.72 | -0.18 | 3.87 | H | B | 0.74 | -0.21 | 3.39 | H | B | 0.74 | -0.15 | 3.66 | H | B | 0.78 | -0.22 | 3.39 | H | B | 0.72 | -0.18 | 4.29 | H | B | 0.72 | -0.13 | 4.68 | H | E | 0.70 | -0.15 | 4.40 | H | B | 0.72 | -0.16 | 4.75 |
| 1246 | H | B | 0.72 | -0.33 | 3.78 | H | B | 0.74 | -0.39 | 3.33 | H | B | 0.73 | -0.31 | 3.55 | H | B | 0.78 | -0.38 | 3.36 | H | B | 0.72 | -0.36 | 4.25 | H | B | 0.71 | -0.32 | 4.66 | H | B | 0.69 | -0.36 | 4.38 | H | B | 0.72 | -0.37 | 4.69 |
| 1247 | H | B | 0.72 | -0.39 | 3.77 | H | B | 0.74 | -0.34 | 3.36 | H | B | 0.73 | -0.32 | 3.60 | H | B | 0.78 | -0.35 | 3.36 | H | B | 0.72 | -0.39 | 4.26 | H | B | 0.72 | -0.34 | 4.68 | H | B | 0.70 | -0.38 | 4.37 | H | B | 0.72 | -0.40 | 4.70 |
| 1248 | H | E | 0.72 | -0.30 | 3.86 | H | E | 0.73 | -0.28 | 3.44 | H | E | 0.73 | -0.22 | 3.69 | H | E | 0.78 | -0.28 | 3.44 | H | E | 0.72 | -0.28 | 4.32 | H | E | 0.72 | -0.30 | 4.74 | H | E | 0.70 | -0.27 | 4.40 | H | E | 0.72 | -0.30 | 4.77 |
| 1249 | H | B | 0.72 | -0.39 | 3.83 | H | B | 0.73 | -0.39 | 3.40 | H | B | 0.72 | -0.40 | 3.62 | H | B | 0.78 | -0.41 | 3.46 | H | B | 0.72 | -0.38 | 4.34 | H | B | 0.71 | -0.46 | 4.76 | H | B | 0.69 | -0.46 | 4.41 | H | B | 0.72 | -0.46 | 4.75 |
| 1250 | H | B | 0.72 | -0.51 | 3.75 | H | B | 0.73 | -0.50 | 3.37 | H | B | 0.72 | -0.51 | 3.57 | H | B | 0.78 | -0.57 | 3.42 | H | B | 0.72 | -0.51 | 4.30 | H | B | 0.71 | -0.56 | 4.74 | H | B | 0.68 | -0.59 | 4.40 | H | B | 0.72 | -0.57 | 4.72 |
| 1251 | H | B | 0.71 | -0.50 | 3.81 | H | B | 0.73 | -0.45 | 3.44 | H | B | 0.73 | -0.43 | 3.67 | H | B | 0.78 | -0.51 | 3.45 | H | B | 0.71 | -0.46 | 4.35 | H | B | 0.70 | -0.50 | 4.81 | H | B | 0.68 | -0.49 | 4.44 | H | B | 0.71 | -0.48 | 4.80 |
| 1252 | H | B | 0.72 | -0.05 | 3.84 | H | B | 0.73 | -0.23 | 3.48 | H | B | 0.73 | -0.16 | 3.69 | H | B | 0.78 | -0.26 | 3.52 | H | E | 0.72 | -0.20 | 4.40 | H | B | 0.71 | -0.13 | 4.87 | H | E | 0.68 | -0.16 | 4.45 | H | E | 0.72 | -0.20 | 4.82 |
| 1253 | H | B | 0.72 | -0.31 | 3.80 | C | B | 0.72 | -0.27 | 3.49 | H | B | 0.72 | -0.33 | 3.59 | H | B | 0.78 | -0.35 | 3.50 | H | B | 0.71 | -0.34 | 4.45 | H | B | 0.71 | -0.31 | 4.84 | H | B | 0.68 | -0.37 | 4.42 | H | B | 0.72 | -0.34 | 4.76 |
| 1254 | C | B | 0.71 | -0.44 | 3.73 | C | B | 0.72 | -0.37 | 3.48 | C | B | 0.72 | -0.35 | 3.67 | C | B | 0.78 | -0.44 | 3.51 | C | B | 0.71 | -0.35 | 4.38 | C | B | 0.71 | -0.41 | 4.92 | C | B | 0.68 | -0.42 | 4.52 | C | B | 0.72 | -0.39 | 4.84 |
| 1255 | C | B | 0.69 | -0.29 | 3.79 | C | B | 0.72 | -0.21 | 3.49 | C | B | 0.71 | -0.24 | 3.70 | C | B | 0.77 | -0.25 | 3.52 | C | B | 0.68 | -0.20 | 4.49 | C | B | 0.70 | -0.26 | 4.94 | C | B | 0.68 | -0.30 | 4.48 | C | B | 0.71 | -0.28 | 4.81 |
| 1256 | C | B | 0.69 | 0.05  | 3.82 | C | B | 0.72 | -0.01 | 3.48 | C | B | 0.72 | 0.04  | 3.67 | C | B | 0.76 | 0.06  | 3.61 | C | B | 0.68 | -0.02 | 4.52 | C | B | 0.70 | 0.10  | 4.99 | C | B | 0.68 | 0.01  | 4.49 | C | B | 0.71 | 0.00  | 4.83 |
| 1257 | C | B | 0.71 | -0.06 | 3.80 | C | B | 0.74 | -0.09 | 3.48 | C | B | 0.72 | -0.03 | 3.67 | C | B | 0.77 | -0.02 | 3.64 | C | B | 0.70 | -0.01 | 4.55 | C | B | 0.71 | -0.06 | 5.03 | C | B | 0.68 | -0.09 | 4.49 | C | B | 0.72 | -0.13 | 4.81 |
| 1258 | H | B | 0.71 | 0.06  | 3.79 | H | B | 0.74 | -0.03 | 3.46 | H | B | 0.73 | 0.08  | 3.60 | H | B | 0.78 | 0.09  | 3.67 | H | B | 0.71 | 0.01  | 4.57 | C | B | 0.71 | 0.11  | 5.00 | H | B | 0.70 | 0.05  | 4.50 | H | B | 0.72 | 0.05  | 4.82 |
| 1259 | H | E | 0.72 | -0.06 | 3.61 | H | E | 0.75 | -0.11 | 3.31 | H | E | 0.73 | -0.00 | 3.44 | H | E | 0.78 | -0.03 | 3.55 | H | E | 0.71 | -0.05 | 4.41 | H | E | 0.71 | 0.01  | 4.88 | H | E | 0.69 | -0.04 | 4.38 | H | E | 0.72 | -0.01 | 4.64 |
| 1260 | H | E | 0.73 | -0.11 | 3.60 | H | E | 0.74 | -0.15 | 3.28 | H | E | 0.73 | -0.01 | 3.37 | H | E | 0.78 | -0.05 | 3.55 | H | E | 0.72 | -0.10 | 4.38 | H | E | 0.71 | -0.02 | 4.85 | H | E | 0.69 | -0.07 | 4.38 | H | E | 0.72 | -0.01 | 4.64 |
| 1261 | H | B | 0.73 | -0.29 | 3.64 | H | B | 0.75 | -0.31 | 3.30 | H | B | 0.74 | -0.21 | 3.42 | H | B | 0.79 | -0.23 | 3.52 | H | B | 0.72 | -0.27 | 4.36 | H | B | 0.72 | -0.25 | 4.83 | H | B | 0.70 | -0.30 | 4.37 | H | B | 0.73 | -0.24 | 4.65 |
| 1262 | H | B | 0.72 | -0.21 | 3.61 | H | B | 0.72 | -0.21 | 3.32 | H | B | 0.73 | -0.12 | 3.45 | H | B | 0.78 | -0.13 | 3.47 | H | B | 0.71 | -0.20 | 4.34 | H | B | 0.71 | -0.17 | 4.80 | H | B | 0.69 | -0.21 | 4.37 | H | B | 0.72 | -0.15 | 4.64 |
| 1263 | H | E | 0.72 | -0.02 | 3.53 | H | E | 0.73 | 0.00  | 3.24 | H | E | 0.73 | 0.05  | 3.34 | H | E | 0.78 | 0.03  | 3.43 | H | E | 0.71 | 0.02  | 4.29 | H | E | 0.71 | 0.00  | 4.75 | H | E | 0.69 | -0.07 | 4.35 | H | E | 0.72 | 0.01  | 4.59 |
| 1264 | H | B | 0.70 | -0.28 | 3.58 | H | B | 0.72 | -0.25 | 3.23 | H | B | 0.72 | -0.22 | 3.33 | H | B | 0.77 | -0.23 | 3.43 | H | B | 0.68 | -0.27 | 4.30 | H | B | 0.69 | -0.21 | 4.74 | H | B | 0.68 | -0.32 | 4.37 | H | B | 0.70 | -0.25 | 4.61 |
| 1265 | H | B | 0.69 | -0.39 | 3.65 | H | B | 0.72 | -0.38 | 3.29 | H | B | 0.72 | -0.36 | 3.42 | H | B | 0.77 | -0.38 | 3.42 | H | B | 0.68 | -0.39 | 4.31 | H | B | 0.69 | -0.36 | 4.75 | H | B | 0.68 | -0.44 | 4.37 | H | B | 0.69 | -0.36 | 4.67 |
| 1266 | H | B | 0.68 | -0.32 | 3.60 | H | B | 0.72 | -0.25 | 3.26 | H | B | 0.70 | -0.29 | 3.43 | H | B | 0.76 | -0.28 | 3.36 | H | B | 0.67 | -0.31 | 4.30 | H | B | 0.68 | -0.30 | 4.73 | H | B | 0.66 | -0.37 | 4.39 | H | B | 0.68 | -0.27 | 4.66 |
| 1267 | H | B | 0.69 | -0.42 | 3.53 | H | B | 0.73 | -0.36 | 3.18 | H | B | 0.72 | -0.39 | 3.30 | H | B | 0.77 | -0.38 | 3.32 | H | B | 0.68 | -0.38 | 4.23 | H | B | 0.69 | -0.39 | 4.65 | H | B | 0.68 | -0.45 | 4.35 | H | B | 0.69 | -0.39 | 4.58 |
| 1268 | H | B | 0.69 | -0.43 | 3.59 | H | B | 0.73 | -0.36 | 3.20 | H | B | 0.72 | -0.41 | 3.34 | H | B | 0.78 | -0.36 | 3.32 | H | B | 0.68 | -0.39 | 4.24 | H | B | 0.69 | -0.42 | 4.65 | H | B | 0.68 | -0.47 | 4.36 | H | B | 0.69 | -0.39 | 4.60 |
| 1269 | H | B | 0.69 | -0.43 | 3.62 | H | B | 0.72 | -0.35 | 3.27 | H | B | 0.72 | -0.44 | 3.44 | H | B | 0.78 | -0.35 | 3.29 | H | B | 0.68 | -0.41 | 4.24 | H | B | 0.69 | -0.44 | 4.66 | H | B | 0.68 | -0.49 | 4.36 | H | B | 0.69 | -0.40 | 4.64 |
| 1270 | H | B | 0.68 | -0.42 | 3.55 | H | B | 0.72 | -0.31 | 3.21 | H | B | 0.72 | -0.47 | 3.38 | H | B | 0.77 | -0.38 | 3.24 | H | B | 0.68 | -0.41 | 4.21 | H | B | 0.69 | -0.42 | 4.61 | H | B | 0.68 | -0.48 | 4.36 | H | B | 0.69 | -0.42 | 4.59 |
| 1271 | H | B | 0.68 | -0.37 | 3.54 | H | B | 0.72 | -0.29 | 3.18 | H | B | 0.72 | -0.42 | 3.30 | H | B | 0.76 | -0.38 | 3.24 | H | B | 0.68 | -0.38 | 4.18 | H | B | 0.69 | -0.36 | 4.56 | H | B | 0.68 | -0.41 | 4.35 | H | B | 0.69 | -0.36 | 4.56 |
| 1272 | H | B | 0.68 | -0.29 | 3.62 | H | B | 0.71 | -0.32 | 3.25 | H | B | 0.71 | -0.35 | 3.41 | H | B | 0.76 | -0.27 | 3.25 | H | B | 0.68 | -0.28 | 4.21 | H | B | 0.69 | -0.30 | 4.58 | H | B | 0.68 | -0.36 | 4.36 | H | B | 0.68 | -0.32 | 4.62 |
| 1273 | H | B | 0.68 | -0.30 | 3.60 | H | B | 0.71 | -0.24 | 3.26 | H | B | 0.71 | -0.30 | 3.46 | H | B | 0.76 | -0.28 | 3.21 | H | B | 0.68 | -0.25 | 4.20 | H | B | 0.69 | -0.31 | 4.59 | H | B | 0.68 | -0.35 | 4.36 | H | B | 0.68 | -0.29 | 4.63 |
| 1274 | H | B | 0.68 | -0.32 | 3.53 | H | B | 0.70 | -0.26 | 3.21 | H | B | 0.71 | -0.31 | 3.38 | H | B | 0.75 | -0.34 | 3.16 | H | B | 0.68 | -0.30 | 4.15 | H | B | 0.68 | -0.30 | 4.54 | H | B | 0.67 | -0.32 | 4.36 | H | B | 0.68 | -0.31 | 4.58 |
| 1275 | C | B | 0.67 | -0.25 | 3.66 | C | B | 0.71 | -0.09 | 3.22 | C | B | 0.68 | -0.22 | 3.47 | C | B | 0.74 | -0.24 | 3.18 | C | B | 0.67 | -0.22 | 4.26 | C | B | 0.66 | -0.24 | 4.65 | C | B | 0.65 | -0.25 | 4.42 | C | B | 0.65 | -0.25 | 4.73 |
| 1276 | C | B | 0.67 | -0.19 | 3.71 | C | B | 0.68 | -0.02 | 3.30 | C | B | 0.68 | -0.15 | 3.54 | C | B | 0.72 | -0.18 | 3.24 | C | B | 0.66 | -0.15 | 4.24 | C | B | 0.67 | -0.22 | 4.61 | C | B | 0.64 | -0.27 | 4.45 | C | B | 0.66 | -0.20 | 4.70 |
| 1277 | H | B | 0.66 | -0.06 | 3.70 | C | B | 0.68 | 0.03  | 3.41 | C | B | 0.67 | -0.00 | 3.67 | C | B | 0.71 | -0.06 | 3.31 | C | B | 0.66 | 0.04  | 4.35 | C | B | 0.66 | -0.05 | 4.67 | C | B | 0.65 | -0.13 | 4.54 | C | B | 0.65 | -0.07 | 4.82 |
| 1278 | H | B | 0.68 | -0.02 | 3.74 | C | B | 0.66 | 0.03  | 3.45 | C | B | 0.68 | 0.01  | 3.71 | C | B | 0.69 | -0.06 | 3.32 | C | B | 0.68 | 0.03  | 4.35 | C | B | 0.68 | -0.08 | 4.72 | C | B | 0.66 | -0.13 | 4.52 | C | B | 0.67 | -0.07 | 4.83 |
| 1279 | H | B | 0.65 | -0.32 | 3.81 | C | B | 0.64 | -0.14 | 3.46 | H | B | 0.67 | -0.25 | 3.69 | H | B | 0.69 | -0.31 | 3.28 | H | B | 0.65 | -0.22 | 4.29 | H | B | 0.67 | -0.36 | 4.63 | H | B | 0.66 | -0.   |      |   |   |      |       |      |

|      |   |   |      |      |      |   |   |      |      |      |   |   |      |      |      |   |   |      |       |      |   |   |      |      |      |   |   |      |      |      |   |   |      |      |      |   |   |      |      |      |
|------|---|---|------|------|------|---|---|------|------|------|---|---|------|------|------|---|---|------|-------|------|---|---|------|------|------|---|---|------|------|------|---|---|------|------|------|---|---|------|------|------|
| 1294 | C | E | 0.47 | 0.22 | 4.27 | C | E | 0.50 | 0.15 | 3.95 | C | E | 0.51 | 0.22 | 4.39 | C | E | 0.52 | 0.18  | 3.68 | C | E | 0.51 | 0.25 | 4.83 | C | E | 0.49 | 0.26 | 5.32 | C | E | 0.50 | 0.27 | 4.81 | C | E | 0.49 | 0.24 | 5.37 |
| 1295 | S | B | 0.49 | 0.11 | 4.15 | S | B | 0.51 | 0.05 | 3.84 | S | B | 0.52 | 0.14 | 4.22 | S | B | 0.52 | 0.08  | 3.61 | S | B | 0.52 | 0.14 | 4.70 | S | B | 0.51 | 0.14 | 5.19 | S | B | 0.52 | 0.12 | 4.68 | C | B | 0.51 | 0.18 | 5.17 |
| 1296 | S | E | 0.48 | 0.12 | 4.24 | S | E | 0.49 | 0.05 | 3.95 | S | E | 0.52 | 0.08 | 4.31 | S | E | 0.50 | 0.07  | 3.72 | S | E | 0.52 | 0.16 | 4.79 | S | E | 0.51 | 0.10 | 5.21 | S | E | 0.52 | 0.11 | 4.78 | C | E | 0.50 | 0.16 | 5.24 |
| 1297 | H | B | 0.49 | 0.07 | 4.31 | H | B | 0.49 | 0.06 | 4.00 | H | B | 0.51 | 0.05 | 4.38 | H | B | 0.51 | -0.00 | 3.76 | H | B | 0.49 | 0.06 | 4.93 | H | B | 0.50 | 0.04 | 5.30 | H | B | 0.52 | 0.05 | 4.90 | H | B | 0.48 | 0.09 | 5.44 |
| 1298 | H | E | 0.52 | 0.21 | 4.32 | H | E | 0.54 | 0.25 | 3.98 | H | E | 0.53 | 0.25 | 4.47 | H | E | 0.57 | 0.21  | 3.65 | H | E | 0.52 | 0.21 | 4.88 | H | E | 0.53 | 0.22 | 5.28 | H | E | 0.54 | 0.23 | 4.84 | H | E | 0.52 | 0.24 | 5.38 |
| 1299 | H | B | 0.52 | 0.06 | 4.29 | H | B | 0.54 | 0.06 | 3.88 | H | B | 0.54 | 0.10 | 4.36 | H | B | 0.57 | 0.03  | 3.60 | H | B | 0.52 | 0.04 | 4.75 | H | B | 0.54 | 0.04 | 5.14 | H | B | 0.55 | 0.07 | 4.72 | H | B | 0.52 | 0.05 | 5.33 |
| 1300 | H | B | 0.52 | 0.24 | 4.31 | H | B | 0.55 | 0.25 | 3.86 | H | B | 0.55 | 0.25 | 4.33 | H | B | 0.57 | 0.19  | 3.62 | H | B | 0.53 | 0.20 | 4.72 | H | B | 0.54 | 0.22 | 5.12 | H | B | 0.55 | 0.22 | 4.72 | H | B | 0.53 | 0.27 | 5.31 |
| 1301 | H | E | 0.51 | 0.64 | 4.43 | H | E | 0.55 | 0.63 | 3.94 | H | E | 0.53 | 0.60 | 4.46 | H | E | 0.57 | 0.56  | 3.70 | H | B | 0.52 | 0.51 | 4.81 | H | E | 0.52 | 0.59 | 5.21 | H | E | 0.53 | 0.63 | 4.78 | H | E | 0.52 | 0.67 | 5.42 |
| 1302 | H | B | 0.50 | 0.54 | 4.49 | H | B | 0.54 | 0.55 | 4.00 | H | B | 0.52 | 0.56 | 4.56 | H | B | 0.57 | 0.46  | 3.72 | H | B | 0.51 | 0.49 | 4.89 | H | B | 0.51 | 0.56 | 5.28 | H | B | 0.52 | 0.56 | 4.86 | H | B | 0.49 | 0.60 | 5.53 |
| 1303 | C | B | 0.48 | 0.97 | 4.55 | C | B | 0.53 | 1.05 | 4.02 | C | B | 0.50 | 0.95 | 4.61 | C | B | 0.56 | 0.91  | 3.76 | C | B | 0.49 | 0.99 | 4.90 | C | B | 0.49 | 1.02 | 5.27 | C | B | 0.50 | 1.01 | 4.86 | C | B | 0.48 | 1.05 | 5.55 |
| 1304 | C | E | 0.46 | 1.81 | 4.74 | C | E | 0.50 | 1.89 | 4.17 | C | E | 0.48 | 1.79 | 4.79 | C | E | 0.53 | 1.84  | 3.91 | C | E | 0.47 | 1.81 | 5.13 | C | E | 0.47 | 1.80 | 5.48 | C | E | 0.48 | 1.86 | 5.08 | C | E | 0.45 | 1.86 | 5.77 |

RES: Residue number

SS: Predicted secondary structure: C - random coil; H - alpha-helix; S - beta-strand

SA: Predicted solvent accessibility at 25% cutoff: E - exposed; B - buried

COV: Threading alignment coverage defined as the number of threading alignments on the residue divided by the number of total threading programs

BFP: Predicted normalized B-factor

RSQ: Residue-Specific Quality of models defined as the estimated deviation of the residue on the model from the native structure of the protein
